# Supplementary material for: Dendritic mGluR2 and perisomatic Kv3 signaling regulate dendritic computation of mouse starburst amacrine cells
Source: Nat Commun. 2024 Feb 28;15:1819. doi: 10.1038/s41467-024-46234-7 (PMC10901804; doi:10.1038/s41467-024-46234-7)
Supplement: Supplementary file 2 — Source Data [file 41467_2024_46234_MOESM2_ESM.xlsx]

## Sheet: Fig 2
Fig 2a
Vm onset	EPSC onset	Vm peak	EPSC peak
594	723.5	791	1030.9
791.2	653.4	1012.2	1052.5
690	733.7	918	963.1
643	771.8	881	983.7
674	603.2	875	1023.1
649	582.6	862	1075.6
623	788.7	874	1029.6
689	614.5	953	985.8
653	592.1	874	972.1
797	784.4	984	851
Fig 2e
Vm	Full field	local stim
	-38	-50
	-39	-52.46
	-40	-43
	-32	-50.7
	-37	-50.2
	-44	-51.2
	-39	-39
	-47	-44
	-41	-52
	-32.9	-53.3
		-54.7
		-55.3
		-45
		-48

## Sheet: Fig 3
Fig 3b
Vhold	F	SEM
-95	0.0931663	0.00630966
-85	0.0589412	0.00431893
-75	0.0258851	0.00223247
-65	0.000644337	0.00187729
-55	-0.0270494	0.00165329
-45	-0.0503614	0.00254914
-35	-0.0724657	0.00377035
-25	-0.0892593	0.00404044
-15	-0.109721	0.00590538
-5	-0.122432	0.00685387
5	-0.138322	0.006526
Fig 3e - individual data points for boxplots
Bin	1	1	1	1	1	2	2	2	2	2	2	2	3	3	3	4	4	4	4	4	5	5
inward	-297	-214	-160	-194	-195	-161	-450	-266	-238	-354	-163	-281	-227	-211	-341	-248	-288	-234	-312	-346	-252	-305
outward	-311	-209	-238	-172	-304	-167	-230	-229	-327	-299	-259	-153	-113	-125	-23	-23	-102	-36	-27	-27	-48	6
Fig 3b
Time	F											SEM
	-95	-85	-75	-65	-55	-45	-35	-25	-15	-5	5	-95	-85	-75	-65	-55	-45	-35	-25	-15	-5	5
0.001	0.00240972	-0.00173415	-0.017275	-0.00821232	0.00255825	0.00132265	0.011115	0.00187886	0.00863485	-0.00759891	0.00761943	0.00391599	0.00710225	0.00807542	0.00440653	0.00407701	0.00697718	0.00856428	0.00534523	0.00635465	0.009019	0.00738672
0.002	0.00246027	-0.00171001	-0.0177376	-0.00831591	0.00261888	0.00126478	0.0117606	0.00196369	0.00892508	-0.00757776	0.00762421	0.00404084	0.00734845	0.00830711	0.00440534	0.00423124	0.00703797	0.00880742	0.00561628	0.00651436	0.00926738	0.0074712
0.003	0.00242291	-0.00166817	-0.0178087	-0.0082171	0.00260842	0.0011573	0.0121734	0.00200232	0.00902452	-0.00735896	0.00742502	0.00407254	0.00744012	0.00835556	0.00426907	0.00430499	0.00692372	0.00885712	0.00577973	0.00652274	0.00931774	0.0073751
0.004	0.00228749	-0.0016274	-0.0175031	-0.00792609	0.00252642	0.00100471	0.0123338	0.00199226	0.00893456	-0.00696085	0.0070374	0.00401441	0.00738037	0.00822604	0.00400388	0.00430336	0.0066487	0.00872086	0.00583214	0.00638412	0.00918268	0.00711488
0.005	0.00204758	-0.00160819	-0.0168545	-0.00746235	0.00237603	0.000813859	0.0122327	0.00193324	0.00866536	-0.00641182	0.00648688	0.00387711	0.0071797	0.00793295	0.00362531	0.00423683	0.00623748	0.00841649	0.00577524	0.00611052	0.00888679	0.00671932
0.006	0.00170133	-0.00163086	-0.0159133	-0.00685304	0.0021638	0.000593407	0.011872	0.00182728	0.00823488	-0.00574843	0.00580712	0.00367983	0.00685518	0.00749899	0.00316086	0.00412091	0.00572422	0.00797128	0.00561586	0.00572108	0.00846542	0.00622907
0.007	0.0012521	-0.00171355	-0.0147424	-0.00613098	0.0018994	0.000353117	0.0112647	0.00167864	0.00766759	-0.00501295	0.00503742	0.00345173	0.00642925	0.00695394	0.00265594	0.00397552	0.00515175	0.00742038	0.00536565	0.00524135	0.00796273	0.00569565
0.008	0.000708945	-0.00187029	-0.0134129	-0.00533228	0.00159506	0.00010312	0.0104344	0.0014936	0.00699274	-0.00425062	0.00422	0.00323268	0.00592836	0.00633325	0.00218763	0.00382359	0.00457038	0.00680481	0.00504051	0.0047027	0.00742859	0.00517882
0.009	8.66645e-05	-0.00210931	-0.0119991	-0.00449384	0.00126491	-0.000146832	0.00941428	0.00128021	0.00624249	-0.00350676	0.00339703	0.0030709	0.00538155	0.00567656	0.00188349	0.00368881	0.00403579	0.00616886	0.00465993	0.00414191	0.0069139	0.00474034
0.01	-0.000594429	-0.00243176	-0.010574	-0.00365093	0.000924188	-0.000388048	0.0082457	0.00104787	0.00544987	-0.0028239	0.00260786	0.00301292	0.00481897	0.00502604	0.00188601	0.00359221	0.00360354	0.00555676	0.00424608	0.00360136	0.00646399	0.00443131
0.011	-0.00130915	-0.00283101	-0.00920419	-0.00283495	0.000588376	-0.000613448	0.00697596	0.000806859	0.00464686	-0.00223924	0.00188654	0.00308542	0.00427059	0.00442445	0.00220467	0.00354802	0.00331664	0.00500815	0.00382277	0.00312885	0.00611059	0.00427447
0.012	-0.00202822	-0.00329195	-0.00794655	-0.00207141	0.000272364	-0.000818573	0.0056556	0.000567443	0.00386258	-0.00178324	0.0012596	0.00328086	0.00376486	0.00391229	0.0027083	0.00356044	0.00318735	0.00455285	0.00341346	0.00277393	0.0058643	0.00425321
0.013	-0.00271976	-0.00379298	-0.0068444	-0.00137906	-1.05136e-05	-0.00100038	0.00433662	0.000340287	0.00312166	-0.00147605	0.00074497	0.00356335	0.00332653	0.00352041	0.00327306	0.00362304	0.00318903	0.00420436	0.00304066	0.00257645	0.00571421	0.00431943
0.014	-0.00335188	-0.00430716	-0.00592549	-0.000769095	-0.000249282	-0.00115771	0.00307037	0.000135524	0.00244384	-0.0013283	0.000351774	0.0038859	0.00297425	0.00326142	0.00382487	0.00372149	0.00326976	0.00395723	0.00272294	0.00254474	0.00563282	0.00441572
0.015	-0.00389324	-0.00480325	-0.00520187	-0.000244825	-0.000435866	-0.00129156	0.00190369	-3.80017e-05	0.00184261	-0.00134058	7.97536e-05	0.00420382	0.00271731	0.00312388	0.00432229	0.00383775	0.00337622	0.00379136	0.00247113	0.00264671	0.00558599	0.00449371
0.016	-0.00431538	-0.00524845	-0.00467004	0.00019773	-0.000565628	-0.00140441	0.000877053	-0.000172977	0.00132524	-0.00150393	-7.96314e-05	0.00448101	0.00255274	0.00307543	0.00474246	0.00395408	0.00346862	0.00368077	0.00228604	0.002829	0.00554299	0.0045223
0.017	-0.00459448	-0.00561104	-0.00431242	0.000568761	-0.000637661	-0.00149968	2.24907e-05	-0.000263962	0.000892975	-0.00180095	-0.000141765	0.00469118	0.00246608	0.00307565	0.00507466	0.00405558	0.00352339	0.00360344	0.0021588	0.00304232	0.00548242	0.00448816
0.018	-0.00471306	-0.00586304	-0.00409985	0.000883192	-0.000654867	-0.00158115	-0.000637938	-0.000307623	0.000541663	-0.00220751	-0.000126963	0.00481766	0.00243655	0.00308901	0.00531741	0.00413138	0.00353016	0.00354708	0.002075	0.00325205	0.00539381	0.00439318
0.019	-0.00466124	-0.00598264	-0.00399472	0.00115889	-0.000623803	-0.00165232	-0.00109316	-0.000302873	0.000262676	-0.0026948	-5.82748e-05	0.00485296	0.00244399	0.00309121	0.00547687	0.00417493	0.0034879	0.00350999	0.00202084	0.00343714	0.00527646	0.0042509
0.02	-0.00443763	-0.00595628	-0.00395461	0.00141476	-0.000554312	-0.00171589	-0.00134348	-0.000250874	4.40801e-05	-0.00323157	4.07899e-05	0.00479846	0.00247343	0.00306954	0.00556537	0.00418373	0.00340177	0.00349799	0.00198804	0.00358616	0.00513678	0.00408251
0.021	-0.0040497	-0.00578011	-0.00393596	0.00166879	-0.000458938	-0.00177335	-0.00140025	-0.000154948	-0.000128071	-0.00378637	0.000148427	0.00466399	0.00251633	0.0030208	0.00559975	0.00415884	0.00328126	0.0035192	0.00197524	0.00369394	0.00498501	0.00391231
0.022	-0.00351377	-0.00546032	-0.00389804	0.00193554	-0.000352209	-0.00182527	-0.00128479	-2.08955e-05	-0.000268894	-0.00433039	0.000246448	0.00446716	0.00256906	0.00294869	0.00559941	0.00410405	0.00313914	0.00357889	0.00198594	0.00375953	0.00483189	0.00376264
0.023	-0.00285241	-0.00501305	-0.00380663	0.00222602	-0.000249795	-0.00187111	-0.00102672	0.000144101	-0.000393277	-0.00483807	0.000320706	0.00423235	0.00263015	0.00286147	0.00558309	0.00402491	0.00299101	0.00367603	0.00202479	0.00378543	0.00468597	0.00364844
0.024	-0.00209734	-0.00446486	-0.00363285	0.00254745	-0.000167245	-0.00190633	-0.000663202	0.000332493	-0.000512549	-0.00528811	0.000364413	0.00398726	0.00270002	0.00276845	0.00556593	0.00392839	0.00285572	0.00380148	0.00209336	0.00377678	0.00455175	0.00357425
0.025	-0.00128417	-0.00384907	-0.00335875	0.00290075	-0.000119308	-0.00192639	-0.000235035	0.000535369	-0.000636382	-0.00566581	0.000376196	0.00376002	0.00277675	0.00267855	0.00555767	0.00382105	0.0027531	0.00394138	0.00218679	0.00374178	0.00442878	0.00353389
0.026	-0.000451301	-0.00320388	-0.00297688	0.00328118	-0.000118876	-0.00192603	0.000215568	0.000743434	-0.00077127	-0.00596287	0.000360333	0.00357343	0.00285591	0.0025978	0.0055615	0.00370835	0.00270073	0.00408016	0.00229425	0.00369156	0.00431237	0.00351418
0.027	0.000362443	-0.00256938	-0.00249018	0.00367882	-0.000176133	-0.00189991	0.000647733	0.000947441	-0.000920247	-0.00617727	0.000325791	0.00343927	0.00293082	0.00252788	0.00557477	0.00359392	0.00270855	0.00420359	0.00240137	0.00363993	0.00419519	0.00350041
0.028	0.00112014	-0.00198431	-0.00191119	0.00407939	-0.000297853	-0.00184331	0.00102459	0.0011386	-0.0010829	-0.00631264	0.000284822	0.00335546	0.00299371	0.00246612	0.00559131	0.00347936	0.00277457	0.00430081	0.00249334	0.00360235	0.00406935	0.00348135
0.029	0.00178902	-0.00148293	-0.00126037	0.00446543	-0.000486902	-0.00175279	0.00131563	0.00130893	-0.00125568	-0.00637723	0.000251248	0.00330832	0.00303738	0.00240698	0.00560444	0.00336457	0.00288466	0.0043654	0.00255753	0.00359411	0.0039283	0.00345226
0.03	0.00234247	-0.00109207	-0.000564039	0.00481772	-0.000741985	-0.00162687	0.00149866	0.00145159	-0.00143239	-0.00638272	0.000238638	0.00327954	0.00305695	0.00234474	0.00560969	0.00324853	0.00301674	0.00439547	0.00258511	0.00362765	0.00376842	0.00341575
0.031	0.00276153	-0.000828934	0.000148052	0.00511679	-0.00105765	-0.00146649	0.00156113	0.00156108	-0.00160494	-0.00634267	0.000258528	0.00325401	0.00305128	0.00227654	0.00560651	0.00313018	0.00314658	0.00439327	0.00257208	0.00371	0.00359009	0.00338064
0.032	0.00303539	-0.000699597	0.000845209	0.00534385	-0.00142453	-0.0012757	0.0015009	0.00163316	-0.00176462	-0.00627134	0.000318425	0.00322532	0.00302387	0.00220483	0.00559852	0.00300926	0.00325259	0.00436422	0.00251935	0.00384111	0.0033983	0.00335895
0.033	0.00316299	-0.000699028	0.00149758	0.00548128	-0.00183122	-0.0010631	0.00132615	0.00166417	-0.00190308	-0.00618235	0.000420295	0.00319861	0.00298299	0.00213878	0.00559228	0.0028862	0.00331828	0.00431592	0.00243325	0.00401459	0.00320276	0.00336271
0.034	0.00315194	-0.000809655	0.00208008	0.00551914	-0.00226178	-0.000836121	0.00105431	0.00165417	-0.00201048	-0.00608638	0.00056296	0.00318782	0.00294035	0.00209319	0.00559451	0.00276294	0.00333449	0.00425616	0.00232412	0.00421954	0.00301774	0.00339815
0.035	0.0030177	-0.00100414	0.00257274	0.00545171	-0.00269876	-0.000604739	0.000710881	0.00160447	-0.00207862	-0.00599125	0.000739471	0.00321085	0.00290879	0.00208504	0.00560963	0.00264153	0.00329985	0.00419173	0.00220512	0.00444295	0.00286061	0.00346362
0.036	0.00278215	-0.00124764	0.0029619	0.00527806	-0.00312433	-0.000380795	0.000327461	0.00151752	-0.00210146	-0.00590148	0.00093755	0.00328159	0.00289898	0.00212681	0.00563753	0.00252311	0.00322121	0.00412705	0.00209012	0.00467183	0.00274895	0.00354937
0.037	0.00247169	-0.0015007	0.00324082	0.00500272	-0.00352107	-0.000176595	-6.08099e-05	0.00139705	-0.00207528	-0.00581795	0.00114093	0.00340255	0.00291602	0.00221996	0.00567293	0.0024072	0.00311358	0.00406339	0.00199083	0.00489464	0.00269601	0.00364002
0.038	0.00211514	-0.00172267	0.0034096	0.00463539	-0.00387307	-4.02748e-06	-0.000417944	0.00124783	-0.00199897	-0.00573814	0.00133072	0.00356216	0.0029577	0.00235327	0.00570665	0.00229134	0.00299909	0.0039988	0.00191404	0.005102	0.00270612	0.00371816
0.039	0.00174148	-0.00187537	0.00347453	0.00419026	-0.00416685	0.000126338	-0.000709893	0.00107538	-0.0018741	-0.00565671	0.00148711	0.00373799	0.00301542	0.00250671	0.00572837	0.00217168	0.0029042	0.00392887	0.00186018	0.00528686	0.00277281	0.00376786
0.04	0.00137759	-0.00192657	0.003447	0.00368509	-0.00439222	0.000206084	-0.000907187	0.000885737	-0.00170487	-0.00556631	0.00159109	0.00390305	0.00307728	0.00265763	0.00572992	0.00204435	0.00285421	0.00384796	0.00182427	0.00544438	0.0028813	0.00377712
0.041	0.00104638	-0.00185306	0.00334205	0.00314003	-0.00454281	0.000229634	-0.000987252	0.000685128	-0.0014978	-0.00545862	0.00162629	0.004032	0.00313181	0.00278558	0.00570816	0.00190742	0.00286573	0.00375071	0.0017992	0.00557168	0.00301343	0.00373919
0.042	0.000765354	-0.00164357	0.00317649	0.00257601	-0.00461611	0.000193966	-0.000936363	0.000479859	-0.00126153	-0.00532544	0.00158044	0.00410531	0.00317113	0.00287501	0.00566673	0.00176304	0.00294071	0.00363326	0.00177971	0.00566742	0.00315229	0.00365306
0.043	0.00054496	-0.00129864	0.00296823	0.00201432	-0.00461431	9.95255e-05	-0.000750034	0.000275434	-0.00100679	-0.00516022	0.00144601	0.00411157	0.00319288	0.00291626	0.00561536	0.0016193	0.00306571	0.00349408	0.00176521	0.00573155	0.00328476	0.00352308
0.044	0.000388686	-0.00083203	0.00273403	0.00147476	-0.00454326	-4.98817e-05	-0.000434245	7.69701e-05	-0.000745115	-0.00495856	0.00122157	0.00404839	0.00320026	0.00290596	0.00556811	0.00149141	0.00321813	0.00333449	0.00176088	0.00576495	0.00340263	0.00335823
0.045	0.000293526	-0.000268874	0.00248808	0.000975258	-0.00441151	-0.000243746	-5.72106e-06	-0.000110268	-0.000485713	-0.00471769	0.000913588	0.00392232	0.00320045	0.00284716	0.00553961	0.00140039	0.00337395	0.00315916	0.001776	0.00576939	0.0035026	0.00317079
0.046	0.000250076	0.000355165	0.00224155	0.000530301	-0.00423022	-0.000470648	0.000510348	-0.00028215	-0.000238491	-0.00443897	0.000533573	0.00374814	0.00320273	0.00274748	0.00553923	0.00136683	0.00351247	0.00297505	0.00182074	0.00574725	0.00358477	0.00297451
0.047	0.000243974	0.000997092	0.00200188	0.000150647	-0.00401193	-0.000717186	0.00108163	-0.000435333	-1.2129e-05	-0.00412744	9.8001e-05	0.00354725	0.0032152	0.00261815	0.00556712	0.00140011	0.0036191	0.00279102	0.00190155	0.00570149	0.00365161	0.00278273
0.048	0.000257494	0.00161007	0.00177273	-0.000157015	-0.00376947	-0.000968966	0.00167097	-0.000567292	0.000186449	-0.0037918	-0.00037307	0.00334501	0.00324196	0.00247239	0.00561279	0.00149171	0.00368609	0.00261708	0.00201799	0.00563577	0.00370663	0.00260651
0.049	0.00027137	0.0021473	0.0015542	-0.000390124	-0.00351492	-0.0012117	0.00223907	-0.000676317	0.000352484	-0.00344401	-0.000857745	0.00316701	0.00328181	0.00232355	0.00565724	0.00162032	0.0037122	0.00246353	0.00216294	0.00555445	0.0037532	0.0024536
0.05	0.000266673	0.00256594	0.00134349	-0.000550056	-0.00325864	-0.00143228	0.00274735	-0.000761484	0.000483676	-0.00309869	-0.00133422	0.00303417	0.00332907	0.00218346	0.00567767	0.00176261	0.00370189	0.00234026	0.00232553	0.00546255	0.00379372	0.00232845
0.051	0.000226591	0.00283076	0.00113573	-0.00064173	-0.00300845	-0.00161977	0.00316079	-0.000822593	0.000580318	-0.00277226	-0.00178271	0.00295832	0.0033761	0.00206122	0.00565296	0.00190036	0.00366411	0.00225581	0.00249475	0.00536549	0.0038293	0.0022335
0.052	0.000138512	0.00291658	0.000924795	-0.000673158	-0.00276953	-0.00176696	0.00345062	-0.000859998	0.000645498	-0.00248183	-0.00218726	0.00294068	0.00341679	0.00196295	0.00556836	0.00202287	0.0036107	0.00221642	0.00266228	0.00526875	0.00385988	0.00217087
0.053	-6.38142e-06	0.00281217	0.000704994	-0.000654444	-0.00254313	-0.00186897	0.00359614	-0.000874782	0.000684398	-0.00224427	-0.00253714	0.00297402	0.00344863	0.00189228	0.00541866	0.00212665	0.00355445	0.00222489	0.00282381	0.00517712	0.00388478	0.00214342
0.054	-0.000212732	0.00251973	0.000472169	-0.000596446	-0.00232844	-0.0019267	0.00358534	-0.000868347	0.000703841	-0.00207635	-0.00282864	0.00304805	0.00347399	0.00185205	0.00520896	0.00221422	0.00350681	0.00227937	0.00297962	0.005094	0.0039032	0.00215384
0.055	-0.000476952	0.00205603	0.00022306	-0.000512432	-0.00211996	-0.00194175	0.00341896	-0.000842673	0.00071339	-0.00198958	-0.00306316	0.00315561	0.00350082	0.00184342	0.00495668	0.00229164	0.00347638	0.00237431	0.00313292	0.00502111	0.00391506	0.00220265
0.056	-0.000791359	0.00145048	-4.26295e-05	-0.000415088	-0.00191074	-0.00192029	0.00310761	-0.000799923	0.000723359	-0.00199294	-0.00324922	0.00329366	0.00353947	0.00186634	0.00468734	0.00236606	0.00346726	0.00249931	0.00328889	0.00495792	0.00392103	0.00228522
0.057	-0.00114395	0.000743084	-0.000322252	-0.00031656	-0.00169254	-0.00187114	0.00267186	-0.000742445	0.000744594	-0.00209098	-0.00340094	0.00346249	0.00359929	0.00191829	0.00443061	0.00244274	0.00347901	0.0026408	0.00345243	0.00490189	0.00392252	0.00239119
0.058	-0.0015196	-1.8751e-05	-0.000610168	-0.000227873	-0.00145692	-0.00180495	0.00214077	-0.000672671	0.000787805	-0.00228333	-0.00353682	0.00366266	0.00368477	0.00199338	0.00421326	0.00252285	0.00350765	0.00278363	0.00362628	0.00484919	0.00392134	0.00250628
0.059	-0.00190155	-0.000783934	-0.000897981	-0.000158472	-0.0011963	-0.00173313	0.00154986	-0.000593033	0.000862864	-0.00256444	-0.00367795	0.00389203	0.00379295	0.0020829	0.00405095	0.00260273	0.00354738	0.00291256	0.00380982	0.00479561	0.00391922	0.00261542
0.06	-0.00227293	-0.00150178	-0.00117505	-0.000115881	-0.000905058	-0.00166686	0.00093851	-0.000505879	0.00097814	-0.00292367	-0.00384603	0.00414396	0.00391355	0.00217686	0.00394242	0.00267488	0.00359239	0.00301373	0.00399897	0.00473768	0.00391739	0.00270625
0.061	-0.00261828	-0.00212601	-0.00142921	-0.000105485	-0.000580456	-0.00161601	0.00034727	-0.000413409	0.00113988	-0.00334565	-0.00406122	0.00440744	0.00403127	0.00226615	0.00387011	0.00273017	0.00363814	0.00307597	0.00418707	0.0046735	0.00391634	0.00277203
0.062	-0.00292387	-0.00261909	-0.00164795	-0.000130065	-0.000223526	-0.00158866	-0.000184939	-0.000317505	0.00135204	-0.00381046	-0.0043401	0.00466892	0.00412948	0.00234438	0.00380729	0.0027605	0.00368181	0.00309197	0.00436622	0.00460314	0.00391589	0.00281374
0.063	-0.00318129	-0.00295332	-0.00181866	-0.000190751	0.000161154	-0.0015893	-0.000623659	-0.000219978	0.00161503	-0.00429593	-0.00469396	0.0049137	0.00419338	0.00240923	0.00372811	0.00276089	0.00372227	0.00305918	0.00452896	0.00452852	0.00391557	0.00284096
0.064	-0.00338703	-0.00311389	-0.00193011	-0.000284597	0.000565153	-0.00161807	-0.00094114	-0.000122044	0.00192602	-0.00477813	-0.00512659	0.00512839	0.00421221	0.00246273	0.00361587	0.00273108	0.0037591	0.0029808	0.00466926	0.00445291	0.00391479	0.00287162
0.065	-0.00354086	-0.0031002	-0.00197332	-0.000408745	0.000976274	-0.00167277	-0.00111792	-2.49075e-05	0.00227912	-0.00523211	-0.00563497	0.00530278	0.00418179	0.00250996	0.00346666	0.00267632	0.00379222	0.00286575	0.00478349	0.00437912	0.00391351	0.00292711
0.066	-0.00364606	-0.00292518	-0.00194224	-0.000559938	0.00137955	-0.00174861	-0.00114382	7.02401e-05	0.00266554	-0.00563351	-0.0062091	0.00543063	0.00410466	0.00255718	0.00329053	0.00260707	0.00382096	0.00272861	0.00487065	0.00430832	0.00391231	0.00302542
0.067	-0.00370968	-0.00261367	-0.00183433	-0.000732668	0.00175824	-0.00183717	-0.00101859	0.000162639	0.00307373	-0.00596027	-0.00683116	0.00550985	0.00398873	0.00260947	0.00311	0.00253711	0.00384328	0.00258912	0.00493193	0.00423953	0.00391213	0.00317499
0.068	-0.00374097	-0.00220017	-0.00165089	-0.000920611	0.00209502	-0.00192781	-0.000751394	0.000251733	0.00349005	-0.00619372	-0.00747713	0.00554241	0.00384626	0.00266829	0.00295446	0.00248051	0.00385607	0.00246966	0.00497011	0.00416922	0.00391407	0.00337042
0.069	-0.00375008	-0.00172555	-0.00139707	-0.00111701	0.00237333	-0.00200848	-0.000359799	0.000337131	0.0038995	-0.00631976	-0.00811836	0.00553365	0.0036917	0.00273046	0.002851	0.00244752	0.00385563	0.00239086	0.0049888	0.00409206	0.00391897	0.00359398
0.07	-0.00374668	-0.00123338	-0.00108172	-0.00131505	0.00257873	-0.00206672	0.000131891	0.000418562	0.00428653	-0.00632969	-0.00872358	0.00549127	0.00353909	0.00278883	0.00281347	0.00244093	0.00383863	0.00236564	0.00499164	0.00400249	0.00392708	0.00382099
0.071	-0.00373878	-0.000766082	-0.000716981	-0.0015083	0.00270013	-0.0020906	0.0006947	0.000495821	0.00463597	-0.00622078	-0.00926116	0.00542407	0.00339958	0.00283444	0.00283622	0.00245488	0.00380303	0.00239481	0.00498182	0.00389678	0.00393794	0.0040258
0.072	-0.00373141	-0.000361223	-0.000317514	-0.00169085	0.00273061	-0.00206998	0.00129717	0.000568572	0.00493383	-0.00599595	-0.00970126	0.00534083	0.00327961	0.00285923	0.00289829	0.00247693	0.00374882	0.00246733	0.00496194	0.00377521	0.00395056	0.00418616
0.073	-0.00372647	-4.83775e-05	0.000100025	-0.00185817	0.00266838	-0.00199655	0.00190816	0.00063668	0.00516841	-0.0056651	-0.0100185	0.00524888	0.00318059	0.00285857	0.00297473	0.00249228	0.0036786	0.00256565	0.00493407	0.00364359	0.00396343	0.00428595
0.074	-0.00372258	0.000153431	0.000517593	-0.00200686	0.00251669	-0.00186477	0.00249863	0.00069995	0.00533087	-0.00524369	-0.0101935	0.00515353	0.00310011	0.00283286	0.00304785	0.00248813	0.00359716	0.00267172	0.00490014	0.00351418	0.00397516	0.00431663
0.075	-0.00371578	0.000237539	0.000915798	-0.00213454	0.0022833	-0.00167159	0.00304311	0.00075836	0.00541563	-0.00475212	-0.0102129	0.00505769	0.00303424	0.00278795	0.0031132	0.00245723	0.00351049	0.00277089	0.00486221	0.00340493	0.00398509	0.00427807
0.076	-0.00369599	0.000208057	0.00127982	-0.00224249	0.00198175	-0.00141926	0.00352381	0.000811122	0.0054213	-0.00421309	-0.0100754	0.00496208	0.00298007	0.00273461	0.00317957	0.00239782	0.00342587	0.00285488	0.0048237	0.00333674	0.00399258	0.00417591
0.077	-0.00365254	8.10354e-05	0.00159498	-0.00233311	0.00162847	-0.00111236	0.00392897	0.0008576	0.00535024	-0.00365176	-0.00978716	0.00486598	0.00293646	0.00268588	0.00326494	0.00231617	0.0033487	0.00292031	0.00478815	0.00332774	0.00399792	0.00402294
0.078	-0.00357399	-0.000117955	0.00184916	-0.00241071	0.00124216	-0.000758235	0.00425397	0.000897044	0.00520864	-0.00309358	-0.00936287	0.00476813	0.00290402	0.00265348	0.00338782	0.00222548	0.00328158	0.00296799	0.00475911	0.00338687	0.00400193	0.0038368
0.079	-0.00344963	-0.000356476	0.00203327	-0.00248134	0.000842238	-0.000366376	0.00450111	0.000928632	0.00500605	-0.0025626	-0.00882488	0.00466776	0.00288389	0.00264401	0.00355766	0.00214404	0.00322368	0.00300148	0.00473935	0.00350999	0.0040057	0.00363778
0.08	-0.00327097	-0.000598479	0.00214162	-0.00255245	0.000447366	5.23473e-05	0.0046787	0.000951523	0.00475482	-0.00207981	-0.00820148	0.00456536	0.00287619	0.00265687	0.00376883	0.00209118	0.00317134	0.00302563	0.0047301	0.00368108	0.00401033	0.00344624
0.081	-0.00303305	-0.000807856	0.00217203	-0.00263243	7.39309e-05	0.000486533	0.00479982	0.000964933	0.00446919	-0.00166172	-0.0075249	0.0044632	0.00287904	0.00268524	0.00400123	0.00208125	0.00311989	0.00304541	0.00473049	0.00387759	0.00401687	0.00327978
0.082	-0.00273582	-0.000951724	0.00212594	-0.00273029	-0.000265053	0.000924978	0.00488051	0.000967929	0.00416405	-0.00131885	-0.00682878	0.00436538	0.00288872	0.00271997	0.00422616	0.00211796	0.00306617	0.00306514	0.00473759	0.00407642	0.00402615	0.0031508
0.083	-0.00238419	-0.00100426	0.00200767	-0.00285449	-0.000561293	0.00135771	0.00493826	0.00096025	0.00385475	-0.00105568	-0.00614623	0.00427741	0.00290112	0.00275444	0.00441358	0.0021929	0.003011	0.00308824	0.00474643	0.00425779	0.00403906	0.00306513
0.084	-0.00198859	-0.000948859	0.00182429	-0.00301259	-0.000811519	0.00177644	0.00499007	0.000941942	0.00355554	-0.00086985	-0.00550719	0.00420545	0.00291366	0.00278866	0.00453785	0.00228942	0.00296103	0.00311741	0.00475101	0.00440759	0.00405659	0.00302236
0.085	-0.0015671	-0.000779833	0.00158228	-0.00320964	-0.00101837	0.00217554	0.00505053	0.000913168	0.00327698	-0.000751722	-0.00493522	0.0041551	0.00292725	0.00283117	0.00458119	0.00238868	0.00292977	0.00315362	0.00474496	0.00451845	0.00408063	0.00301863
0.086	-0.00113817	-0.000503182	0.00129405	-0.00344983	-0.00118793	0.00255076	0.00513104	0.000874964	0.00302931	-0.000686354	-0.00444863	0.00413055	0.00294656	0.00289811	0.00453591	0.00247457	0.00293392	0.0031997	0.0047231	0.00458822	0.004112	0.0030462
0.087	-0.000723735	-0.000136265	0.000972484	-0.00373441	-0.00133031	0.00290036	0.00523876	0.000828783	0.0028191	-0.000653816	-0.00405782	0.00413385	0.00297966	0.00300816	0.00440465	0.00253626	0.00298981	0.00325815	0.00468155	0.00461953	0.00415148	0.0030963
0.088	-0.000347368	0.000293604	0.000630205	-0.00406121	-0.00145844	0.00322468	0.00537594	0.000776581	0.00264892	-0.000630605	-0.00376447	0.00416475	0.0030358	0.0031752	0.00419967	0.00256895	0.00310733	0.00333074	0.00461793	0.00461862	0.00419942	0.00315972
0.089	-3.18909e-05	0.000751418	0.00027961	-0.00442468	-0.00158644	0.00352564	0.00554011	0.00072081	0.00251759	-0.000591585	-0.00356207	0.00422108	0.00312201	0.00340171	0.00394137	0.00257345	0.00328522	0.00341855	0.00453151	0.0045937	0.00425533	0.00322653
0.09	0.000202522	0.00119746	-6.7671e-05	-0.00481586	-0.00172798	0.00380616	0.00572466	0.00066434	0.00242041	-0.000511958	-0.00343672	0.00429956	0.00324001	0.0036768	0.00365573	0.00255525	0.00351091	0.00352164	0.00442301	0.00455344	0.00431765	0.00328639
0.091	0.00034011	0.00159069	-0.000401238	-0.00522263	-0.00189476	0.00406954	0.00591974	0.000610347	0.0023496	-0.000369283	-0.00336848	0.00439659	0.00338474	0.00397927	0.00337078	0.00252309	0.00376419	0.00363902	0.00429447	0.00450578	0.0043839	0.00332958
0.092	0.000370476	0.00189245	-0.000711898	-0.00563042	-0.00209503	0.00431871	0.00611325	0.000562015	0.00229478	-0.00014533	-0.00333273	0.00450872	0.00354526	0.00428305	0.00311214	0.00248708	0.00402212	0.003769	0.00414918	0.00445733	0.0044509	0.00334878
0.093	0.000290818	0.00206944	-0.000992731	-0.00602229	-0.00233263	0.00455579	0.00629277	0.000522738	0.00224445	0.000172193	-0.00330342	0.00463297	0.00370723	0.00456236	0.00289813	0.00245663	0.00426299	0.00390934	0.00399152	0.00441293	0.00451531	0.00334102
0.094	0.0001057	0.00209684	-0.00123866	-0.00638016	-0.00260624	0.0047815	0.00644668	0.000495722	0.00218662	0.00058845	-0.00325464	0.00476641	0.00385582	0.00479515	0.00273639	0.00243845	0.00446878	0.0040576	0.00382722	0.00437606	0.00457403	0.0033098
0.095	-0.000174459	0.00196037	-0.00144706	-0.00668592	-0.00291019	0.00499431	0.00656523	0.000483959	0.00210888	0.00110128	-0.00316298	0.00490534	0.00397819	0.00496515	0.00262414	0.00243525	0.00462643	0.00421088	0.00366358	0.00434927	0.00462492	0.0032667
0.096	-0.000532647	0.00165763	-0.00161675	-0.00692246	-0.00323361	0.00519083	0.0066415	0.000489904	0.00200057	0.00170047	-0.00300917	0.00504511	0.00406498	0.00506306	0.00255263	0.00244582	0.00472816	0.00436598	0.00350949	0.00433457	0.00466642	0.00323034
0.097	-0.000943623	0.00119876	-0.00174613	-0.00707483	-0.00355901	0.00536757	0.00667231	0.000514652	0.00185575	0.00236676	-0.00277939	0.00518086	0.00411088	0.00508671	0.00251341	0.00246631	0.00477138	0.00452022	0.0033748	0.00433335	0.0046968	0.00322247
0.098	-0.00138025	0.000605152	-0.00183552	-0.00713126	-0.00386722	0.00551887	0.00665813	0.000558748	0.00167058	0.00307503	-0.00246713	0.00530634	0.00411475	0.00504077	0.00250238	0.00249217	0.00475814	0.00466952	0.00326939	0.00434585	0.00471534	0.00326307
0.099	-0.00181395	-9.20264e-05	-0.0018858	-0.00708404	-0.00413763	0.00563818	0.00660291	0.000621778	0.001445	0.00379502	-0.00207341	0.00541495	0.00407898	0.00493591	0.00251987	0.00252005	0.00469416	0.0048089	0.00320128	0.00437057	0.00472157	0.00336208
0.1	-0.00221693	-0.00085433	-0.00189817	-0.00693025	-0.00435	0.00571869	0.00651346	0.000702353	0.00118296	0.00449341	-0.00160677	0.00550044	0.00400873	0.00478757	0.00256703	0.00254898	0.00458767	0.00493268	0.0031746	0.00440388	0.00471515	0.00351445
0.101	-0.00256437	-0.00163907	-0.00187379	-0.00667204	-0.00448637	0.00575399	0.00639844	0.000798147	0.000892283	0.00513599	-0.00108256	0.0055578	0.00391092	0.00461438	0.00264114	0.00258072	0.00444813	0.00503505	0.00318814	0.00444001	0.00469582	0.00370113
0.102	-0.00283631	-0.00240215	-0.0018134	-0.00631687	-0.00453321	0.0057387	0.00626764	0.000905435	0.000584921	0.00568986	-0.000522283	0.00558397	0.00379352	0.00443627	0.00273282	0.00261919	0.00428499	0.00511071	0.00323543	0.00447151	0.00466369	0.00389496
0.103	-0.00301968	-0.00310311	-0.00171773	-0.00587662	-0.00448143	0.00566945	0.00612953	0.00102078	0.000274509	0.00612673	4.93882e-05	0.00557821	0.00366497	0.00427256	0.00282654	0.00266916	0.00410663	0.00515611	0.00330578	0.00449088	0.00461966	0.00406707
0.104	-0.00310856	-0.00370674	-0.00158712	-0.00536766	-0.00432844	0.00554508	0.00599085	0.00114025	-2.32018e-05	0.00642408	0.000605569	0.00554218	0.00353397	0.00413997	0.00290394	0.00273446	0.00391997	0.00516998	0.00338696	0.0044914	0.00456591	0.00419236
0.105	-0.00310479	-0.00418561	-0.00142149	-0.00480967	-0.00407876	0.00536707	0.00585574	0.0012595	-0.00029132	0.00656693	0.00111916	0.00547955	0.00340949	0.00405103	0.00294788	0.00281634	0.00373042	0.00515394	0.00346743	0.00446824	0.00450638	0.00425259
0.106	-0.00302184	-0.00452308	-0.00121575	-0.00422293	-0.00374532	0.0051393	0.00572156	0.00137322	-0.00051801	0.00655296	0.00156125	0.00539376	0.00330264	0.00401359	0.00294569	0.00291187	0.00354118	0.00511273	0.00353651	0.00441949	0.00444557	0.00423874
0.107	-0.00287155	-0.00471211	-0.000976606	-0.00363224	-0.00334365	0.00486938	0.00558987	0.00147851	-0.000682152	0.0063808	0.00191512	0.0052914	0.00321957	0.00402819	0.00289235	0.00301638	0.00335831	0.00505341	0.00358931	0.00434647	0.00439279	0.00414844
0.108	-0.00267454	-0.00475718	-0.000704309	-0.00305859	-0.00289541	0.00456753	0.0054539	0.0015724	-0.000770562	0.00606305	0.00216597	0.00517674	0.00316733	0.0040911	0.0027909	0.00312172	0.00318713	0.0049853	0.00362308	0.00425355	0.00435624	0.00398908
0.109	-0.00245466	-0.00467313	-0.000399486	-0.00252009	-0.00242524	0.0042462	0.00530364	0.00165277	-0.000773513	0.00562102	0.00230573	0.00505226	0.00315023	0.00419413	0.00265321	0.00321865	0.00303415	0.00491843	0.0036381	0.0041478	0.00434306	0.00377588
0.11	-0.0022368	-0.00448334	-6.34647e-05	-0.00203077	-0.00195871	0.00391963	0.00512689	0.00171861	-0.000685397	0.00508331	0.00233392	0.00491843	0.00316837	0.00432555	0.00249953	0.00329843	0.00290688	0.00486188	0.00363704	0.00403818	0.00435773	0.00353024
0.111	-0.00204464	-0.00421741	0.00030144	-0.00159945	-0.00152024	0.0036031	0.00491063	0.00177013	-0.000505151	0.00448383	0.00225776	0.00477405	0.00321744	0.00447112	0.00235637	0.00335404	0.00281266	0.00482226	0.00362433	0.00393456	0.00440048	0.00327723
0.112	-0.00189828	-0.00390823	0.000691853	-0.00122868	-0.00113147	0.00331242	0.00464263	0.00180826	-0.000236212	0.00385964	0.00209107	0.0046174	0.00328976	0.00461514	0.00225183	0.0033812	0.00275699	0.0048027	0.00360519	0.00384671	0.00446676	0.0030422
0.113	-0.00181313	-0.00358943	0.00110293	-0.000915393	-0.000808412	0.0030624	0.00431284	0.00183595	0.000113113	0.00324821	0.00185509	0.0044474	0.00337633	0.00474153	0.00220752	0.00337895	0.00274189	0.00480261	0.00358501	0.00378349	0.0045476	0.00284537
0.114	-0.00179819	-0.00329187	0.00152847	-0.000650445	-0.000560789	0.00286646	0.00391497	0.00185718	0.000530498	0.00268481	0.00157578	0.00426518	0.00346922	0.00483514	0.0022303	0.00334969	0.00276522	0.00481823	0.00356863	0.00375203	0.00463087	0.00269711
0.115	-0.00185511	-0.0030411	0.00196112	-0.000419108	-0.000391383	0.00273598	0.00344772	0.00187655	0.00100036	0.00220027	0.00128178	0.0040753	0.00356333	0.00488292	0.00231022	0.00329882	0.00282157	0.00484372	0.00355985	0.00375698	0.00470314	0.0025951
0.116	-0.00197856	-0.00285521	0.00239508	-0.000202643	-0.000295379	0.00268012	0.00291464	0.00189847	0.00150396	0.00181989	0.001002	0.00388558	0.00365705	0.0048757	0.00242697	0.00323447	0.00290369	0.00487249	0.00356045	0.00380006	0.00475146	0.00252553
0.117	-0.00215633	-0.00274395	0.0028201	2.07814e-05	-0.000261265	0.00270434	0.002327	0.00192823	0.00202271	0.00155957	0.000764964	0.00370793	0.00375185	0.00480783	0.00255842	0.00316529	0.00300591	0.0048976	0.00357206	0.00387961	0.00476502	0.00246936
0.118	-0.00237005	-0.00270728	0.00322506	0.000274393	-0.000272059	0.00281029	0.00170128	0.00197184	0.00253757	0.00142618	0.000597104	0.00355622	0.00385137	0.00467849	0.00268711	0.00309855	0.00312466	0.00491298	0.00359528	0.0039897	0.0047352	0.00240828
0.119	-0.0025974	-0.00273598	0.00360097	0.000580609	-0.00030626	0.00299647	0.00105785	0.00203435	0.00302988	0.00141808	0.000519675	0.00344271	0.003959	0.0044926	0.00280212	0.00303964	0.00325841	0.00491354	0.00362893	0.00412049	0.00465649	0.0023284
0.12	-0.00281392	-0.00281259	0.00393955	0.000959164	-0.000340128	0.0032581	0.000420298	0.00212008	0.00348298	0.001525	0.00054789	0.0033752	0.00407573	0.00426032	0.0028982	0.00299077	0.00340732	0.00489484	0.00367089	0.0042588	0.00452683	0.00222193
0.121	-0.00299509	-0.00291319	0.00423365	0.00142528	-0.000349889	0.00358748	-0.000186234	0.0022322	0.00388332	0.00172902	0.000689956	0.00335453	0.00419869	0.00399651	0.00297395	0.0029512	0.00357205	0.00485308	0.00371844	0.00438927	0.00434771	0.00208677
0.122	-0.00311843	-0.00300977	0.00447757	0.00198859	-0.000314141	0.00397477	-0.000736918	0.00237217	0.00422101	0.00200656	0.000945973	0.00337438	0.00432088	0.00371956	0.00303036	0.00291856	0.00375234	0.00478508	0.00376859	0.00449578	0.0041243	0.00192593
0.123	-0.00316544	-0.00307248	0.00466734	0.00265056	-0.000215406	0.00440803	-0.00120955	0.00254043	0.00449095	0.0023296	0.0013096	0.00342361	0.00443213	0.00344951	0.00306873	0.00289094	0.00394585	0.0046886	0.0038187	0.00456301	0.00386513	0.00174618
0.124	-0.00312319	-0.00307241	0.00480072	0.0034047	-4.22574e-05	0.00487419	-0.00158618	0.00273572	0.0046927	0.00266821	0.00176763	0.00348984	0.00452085	0.00320525	0.00309072	0.00286903	0.00414777	0.00456273	0.00386685	0.00457788	0.00358221	0.00155903
0.125	-0.00298544	-0.00298429	0.00487722	0.00423675	0.000209449	0.00536011	-0.00185468	0.00295479	0.00483036	0.00299311	0.00230058	0.00356275	0.00457605	0.00300114	0.00309866	0.00285751	0.00435102	0.00440836	0.00391209	0.00453085	0.00329106	0.00138302
0.126	-0.00275288	-0.00278819	0.00489826	0.00512448	0.000536495	0.00585337	-0.00200992	0.00319286	0.00491257	0.0032781	0.00288447	0.00363605	0.00458911	0.00284404	0.00309626	0.00286501	0.004547	0.0042286	0.00395455	0.00441705	0.00301051	0.00124675
0.127	-0.00243299	-0.00247093	0.00486668	0.00603825	0.000929066	0.00634363	-0.00205402	0.00344387	0.00495218	0.00350223	0.00349223	0.00370762	0.0045548	0.00273264	0.00308925	0.00290215	0.00472667	0.00402893	0.00399512	0.00423707	0.00276201	0.00118821
0.128	-0.00204145	-0.00203172	0.00478535	0.00694633	0.00136762	0.00681988	-0.00199746	0.00369932	0.00496285	0.00364786	0.00409586	0.00377964	0.00447332	0.00265638	0.00308446	0.00297843	0.00488149	0.00381641	0.00403699	0.00399594	0.00256766	0.00123995
0.129	-0.00159789	-0.00147661	0.00465908	0.00781232	0.00182879	0.00727454	-0.00185716	0.00395034	0.00496072	0.0037062	0.00466821	0.00385599	0.00434864	0.00260345	0.00309053	0.00309753	0.0050042	0.0035998	0.00408299	0.00370485	0.0024455	0.00140277
0.13	-0.00112552	-0.00082031	0.00449335	0.0085991	0.0022858	0.00770252	-0.00165562	0.0041875	0.00496218	0.00367608	0.00518466	0.00394057	0.00418863	0.00256497	0.00311544	0.00325481	0.00508949	0.0033883	0.0041356	0.00338057	0.0024037	0.00164822
0.131	-0.000649318	-8.52144e-05	0.0042939	0.00927124	0.0027108	0.00810126	-0.00141912	0.0044012	0.00498259	0.00356373	0.00562459	0.00403565	0.00400415	0.00253871	0.00316419	0.00343752	0.00513441	0.00319045	0.00419632	0.00304519	0.00243673	0.001941
0.132	-0.000194006	0.000700226	0.00406611	0.00979703	0.00307701	0.00847073	-0.00117553	0.00458167	0.00503459	0.00338221	0.00597234	0.00414104	0.0038078	0.00253053	0.00323677	0.00362743	0.00513852	0.00301319	0.00426516	0.00272544	0.00252737	0.00225129
0.133	0.00021791	0.00150361	0.00381567	0.0101514	0.00336183	0.0088129	-0.000952206	0.00472071	0.005128	0.00314977	0.00621861	0.00425423	0.00361254	0.00255262	0.00332789	0.00380419	0.00510382	0.00286145	0.00434058	0.00245133	0.0026532	0.00255629
0.134	0.00056744	0.00229098	0.00354786	0.0103175	0.00354845	0.00913158	-0.000773432	0.00481134	0.00526838	0.00288848	0.00636031	0.00437117	0.0034304	0.00261943	0.00342792	0.00394853	0.00503449	0.00273849	0.0044196	0.00225152	0.00279272	0.00283863
0.135	0.000840556	0.00302919	0.00326714	0.0102873	0.00362719	0.0094318	-0.000658368	0.00484781	0.00545615	0.00262252	0.00640038	0.00448759	0.0032714	0.00274173	0.00352501	0.00404471	0.00493644	0.00264683	0.00449826	0.00214478	0.00292846	0.00308548
0.136	0.0010291	0.00368825	0.00297741	0.0100627	0.00359667	0.0097191	-0.000619455	0.00482621	0.00568654	0.00237607	0.00634744	0.00460002	0.00314296	0.00292155	0.00360755	0.00408205	0.0048168	0.00258934	0.0045722	0.00213105	0.00304749	0.00328831
0.137	0.00113191	0.00424315	0.00268089	0.00965412	0.00346646	0.00999866	-0.00066062	0.00474675	0.00595109	0.00217382	0.00621606	0.00470642	0.00304923	0.00315221	0.00366599	0.00405551	0.0046838	0.00257005	0.00463669	0.00219022	0.00314019	0.00344321
0.138	0.00115301	0.00467594	0.0023811	0.00908304	0.00325028	0.0102748	-0.000778093	0.00460864	0.00623424	0.00203234	0.00602256	0.00480554	0.00299243	0.00341738	0.00369375	0.003967	0.00454455	0.00259227	0.00468828	0.00229362	0.00320076	0.00354973
0.139	0.00110174	0.00497662	0.00208132	0.00837767	0.00296963	0.01055	-0.000960765	0.00441368	0.0065175	0.00196452	0.00578577	0.00489654	0.00297215	0.00369719	0.00368789	0.0038244	0.00440531	0.00265813	0.00472415	0.00241402	0.00322535	0.0036112
0.14	0.000991992	0.00514345	0.00178444	0.0075711	0.00265172	0.0108246	-0.00119033	0.00416621	0.00678022	0.00197792	0.00552558	0.00497806	0.00298541	0.00397197	0.00364854	0.00364119	0.0042709	0.00276653	0.00474207	0.00253093	0.00321173	0.00363402
0.141	0.000840725	0.00518277	0.00149344	0.00669941	0.00232662	0.0110961	-0.00144309	0.00387235	0.00700061	0.00207361	0.00526107	0.00504739	0.00302703	0.00422399	0.00357805	0.00343521	0.00414437	0.00291252	0.00474056	0.00263133	0.00315921	0.00362662
0.142	0.000666179	0.00510812	0.00121106	0.00579946	0.00202496	0.0113586	-0.00169205	0.00353985	0.00715735	0.00224614	0.0050092	0.00510028	0.00309	0.00443859	0.00348019	0.00322656	0.00402692	0.00308818	0.0047188	0.00270808	0.00306885	0.00359842
0.143	0.000487049	0.00493911	0.000940635	0.00490567	0.00177494	0.0116034	-0.00190919	0.00317774	0.00723133	0.00248386	0.00478362	0.0051313	0.0031666	0.0046049	0.00335927	0.00303459	0.00391836	0.00328466	0.00467668	0.00275837	0.00294398	0.00355885
0.144	0.000320772	0.00469975	0.000685705	0.00404802	0.0016	0.0118188	-0.00206782	0.00279574	0.0072067	0.0027701	0.00459376	0.00513499	0.00324983	0.00471599	0.00321992	0.00287399	0.00381757	0.00349423	0.00461485	0.00278266	0.00279085	0.00351668
0.145	0.000181916	0.00441626	0.000449478	0.00325038	0.00151709	0.0119906	-0.00214495	0.00240386	0.00707225	0.00308432	0.00444416	0.00510737	0.00333489	0.00476874	0.00306729	0.00275092	0.00372295	0.00371175	0.00453493	0.00278398	0.00261932	0.00347962
0.146	8.14375e-05	0.00411511	0.000234887	0.00252887	0.00153502	0.0121025	-0.00212331	0.00201201	0.00682249	0.00340358	0.00433431	0.0050475	0.00342062	0.00476375	0.0029078	0.00266136	0.00363278	0.00393506	0.00443953	0.00276755	0.00244336	0.00345419
0.147	2.61078e-05	0.00382098	4.38473e-05	0.00189079	0.0016545	0.0121374	-0.00199261	0.00163054	0.00645865	0.0037047	0.00425901	0.00495861	0.00351011	0.00470542	0.00274986	0.00259249	0.00354555	0.00416442	0.00433233	0.00273992	0.00228041	0.00344562
0.148	1.839e-05	0.00355488	-0.00012236	0.00133487	0.00186667	0.0120777	-0.00175054	0.00126881	0.00598777	0.00396468	0.00420896	0.00484887	0.00361055	0.0046015	0.00260503	0.00252732	0.00345975	0.00440088	0.00421786	0.00270864	0.0021502	0.00345739
0.149	5.6253e-05	0.00333319	-0.000261754	0.000852734	0.002153	0.0119078	-0.00140455	0.000932203	0.00542332	0.00416219	0.0041701	0.00473101	0.00373219	0.00446071	0.00248782	0.00245053	0.00337308	0.00464475	0.00410133	0.00268142	0.00207084	0.00349027
0.15	0.000134068	0.00316644	-0.000374447	0.000428327	0.00248944	0.0116142	-0.000969501	0.000625887	0.00478472	0.00428055	0.00412616	0.00462083	0.00388504	0.00429399	0.00241245	0.00235052	0.00328347	0.00489359	0.00398782	0.00266339	0.00205148	0.00354219
0.151	0.000243316	0.00305878	-0.00046163	4.04784e-05	0.00284718	0.0111867	-0.000467203	0.000353203	0.00409588	0.00430791	0.00405951	0.00453445	0.00407572	0.00411293	0.00238907	0.00222149	0.00318922	0.00514137	0.00388154	0.00265619	0.00208869	0.00360775
0.152	0.000373088	0.0030083	-0.000525699	-0.00033481	0.00319506	0.0106193	7.52462e-05	0.000115765	0.00338397	0.00423778	0.00395228	0.00448498	0.00430482	0.00392865	0.00241931	0.00206385	0.00308983	0.00537841	0.00378499	0.00265726	0.0021682	0.00367873
0.153	0.000512334	0.00300694	-0.000569761	-0.000722239	0.00350203	0.00991163	0.000627636	-8.67337e-05	0.00267729	0.00406944	0.00378811	0.00447881	0.0045656	0.0037507	0.00249476	0.00188392	0.00298741	0.00559242	0.00369842	0.0026605	0.00227119	0.00374518
0.154	0.000650788	0.00304162	-0.000597335	-0.00114463	0.00373985	0.00906946	0.0011589	-0.000256515	0.00200337	0.00380799	0.00355345	0.00451375	0.00484502	0.00358602	0.00259977	0.00169379	0.00288786	0.00577014	0.00361976	0.00265793	0.00238075	0.00379732
0.155	0.000779229	0.00309578	-0.000612282	-0.00162054	0.00388535	0.00810449	0.00163957	-0.00039715	0.00138744	0.00346366	0.0032383	0.00458024	0.005126	0.00343803	0.0027164	0.00151141	0.00280161	0.00589926	0.00354494	0.00264166	0.00248565	0.00382743
0.156	0.000890736	0.00315075	-0.000618277	-0.00216252	0.00392239	0.00703433	0.00204408	-0.000513297	0.000850742	0.00305111	0.00283727	0.00466392	0.00538993	0.00330648	0.00282902	0.00136055	0.00274316	0.00597021	0.0034687	0.00260593	0.0025813	0.00383173
0.157	0.0009813	0.00318723	-0.000618364	-0.00277571	0.00384311	0.00588204	0.00235269	-0.000610293	0.000409168	0.00258834	0.00235005	0.0047491	0.00561888	0.00318782	0.002927	0.00126814	0.00272849	0.0059776	0.00338565	0.00254854	0.00266882	0.00381165
0.158	0.00105123	0.00318435	-0.00061474	-0.00345626	0.00364965	0.00467586	0.00255299	-0.000692445	7.20352e-05	0.0020948	0.00178309	0.00482153	0.00579693	0.00307721	0.00300515	0.00125569	0.00277031	0.00592157	0.00329164	0.00247132	0.00275226	0.0037745
0.159	0.00110207	0.00312884	-0.000607626	-0.00419364	0.00335073	0.00344563	0.00264124	-0.000766099	-0.000157693	0.0015921	0.00114492	0.00487048	0.00591232	0.00296692	0.00306579	0.00132593	0.00287231	0.00580684	0.00318324	0.00238147	0.0028377	0.00373288
0.16	0.00113917	0.0030087	-0.000595824	-0.0049691	0.0029641	0.00222385	0.00262148	-0.000836084	-0.000283753	0.00110123	0.000450137	0.00488855	0.00595699	0.00285029	0.00311452	0.00146159	0.00302707	0.00564328	0.00305938	0.00228945	0.00292867	0.00370282
0.161	0.00117043	0.00281619	-0.000576262	-0.00575751	0.00251408	0.0010431	0.00250561	-0.00090602	-0.000316089	0.00064175	-0.000282896	0.00487176	0.00592698	0.00272224	0.00315917	0.00163727	0.00321767	0.00544474	0.00292151	0.00220806	0.0030246	0.00370024
0.162	0.00120519	0.00254861	-0.000544122	-0.0065288	0.00202963	-6.57279e-05	0.00231232	-0.000977655	-0.000269628	0.000230508	-0.00103302	0.00481914	0.00582233	0.00258008	0.00320738	0.00182995	0.00342209	0.00522745	0.00277374	0.00215023	0.00312043	0.00373659
0.163	0.00125416	0.00220806	-0.000492717	-0.0072507	0.00154177	-0.00107496	0.00206575	-0.00105164	-0.000163006	-0.000118799	-0.00177794	0.00473166	0.0056466	0.00242446	0.00326439	0.0020219	0.00361796	0.00500796	0.00262332	0.00212661	0.00320748	0.00381533
0.164	0.00132848	0.0018012	-0.000413896	-0.00789101	0.00108125	-0.00196162	0.00179315	-0.00112742	-1.6831e-05	-0.000395922	-0.00249549	0.00461202	0.00540653	0.00226031	0.00333162	0.00220016	0.00378591	0.00480102	0.00248096	0.00214367	0.00327538	0.00393083
0.165	0.00143817	0.00133894	-0.000298771	-0.00841936	0.000676304	-0.00270883	0.00152283	-0.00120235	0.000148273	-0.000594975	-0.00316477	0.00446544	0.00511161	0.00209791	0.00340656	0.00235548	0.00391162	0.00461772	0.00236088	0.00220318	0.00331497	0.00407042
0.166	0.00159173	0.000835445	-0.000138226	-0.00880971	0.000350412	-0.00330653	0.00128199	-0.00127235	0.000313397	-0.000714348	-0.00376764	0.00430009	0.00477379	0.00195408	0.00348407	0.00248178	0.00398693	0.00446442	0.00227989	0.00230329	0.00332028	0.00421832
0.167	0.00179541	0.000307048	7.63637e-05	-0.00904218	0.000120607	-0.00375197	0.00109469	-0.00133211	0.000462971	-0.000756558	-0.00428985	0.00412793	0.00440716	0.00185215	0.0035582	0.00257611	0.0040103	0.00434294	0.00225463	0.00244012	0.0032899	0.0043595
0.168	0.00205353	-0.000228676	0.000353155	-0.00910383	-3.46877e-06	-0.00404871	0.00097931	-0.00137693	0.00058616	-0.000727883	-0.0047211	0.00396512	0.00402718	0.00181852	0.00362419	0.00263909	0.00398645	0.00425238	0.00229607	0.00260879	0.00322774	0.00448296
0.169	0.00236618	-0.000754884	0.000696964	-0.00899071	-2.03436e-05	-0.0042081	0.000948699	-0.00139969	0.000677639	-0.00063816	-0.00505755	0.00383152	0.00365266	0.0018722	0.00367884	0.00267489	0.0039261	0.00418982	0.0024061	0.00280253	0.00314236	0.00458197
0.17	0.00273044	-0.00125515	0.00111006	-0.00870848	6.34443e-05	-0.00424775	0.00100917	-0.00139354	0.000737991	-0.000499855	-0.00530106	0.00374732	0.00330453	0.00201573	0.00372111	0.00269059	0.00384374	0.00415196	0.00257659	0.00301275	0.00304534	0.00465483
0.171	0.00314124	-0.00171485	0.00159193	-0.00827074	0.000234367	-0.00418896	0.00115951	-0.00135283	0.000773273	-0.000326856	-0.00545793	0.0037283	0.00300425	0.00223499	0.00375186	0.00269607	0.00375491	0.00413673	0.00279113	0.00322875	0.00294928	0.00470431
0.172	0.00359089	-0.00212176	0.00213859	-0.00769874	0.000473188	-0.00405587	0.00139151	-0.00127277	0.000794667	-0.000134227	-0.00553891	0.00378049	0.00277178	0.002507	0.00377263	0.00270241	0.00367303	0.00414267	0.00302976	0.00343794	0.00286491	0.00473581
0.173	0.00407005	-0.00246655	0.00274236	-0.00701991	0.000756985	-0.00387345	0.00169087	-0.0011508	0.000816891	6.28012e-05	-0.00555858	0.00389736	0.00262073	0.00280817	0.00378466	0.00271998	0.00360639	0.00416818	0.00327223	0.00362698	0.00279845	0.00475567
0.174	0.00456807	-0.0027431	0.00339193	-0.00626628	0.00106113	-0.00366577	0.00203817	-0.000986962	0.000856942	0.000249593	-0.00553405	0.00406185	0.00255288	0.00311828	0.00378827	0.00275613	0.00355638	0.00421078	0.00349989	0.00378352	0.00275054	0.00476955
0.175	0.00507336	-0.0029482	0.00407277	-0.00547245	0.00136132	-0.00345447	0.0024104	-0.000783293	0.000932643	0.000412445	-0.00548335	0.00425169	0.00255596	0.00342136	0.00378295	0.00281348	0.00351795	0.00426693	0.00369687	0.00389828	0.00271755	0.0047816
0.176	0.0055742	-0.00308144	0.00476775	-0.00467353	0.00163577	-0.00325717	0.0027827	-0.000544433	0.00106063	0.000539256	-0.00542415	0.00444491	0.00260743	0.00370556	0.00376816	0.00288941	0.00348233	0.00433265	0.00385057	0.00396695	0.00269432	0.00479426
0.177	0.00605947	-0.00314474	0.00545787	-0.00390313	0.00186698	-0.00308638	0.0031302	-0.000277578	0.0012546	0.000619969	-0.00537234	0.00462386	0.00268158	0.00396283	0.00374444	0.00297703	0.00344083	0.00440463	0.00395197	0.00399173	0.00267742	0.00480894
0.178	0.00651965	-0.00314181	0.00612298	-0.00319132	0.00204316	-0.00294862	0.00342912	7.12146e-06	0.0015238	0.000646857	-0.00534018	0.00477729	0.00275529	0.00418839	0.00371448	0.00306708	0.00338844	0.0044814	0.00399587	0.00398221	0.00266743	0.0048271
0.179	0.00694803	-0.00307795	0.00674179	-0.0025626	0.00215943	-0.00284353	0.00365758	0.000297429	0.00187185	0.000614886	-0.00533523	0.00490079	0.00281058	0.0043802	0.00368381	0.00315029	0.0033261	0.00456408	0.00398056	0.00395494	0.00266926	0.00485122
0.18	0.00733612	-0.00295927	0.00729726	-0.00203749	0.00221726	-0.00276725	0.00380226	0.000581972	0.00229733	0.000520799	-0.00536385	0.00499477	0.00283645	0.00453989	0.00365856	0.00321645	0.00326127	0.00465634	0.00391018	0.00393039	0.00268836	0.00488307
0.181	0.00768	-0.00279237	0.00777325	-0.00162843	0.00222461	-0.00270966	0.00385326	0.000847392	0.00279117	0.000365012	-0.00542432	0.00506371	0.00282655	0.00467054	0.00364503	0.00325813	0.00320594	0.00476325	0.00379194	0.00392924	0.00272913	0.00492556
0.182	0.00797841	-0.00258391	0.00815675	-0.00134073	0.00219519	-0.00265636	0.00380659	0.00108091	0.00333845	0.000150688	-0.00550941	0.0051135	0.00277909	0.00477645	0.00364664	0.00327011	0.0031734	0.00488946	0.00363681	0.00396619	0.00279045	0.00498052
0.183	0.00823244	-0.00234062	0.00843863	-0.0011726	0.00214701	-0.00259073	0.00366435	0.00127022	0.003919	-0.000116729	-0.00560703	0.00514915	0.00269639	0.00486222	0.00366165	0.0032496	0.00317327	0.00503705	0.00345865	0.00404474	0.00286403	0.00504714
0.184	0.00844523	-0.00206939	0.00861393	-0.00111577	0.00210062	-0.00249588	0.00343412	0.00140438	0.00450913	-0.000429802	-0.00570102	0.00517306	0.00258477	0.00493196	0.00368219	0.00319637	0.00320707	0.00520388	0.00327329	0.00415554	0.00293561	0.00512097
0.185	0.00862197	-0.00177678	0.00868208	-0.00115628	0.00207752	-0.00235541	0.0031284	0.00147564	0.00508359	-0.000779298	-0.00577214	0.00518433	0.00245456	0.00498859	0.00369526	0.00311291	0.0032669	0.00538299	0.00309743	0.0042794	0.00298825	0.0051938
0.186	0.00876933	-0.00146931	0.00864683	-0.0012756	0.00209823	-0.00215541	0.00276358	0.00147953	0.00561741	-0.00115477	-0.00579967	0.00517925	0.00232035	0.00503337	0.00368525	0.00300482	0.00333725	0.00556332	0.00294666	0.00439279	0.00300667	0.00525456
0.187	0.00889491	-0.0011535	0.00851583	-0.00145181	0.00218049	-0.00188585	0.00235885	0.00141532	0.00608785	-0.00154506	-0.00576291	0.0051528	0.00220071	0.00506586	0.00363709	0.00288124	0.00339931	0.00573128	0.00283317	0.00447367	0.0029812	0.0052911
0.188	0.00900665	-0.000835983	0.00830002	-0.00166102	0.00233777	-0.00154167	0.00193477	0.00128625	0.00647618	-0.00193877	-0.00564285	0.00510048	0.00211637	0.00508411	0.00353934	0.00275521	0.00343543	0.00587284	0.00276374	0.0045059	0.00291122	0.00529221
0.189	0.00911224	-0.000523678	0.00801054	-0.00187852	0.00257937	-0.0011244	0.00151075	0.00109798	0.00676884	-0.00232594	-0.00542256	0.00502	0.00208588	0.00508486	0.00338707	0.00264353	0.0034333	0.00597446	0.002738	0.00448246	0.00280906	0.00525009
0.19	0.00921821	-0.000223407	0.00766342	-0.00208076	0.00290632	-0.000639512	0.00110753	0.000862928	0.00695972	-0.00269545	-0.00509198	0.00491234	0.00211849	0.00506506	0.00318241	0.00256457	0.00338547	0.00602731	0.00275112	0.00440505	0.00269808	0.00516021
0.191	0.0093297	5.83812e-05	0.00727535	-0.00224582	0.00331351	-9.87203e-05	0.000742673	0.00059562	0.0070488	-0.00303783	-0.0046456	0.00478159	0.00221043	0.00502175	0.00293632	0.00253401	0.00329205	0.00602619	0.00279457	0.00428493	0.00261461	0.00502356
0.192	0.00944995	0.000315678	0.00686173	-0.0023542	0.00378997	0.000481312	0.000429992	0.000313143	0.00704277	-0.00334509	-0.00408374	0.00463425	0.00234623	0.00495277	0.00266952	0.00256018	0.00316039	0.00596991	0.00285864	0.00414163	0.00260039	0.00484666
0.193	0.00957998	0.000543324	0.00643656	-0.00239023	0.00431902	0.00107985	0.000179172	3.36762e-05	0.00695392	-0.0036111	-0.00341292	0.00447762	0.00250441	0.00485741	0.00241202	0.0026404	0.00300379	0.00586138	0.00293434	0.00399939	0.00268674	0.0046407
0.194	0.00971816	0.00073714	0.00601177	-0.00234278	0.0048793	0.00167318	-4.83193e-06	-0.000224615	0.00679878	-0.00383178	-0.00264544	0.00431806	0.00266348	0.00473675	0.00220053	0.00276171	0.00283987	0.00570704	0.00301421	0.00388224	0.00287903	0.0044201
0.195	0.00986009	0.000894576	0.0055965	-0.00220528	0.00544639	0.00223682	-0.000121673	-0.000443502	0.0065973	-0.00400493	-0.00179917	0.00415946	0.00280555	0.00459404	0.00207035	0.00290531	0.00268799	0.00551605	0.00309269	0.00380787	0.00315557	0.00420053
0.196	0.00999877	0.00101502	0.00519667	-0.00197615	0.00599426	0.00274684	-0.000175579	-0.000606351	0.00637057	-0.00413036	-0.000896436	0.004003	0.00291798	0.00443488	0.00204024	0.00305179	0.00256572	0.00529916	0.00316564	0.0037824	0.00348055	0.00399627
0.197	0.0101249	0.00110006	0.00481482	-0.00165876	0.00649683	0.00318134	-0.00017494	-0.000699118	0.00613894	-0.00420977	3.73349e-05	0.00384819	0.00299408	0.00426705	0.00210107	0.00318497	0.00248521	0.00506768	0.00323011	0.00379906	0.003818	0.00381741
0.198	0.0102274	0.00115361	0.0044502	-0.00126129	0.00692956	0.00352181	-0.000131659	-0.000711207	0.00592014	-0.00424662	0.000975069	0.00369519	0.00303311	0.00410014	0.00222199	0.00329395	0.00245059	0.00483242	0.00328399	0.00384155	0.00413937	0.00366788
0.199	0.0102943	0.00118124	0.00409851	-0.000795593	0.00727148	0.00375332	-6.1033e-05	-0.000636253	0.00572778	-0.00424666	0.00189021	0.00354736	0.00304001	0.00394441	0.00236819	0.00337389	0.00245836	0.00460239	0.00332572	0.00389033	0.00442602	0.00354516
0.2	0.0103137	0.00119105	0.0037532	-0.000277695	0.00750571	0.00386682	2.03708e-05	-0.000472438	0.00557046	-0.00421666	0.00275709	0.00341421	0.00302449	0.00380932	0.00251357	0.0034257	0.00249988	0.0043849	0.00335455	0.00392854	0.00466832	0.00344107
0.201	0.0102731	0.00119347	0.00340705	0.000271933	0.00761864	0.00386057	9.75971e-05	-0.000221679	0.00545013	-0.0041617	0.00355236	0.003313	0.00299855	0.00370138	0.00264392	0.00345441	0.00256572	0.00418613	0.00337137	0.00394503	0.00486471	0.00334433
0.202	0.010162	0.00119941	0.00305134	0.000832544	0.00760339	0.00373692	0.000154558	0.000109208	0.00536254	-0.00408867	0.00425777	0.00326419	0.00297457	0.0036225	0.00275541	0.00346851	0.0026479	0.00400879	0.00337767	0.00393591	0.00502001	0.00324452
0.203	0.00997267	0.00121968	0.00267741	0.00138247	0.00745877	0.00350334	0.000176756	0.000509303	0.00529752	-0.00400416	0.00486001	0.00328579	0.00296198	0.00356891	0.00285098	0.00347749	0.00274029	0.00385295	0.00337574	0.0039037	0.00514247	0.00313383
0.204	0.00970016	0.00126352	0.00227803	0.00190012	0.00718915	0.00317165	0.000152207	0.000964072	0.00524	-0.00391388	0.00535111	0.00338552	0.00296463	0.00353163	0.00293632	0.00348965	0.00283773	0.00371612	0.00336826	0.00385527	0.00524096	0.00300813
0.205	0.00934361	0.00133865	0.00184752	0.00236576	0.00680411	0.00275728	7.26363e-05	0.00145681	0.00517194	-0.003823	0.00572915	0.00355621	0.00298	0.00349859	0.00301582	0.00351033	0.0029347	0.00359344	0.00335816	0.00379911	0.00532248	0.00286725
0.206	0.00890641	0.00144994	0.00138267	0.00276234	0.00631766	0.00227813	-6.59626e-05	0.00196941	0.00507393	-0.00373565	0.00599766	0.00377768	0.00300046	0.00345716	0.00309016	0.00354118	0.00302458	0.00347813	0.00334798	0.00374296	0.00539055	0.00271439
0.207	0.00839626	0.00159877	0.000883235	0.00307648	0.00574729	0.00175339	-0.000262913	0.0024834	0.00492717	-0.00365474	0.00616504	0.00402321	0.00301607	0.00339664	0.00315566	0.00358077	0.00309968	0.00336225	0.00333939	0.00369222	0.00544489	0.00255528
0.208	0.00782503	0.00178246	0.000352237	0.00329929	0.00511292	0.00120246	-0.00051274	0.00298092	0.00471539	-0.00358194	0.00624359	0.00426637	0.00301794	0.00331014	0.00320539	0.00362611	0.00315216	0.0032377	0.00333275	0.00364977	0.00548249	0.00239729
0.209	0.00720817	0.0019941	-0.000203968	0.00342702	0.00443575	0.000643887	-0.000805355	0.00344574	0.00442659	-0.00351772	0.00624837	0.00448552	0.00300097	0.00319564	0.00323141	0.00367444	0.00317532	0.00309735	0.00332698	0.0036172	0.00549957	0.00224854
0.21	0.00656693	0.00222313	-0.000775546	0.00346409	0.00373855	9.41383e-05	-0.00112708	0.0038646	0.00405567	-0.0034647	0.00619533	0.00466608	0.00296607	0.0030564	0.00322757	0.00372432	0.00316466	0.00293584	0.00331863	0.00359744	0.00549335	0.0021163
0.211	0.00591829	0.00245437	-0.00135016	0.00341469	0.00304006	-0.000431269	-0.00145953	0.00422569	0.00360189	-0.00341789	0.0061019	0.00480166	0.00291881	0.00290027	0.00319004	0.00377709	0.00311995	0.00275277	0.00330547	0.00359467	0.00546474	0.0020088
0.212	0.00528203	0.00267062	-0.00191333	0.00329039	0.00235866	-0.000920982	-0.00178311	0.0045209	0.0030721	-0.00337487	0.0059837	0.00489224	0.00287002	0.00273906	0.00311967	0.00383485	0.00304479	0.002552	0.00328394	0.00361668	0.00541862	0.00193202
0.213	0.00467724	0.00285346	-0.00244879	0.0031072	0.00171018	-0.00136673	-0.00207789	0.00474511	0.00247951	-0.00333285	0.00585405	0.00494344	0.00283284	0.00258681	0.00302142	0.00389934	0.0029468	0.00234445	0.00325086	0.00367297	0.00536337	0.00188944
0.214	0.00412013	0.00298431	-0.00293875	0.00288424	0.00110719	-0.00176293	-0.00232502	0.00489582	0.0018424	-0.00328825	0.00572291	0.00496463	0.00281898	0.00245747	0.00290347	0.00397029	0.00283658	0.00215049	0.00320432	0.00377157	0.00530903	0.00188149
0.215	0.00362325	0.00304609	-0.00336571	0.00264266	0.000558545	-0.00210692	-0.00250756	0.0049731	0.00118356	-0.00323822	0.0055968	0.00496638	0.00283513	0.00236268	0.00277542	0.00404423	0.00272611	0.00200159	0.00314447	0.00391528	0.00526478	0.00190542
0.216	0.00319439	0.00302465	-0.00371309	0.0024041	6.91562e-05	-0.00239838	-0.00261203	0.00497893	0.000528213	-0.0031804	0.00547831	0.00495806	0.00288081	0.00230977	0.00264654	0.00411425	0.00262629	0.00193692	0.00307426	0.00409932	0.00523585	0.00195615
0.217	0.00283596	0.00291016	-0.00396603	0.00218918	-0.000359964	-0.00263875	-0.00262959	0.00491665	-9.79997e-05	-0.00311312	0.00536621	0.00494595	0.00294913	0.00230126	0.00252431	0.00417094	0.00254442	0.00198921	0.00299976	0.00431145	0.00522134	0.00202753
0.218	0.00254467	0.0026982	-0.00411227	0.00201604	-0.000731515	-0.00283063	-0.00255692	0.0047903	-0.00067101	-0.00303555	0.0052558	0.00493247	0.00302973	0.002336	0.00241409	0.00420404	0.00248249	0.00216614	0.00293003	0.00453435	0.00521364	0.00211367
0.219	0.00231177	0.00239054	-0.00414281	0.00189895	-0.0010515	-0.0029773	-0.00239672	0.00460407	-0.00117024	-0.00294783	0.00513955	0.00491654	0.00311259	0.00241116	0.00232009	0.00420433	0.00243718	0.00244725	0.00287622	0.00474888	0.00519975	0.00220983
0.22	0.00212601	0.00199507	-0.00405298	0.00184799	-0.0013291	-0.00308154	-0.00215829	0.00436212	-0.00157909	-0.00285228	0.00500739	0.00489468	0.00319115	0.00252343	0.00224727	0.00416571	0.00240204	0.00279785	0.00284968	0.00493788	0.00516413	0.00231266
0.221	0.0019695	0.00152631	-0.0038409	0.00186688	-0.00157534	-0.00314601	-0.00185611	0.00406736	-0.00188819	-0.00275132	0.0048491	0.00486381	0.00326349	0.00266941	0.00220293	0.00408538	0.00236994	0.00318544	0.0028591	0.00508706	0.0050912	0.00242005
0.222	0.00182049	0.00100467	-0.00350997	0.00195225	-0.00180153	-0.00317388	-0.00150921	0.00372234	-0.00209631	-0.00264668	0.00465464	0.00482218	0.00333167	0.00284404	0.00219705	0.00396473	0.00233537	0.00358358	0.00290784	0.00518693	0.00496848	0.00253005
0.223	0.00165825	0.000455272	-0.00306786	0.00209559	-0.00201966	-0.00316716	-0.00114131	0.00332871	-0.00220865	-0.00254165	0.00441457	0.00476981	0.0034006	0.00303968	0.00223862	0.0038099	0.0022964	0.00397093	0.00299258	0.0052339	0.00478878	0.00264038
0.224	0.00146292	-9.33731e-05	-0.00252608	0.00228371	-0.00224158	-0.00312729	-0.0007784	0.00288705	-0.00223657	-0.00243973	0.00412109	0.00470844	0.00347551	0.00324589	0.00233072	0.0036308	0.00225493	0.00433086	0.0031041	0.00522989	0.00455101	0.0027476
0.225	0.0012174	-0.000611504	-0.00189984	0.00249854	-0.00247751	-0.00305512	-0.000447195	0.00239769	-0.00219716	-0.00234492	0.00376929	0.00464045	0.00355938	0.00345015	0.00246728	0.00344004	0.00221587	0.00465067	0.00322963	0.00518163	0.00426066	0.00284697
0.226	0.00090907	-0.00107007	-0.00120735	0.00271901	-0.00273551	-0.002951	-0.000173238	0.00186109	-0.00211144	-0.00226122	0.00335743	0.0045672	0.00365124	0.00363946	0.0026331	0.00325168	0.00218552	0.00492126	0.00335569	0.00509943	0.00392957	0.00293255
0.227	0.000531151	-0.00144276	-0.000469024	0.00292269	-0.00302082	-0.00281497	2.09673e-05	0.00127838	-0.00200249	-0.00219235	0.00288733	0.00448773	0.00374585	0.00380219	0.00280743	0.00308004	0.00216966	0.00513708	0.00347038	0.00499562	0.00357544	0.00299782
0.228	8.36895e-05	-0.00170794	0.00029335	0.00308748	-0.00333537	-0.00264691	0.000117628	0.000651858	-0.00189347	-0.00214147	0.00236434	0.00439796	0.0038348	0.00392996	0.00296851	0.00293847	0.00217206	0.00529606	0.00356485	0.00488265	0.00322078	0.00303655
0.229	-0.000426022	-0.00185027	0.00105753	0.00319343	-0.00367751	-0.00244678	0.000105051	-1.45564e-05	-0.00180561	-0.00211094	0.00179717	0.00429111	0.00390855	0.00401917	0.00309733	0.00283846	0.00219403	0.00539959	0.00363395	0.00477118	0.00289133	0.00304379
0.23	-0.000982975	-0.00186201	0.00180136	0.00322401	-0.00404217	-0.00221468	-2.08104e-05	-0.000714935	-0.00175651	-0.00210231	0.00119714	0.00415894	0.00395862	0.00407209	0.00318028	0.00278881	0.00223509	0.00545199	0.00367613	0.00466874	0.00261286	0.00301675
0.231	-0.00156494	-0.00174333	0.00250355	0.00316774	-0.00442244	-0.0019497	-0.000254663	-0.0014412	-0.00175868	-0.00211673	0.000577522	0.00399357	0.00397965	0.00409716	0.00321051	0.00279479	0.00229441	0.00545994	0.00369275	0.00457876	0.00240595	0.00295552
0.232	-0.00214833	-0.00150318	0.00314782	0.00302013	-0.00480451	-0.00165386	-0.000588861	-0.00218306	-0.00181816	-0.00215137	-4.53041e-05	0.00379133	0.0039695	0.00410793	0.00318866	0.00285666	0.00237089	0.00543257	0.00368857	0.0044992	0.00227872	0.00286367
0.233	-0.0027039	-0.00115784	0.00371906	0.00278233	-0.00517368	-0.00132933	-0.00100654	-0.00292861	-0.00193523	-0.0022031	-0.000655371	0.0035526	0.00393031	0.00412223	0.00312296	0.00296952	0.00246491	0.0053788	0.00366907	0.00442592	0.00222331	0.0027484
0.234	-0.00320137	-0.000729382	0.00420529	0.00246273	-0.005514	-0.000979532	-0.00148515	-0.00366508	-0.00210292	-0.00226751	-0.00123642	0.00328447	0.00386793	0.00415885	0.00302864	0.00312303	0.00257719	0.00530659	0.00363988	0.00435365	0.00221906	0.00262042
0.235	-0.00361164	-0.000245136	0.00459848	0.00207501	-0.00580863	-0.000608854	-0.00199801	-0.00437899	-0.00230926	-0.00233861	-0.00177375	0.00300204	0.00379077	0.00423385	0.00292524	0.00330249	0.00270774	0.00522181	0.00360605	0.00427737	0.00224182	0.00249367
0.236	-0.00390907	0.000264659	0.00489459	0.00163779	-0.00604121	-0.000222601	-0.00251622	-0.00505693	-0.0025378	-0.00240906	-0.00225459	0.00272912	0.00370833	0.00435718	0.0028334	0.00349047	0.00285477	0.00512761	0.0035716	0.00419405	0.00227269	0.00238422
0.237	-0.00407358	0.000769012	0.0050936	0.00117322	-0.00619693	0.000173107	-0.00301067	-0.00568637	-0.00276911	-0.00247031	-0.00266873	0.00249722	0.00362965	0.00453089	0.00277012	0.00366874	0.00301419	0.00502439	0.00353971	0.00410366	0.00230223	0.00230827
0.238	-0.00409248	0.00123841	0.00519928	0.00070531	-0.00626362	0.000571471	-0.00345414	-0.00625638	-0.00298246	-0.00251295	-0.00300902	0.00234032	0.00356203	0.0047497	0.00274432	0.00382018	0.00317995	0.00491049	0.0035131	0.00400956	0.00233057	0.00227903
0.239	-0.00396168	0.00164695	0.00521879	0.000258124	-0.0062327	0.000965181	-0.00382323	-0.00675827	-0.00315764	-0.00252703	-0.0032716	0.00228301	0.0035103	0.00500323	0.002755	0.00393051	0.003345	0.00478325	0.0034947	0.00391821	0.00236495	0.00230343
0.24	-0.00368634	0.0019741	0.0051621	-0.000146039	-0.00609991	0.0013466	-0.00410001	-0.0071861	-0.00327668	-0.00250255	-0.00345601	0.00232706	0.00347696	0.00527862	0.00279317	0.00398975	0.00350251	0.00464032	0.0034878	0.0038379	0.00241556	0.00238022
0.241	-0.00328144	0.00220524	0.00503973	-0.000491703	-0.00586805	0.00170688	-0.00427083	-0.00753719	-0.00332587	-0.00243026	-0.00356656	0.00244918	0.00346284	0.00556297	0.00284673	0.00399347	0.00364707	0.00448079	0.00349543	0.00377648	0.00249024	0.00250042
0.242	-0.00276966	0.0023351	0.00486613	-0.0007622	-0.00554117	0.00204006	-0.00433334	-0.00781094	-0.00329522	-0.0023011	-0.00360769	0.00261369	0.00346785	0.0058427	0.00290469	0.00394324	0.00377465	0.00430556	0.00352055	0.00374025	0.00259141	0.00265134
0.243	-0.00218046	0.00236562	0.00465601	-0.000948248	-0.00512864	0.00233906	-0.0042926	-0.00801002	-0.0031811	-0.00210806	-0.00358702	0.00278648	0.00349129	0.00610515	0.00296017	0.00384717	0.00388399	0.00411783	0.00356347	0.00373073	0.00271297	0.00281905
0.244	-0.00154857	0.00230717	0.00442289	-0.00104779	-0.00464535	0.00259696	-0.00415982	-0.00814043	-0.00298509	-0.00184628	-0.00351467	0.00294216	0.00353192	0.00633828	0.00301062	0.00371968	0.00397591	0.00392315	0.00362081	0.00374291	0.00284214	0.0029904
0.245	-0.0009113	0.0021761	0.00417907	-0.00106574	-0.00410968	0.00280712	-0.00395283	-0.00820981	-0.00271488	-0.00151356	-0.00340207	0.00306541	0.00358733	0.00653047	0.00305634	0.00358037	0.0040524	0.00372895	0.00368549	0.00376646	0.00296297	0.00315414
0.246	-0.00030593	0.00199407	0.00393495	-0.00101316	-0.00354267	0.00296377	-0.00369432	-0.00822692	-0.00238311	-0.00111072	-0.00326114	0.00314992	0.0036535	0.00667073	0.00309805	0.00345188	0.00411576	0.00354445	0.00374758	0.00378755	0.00306013	0.00330135
0.247	0.000232961	0.00178622	0.00369845	-0.000906425	-0.00296681	0.00306232	-0.00340994	-0.00820065	-0.00200619	-0.000641817	-0.00310361	0.0031968	0.00372458	0.00674951	0.00313455	0.00335629	0.00416775	0.00338065	0.00379594	0.00379151	0.0031221	0.00342592
0.248	0.000675943	0.00157914	0.00347466	-0.000765865	-0.00240474	0.00309961	-0.00312626	-0.00813921	-0.00160301	-0.000114271	-0.00294027	0.00321293	0.0037933	0.00675966	0.00316137	0.00331045	0.00420899	0.0032505	0.00382037	0.00376554	0.00314353	0.00352477
0.249	0.00100083	0.00139875	0.00326571	-0.000614216	-0.00187793	0.00307423	-0.00286857	-0.00804922	-0.00119344	0.000461269	-0.00278044	0.00320911	0.0038519	0.00669769	0.003171	0.00332194	0.00423884	0.00316839	0.00381364	0.00370074	0.00312669	0.00359811
0.25	0.00119421	0.0012683	0.00307084	-0.000474883	-0.00140548	0.00298661	-0.00265882	-0.00793507	-0.000796833	0.00107121	-0.00263149	0.00319794	0.00389333	0.00656486	0.0031544	0.00338764	0.00425581	0.00314848	0.00377316	0.00359343	0.0030822	0.00364929
0.251	0.00125211	0.00120588	0.00288655	-0.00037051	-0.0010035	0.00283884	-0.00251267	-0.00779848	-0.000431067	0.00169976	-0.00249886	0.00319115	0.00391231	0.00636802	0.00310321	0.00349599	0.00425818	0.00320133	0.00370228	0.00344553	0.00302815	0.00368406
0.252	0.00118051	0.00122394	0.00270724	-0.000321372	-0.000683962	0.00263589	-0.00243945	-0.00763833	-0.000110483	0.00233	-0.00238562	0.00319728	0.0039065	0.00611966	0.00301258	0.00363151	0.00424441	0.00332951	0.00361026	0.00326478	0.00298766	0.00370964
0.253	0.000994868	0.0013293	0.00252614	-0.000342218	-0.00045261	0.00238499	-0.00244386	-0.00745033	0.000155146	0.00294285	-0.00229098	0.00322044	0.00387695	0.00583678	0.00288348	0.00377867	0.00421424	0.00352556	0.00351113	0.00306461	0.0029842	0.00373332
0.254	0.000717962	0.00152118	0.0023356	-0.000442923	-0.000310077	0.00209407	-0.0025209	-0.00722819	0.000359251	0.00351913	-0.00221339	0.00325878	0.0038273	0.00554064	0.00272413	0.00392414	0.00416911	0.00377278	0.00342217	0.00286119	0.00303285	0.00376034
0.255	0.000378704	0.00179117	0.00212809	-0.000627743	-0.000252623	0.00177173	-0.00265797	-0.00696393	0.00049944	0.00404075	-0.00214949	0.00330606	0.00376363	0.00525354	0.00255111	0.00405747	0.00411161	0.00404826	0.00336016	0.0026716	0.0031349	0.00379245
0.256	9.52307e-06	0.00212439	0.00189701	-0.000894814	-0.000272049	0.00142725	-0.00283564	-0.00664878	0.000577247	0.00449159	-0.00209467	0.00335358	0.00369319	0.00499547	0.00238906	0.00417077	0.00404523	0.00432663	0.00333686	0.00251081	0.00327714	0.00382729
0.257	-0.000356283	0.00250065	0.0016375	-0.00123637	-0.000356466	0.00107022	-0.00302899	-0.00627414	0.000597547	0.00485854	-0.00204348	0.00339264	0.00362298	0.00478056	0.00226774	0.00425809	0.0039738	0.00458312	0.00335535	0.00238868	0.00343688	0.003859
0.258	-0.000687242	0.00289601	0.00134707	-0.00163935	-0.000491291	0.000710128	-0.00320935	-0.00583267	0.000567727	0.00513229	-0.00199024	0.00341648	0.00355841	0.00461467	0.00221448	0.00431484	0.00390092	0.00479592	0.0034091	0.00230865	0.00358898	0.00387979
0.259	-0.000956224	0.00328453	0.00102613	-0.00208643	-0.000660393	0.00035586	-0.00334636	-0.00531936	0.000496719	0.00530802	-0.00192945	0.00342166	0.00350236	0.00449549	0.00224339	0.00433774	0.00382949	0.00494784	0.00348445	0.002269	0.00371159	0.00388213
0.26	-0.00114259	0.00364019	0.000678278	-0.00255721	-0.000847302	1.53206e-05	-0.00341017	-0.00473235	0.000393985	0.00538575	-0.00185635	0.00340844	0.00345499	0.00441521	0.00234873	0.00432498	0.00376157	0.00502753	0.00356507	0.00226641	0.00378949	0.00386076
0.261	-0.00123383	0.00393871	0.000310361	-0.00302965	-0.00103643	-0.000304962	-0.00337366	-0.00407365	0.000268573	0.00537043	-0.00176719	0.00338048	0.00341425	0.00436479	0.00250922	0.00427678	0.00369844	0.00503033	0.00363627	0.00229945	0.00381552	0.00381424
0.262	-0.0012272	0.00415871	-6.64469e-05	-0.0034821	-0.00121557	-0.000600326	-0.00321471	-0.0033492	0.000129697	0.00527153	-0.00165879	0.00334316	0.00337727	0.00433855	0.00269989	0.00419605	0.00364122	0.00495847	0.00368791	0.00236945	0.00379034	0.0037448
0.263	-0.00112683	0.004284	-0.000440953	-0.00389344	-0.00137258	-0.000867037	-0.00291689	-0.00257018	-1.73171e-05	0.00510392	-0.00153061	0.00330323	0.00334121	0.00433354	0.00289793	0.00408824	0.00358991	0.00482152	0.00371561	0.00247923	0.00372287	0.00366051
0.264	-0.00094755	0.004305	-0.000798462	-0.00424551	-0.00149926	-0.00110376	-0.00247229	-0.00175131	-0.000169438	0.0048839	-0.00138344	0.00326565	0.00330376	0.00435097	0.00308873	0.00396173	0.00354482	0.00463543	0.00372078	0.00262876	0.00362648	0.00357164
0.265	-0.000710798	0.00421753	-0.00112325	-0.00452337	-0.00159168	-0.00131147	-0.0018818	-0.000910864	-0.000325502	0.00463042	-0.00121943	0.00323256	0.00326422	0.00439289	0.00326495	0.00382695	0.00350606	0.00442138	0.00370931	0.00281201	0.00351743	0.00348885
0.266	-0.000443389	0.00402371	-0.00139926	-0.00471642	-0.00164963	-0.00149284	-0.00115537	-6.97319e-05	-0.000486445	0.0043633	-0.00104189	0.00320256	0.00322337	0.00445869	0.00342492	0.00369501	0.00347351	0.00420352	0.00368952	0.00301632	0.00341117	0.00342023
0.267	-0.000175165	0.00373157	-0.00161109	-0.00481879	-0.0016764	-0.00165198	-0.000311714	0.000749726	-0.000654838	0.00410183	-0.000854917	0.00317149	0.00318317	0.00454271	0.00357057	0.00357568	0.0034467	0.00400579	0.00366965	0.00322418	0.00331907	0.00336874
0.268	6.35772e-05	0.00335436	-0.0017449	-0.00482951	-0.00167823	-0.00179386	0.000622609	0.00152494	-0.000834232	0.0038635	-0.00066301	0.00313453	0.00314647	0.0046338	0.00370531	0.00347535	0.00342501	0.00384803	0.00365552	0.0034164	0.0032462	0.00333115
0.269	0.000244695	0.00290948	-0.00178932	-0.00475224	-0.00166356	-0.00192388	0.00161454	0.00223446	-0.00102841	0.00366285	-0.000470617	0.00308877	0.00311675	0.00471702	0.00383246	0.00339555	0.00340789	0.00374235	0.00364895	0.00357526	0.00319143	0.00329904
0.27	0.000344635	0.00241718	-0.00173612	-0.0045948	-0.00164223	-0.00204724	0.00262633	0.00285927	-0.00124061	0.00351046	-0.000281749	0.00303577	0.00309808	0.00477666	0.00395428	0.00333272	0.00339529	0.00369125	0.0036474	0.00368709	0.00314985	0.00326161
0.271	0.00034649	0.00189922	-0.00158082	-0.00436837	-0.00162447	-0.00216842	0.00361767	0.0033839	-0.00147281	0.00341232	-9.96397e-05	0.00298306	0.00309504	0.00479934	0.00407182	0.00327942	0.00338794	0.00368877	0.00364498	0.00374398	0.00311642	0.00320903
0.272	0.000241185	0.00137661	-0.00132247	-0.00408557	-0.00162068	-0.00228928	0.00454773	0.00379777	-0.00172472	0.00336881	7.51353e-05	0.0029439	0.00311245	0.00477679	0.00418577	0.00322709	0.00338749	0.00372401	0.00363414	0.00374429	0.0030893	0.00313553
0.273	2.95787e-05	0.000869524	-0.000964657	-0.00376312	-0.00163973	-0.00241209	0.00537767	0.00409463	-0.00199397	0.00337686	0.000241607	0.00293448	0.00315519	0.00470648	0.00429658	0.00316733	0.00339578	0.00378485	0.00360819	0.00369369	0.00307075	0.00304126
0.274	-0.000278831	0.00039742	-0.000515475	-0.00341664	-0.00168729	-0.00253769	0.00607374	0.00427397	-0.00227684	0.00342842	0.000397766	0.00296871	0.00322643	0.00459141	0.00440553	0.00309327	0.00341344	0.0038605	0.00356251	0.00360377	0.00306645	0.00293327
0.275	-0.000666246	-2.41506e-05	1.38366e-05	-0.00306034	-0.00176728	-0.00266394	0.00660795	0.00434069	-0.00256706	0.00351208	0.000544356	0.00305214	0.003327	0.00444031	0.0045153	0.00300188	0.00343953	0.00394252	0.00349564	0.00348943	0.00308343	0.00282468
0.276	-0.0011077	-0.000383313	0.00060909	-0.00270662	-0.00188087	-0.00278669	0.00696011	0.00430461	-0.00285662	0.00361409	0.000682836	0.00317847	0.00345439	0.00426536	0.0046295	0.00289354	0.00347051	0.00402383	0.00340975	0.00336608	0.00312601	0.00273247
0.277	-0.00157294	-0.00067219	0.00125392	-0.00236542	-0.00202654	-0.00290007	0.00711907	0.00417973	-0.00313634	0.00371959	0.000815038	0.00333072	0.00360258	0.00407986	0.00475174	0.0027715	0.00350012	0.00409749	0.00331064	0.00324605	0.00319315	0.00267352
0.278	-0.00202869	-0.000886938	0.00193067	-0.00204379	-0.00220025	-0.00299675	0.0070833	0.00398321	-0.00339654	0.00381401	0.000942786	0.00348591	0.00376263	0.00389593	0.00488437	0.00264122	0.00352013	0.00415585	0.00320731	0.00313539	0.00327798	0.00265947
0.279	-0.00244124	-0.00102753	0.00262129	-0.00174567	-0.00239586	-0.00306851	0.00686098	0.0037342	-0.00362782	0.00388443	0.00106751	0.00362055	0.00392386	0.00372303	0.00502723	0.00250966	0.00352165	0.0041906	0.00311108	0.00303262	0.00337009	0.00269268
0.28	-0.00277901	-0.00109733	0.00330824	-0.00147204	-0.00260568	-0.00310676	0.00646945	0.00345258	-0.00382186	0.00392075	0.00118988	0.00371487	0.0040753	0.00356788	0.00517681	0.00238483	0.00349674	0.0041936	0.00303433	0.00293011	0.00345907	0.00276572
0.281	-0.00301501	-0.0011025	0.00397532	-0.00122111	-0.00282109	-0.00310324	0.00593413	0.00315764	-0.00397209	0.0039167	0.00130955	0.00375551	0.00420698	0.00343602	0.00532625	0.00227572	0.00344003	0.00415837	0.00298869	0.00281774	0.00353804	0.0028647
0.282	-0.00312958	-0.00105133	0.0046083	-0.000989018	-0.00303365	-0.00305079	0.00528696	0.00286696	-0.00407423	0.00387009	0.00142515	0.00373695	0.00431084	0.00333418	0.0054659	0.00219234	0.00335007	0.00408155	0.00298265	0.00268756	0.00360581	0.00297416
0.283	-0.00311231	-0.00095274	0.00519686	-0.000771607	-0.00323636	-0.00294373	0.00456389	0.00259666	-0.00412556	0.00378233	0.00153618	0.00366178	0.00438161	0.00327279	0.0055846	0.00214566	0.00323064	0.00396375	0.00301931	0.00253802	0.00366718	0.00308095
0.284	-0.00295775	-0.000818229	0.00573175	-0.000561792	-0.00341972	-0.0027787	0.0038049	0.00235692	-0.00412829	0.00366222	0.00163574	0.00353937	0.00441762	0.00326434	0.00567031	0.00214526	0.00308883	0.00381184	0.00309661	0.00237393	0.00373137	0.00317517
0.285	-0.00267275	-0.000658186	0.00620658	-0.00035311	-0.00357729	-0.0025545	0.00304884	0.00215492	-0.00408684	0.00352112	0.00171888	0.00338592	0.00442004	0.00331992	0.00571216	0.00219829	0.00293703	0.00363783	0.00320574	0.0022099	0.00380823	0.00325127
0.286	-0.00227344	-0.000482476	0.00661761	-0.000139877	-0.00370425	-0.00227275	0.0023321	0.00199362	-0.00400815	0.00337334	0.00178014	0.00322128	0.00439293	0.00344323	0.00570122	0.00230627	0.00279063	0.00345808	0.00333362	0.00206755	0.00390386	0.00330669
0.287	-0.00178421	-0.000300027	0.00696348	8.20319e-05	-0.00379756	-0.00193805	0.00168649	0.00187195	-0.00390119	0.003235	0.00181399	0.00306528	0.00434275	0.00362614	0.00563127	0.00246398	0.00266544	0.00329105	0.00346511	0.00196997	0.00401711	0.0033405
0.288	-0.001236	-0.00011856	0.00724491	0.000314531	-0.00385599	-0.00155799	0.0011373	0.00178516	-0.00377621	0.00312252	0.00181533	0.00293325	0.0042777	0.00384864	0.0054993	0.00266056	0.00257411	0.00315366	0.00358517	0.00193252	0.0041385	0.00335209
0.289	-0.000664266	5.55592e-05	0.00746424	0.000556832	-0.00387998	-0.00114294	0.000701874	0.00172553	-0.00364395	0.00305118	0.00177995	0.00283209	0.00420688	0.00408285	0.00530575	0.00288189	0.00252252	0.00305711	0.00368053	0.0019548	0.00425205	0.00334038
0.29	-0.000106585	0.000217358	0.00762494	0.000805176	-0.00387142	-0.000705729	0.000388699	0.00168316	-0.00351478	0.00303373	0.00170504	0.00275878	0.00413944	0.00429834	0.00505449	0.00311312	0.00250795	0.00300378	0.003741	0.00202094	0.00433905	0.00330372
0.291	0.000399825	0.000363204	0.00773109	0.00105279	-0.00383334	-0.000261076	0.000197035	0.00164689	-0.00339798	0.00307917	0.00158957	0.0027026	0.00408355	0.0044667	0.00475268	0.00334045	0.00252028	0.00298718	0.00376037	0.00210851	0.00438216	0.00324056
0.292	0.000820461	0.000490712	0.00778711	0.00128995	-0.00376959	0.000175024	0.000117241	0.00160515	-0.00330104	0.00319186	0.00143463	0.00264994	0.00404546	0.00456465	0.00441043	0.00355234	0.0025456	0.00299509	0.0037371	0.00219854	0.00436899	0.00315057
0.293	0.00112262	0.000598184	0.00779555	0.00150396	-0.00368611	0.00058534	0.000132148	0.00154634	-0.00322991	0.0033705	0.00124387	0.00258944	0.00402841	0.00457641	0.00404103	0.00374046	0.0025706	0.00301305	0.00367389	0.00228164	0.00429452	0.00303659
0.294	0.00128655	0.000685349	0.00776189	0.00168201	-0.0035862	0.000953808	0.00021688	0.00146168	-0.00318605	0.00360888	0.00102173	0.00251504	0.00403264	0.00449374	0.00365829	0.00389901	0.00258367	0.0030321	0.00357969	0.00235796	0.00416215	0.00290382
0.295	0.00129862	0.000752691	0.00768954	0.0018098	-0.00347345	0.00126613	0.000342714	0.00134353	-0.0031695	0.00389644	0.000775064	0.00242736	0.00405472	0.00431693	0.00327748	0.00402528	0.00257711	0.00304804	0.00346779	0.00243579	0.00398378	0.00276223
0.296	0.00115285	0.000801283	0.00758055	0.00187352	-0.00335163	0.00150984	0.000478108	0.00118661	-0.00317838	0.00421848	0.000512831	0.00233327	0.00408796	0.00405457	0.00291456	0.00411949	0.00254704	0.00306129	0.00335439	0.0025273	0.00377884	0.00262562
0.297	0.000852063	0.000832743	0.00743616	0.00186076	-0.00322395	0.00167532	0.000591482	0.000988231	-0.00320901	0.00455748	0.000245159	0.0022436	0.00412322	0.00372329	0.00258522	0.00418403	0.00249246	0.00307584	0.00325657	0.00264254	0.00357135	0.00250969
0.298	0.000407376	0.000849139	0.00725702	0.00176147	-0.00309309	0.00175642	0.000653679	0.000748269	-0.00325645	0.00489456	-1.72912e-05	0.00217036	0.00414988	0.0033473	0.00230419	0.00422268	0.00241454	0.00309688	0.00318901	0.00278461	0.0033855	0.00242841
0.299	-0.000162766	0.00085294	0.0070435	0.00156893	-0.0029611	0.00175082	0.00064027	0.00046901	-0.00331517	0.00521093	-0.000264	0.00212394	0.00415708	0.00295825	0.00208455	0.00423978	0.00231601	0.00312844	0.00316058	0.00294798	0.00323999	0.00238958
0.3	-0.000834048	0.000846971	0.00679592	0.00128052	-0.00282949	0.00166018	0.000533516	0.000154827	-0.00337972	0.00548949	-0.000485266	0.00211152	0.00413484	0.00259516	0.00193668	0.00423941	0.00220113	0.00317199	0.00317203	0.00312031	0.00314286	0.00239152
0.301	-0.00157807	0.000834394	0.00651494	0.000898239	-0.00269933	0.0014901	0.000323861	-0.000188249	-0.00344539	0.0057162	-0.000672825	0.00213727	0.00407508	0.0023029	0.00186673	0.00422476	0.00207598	0.0032263	0.00321621	0.00328636	0.00308988	0.00242342
0.302	-0.00236427	0.000818676	0.00620181	0.000429051	-0.00257123	0.00124975	1.08742e-05	-0.000553067	-0.00350871	0.00588122	-0.000820397	0.00220392	0.00397254	0.0021245	0.00187499	0.00419774	0.00194891	0.00328869	0.00328044	0.00343193	0.00306783	0.00246915
0.303	-0.00316312	0.000803714	0.00585845	-0.000115614	-0.00244649	0.000950813	-0.000395606	-0.000932331	-0.00356785	0.00597981	-0.000924936	0.00231401	0.0038253	0.00208338	0.00195548	0.00415927	0.00183092	0.00335619	0.00334989	0.00354642	0.00306053	0.00251221
0.304	-0.00394752	0.000794304	0.00548906	-0.000719911	-0.00232554	0.000606684	-0.000878083	-0.00131754	-0.00362249	0.00601216	-0.00098505	0.00246968	0.00363531	0.0021672	0.00209685	0.00410881	0.00173459	0.00342834	0.00341054	0.00362399	0.00305565	0.0025396
0.305	-0.00468873	0.000794163	0.0050974	-0.00136327	-0.00220625	0.000234715	-0.00141236	-0.00170059	-0.00367454	0.00598318	-0.00100075	0.00266961	0.00340906	0.00233711	0.00228346	0.00404434	0.0016706	0.00350849	0.00345107	0.00366457	0.00304913	0.00254443
0.306	-0.00536637	0.000807517	0.00468824	-0.00202259	-0.00208821	-0.000149178	-0.00196782	-0.00207389	-0.00372806	0.00590308	-0.000975322	0.0029074	0.00315745	0.00255054	0.00249833	0.0039639	0.00164434	0.00360136	0.00346286	0.00367183	0.00304256	0.00252598
0.307	-0.00596593	0.000838582	0.00426707	-0.00267308	-0.0019708	-0.000530019	-0.00251039	-0.00243048	-0.00378844	0.00578569	-0.000914061	0.00317042	0.00289594	0.00277484	0.00272402	0.00386554	0.00165211	0.00371233	0.00344061	0.00365159	0.00304124	0.00248943
0.308	-0.0064793	0.000891458	0.00383992	-0.00328963	-0.00185307	-0.000894841	-0.00300518	-0.00276423	-0.00386174	0.00564716	-0.000823763	0.00344064	0.00264432	0.00298861	0.00294364	0.00374763	0.00168128	0.00384527	0.00338245	0.00360985	0.00304997	0.00244459
0.309	-0.00690466	0.00097	0.00341314	-0.00384827	-0.00173367	-0.00123363	-0.00341913	-0.00306985	-0.00395395	0.00550438	-0.00071217	0.00369687	0.00242582	0.00317839	0.00314188	0.00360921	0.00171447	0.00400066	0.00329029	0.00355144	0.00306919	0.00240371
0.31	-0.00724607	0.00107767	0.00299312	-0.00432758	-0.00161076	-0.0015401	-0.00372366	-0.00334296	-0.00407013	0.0053734	-0.000587349	0.00391751	0.00226425	0.00333558	0.00330605	0.00345031	0.00173505	0.00417467	0.00317052	0.0034797	0.00309325	0.00237865
0.311	-0.00751253	0.00121738	0.00258605	-0.00470999	-0.00148199	-0.00181215	-0.00389704	-0.00358003	-0.0042136	0.00526792	-0.000457083	0.00408326	0.00217844	0.00345448	0.00342716	0.00327222	0.00173168	0.00435967	0.00303502	0.00339769	0.00311161	0.00237781
0.312	-0.00771678	0.00139126	0.00219764	-0.00498282	-0.00134449	-0.00205203	-0.00392624	-0.00377841	-0.00438531	0.005198	-0.000328288	0.00417947	0.00217524	0.00353148	0.00350073	0.00307779	0.00170183	0.0045457	0.00290203	0.00331066	0.00311211	0.00240384
0.313	-0.00787338	0.00160063	0.00183297	-0.00513883	-0.00119464	-0.00226584	-0.00380834	-0.00393704	-0.00458316	0.00516907	-0.000206359	0.00419796	0.00224629	0.00356508	0.00352728	0.00287175	0.00165488	0.0047224	0.00279601	0.00322886	0.00308496	0.00245328
0.314	-0.00800119	0.0018475	0.00149718	-0.005178	-0.00102911	-0.00246501	-0.00354895	-0.00405709	-0.00480316	0.0051817	-9.8365e-05	0.00414045	0.00237143	0.00355608	0.00351278	0.00266149	0.00161326	0.00488122	0.00274409	0.00316918	0.00302458	0.00251814
0.315	-0.00811295	0.00212895	0.00119245	-0.00510422	-0.000843754	-0.00266214	-0.00316728	-0.00413545	-0.00503546	0.00523062	-3.46544e-06	0.00401436	0.00252886	0.00350728	0.00346615	0.00245534	0.00161191	0.00501547	0.00276868	0.00315529	0.00293705	0.0025889
0.316	-0.00822152	0.00244172	0.000920233	-0.0049282	-0.000635611	-0.00287182	-0.00269072	-0.00417217	-0.00526914	0.00530593	7.81978e-05	0.00383773	0.0026988	0.00342426	0.00339977	0.00226412	0.00168684	0.00512194	0.00287788	0.00321155	0.00283516	0.00265605
0.317	-0.00833694	0.00278071	0.000681001	-0.00466548	-0.000402217	-0.00310927	-0.00215423	-0.00416849	-0.00549104	0.00539417	0.000147962	0.00363709	0.00286577	0.00331451	0.00332671	0.00209994	0.00185675	0.00520058	0.00306136	0.00335386	0.0027382	0.00271218
0.318	-0.00846508	0.003139	0.000474099	-0.00433523	-0.000141994	-0.00338865	-0.00159813	-0.00412672	-0.00568663	0.0054793	0.000208549	0.00344468	0.00301833	0.00318662	0.0032582	0.00197439	0.00211316	0.00525397	0.0032944	0.00358194	0.00266764	0.00275284
0.319	-0.00860707	0.00350786	0.000297887	-0.00395881	0.000145519	-0.00372164	-0.00106539	-0.00405038	-0.00584099	0.00554408	0.000263696	0.0032929	0.00314823	0.00304913	0.0032014	0.00189565	0.00242882	0.00528635	0.0035462	0.00387848	0.00264015	0.00277678
0.32	-0.00875909	0.00387694	0.00014994	-0.00355816	0.000459492	-0.00411609	-0.000598705	-0.00394427	-0.00593985	0.00557174	0.000317706	0.00320566	0.0032497	0.00290942	0.00315824	0.0018655	0.00277155	0.00530265	0.0037868	0.00421485	0.00266093	0.00278601
0.321	-0.00891249	0.00423456	2.72902e-05	-0.0031542	0.000797701	-0.0045749	-0.000237456	-0.0038145	-0.00597068	0.00554747	0.000374961	0.00318973	0.00331902	0.00277294	0.00312606	0.00187802	0.00311223	0.00530746	0.00399108	0.00455871	0.00272139	0.00278565
0.322	-0.00905439	0.00456808	-7.32631e-05	-0.00276526	0.00115655	-0.00509527	-1.50363e-05	-0.00366845	-0.00592373	0.00545987	0.000439436	0.0032321	0.00335452	0.00264314	0.00309971	0.00192123	0.00342737	0.00530441	0.0041404	0.00487976	0.00280323	0.00278358
0.323	-0.00916832	0.0048644	-0.00015437	-0.00240562	0.00153179	-0.00566783	4.31617e-05	-0.00351496	-0.00579312	0.00530178	0.000514327	0.00330584	0.00335667	0.00252232	0.00307445	0.00198018	0.00369956	0.00529579	0.00422345	0.00515298	0.00288592	0.00278989
0.324	-0.0092361	0.00511164	-0.000217839	-0.0020855	0.00191743	-0.00627756	-7.6053e-05	-0.0033628	-0.00557572	0.00507208	0.000600133	0.00337973	0.00332796	0.00241228	0.0030481	0.00204142	0.00391729	0.00528305	0.00423603	0.00536071	0.00295239	0.00281592
0.325	-0.00923909	0.00529792	-0.000266516	-0.00180877	0.0023068	-0.00690494	-0.000376271	-0.00322117	-0.00527349	0.00477515	0.00069758	0.00342722	0.00327317	0.00231627	0.00302276	0.00209361	0.00407458	0.00526671	0.00418046	0.00549218	0.00299398	0.00287202
0.326	-0.00915801	0.00541226	-0.000303548	-0.00157354	0.00269102	-0.00752648	-0.000851083	-0.0030985	-0.00489468	0.00441858	0.000807017	0.00343076	0.00319982	0.00223949	0.00300413	0.00212873	0.00417088	0.00524672	0.00406552	0.00554455	0.00301076	0.0029646
0.327	-0.00897651	0.00544635	-0.000329903	-0.00137312	0.00306204	-0.00811543	-0.00148203	-0.00300306	-0.0044506	0.00401553	0.000925874	0.00338146	0.00311667	0.00218773	0.00299953	0.0021421	0.00421004	0.00522326	0.00390529	0.00552188	0.00300973	0.00309548
0.328	-0.00868179	0.00539483	-0.000345529	-0.00119637	0.00341198	-0.00864418	-0.00224111	-0.00294172	-0.00395611	0.00358248	0.00105017	0.00327853	0.00303287	0.00216574	0.00301514	0.00213226	0.00419943	0.00519683	0.0037175	0.00543414	0.00300244	0.00326082
0.329	-0.00826578	0.00525589	-0.000349327	-0.00102884	0.00373362	-0.0090862	-0.00309276	-0.00291928	-0.0034287	0.00313775	0.00117478	0.00312763	0.00295637	0.0021748	0.003053	0.00210113	0.00414897	0.00516815	0.00352152	0.00529578	0.00300102	0.00345182
0.33	-0.00772604	0.00503169	-0.000339193	-0.000854282	0.0040208	-0.00941806	-0.00399634	-0.00293802	-0.00288736	0.00269991	0.00129383	0.00293883	0.00289254	0.00221132	0.00310946	0.00205427	0.00407012	0.00513799	0.0033358	0.00512416	0.00301407	0.0036565
0.331	-0.00706626	0.00472866	-0.000312165	-0.000656209	0.00426873	-0.00962133	-0.00490884	-0.00299724	-0.00235138	0.00228612	0.00140114	0.00272464	0.00284303	0.00226722	0.00317549	0.00200126	0.00397499	0.00510681	0.00317524	0.00493771	0.00304394	0.00386164
0.332	-0.00629646	0.0043574	-0.000264635	-0.000419631	0.00447428	-0.00968416	-0.00578783	-0.00309317	-0.00183917	0.00191063	0.00149069	0.00249831	0.00280571	0.00233207	0.0032388	0.00195543	0.00387558	0.00507457	0.00304899	0.00475415	0.00308657	0.00405449
0.333	-0.00543239	0.00393238	-0.000192079	-0.000133071	0.00463604	-0.0096024	-0.00659449	-0.00321928	-0.00136761	0.00158355	0.00155744	0.00227257	0.00277545	0.00239537	0.00328657	0.00193237	0.00378309	0.00504061	0.00295969	0.00458858	0.00313394	0.00422402
0.334	-0.00449576	0.00347189	-9.07893e-05	0.000211826	0.00475473	-0.00938005	-0.00729509	-0.00336531	-0.000949742	0.00131014	0.0015962	0.00205951	0.00274576	0.0024492	0.00330824	0.00194636	0.00370722	0.00500395	0.00290398	0.00445273	0.00317793	0.00436181
0.335	-0.00351166	0.00299613	4.17908e-05	0.000617126	0.0048342	-0.00902901	-0.00786354	-0.00352042	-0.00059467	0.00109291	0.001602	0.00187076	0.00270994	0.00248868	0.00329761	0.00200569	0.00365507	0.00496301	0.00287523	0.00435315	0.00321266	0.00446297
0.336	-0.00250989	0.00252633	0.000208411	0.00107946	0.00487607	-0.00857114	-0.0082836	-0.0036703	-0.000308531	0.000922517	0.00157559	0.00171964	0.0026638	0.00251306	0.00325126	0.00210842	0.003631	0.004918	0.00286576	0.00429064	0.00323838	0.00452416
0.337	-0.00152104	0.00208425	0.000409763	0.00158906	0.00488526	-0.00803373	-0.00854842	-0.00380063	-9.27286e-05	0.000787447	0.00151752	0.00162038	0.00260558	0.00252416	0.00317128	0.00224306	0.00363498	0.00486913	0.00286908	0.00426104	0.00325998	0.00454551
0.338	-0.000575512	0.00169033	0.000644602	0.00213054	0.00486753	-0.00744896	-0.00866077	-0.00389744	5.51483e-05	0.000672113	0.0014301	0.0015863	0.00253637	0.0025257	0.00306408	0.00239204	0.00366239	0.0048177	0.00288043	0.00425576	0.00328541	0.00452958
0.339	0.000298151	0.00136234	0.000909422	0.00268394	0.00482912	-0.00685177	-0.00863237	-0.00394821	0.000140688	0.000558218	0.00131718	0.00162442	0.00246003	0.00252213	0.00293953	0.00253615	0.00370443	0.00476617	0.00289671	0.00426295	0.00332255	0.00448082
0.34	0.00107496	0.00111406	0.00119823	0.00322605	0.00477626	-0.00627745	-0.00848243	-0.00394291	0.000171783	0.000426393	0.0011839	0.00173082	0.00238278	0.00251767	0.00280972	0.00265784	0.00374934	0.00471803	0.00291631	0.00426906	0.00337562	0.00440488
0.341	0.0017349	0.000954179	0.0015025	0.00373212	0.00471477	-0.00575922	-0.00823589	-0.00387483	0.0001576	0.000257955	0.00103623	0.00189163	0.00231252	0.00251575	0.00268734	0.00274331	0.00378409	0.0046773	0.00293919	0.00426039	0.00344282	0.00430806
0.342	0.00226411	0.000885517	0.00181127	0.00417777	0.00464968	-0.00532584	-0.00792117	-0.00374132	0.000107502	3.66387e-05	0.000880547	0.00208842	0.00225795	0.00251904	0.00258372	0.00278364	0.00379631	0.00464781	0.0029673	0.00422458	0.00351608	0.00419671
0.343	0.00265505	0.000904353	0.00211177	0.00454079	0.00458503	-0.00500029	-0.007568	-0.00354364	3.02362e-05	-0.00024955	0.000723119	0.00230312	0.00222725	0.0025297	0.00250696	0.00277548	0.00377613	0.00463227	0.00300487	0.00415218	0.00358297	0.00407696
0.344	0.00290859	0.00100134	0.00238928	0.00480311	0.00452332	-0.00479599	-0.00720469	-0.00328842	-6.7796e-05	-0.000607813	0.000569411	0.00252095	0.00222674	0.00254999	0.0024604	0.00272143	0.00371685	0.00463159	0.00305855	0.00403737	0.00362959	0.0039547
0.345	0.00303406	0.00116081	0.00262716	0.00495332	0.00446595	-0.00471694	-0.00685616	-0.00298639	-0.000182266	-0.00103767	0.000423548	0.00273111	0.00225961	0.00258136	0.00244266	0.00262971	0.0036152	0.00464344	0.00313638	0.00387924	0.00364291	0.003835
0.346	0.00304386	0.00136294	0.0028105	0.00498492	0.00441259	-0.00475925	-0.00654313	-0.00265199	-0.000311045	-0.00153508	0.000287946	0.00292667	0.00232418	0.00262511	0.00244721	0.00251407	0.00347473	0.00466386	0.00324471	0.00368267	0.00361432	0.00372446
0.347	0.00295644	0.00158446	0.00292557	0.00489907	0.00436187	-0.00490994	-0.00628019	-0.00230069	-0.00045503	-0.0020892	0.000163887	0.0031038	0.00241491	0.0026802	0.00246587	0.00239233	0.00330311	0.00468653	0.00338645	0.00345866	0.00354013	0.00363015
0.348	0.00279489	0.00180031	0.00295989	0.00470444	0.00431196	-0.00514791	-0.00607439	-0.00194916	-0.000617042	-0.0026831	5.07399e-05	0.00326151	0.00252355	0.00274171	0.00249051	0.00228426	0.00311167	0.00470381	0.00355901	0.00322356	0.00342121	0.00355985
0.349	0.00258458	0.0019857	0.00290406	0.00441658	0.00426045	-0.00544588	-0.00592565	-0.00161378	-0.000801482	-0.00329535	-5.39469e-05	0.00340096	0.00264023	0.00280076	0.00251461	0.00220764	0.00291437	0.00470809	0.00375391	0.00299825	0.00326265	0.00352176
0.35	0.00235135	0.00211812	0.00275269	0.00405687	0.00420461	-0.00577249	-0.00582723	-0.00130935	-0.00101348	-0.00390145	-0.000154286	0.00352476	0.00275495	0.00284518	0.00253443	0.00217388	0.00272598	0.00469318	0.00395811	0.00280583	0.00307275	0.00352342
0.351	0.00211959	0.00217925	0.0025052	0.00365105	0.00414169	-0.00609468	-0.00576668	-0.0010479	-0.0012579	-0.00447548	-0.000255749	0.00363631	0.00285869	0.00286116	0.0025497	0.00218518	0.00255967	0.00465555	0.00415637	0.00266735	0.00286186	0.00357019
0.352	0.00191052	0.00215664	0.00216627	0.00322749	0.00406923	-0.00638032	-0.00572723	-0.000837712	-0.00153828	-0.00499188	-0.000364735	0.00373937	0.00294442	0.00283536	0.00256387	0.00223533	0.00242464	0.00459533	0.00433381	0.00259595	0.00264144	0.00366382
0.353	0.00174018	0.00204484	0.00174587	0.00281515	0.00398489	-0.00660167	-0.00568913	-0.000682179	-0.00185528	-0.00542694	-0.000488236	0.00383752	0.00300779	0.00275715	0.00258381	0.00231385	0.00232468	0.00451692	0.00447807	0.00259253	0.00242364	0.00380163
0.354	0.00162005	0.00184645	0.00125959	0.00244157	0.00388778	-0.00673422	-0.00563245	-0.000581042	-0.00220796	-0.00576068	-0.00063259	0.00393437	0.00304759	0.00262039	0.00261864	0.00241089	0.00225829	0.00442848	0.00458054	0.00264486	0.00222147	0.00397673
0.355	0.00155458	0.0015732	0.000726982	0.00213153	0.00377665	-0.00676199	-0.0055378	-0.000529693	-0.00259186	-0.00597873	-0.0008033	0.00403276	0.00306637	0.00242546	0.00267684	0.00251975	0.0022207	0.00434119	0.00463751	0.00273337	0.00204922	0.00417881
0.356	0.00154243	0.00124455	0.00017061	0.00190467	0.00365137	-0.00667735	-0.00538779	-0.000519785	-0.00299882	-0.00607242	-0.001005	0.00413441	0.00306942	0.00218172	0.00276491	0.00263691	0.00220772	0.00426736	0.00464926	0.00283745	0.00192283	0.00439657
0.357	0.0015742	0.000883763	-0.000382758	0.00177305	0.00351498	-0.00648045	-0.00517101	-0.000537762	-0.00341554	-0.00603706	-0.00124095	0.00423973	0.0030641	0.00191085	0.00288559	0.00276078	0.00221755	0.00421716	0.00461968	0.00294049	0.00185849	0.00461835
0.358	0.00163595	0.00052011	-0.000906977	0.00174254	0.0033705	-0.0061806	-0.00488006	-0.000568335	-0.00382703	-0.00587514	-0.00151156	0.00434734	0.00305952	0.00165063	0.00303507	0.00288977	0.00224999	0.00419571	0.00455556	0.00302975	0.00186646	0.00483277
0.359	0.0017097	0.000185451	-0.00137718	0.00181182	0.0032219	-0.0057947	-0.00451325	-0.000595481	-0.00421658	-0.00559469	-0.00181475	0.00445389	0.00306452	0.00146032	0.00320464	0.00302032	0.00230573	0.00420126	0.00446485	0.0030967	0.00194592	0.00502986
0.36	0.00177514	-8.81441e-05	-0.00177158	0.0019728	0.00307384	-0.00534576	-0.00407476	-0.000604053	-0.00456704	-0.00520856	-0.00214598	0.00455418	0.00308601	0.00140849	0.00338262	0.00314634	0.0023841	0.00422525	0.00435552	0.00313633	0.00208409	0.00520147
0.361	0.00181147	-0.00027092	-0.00207325	0.00221147	0.00293148	-0.00486092	-0.00357435	-0.000581345	-0.00486224	-0.00473325	-0.00249836	0.00464162	0.00312762	0.00152376	0.0035568	0.00325989	0.0024813	0.00425439	0.00423478	0.0031465	0.0022609	0.00534147
0.362	0.00179937	-0.000337873	-0.00227149	0.00250925	0.00280014	-0.00436919	-0.00302667	-0.000518495	-0.00508845	-0.00418773	-0.00286303	0.00470906	0.0031893	0.00176555	0.00371622	0.0033527	0.00258996	0.0042739	0.00410925	0.00312754	0.00245508	0.00544571
0.363	0.00172257	-0.000271153	-0.002363	0.00284535	0.00268527	-0.0038996	-0.00245011	-0.000411077	-0.00523543	-0.00359245	-0.00322972	0.00474957	0.00326785	0.00206783	0.00385221	0.00341831	0.00270004	0.00427079	0.00398577	0.00308229	0.0026481	0.00551199
0.364	0.00157038	-6.1206e-05	-0.00235241	0.00319658	0.00259155	-0.0034773	-0.00186593	-0.000261365	-0.00529844	-0.00296678	-0.00358721	0.00475761	0.00335831	0.00237913	0.0039595	0.00345355	0.00280074	0.00423618	0.00387223	0.00301605	0.00282594	0.00553974
0.365	0.00133782	0.000291679	-0.00225243	0.00354109	0.00252298	-0.00312292	-0.00129625	-7.68875e-05	-0.00527816	-0.00232961	-0.00392413	0.00472943	0.00345538	0.00266765	0.00403531	0.00345994	0.00288222	0.00416688	0.00377846	0.00293649	0.00297956	0.00552976
0.366	0.00102675	0.000779021	-0.00208305	0.00386142	0.00248079	-0.00285115	-0.000761033	0.000128037	-0.00518208	-0.00170193	-0.00422732	0.00466254	0.00355531	0.00291582	0.00407839	0.00344404	0.00293754	0.00406465	0.00371556	0.00285275	0.00310434	0.00548422
0.367	0.000646138	0.00137943	-0.00187026	0.00414056	0.00246858	-0.00266818	-0.000281319	0.000337546	-0.00502169	-0.00109326	-0.00448952	0.00455851	0.00365393	0.00311603	0.0040896	0.00341599	0.00296246	0.00393814	0.00369317	0.00277465	0.00320046	0.00540608
0.368	0.000211417	0.00206305	-0.00164509	0.00436771	0.00248764	-0.00257215	0.000125515	0.000531518	-0.00481378	-0.000513545	-0.00470358	0.00442047	0.00374904	0.00326789	0.00406958	0.00338782	0.0029563	0.0037987	0.00371633	0.00271032	0.00327114	0.00529827
0.369	-0.000255981	0.00279294	-0.00144064	0.00453785	0.00253808	-0.00255336	0.000446647	0.000688785	-0.0045789	3.04679e-05	-0.00486452	0.00425296	0.00383939	0.00337589	0.0040184	0.0033704	0.00292176	0.0036583	0.00378225	0.00266408	0.00332129	0.00516429
0.37	-0.000730328	0.0035273	-0.00128994	0.00465157	0.00261882	-0.00259498	0.000674039	0.000788843	-0.00433957	0.000535183	-0.00496999	0.00406159	0.00392395	0.00344755	0.00393506	0.00337035	0.00286394	0.00352692	0.00387972	0.00263537	0.00335607	0.00500802
0.371	-0.00118342	0.0042223	-0.0012233	0.00471465	0.00272765	-0.00267441	0.000804802	0.0008138	-0.00411845	0.000999686	-0.00502025	0.00385266	0.00400149	0.00349177	0.00381769	0.00338822	0.00278921	0.00341018	0.00399128	0.00261928	0.00337962	0.00483386
0.372	-0.00158667	0.00483509	-0.00126592	0.00473715	0.00286124	-0.00276511	0.000841211	0.000750179	-0.00393634	0.00142513	-0.00501806	0.00363295	0.00407018	0.00351744	0.00366407	0.00341878	0.00270387	0.00330856	0.0040973	0.00260898	0.00339416	0.00464686
0.373	-0.0019126	0.00532637	-0.00143533	0.00473259	0.00301554	-0.00283878	0.000790139	0.000590134	-0.00381063	0.00181324	-0.00496876	0.0034101	0.00412753	0.00353265	0.00347276	0.00345353	0.00261294	0.00321841	0.00418003	0.00259901	0.00340022	0.00445285
0.374	-0.00213866	0.00566447	-0.00174058	0.00471529	0.00318518	-0.00286737	0.000663012	0.000333217	-0.00375289	0.00216784	-0.0048783	0.00319206	0.00417079	0.00354436	0.00324381	0.00348408	0.00251947	0.00313498	0.00422716	0.00258838	0.00339646	0.00425811
0.375	-0.0022475	0.00582675	-0.0021803	0.00469991	0.00336426	-0.00282545	0.000474637	-1.35449e-05	-0.00376844	0.00249226	-0.00475376	0.00298812	0.0041971	0.00355873	0.0029799	0.0035054	0.00242454	0.00305561	0.00423363	0.00258247	0.00338143	0.00406921
0.376	-0.00222945	0.00580192	-0.00274182	0.00470032	0.00354577	-0.00269292	0.000242321	-0.000437185	-0.00385518	0.00278715	-0.00460177	0.00280815	0.00420377	0.00358189	0.00268696	0.00351776	0.00232821	0.00298212	0.00420202	0.0025927	0.00335428	0.00389275
0.377	-0.00208196	0.00559063	-0.00340319	0.00472647	0.00372266	-0.00245555	-1.44368e-05	-0.000915436	-0.00400481	0.00305552	-0.00442887	0.00266197	0.00418862	0.00361928	0.00237458	0.0035267	0.00223022	0.00292228	0.00414161	0.00263422	0.00331588	0.00373406
0.378	-0.00180977	0.00520435	-0.0041341	0.00478401	0.00388917	-0.00210491	-0.00027794	-0.00142132	-0.00420187	0.00329924	-0.00424142	0.00255761	0.00415018	0.003675	0.00205682	0.00354085	0.00213145	0.00288779	0.00406659	0.00272015	0.00326971	0.00359568
0.379	-0.00142588	0.00466602	-0.00489679	0.00487484	0.00403927	-0.00164101	-0.000531442	-0.00192503	-0.00442559	0.00351836	-0.00404353	0.00249718	0.00408774	0.00375193	0.00175244	0.00356954	0.00203546	0.0028895	0.00399151	0.00285513	0.00322077	0.00347828
0.38	-0.000950052	0.00400808	-0.00564909	0.00499618	0.00416755	-0.00107168	-0.000760533	-0.00239557	-0.00465162	0.00371211	-0.0038374	0.00247519	0.00400132	0.00384995	0.00148575	0.00361814	0.00194867	0.0029324	0.00392712	0.00303287	0.00317531	0.00338018
0.381	-0.000407279	0.00327014	-0.00634734	0.00514087	0.00426946	-0.000412038	-0.000953951	-0.00280313	-0.00485427	0.00387918	-0.00362323	0.00247905	0.0038917	0.00396497	0.00128639	0.0036848	0.00187968	0.00301192	0.00387689	0.00323783	0.00314008	0.0032981
0.382	0.000174006	0.00249624	-0.00694953	0.00529808	0.00434148	0.000316435	-0.00110416	-0.00312141	-0.00500877	0.00401813	-0.00339931	0.00249227	0.00376059	0.00408895	0.00118293	0.00375965	0.00183755	0.00311422	0.00383607	0.00344975	0.00312182	0.00322821
0.383	0.000764363	0.00173143	-0.00741802	0.00545448	0.00438163	0.00108827	-0.00120796	-0.00333014	-0.00509453	0.00412731	-0.00316295	0.00249868	0.00361082	0.00421081	0.00118642	0.00382663	0.0018291	0.00322011	0.00379388	0.00364848	0.00312727	0.00316711
0.384	0.00133451	0.00101935	-0.00772336	0.00559513	0.00438863	0.00187298	-0.00126587	-0.00341568	-0.005095	0.00420648	-0.00290944	0.00248645	0.00344694	0.00431786	0.00127928	0.00386714	0.00185635	0.00331007	0.00373869	0.00381745	0.00316267	0.00311301
0.385	0.00185829	0.000398721	-0.00784568	0.00570531	0.00436285	0.00263944	-0.00128227	-0.00337291	-0.00500122	0.00425611	-0.00263386	0.00245088	0.0032754	0.00439766	0.00142955	0.00386395	0.00191584	0.00336873	0.00366298	0.00394564	0.003234	0.00306565
0.386	0.00231451	-9.95123e-05	-0.00777618	0.00577182	0.00430612	0.00335726	-0.0012656	-0.00320559	-0.00481233	0.00427741	-0.0023315	0.00239603	0.00310439	0.00443967	0.00160984	0.00380415	0.00199991	0.00338795	0.00356764	0.00402864	0.00334637	0.00302595
0.387	0.00268692	-0.000454178	-0.00751708	0.00578366	0.00422063	0.003998	-0.00122688	-0.0029251	-0.00453575	0.00427306	-0.00199885	0.00233464	0.00294374	0.0044359	0.00180192	0.00368133	0.00209924	0.0033681	0.00346392	0.00406842	0.00350236	0.00299529
0.388	0.0029671	-0.000654202	-0.00708507	0.00573488	0.00411088	0.00453814	-0.00117658	-0.00255123	-0.00418961	0.00424731	-0.00163387	0.00228997	0.00280488	0.00438221	0.00199461	0.00349914	0.00220425	0.00331988	0.00337343	0.00406951	0.003701	0.00297369
0.389	0.00315378	-0.00070042	-0.00650752	0.0056236	0.00398204	0.00495952	-0.00112808	-0.00210954	-0.00379777	0.00420434	-0.00123686	0.00228849	0.00269759	0.00427855	0.00217935	0.00326986	0.00230754	0.00326109	0.00332162	0.00404026	0.00393611	0.0029599
0.39	0.0032526	-0.000604927	-0.00582125	0.00545269	0.00383988	0.00525042	-0.00109484	-0.00162918	-0.00338953	0.00414863	-0.00081062	0.00235229	0.00262843	0.00412867	0.00234833	0.00301568	0.00240385	0.0032143	0.00332862	0.00398961	0.0041965	0.00295087
0.391	0.00327525	-0.000390021	-0.0050699	0.00522949	0.00369034	0.00540616	-0.00108949	-0.00114037	-0.00299729	0.00408449	-0.000360582	0.00248993	0.00259916	0.00393968	0.00249394	0.00276844	0.00248984	0.00320141	0.0033992	0.00392515	0.00446714	0.0029423
0.392	0.00323811	-8.64415e-05	-0.00430087	0.00496513	0.00353909	0.0054291	-0.0011229	-0.000671729	-0.00265382	0.00401573	0.000105371	0.00269331	0.00260666	0.00372148	0.00260926	0.00256745	0.00256368	0.00323709	0.0035186	0.00385199	0.00473086	0.00292967
0.393	0.00316087	0.000268979	-0.00356181	0.00467343	0.00339107	0.00532893	-0.00120311	-0.000247766	-0.00238985	0.00394447	0.000576795	0.00294261	0.00264455	0.00348616	0.00268891	0.00245198	0.00262446	0.00332385	0.00365704	0.00377301	0.00497055	0.0029095
0.394	0.00306384	0.000635852	-0.00289745	0.00436978	0.00325004	0.00512012	-0.00133559	0.00011347	-0.00223032	0.00387288	0.00104264	0.00321463	0.00270572	0.00324743	0.00273014	0.00244747	0.00267212	0.00345226	0.0037794	0.00369008	0.00517072	0.00288038
0.395	0.00296672	0.000973475	-0.0023464	0.00406956	0.00311816	0.00482231	-0.00152213	0.000401996	-0.00219268	0.00380155	0.00149077	0.00348848	0.00278447	0.00302015	0.00273358	0.0025533	0.00270696	0.00360512	0.00385396	0.0036064	0.00531942	0.00284373
0.396	0.0028867	0.00124355	-0.00193852	0.00378674	0.00299577	0.0044587	-0.00176074	0.000616822	-0.00228499	0.00372964	0.00190907	0.00374828	0.00287739	0.00281964	0.00270346	0.00274553	0.00272959	0.00376372	0.00385811	0.00352843	0.00540941	0.00280408
0.397	0.00283546	0.00141207	-0.00169173	0.00353076	0.00288116	0.00405282	-0.00204635	0.00076573	-0.00250314	0.00365527	0.00228584	0.00398271	0.00298246	0.0026611	0.00264753	0.00299229	0.00274105	0.00391212	0.00378067	0.00346766	0.00543873	0.00276821
0.398	0.00282157	0.00145349	-0.00161393	0.00330974	0.00277013	0.00363088	-0.00236952	0.000865824	-0.00283541	0.00357613	0.00261172	0.0041868	0.00309912	0.00255541	0.00257563	0.00326504	0.00274279	0.00404114	0.00362543	0.00343608	0.00541121	0.00274485
0.399	0.00284843	0.00135081	-0.00170012	0.00312732	0.00265669	0.00321771	-0.00271862	0.000940552	-0.00325935	0.00348846	0.00287998	0.00435905	0.00322514	0.00250822	0.00249853	0.00354384	0.00273672	0.00414732	0.00340945	0.00344494	0.00533567	0.00274304
0.4	0.00291302	0.00109648	-0.00193495	0.00298168	0.00253346	0.0028349	-0.00307992	0.00101799	-0.00374367	0.00338855	0.00308649	0.0044999	0.00335605	0.00251766	0.00242619	0.00381651	0.00272544	0.00423205	0.00316308	0.0034992	0.00522513	0.00277044
0.401	0.00300714	0.000692934	-0.00229356	0.00286638	0.00239191	0.00250009	-0.00343843	0.00112816	-0.00425103	0.00327309	0.00323025	0.00461053	0.00348507	0.00257416	0.00236592	0.00407597	0.00271204	0.00429964	0.00292763	0.00359386	0.00509532	0.00283203
0.402	0.00311834	0.00015206	-0.00274386	0.00277098	0.00222284	0.00222597	-0.00377891	0.0013001	-0.00474092	0.00313971	0.00331343	0.00469188	0.00360399	0.00266291	0.00232163	0.00431789	0.00269998	0.00435495	0.00274831	0.00371424	0.00496286	0.0029296
0.403	0.00323118	-0.000505681	-0.00324959	0.00268218	0.00201714	0.00202011	-0.0040861	0.00155958	-0.00517303	0.00298714	0.00334161	0.00474418	0.00370468	0.00276721	0.00229429	0.00453902	0.00269263	0.0044013	0.00266035	0.00383965	0.00484333	0.00306203
0.404	0.00332876	-0.00125366	-0.00377214	0.00258486	0.00176641	0.0018834	-0.00434744	0.00192438	-0.00551017	0.00281634	0.00332192	0.00476718	0.00378094	0.00287162	0.00228354	0.00473643	0.00269295	0.00443954	0.0026724	0.00394884	0.00474967	0.00322625
0.405	0.00339441	-0.00206026	-0.00427474	0.00246381	0.00146374	0.00181113	-0.00455262	0.00240354	-0.00572165	0.00263	0.00326342	0.00476075	0.00383004	0.00296326	0.00228951	0.00490756	0.00270282	0.00446775	0.00276221	0.0040248	0.00469112	0.00341788
0.406	0.00341332	-0.00289132	-0.00472501	0.00230525	0.00110439	0.00179332	-0.00469431	0.00299575	-0.00578593	0.00243258	0.0031763	0.0047259	0.00385373	0.00303246	0.00231381	0.00505073	0.00272241	0.00448233	0.00289032	0.00405815	0.00467305	0.00363152
0.407	0.00337306	-0.0037133	-0.00509718	0.00209756	0.00068628	0.00181553	-0.0047687	0.0036894	-0.00569099	0.00222979	0.00307126	0.00466572	0.00385823	0.00307263	0.00235879	0.0051663	0.00274959	0.00447889	0.00301899	0.00404914	0.00469717	0.00386019
0.408	0.00326482	-0.00449476	-0.00537468	0.00183267	0.000210152	0.00185958	-0.00477566	0.00446195	-0.00543732	0.00202913	0.00295767	0.00458544	0.00385356	0.00308005	0.00242575	0.00525611	0.00278008	0.00445505	0.00312273	0.0040074	0.00476278	0.00409585
0.409	0.00308764	-0.00520593	-0.00554813	0.00151043	-0.000318986	0.00190591	-0.0047196	0.00527866	-0.00504094	0.00183895	0.00284443	0.00449325	0.00385165	0.00305255	0.00251249	0.00532366	0.00280808	0.00441209	0.00319052	0.00395047	0.0048668	0.00432993
0.41	0.00284461	-0.00582396	-0.00561895	0.00113473	-0.000892653	0.00193398	-0.00460833	0.00609845	-0.00452685	0.00166656	0.00273866	0.0043986	0.00386278	0.0029892	0.00261201	0.00537414	0.00282663	0.0043534	0.00322511	0.00389999	0.00500347	0.00455199
0.411	0.00254383	-0.00633262	-0.00559749	0.000714937	-0.00149901	0.00192424	-0.0044528	0.00687546	-0.00392934	0.00151812	0.00264559	0.00431083	0.00389279	0.00288948	0.00271269	0.00541295	0.00282866	0.00428493	0.00323847	0.00387607	0.00516426	0.00475086
0.412	0.00219769	-0.00672279	-0.00550154	0.000265373	-0.00212333	0.00185959	-0.00426644	0.00756233	-0.0032893	0.0013979	0.00256852	0.00423743	0.00394113	0.00275295	0.00279992	0.00544428	0.00280817	0.00421401	0.0032461	0.00389102	0.00533775	0.00491545
0.413	0.00182178	-0.00699323	-0.00535531	-0.00019543	-0.00274862	0.00172734	-0.00406296	0.00811484	-0.00264995	0.00130787	0.00251022	0.00418263	0.0040009	0.00257915	0.00285851	0.0054698	0.00276128	0.00414825	0.00326081	0.00394518	0.00551016	0.00503522
0.414	0.00143321	-0.00714816	-0.00518458	-0.000646782	-0.00335682	0.00151902	-0.0038586	0.00849286	-0.00205594	0.0012465	0.00246997	0.00414707	0.00406087	0.00236907	0.00287517	0.00548816	0.00268786	0.00409344	0.00328699	0.00402745	0.00566623	0.00510241
0.415	0.00104973	-0.00719754	-0.00501617	-0.0010669	-0.00392962	0.00123183	-0.00366884	0.00866542	-0.00154787	0.00120875	0.00244624	0.00412844	0.00410861	0.00212604	0.00284019	0.00549511	0.00259231	0.00405306	0.00331897	0.00411984	0.00579079	0.00511202
0.416	0.000688028	-0.0071558	-0.0048752	-0.00143467	-0.00444954	0.000869173	-0.00350737	0.00861334	-0.00115891	0.00118611	0.00243729	0.0041234	0.00413368	0.00185832	0.00274875	0.00548454	0.00248417	0.00402837	0.00334306	0.00420375	0.00587035	0.00506242
0.417	0.000362193	-0.00704028	-0.00478269	-0.00173143	-0.00490098	0.000440575	-0.0033852	0.00833077	-0.000912216	0.00116675	0.00244151	0.00412975	0.00412996	0.00158367	0.00260142	0.00545005	0.00237802	0.00401901	0.00334235	0.00426534	0.00589471	0.00495576
0.418	7.88527e-05	-0.00687211	-0.00475608	-0.00194239	-0.00526998	-3.66231e-05	-0.00330493	0.00782824	-0.000813179	0.00113775	0.00246058	0.00414874	0.00409628	0.00133714	0.00240425	0.00538714	0.00229158	0.00402386	0.00330134	0.00429796	0.00585778	0.00479871
0.419	-0.000153662	-0.00666742	-0.00480123	-0.00205913	-0.00554854	-0.000545347	-0.00327487	0.00712549	-0.000865303	0.00108232	0.00249186	0.00418228	0.00403789	0.00117757	0.00216691	0.00529275	0.00224217	0.00404232	0.00321238	0.00430374	0.00575975	0.00459981
0.42	-0.000332952	-0.00644205	-0.00491748	-0.00207813	-0.00573201	-0.00106293	-0.00329561	0.00625668	-0.00105552	0.000982159	0.00253554	0.00423521	0.00396402	0.00117136	0.00190301	0.00516806	0.00224068	0.00407396	0.00307669	0.00429154	0.00560613	0.00437091
0.421	-0.00046134	-0.00620927	-0.00509671	-0.0020023	-0.00582002	-0.00156489	-0.0033629	0.00526644	-0.00135843	0.000819439	0.00259304	0.00431188	0.00388572	0.00133008	0.00162772	0.00501814	0.00228671	0.00411811	0.00290592	0.00427334	0.00540779	0.00412592
0.422	-0.000545216	-0.00597854	-0.0053239	-0.00184074	-0.00581651	-0.00202674	-0.0034683	0.00420671	-0.00173899	0.000577792	0.00266667	0.00441382	0.0038132	0.00159655	0.00135599	0.00485162	0.00236801	0.00417316	0.00272163	0.00426015	0.00518015	0.00387978
0.423	-0.000595829	-0.00575666	-0.00557936	-0.00160805	-0.00572871	-0.00242453	-0.0035984	0.00313505	-0.00215355	0.000245203	0.0027613	0.00453828	0.00375304	0.0019053	0.00110201	0.00467956	0.00246447	0.00423624	0.00255292	0.00425854	0.00494212	0.00364682
0.424	-0.000624816	-0.00554367	-0.0058386	-0.00132355	-0.0055682	-0.00273979	-0.00373853	0.00210602	-0.00255738	-0.000188583	0.00287897	0.00467768	0.00370687	0.00221076	0.000882113	0.00451453	0.00255488	0.00430186	0.00242913	0.00426734	0.00471283	0.00344144
0.425	-0.000644928	-0.0053358	-0.00607584	-0.00100981	-0.00534866	-0.00295896	-0.00387194	0.00117081	-0.00290589	-0.000728497	0.00302142	0.00482111	0.00367158	0.00248507	0.000725645	0.00436854	0.00262077	0.00436304	0.00237004	0.00427877	0.00450958	0.00327609
0.426	-0.000669279	-0.0051263	-0.00626631	-0.000690982	-0.00508485	-0.00307432	-0.00398061	0.000374053	-0.00315787	-0.00137308	0.00318994	0.00495653	0.00364117	0.00271237	0.000686993	0.00425146	0.00264872	0.00441243	0.00237698	0.00428182	0.00434532	0.00316014
0.427	-0.000709846	-0.00490584	-0.0063881	-0.00039107	-0.00479158	-0.00308507	-0.00404676	-0.000249498	-0.00327924	-0.00211448	0.00338432	0.00507307	0.00360965	0.00288581	0.000809535	0.00416969	0.00263142	0.00444332	0.00243243	0.00426632	0.0042266	0.00309915
0.428	-0.000779714	-0.00466597	-0.0064259	-0.000132058	-0.00448135	-0.00299405	-0.00405028	-0.000673486	-0.00323965	-0.00293514	0.00360623	0.00516349	0.00357294	0.00300583	0.00107115	0.0041256	0.00256638	0.0044509	0.00250928	0.00422663	0.00415348	0.0030947
0.429	-0.000888114	-0.004396	-0.00636869	6.68202e-05	-0.00416594	-0.00281479	-0.00397666	-0.000887434	-0.00302639	-0.00381312	0.00385219	0.00522434	0.00353146	0.00307941	0.00142606	0.00411742	0.00245859	0.00443239	0.00258375	0.00416379	0.00412014	0.00314288
0.43	-0.00103511	-0.00408357	-0.00621029	0.000191151	-0.00385471	-0.00256932	-0.00381969	-0.000897181	-0.00264573	-0.00472603	0.0041125	0.00525613	0.00349027	0.00311909	0.00183961	0.00414014	0.00231772	0.00438746	0.00264178	0.00408721	0.00411819	0.00323427
0.431	-0.00121962	-0.00372067	-0.00595263	0.000232257	-0.00355328	-0.00228159	-0.00357471	-0.000717844	-0.00211184	-0.00564525	0.00437823	0.00526343	0.00345598	0.0031399	0.00228566	0.00418643	0.00215661	0.00431844	0.00268185	0.00401079	0.00413858	0.00335654
0.432	-0.0014369	-0.00330252	-0.00560405	0.000187386	-0.00326362	-0.00197821	-0.00324226	-0.000374576	-0.00145063	-0.00653981	0.00463895	0.00525338	0.003435	0.00315679	0.00273995	0.00424746	0.00199086	0.00422943	0.00271408	0.00394938	0.00417337	0.00349514
0.433	-0.00168168	-0.0028303	-0.00517939	5.97073e-05	-0.0029831	-0.00168468	-0.00282643	0.000102318	-0.00069543	-0.00737552	0.00488612	0.00523382	0.00343069	0.00318209	0.00317856	0.00431367	0.00183769	0.00412607	0.00275694	0.00391411	0.00421655	0.00363366
0.434	-0.00194302	-0.00230691	-0.00469627	-0.000142279	-0.00270721	-0.00142764	-0.0023391	0.000674736	0.000110448	-0.00812282	0.00510739	0.00521188	0.00344237	0.00322232	0.00357867	0.00437491	0.00171625	0.00401426	0.00282903	0.00390629	0.0042625	0.00375789
0.435	-0.00220833	-0.00174016	-0.00417462	-0.000405682	-0.00242864	-0.00123001	-0.001797	0.00130351	0.000919828	-0.00875484	0.00529107	0.00519287	0.00346496	0.0032782	0.00392007	0.00442116	0.00164555	0.00390059	0.00294285	0.00391716	0.00430642	0.0038557
0.436	-0.00246539	-0.0011432	-0.00363541	-0.00071436	-0.00213801	-0.00110859	-0.0012202	0.00195219	0.00168624	-0.00924808	0.00542804	0.00517964	0.00349087	0.00334638	0.00418684	0.00444337	0.00164172	0.0037928	0.00309933	0.00393068	0.00434391	0.00391784
0.437	-0.00270268	-0.000533439	-0.00309857	-0.00105032	-0.00182513	-0.00107323	-0.000631514	0.00258907	0.00236679	-0.00958453	0.00551161	0.00517291	0.0035127	0.00342203	0.00436876	0.00443427	0.00171411	0.00369993	0.00328697	0.0039286	0.00437094	0.00393921
0.438	-0.00291122	6.77946e-05	-0.00258231	-0.00139505	-0.00147957	-0.00112467	-5.39198e-05	0.00319072	0.00292709	-0.00975113	0.0055398	0.00517222	0.00352563	0.00350155	0.00446214	0.0043896	0.00186197	0.00363218	0.00348581	0.00389621	0.00438454	0.00391971
0.439	-0.003093	0.000632643	-0.00210452	-0.00173167	-0.0010897	-0.0012506	0.000498715	0.00374908	0.00335279	-0.00973167	0.00552349	0.00517837	0.00352777	0.00358327	0.00447073	0.00430948	0.00207495	0.00359994	0.00367462	0.00382544	0.00438312	0.00386554
0.44	-0.00323486	0.0011405	-0.00167035	-0.00204491	-0.000651708	-0.00144422	0.000993069	0.00424827	0.00361688	-0.00953951	0.00545546	0.00518966	0.00352339	0.00366891	0.00440392	0.00419772	0.00234049	0.00361323	0.00383218	0.00371937	0.00436844	0.00378444
0.441	-0.00333363	0.00156698	-0.00128383	-0.00232305	-0.000163212	-0.00168534	0.00140839	0.00468826	0.00371487	-0.00918575	0.00534053	0.00520606	0.00351761	0.00376092	0.00427719	0.00406373	0.00264144	0.00367722	0.00394305	0.0035914	0.00434516	0.00368964
0.442	-0.00338878	0.0018892	-0.00094428	-0.00255835	0.000374349	-0.00194865	0.00172807	0.00507634	0.00365424	-0.00868789	0.00518574	0.00522754	0.0035149	0.0038606	0.00410983	0.00392182	0.00295956	0.003791	0.00399837	0.00346385	0.00432126	0.00359641
0.443	-0.00340529	0.00208526	-0.000647754	-0.00274742	0.000956564	-0.00220433	0.00194266	0.00542814	0.00345561	-0.00806582	0.00500306	0.00525246	0.00351631	0.00396617	0.00392257	0.00379003	0.0032773	0.00394731	0.0039956	0.00336348	0.00430684	0.00351862
0.444	-0.00338606	0.00213993	-0.000386436	-0.00289105	0.00157404	-0.00242388	0.00204597	0.00575899	0.00314634	-0.00734652	0.00480068	0.00527872	0.00351766	0.00407107	0.00373512	0.00368724	0.00357722	0.00413454	0.00394011	0.00331332	0.00431301	0.00346759
0.445	-0.00333509	0.00204345	-0.000150417	-0.00299385	0.00221408	-0.00258047	0.00203759	0.00608495	0.00276001	-0.00655909	0.00458593	0.00530215	0.00350984	0.00416452	0.00356404	0.00362929	0.00384412	0.00433979	0.00384401	0.00332419	0.00434915	0.00344815
0.446	-0.00325847	0.00179136	7.0407e-05	-0.00306364	0.00286197	-0.0026507	0.00192397	0.00642178	0.00233489	-0.00573132	0.00436624	0.00531633	0.00348077	0.00423332	0.00342171	0.00362469	0.00406653	0.00455145	0.00372483	0.00339001	0.00442022	0.00345727
0.447	-0.0031627	0.00138564	0.000285225	-0.00311046	0.00350165	-0.00261717	0.00171727	0.00678188	0.00191011	-0.0048889	0.00414712	0.00531363	0.00341863	0.00426401	0.00331688	0.00367191	0.00423741	0.00476096	0.00360414	0.00349023	0.00452512	0.00348558
0.448	-0.00305414	0.000834891	0.000501101	-0.00314552	0.00411686	-0.00246992	0.00143455	0.00717265	0.00152269	-0.00405359	0.0039316	0.00528647	0.00331522	0.0042452	0.00325648	0.00376006	0.00435478	0.0049633	0.00350507	0.00359758	0.0046566	0.00352019
0.449	-0.00294903	0.000147973	0.000717641	-0.00318087	0.00469536	-0.00219979	0.00110665	0.00760621	0.00121742	-0.00322724	0.00373382	0.00522957	0.00316881	0.00416948	0.00324708	0.00387253	0.00442039	0.00515614	0.00344884	0.00368642	0.00480247	0.00354858
0.45	-0.00284809	-0.000651598	0.000937409	-0.00322632	0.00522317	-0.00181732	0.000751901	0.00807272	0.00101394	-0.00242635	0.00354536	0.00513872	0.0029876	0.00403454	0.00329514	0.00399115	0.00444273	0.00533906	0.0034496	0.00373651	0.00494844	0.00355975
0.451	-0.00274985	-0.00153609	0.00115934	-0.0032898	0.00568807	-0.00134138	0.000389012	0.00855595	0.00092254	-0.00166215	0.00335458	0.00501276	0.0027899	0.00384468	0.00340472	0.0041002	0.00443308	0.00551081	0.00351142	0.00373789	0.00507972	0.00354555
0.452	-0.00265501	-0.0024758	0.00137727	-0.00337739	0.00608207	-0.000795211	3.93591e-05	0.00903785	0.000947665	-0.000935182	0.00315161	0.00485431	0.0026046	0.00361002	0.00357373	0.00418847	0.00440326	0.00566768	0.0036284	0.00368856	0.00518275	0.00350217
0.453	-0.00256542	-0.00344027	0.00158129	-0.00349249	0.00640136	-0.000205982	-0.000276431	0.0094991	0.00108588	-0.000237561	0.00292845	0.00466877	0.00246683	0.00334664	0.00379177	0.00425004	0.00436448	0.00580253	0.00378637	0.00359319	0.0052458	0.0034289
0.454	-0.00247809	-0.00439687	0.00176084	-0.00363498	0.00664514	0.000394493	-0.000544212	0.00991555	0.00132204	0.000438444	0.00267193	0.00446426	0.00240937	0.0030754	0.00404071	0.00428395	0.0043242	0.00590556	0.00396942	0.00346194	0.00526127	0.00332883
0.455	-0.00238839	-0.00531366	0.00190517	-0.00380172	0.00681576	0.000973851	-0.000755607	0.0102628	0.00163271	0.00110242	0.00236856	0.0042505	0.00244761	0.00282058	0.00429749	0.0042934	0.00428597	0.00596525	0.00416267	0.0033079	0.00522549	0.00320806
0.456	-0.00229229	-0.00616209	0.00200367	-0.00398701	0.00691879	0.0015027	-0.000907157	0.0105202	0.00198994	0.00176665	0.00200841	0.00403784	0.0025703	0.00260732	0.00453806	0.00428449	0.00425025	0.0059703	0.0043539	0.00314404	0.00513817	0.00307501
0.457	-0.00218561	-0.00691785	0.00204745	-0.00418296	0.00696213	0.00195653	-0.00100129	0.0106721	0.002363	0.00244309	0.00158477	0.00383673	0.00274658	0.00245724	0.00474099	0.00426467	0.00421595	0.005912	0.00453479	0.00298116	0.00500265	0.00294066
0.458	-0.00206449	-0.00756209	0.0020303	-0.00438021	0.00695525	0.00231776	-0.00104598	0.0107093	0.00272109	0.00314193	0.00109534	0.00365733	0.0029408	0.00238291	0.00489032	0.00424118	0.00418284	0.00578644	0.00470089	0.00282664	0.00482578	0.00281874
0.459	-0.00193119	-0.00808638	0.00194674	-0.00456784	0.0069096	0.00258114	-0.0010496	0.0106362	0.00304238	0.00387838	0.000551004	0.00350931	0.00312433	0.00238459	0.00497738	0.00421959	0.00415367	0.0055961	0.00485138	0.00268483	0.00461843	0.00272582
0.46	-0.00179153	-0.00848961	0.00179453	-0.00473574	0.00683807	0.00275182	-0.00102062	0.010467	0.00331255	0.00466743	-2.94222e-05	0.00340231	0.00327775	0.00245138	0.00500219	0.00420284	0.00413433	0.00535028	0.00498593	0.00255759	0.00439373	0.00267889
0.461	-0.00163304	-0.0087645	0.00158354	-0.00487488	0.00674702	0.00283035	-0.000988687	0.0102031	0.00350175	0.00548903	-0.000647959	0.00334171	0.00339141	0.00256558	0.00497403	0.00419186	0.00413508	0.00506594	0.00510624	0.00244638	0.00416782	0.00269189
0.462	-0.00145372	-0.00891617	0.00132285	-0.00497746	0.00664375	0.00283254	-0.000974537	0.00986146	0.00359891	0.00633258	-0.00128925	0.0033313	0.00346524	0.00271065	0.00490929	0.00418493	0.0041663	0.00476584	0.00521343	0.00235437	0.0039588	0.00277301
0.463	-0.00125457	-0.00895629	0.00102385	-0.00503748	0.0065342	0.00278159	-0.000996303	0.00946594	0.00360297	0.00718506	-0.00193156	0.00337057	0.0035047	0.00287338	0.00482939	0.00417888	0.00423576	0.00447625	0.00530685	0.00228609	0.00378392	0.00292186
0.464	-0.00103455	-0.00889806	0.00070054	-0.00505119	0.00642184	0.00270343	-0.00107138	0.00903903	0.00351808	0.00802447	-0.0025549	0.00345416	0.00352029	0.00304381	0.00475684	0.00417083	0.00434471	0.00422215	0.00538515	0.00224984	0.00366058	0.00312909
0.465	-0.000792717	-0.00875626	0.000367753	-0.00501685	0.0063079	0.00262515	-0.00121379	0.00860168	0.00335457	0.00882374	-0.00313988	0.00357178	0.0035239	0.00321434	0.0047101	0.00415931	0.00448674	0.0040219	0.00544563	0.00225468	0.00360185	0.00337852
0.466	-0.000530329	-0.00854737	3.92921e-05	-0.00493467	0.00619234	0.00257323	-0.00143123	0.00817362	0.00312969	0.00955539	-0.00366607	0.00370986	0.00352524	0.00337896	0.00469901	0.00414479	0.00464917	0.00388295	0.0054844	0.00230679	0.00361235	0.00365121
0.467	-0.000249731	-0.0082874	-0.000273035	-0.00480653	0.0060741	0.0025705	-0.001725	0.00777022	0.00286495	0.0101919	-0.0041149	0.00385386	0.00353034	0.00353296	0.00472251	0.00413007	0.0048158	0.00380067	0.00549758	0.00240845	0.00368776	0.00392808
0.468	4.55242e-05	-0.00799061	-0.000560539	-0.00463563	0.00595174	0.00263391	-0.0020895	0.00740116	0.00258422	0.0107077	-0.00447072	0.00399046	0.00354096	0.00367335	0.00476991	0.00411994	0.0049704	0.00376188	0.00548232	0.00255827	0.00381635	0.00419158
0.469	0.000350013	-0.00766902	-0.000818756	-0.00442603	0.00582406	0.0027731	-0.00251203	0.00707021	0.00231235	0.011082	-0.00472086	0.0041092	0.00355537	0.00379939	0.00482498	0.00412043	0.00509948	0.00375144	0.00543776	0.00275268	0.00398238	0.00442665
0.47	0.000639202	-0.00734301	-0.00105324	-0.00418228	0.00569397	0.00299938	-0.00295964	0.00679149	0.00209179	0.0113247	-0.00483155	0.00420137	0.00357154	0.00391246	0.00487049	0.00413735	0.0051937	0.00375684	0.00536422	0.00298658	0.00416939	0.00461947
0.471	0.00091984	-0.00700783	-0.0012637	-0.00390855	0.00556018	0.00329687	-0.00341859	0.00654251	0.00192714	0.0114078	-0.00482123	0.00426827	0.00358417	0.00401895	0.00489432	0.00417569	0.00524948	0.0037735	0.00526553	0.00325669	0.00435999	0.00476147
0.472	0.00118818	-0.00666168	-0.0014575	-0.00360902	0.00542347	0.00364675	-0.00386589	0.00630464	0.00182826	0.0113239	-0.00469873	0.00431362	0.00359005	0.00412627	0.00488937	0.00423832	0.00526795	0.0038036	0.00514821	0.00355909	0.00454175	0.00484815
0.473	0.00143655	-0.00630154	-0.00164598	-0.00328804	0.00528678	0.00402558	-0.00427376	0.00605948	0.00180372	0.0110788	-0.00447299	0.00434617	0.00358645	0.00424251	0.00485497	0.00432548	0.00525366	0.00385185	0.00501989	0.00388905	0.00470449	0.00487989
0.474	0.00166034	-0.00591998	-0.00184199	-0.00294879	0.00515363	0.00440367	-0.00461672	0.00578462	0.0018525	0.0106815	-0.00416142	0.00437589	0.00357319	0.0043741	0.00479585	0.00443514	0.005213	0.00392001	0.00488821	0.00424007	0.00484022	0.00485961
0.475	0.00185675	-0.00550726	-0.00205912	-0.00259379	0.00502777	0.0047483	-0.00487296	0.00545694	0.00196567	0.0101454	-0.00378693	0.0044125	0.00355143	0.0045237	0.00472013	0.00456365	0.00515262	0.00400316	0.00475974	0.00460295	0.00494287	0.00479348
0.476	0.00202243	-0.0050543	-0.00231109	-0.0022254	0.00491309	0.00502796	-0.00502434	0.00505771	0.00213015	0.00949127	-0.00337289	0.00446439	0.00352207	0.00468888	0.00463696	0.00470636	0.00507784	0.00408961	0.00463992	0.00496641	0.00500872	0.0046925
0.477	0.00215498	-0.00455326	-0.00261014	-0.00184562	0.00481296	0.0052147	-0.00505847	0.00457362	0.0023285	0.00874363	-0.00294332	0.00453643	0.00348633	0.0048621	0.00455412	0.00485839	0.00499179	0.00416238	0.00453301	0.00531791	0.00503624	0.00457136
0.478	0.00225313	-0.00399898	-0.00296594	-0.0014563	0.0047296	0.00528684	-0.00496965	0.00399872	0.00254052	0.00792977	-0.00252112	0.00462927	0.00344621	0.00503195	0.00447641	0.00501496	0.0048954	0.004203	0.00444259	0.00564472	0.00502621	0.00444775
0.479	0.00231687	-0.00339018	-0.00338461	-0.00105939	0.00466367	0.00523122	-0.0047593	0.00333556	0.00274507	0.00707791	-0.0021265	0.00473991	0.00340522	0.00518513	0.00440524	0.00517143	0.00478818	0.00419569	0.00437231	0.00593503	0.00498173	0.00434062
0.48	0.00233456	-0.00273814	-0.00387203	-0.000657402	0.00461544	0.00505028	-0.00442728	0.00260803	0.0029344	0.00623166	-0.00175806	0.00486113	0.00336898	0.00530836	0.0043388	0.00532249	0.00466941	0.00413062	0.0043249	0.00617736	0.00490961	0.00426661
0.481	0.0023068	-0.00205165	-0.00442571	-0.000252527	0.00458255	0.00475243	-0.00398599	0.00183855	0.00309362	0.00541975	-0.0014248	0.00498768	0.00334575	0.00539112	0.00427529	0.00546347	0.00453918	0.00400617	0.00430225	0.00636512	0.00481499	0.00423769
0.482	0.00224999	-0.00133703	-0.00503549	0.00015263	0.00455787	0.00434981	-0.00346488	0.00104206	0.00319513	0.00464871	-0.00114902	0.00511606	0.00334321	0.00542581	0.00421328	0.00558914	0.00439967	0.00383192	0.00430844	0.00649455	0.00470764	0.00425969
0.483	0.00217129	-0.000612237	-0.00568922	0.000554296	0.00453457	0.00386919	-0.00288866	0.000249883	0.00322888	0.0039347	-0.000932083	0.00524308	0.00336781	0.00540888	0.00415274	0.00569353	0.00425433	0.00362742	0.00434274	0.00656529	0.00459728	0.00432929
0.484	0.00208152	0.000103317	-0.00637089	0.000948841	0.00450406	0.00334309	-0.0022868	-0.000506089	0.00318676	0.00328514	-0.000773384	0.00536647	0.00342321	0.00534094	0.00409553	0.00577077	0.00410852	0.00341901	0.00439904	0.00657935	0.0044925	0.00443348
0.485	0.00199433	0.000789271	-0.00706154	0.00133258	0.0044568	0.00280732	-0.00169076	-0.00119587	0.00306364	0.0026996	-0.000670188	0.00548457	0.00350769	0.00522639	0.00404478	0.00581587	0.00396862	0.00323613	0.0044656	0.00654116	0.00439933	0.00455324
0.486	0.00192279	0.00142375	-0.00774071	0.0017017	0.00438421	0.00229953	-0.00112954	-0.00179154	0.00286091	0.00217429	-0.000614584	0.00559578	0.00361302	0.00507277	0.00400383	0.00582535	0.00384027	0.00310545	0.00452719	0.00645851	0.00432103	0.00466879
0.487	0.00187971	0.00198595	-0.00838759	0.00205278	0.00427925	0.00185533	-0.000628844	-0.0022707	0.0025844	0.00170141	-0.000595904	0.00569774	0.00372662	0.00488981	0.00397494	0.00579822	0.00372795	0.00304157	0.00456708	0.0063422	0.00425717	0.0047622
0.488	0.00187664	0.00245772	-0.00898223	0.00238312	0.00413739	0.00150528	-0.00020941	-0.00261846	0.00224376	0.00127058	-0.000601609	0.00578699	0.0038343	0.0046884	0.00395845	0.00573653	0.00363483	0.00304144	0.00456971	0.00620602	0.00420396	0.00481963
0.489	0.00192298	0.00282493	-0.00950667	0.00269098	0.00395739	0.00127227	0.000114308	-0.00282885	0.00185159	0.000870423	-0.000618256	0.00585921	0.00392302	0.00447963	0.00395277	0.00564561	0.00356323	0.00308662	0.00452316	0.00606656	0.00415512	0.00483257
0.49	0.00202109	0.00307621	-0.00994678	0.00297503	0.00374206	0.00117104	0.000337303	-0.0029022	0.00142565	0.000494389	-0.000627766	0.00590965	0.0039826	0.00427421	0.00395473	0.00553339	0.00351541	0.00315273	0.00442041	0.00594204	0.00410344	0.004798
0.491	0.002152	0.00319777	-0.0102948	0.00323287	0.00350198	0.00121312	0.000474097	-0.00283067	0.00100563	0.000158922	-0.000589696	0.00593206	0.00400832	0.00408151	0.0039605	0.0054095	0.00349433	0.00321709	0.00426023	0.00585079	0.00403986	0.00471916
0.492	0.00233682	0.00320411	-0.0105399	0.00346995	0.00324451	0.00138146	0.000517227	-0.00265689	0.000582765	-0.000165654	-0.000521245	0.00592562	0.00400175	0.00391028	0.00396824	0.00528369	0.00350239	0.00326541	0.00405284	0.00580957	0.00395873	0.00460614
0.493	0.00257303	0.00310616	-0.0106773	0.00368891	0.00298307	0.00165609	0.000478696	-0.00241193	0.000168755	-0.000483561	-0.000416732	0.00588995	0.00396878	0.00376795	0.00397648	0.00516277	0.00354102	0.00329297	0.00381382	0.00582921	0.00385739	0.00447381
0.494	0.00285662	0.00292204	-0.0107054	0.0038939	0.00273264	0.00200707	0.000372691	-0.0021335	-0.000229733	-0.000798039	-0.000276899	0.00582653	0.00391941	0.00366118	0.00398466	0.00504904	0.00360945	0.00330369	0.00356419	0.00591085	0.00373379	0.00433996
0.495	0.0031831	0.00267604	-0.0106247	0.00408966	0.00250851	0.00239665	0.0002139	-0.00186385	-0.000611902	-0.00111169	-0.000109554	0.00573858	0.00386574	0.00359597	0.00399239	0.00493931	0.00370345	0.00330774	0.00332855	0.0060452	0.00358591	0.00422364
0.496	0.00354513	0.0023956	-0.0104384	0.0042803	0.00232591	0.0027838	1.90607e-05	-0.00164404	-0.000978913	-0.00142254	7.54625e-05	0.00563096	0.00381932	0.00357702	0.00399845	0.00482537	0.00381459	0.00331707	0.003132	0.00621526	0.00341454	0.00414322
0.497	0.00393428	0.00211013	-0.0101514	0.00446929	0.00219817	0.003127	-0.000196155	-0.00151183	-0.00133527	-0.00172619	0.000264971	0.00550927	0.00378883	0.00360682	0.00400008	0.00469602	0.00393148	0.00334199	0.00299531	0.00639928	0.00322202	0.00411284
0.498	0.00434169	0.00184914	-0.00976949	0.00465898	0.00213538	0.00338763	-0.000418616	-0.00149864	-0.00168818	-0.00201646	0.000443436	0.00537906	0.00377821	0.00368455	0.00399277	0.00454001	0.00404162	0.00338885	0.00293051	0.00657462	0.00301252	0.00413972
0.499	0.00475881	0.00164026	-0.00929942	0.00485021	0.00214319	0.00353322	-0.000638935	-0.00162703	-0.0020467	-0.00228617	0.000594107	0.00524514	0.00378623	0.00380531	0.0039706	0.00434922	0.00413345	0.00345976	0.00293923	0.00672107	0.00279246	0.00422299
0.5	0.00517806	0.00150746	-0.00874798	0.00504205	0.00222197	0.00353999	-0.00085231	-0.00190877	-0.00242074	-0.00252807	0.000700219	0.00511129	0.00380745	0.00396017	0.00392713	0.00412144	0.00419817	0.00355421	0.0030153	0.00682317	0.0025711	0.00435444
0.501	0.0055712	0.00145666	-0.00812663	0.00522955	0.00237	0.00340513	-0.00104319	-0.00232414	-0.00279688	-0.00271061	0.000773526	0.0049798	0.00383339	0.00413718	0.00385555	0.00386334	0.00423126	0.003673	0.00314953	0.00687124	0.00235876	0.00452167
0.502	0.00594431	0.00150689	-0.00744029	0.00540931	0.00257493	0.00312307	-0.00122399	-0.00286859	-0.00319293	-0.00283925	0.000789784	0.00485275	0.00385667	0.00432161	0.00375212	0.00358951	0.00423205	0.00381563	0.00333451	0.00686282	0.00217241	0.00470979
0.503	0.00630543	0.00166844	-0.00669346	0.00557577	0.00281906	0.00269923	-0.00140969	-0.00352799	-0.0036257	-0.0029221	0.000727419	0.00473352	0.00387024	0.00449842	0.00361521	0.00332463	0.00420348	0.00398278	0.00356245	0.00680092	0.00203041	0.00490105
0.504	0.00665964	0.00194234	-0.00589144	0.00572181	0.00308036	0.00215131	-0.00161631	-0.00427364	-0.0041043	-0.00296528	0.00057425	0.00462525	0.00386925	0.0046528	0.00344563	0.00310081	0.004152	0.00417572	0.00382631	0.00669342	0.00194571	0.00507942
0.505	0.00701761	0.0023248	-0.00503891	0.00583978	0.00333262	0.00150385	-0.00186494	-0.0050723	-0.00463901	-0.00298227	0.000317628	0.00453224	0.0038515	0.00477142	0.00324684	0.0029513	0.00408607	0.00439401	0.00411758	0.00655158	0.00192145	0.00523211
0.506	0.00739192	0.00280576	-0.00414111	0.00592201	0.0035486	0.000787293	-0.00217651	-0.00588615	-0.0052363	-0.00298906	-4.98854e-05	0.00445999	0.00381726	0.00484316	0.00302479	0.00289892	0.00401377	0.00463175	0.00442377	0.00638876	0.00195029	0.00534841
0.507	0.00779725	0.00337065	-0.00320384	0.00596155	0.00370134	3.44787e-05	-0.00257145	-0.0066767	-0.00590038	-0.00300508	-0.000532222	0.00441456	0.00376948	0.0048599	0.00278772	0.00294526	0.00394155	0.00487756	0.00472933	0.0062185	0.00201693	0.00542118
0.508	0.0082493	0.00400155	-0.00223375	0.00595284	0.00376614	-0.000722377	-0.00306777	-0.00740765	-0.00663307	-0.00305204	-0.00112954	0.00440147	0.00371393	0.00481717	0.00254607	0.00306969	0.00387326	0.00511558	0.00501741	0.00605314	0.00210511	0.00544779
0.509	0.00876349	0.00467841	-0.00123855	0.00589229	0.00372248	-0.00145457	-0.00367935	-0.00804751	-0.00743374	-0.0031525	-0.00183814	0.00442447	0.00365947	0.00471459	0.00231273	0.00323969	0.00381007	0.00532762	0.00527225	0.00590286	0.00220363	0.00543086
0.51	0.00935373	0.0053804	-0.000227107	0.00577869	0.00355556	-0.00213939	-0.00441446	-0.00857194	-0.00829945	-0.00332832	-0.00265059	0.00448459	0.003618	0.0045562	0.00210354	0.00342359	0.00375131	0.00549583	0.00548157	0.00577541	0.00230938	0.00537889
0.511	0.0100212	0.00608087	0.000788716	0.00561233	0.00326016	-0.00275698	-0.00526728	-0.00895718	-0.00921379	-0.00358821	-0.00354307	0.00457988	0.00360408	0.00435058	0.0019371	0.00359805	0.00369587	0.00560567	0.00563853	0.00567701	0.00242644	0.00530697
0.512	0.0107577	0.00675259	0.00179472	0.00539665	0.00283999	-0.00329344	-0.00622115	-0.00918375	-0.0101517	-0.00393016	-0.00448126	0.00470451	0.00363245	0.00410985	0.0018335	0.00374923	0.00364467	0.00564721	0.00574322	0.00561316	0.00256993	0.00523739
0.513	0.0115875	0.00739054	0.00278292	0.00514011	0.0022982	-0.00376246	-0.00727887	-0.009274	-0.0111291	-0.00438836	-0.00547459	0.00485311	0.00371356	0.00384987	0.00180754	0.00387284	0.00359802	0.00561459	0.00580231	0.00558336	0.00274896	0.00518698
0.514	0.0125124	0.00798394	0.00374307	0.00485154	0.00164843	-0.00417824	-0.00842436	-0.00924633	-0.0121417	-0.00497355	-0.00651107	0.00501919	0.00385137	0.00358841	0.00186133	0.00397122	0.00355864	0.00550943	0.00582868	0.00558692	0.00297149	0.00517417
0.515	0.0135333	0.00852764	0.00466667	0.004541	0.000909186	-0.00456335	-0.00963922	-0.00913127	-0.0131891	-0.00569536	-0.00758361	0.00519753	0.00404216	0.00334356	0.00198249	0.00405027	0.00353056	0.00534107	0.00583959	0.00562208	0.00323951	0.00521421
0.516	0.0146459	0.00901997	0.00554622	0.00421943	0.000104063	-0.00494513	-0.0109007	-0.00896652	-0.0142699	-0.00655708	-0.00868426	0.00538469	0.00427391	0.0031309	0.00214934	0.00411608	0.00351739	0.00512385	0.00585249	0.00568396	0.0035462	0.00531133
0.517	0.0158425	0.00946295	0.00637607	0.00389768	-0.000740803	-0.00535329	-0.0121843	-0.00879549	-0.0153839	-0.0075574	-0.00980698	0.00557947	0.00452939	0.00296126	0.00233872	0.00417253	0.00352172	0.00487655	0.00588149	0.00576526	0.00387854	0.00545986
0.518	0.0171124	0.0098616	0.00715273	0.00358567	-0.0015987	-0.00581671	-0.0134658	-0.00866431	-0.0165312	-0.00869053	-0.0109477	0.00578263	0.00478945	0.0028393	0.00253061	0.00422012	0.00354476	0.00462063	0.00593418	0.005857	0.0042205	0.00564652
0.519	0.018442	0.010223	0.00787498	0.00329166	-0.00244432	-0.00636035	-0.0147219	-0.0086187	-0.0177122	-0.00994659	-0.012104	0.00599632	0.00503595	0.00276403	0.00270972	0.00425622	0.00358679	0.004378	0.00601016	0.00594989	0.00455611	0.00585453
0.52	0.0198159	0.0105552	0.00854383	0.00302163	-0.00325565	-0.00700234	-0.0159326	-0.00870086	-0.018927	-0.0113121	-0.0132754	0.00622294	0.00525383	0.0027313	0.00286556	0.00427653	0.00364804	0.00416847	0.00610193	0.00603589	0.00487174	0.00606775
0.521	0.0212164	0.0108658	0.00916221	0.00277893	-0.00401506	-0.00775142	-0.0170808	-0.0089459	-0.0201737	-0.01277	-0.0144609	0.00646402	0.00543253	0.00273691	0.00299205	0.00427736	0.00372959	0.00400746	0.00619771	0.00610987	0.00515766	0.00627374
0.522	0.0225993	0.0111463	0.00972958	0.00256331	-0.0047018	-0.00859151	-0.0181324	-0.00935785	-0.0214172	-0.0142693	-0.0156225	0.00672023	0.00556788	0.00277892	0.0030869	0.00425713	0.00383473	0.00390577	0.00628661	0.00617303	0.00541063	0.00646954
0.523	0.0239649	0.0114125	0.0102547	0.00237319	-0.00531819	-0.0095204	-0.0190968	-0.00996726	-0.0226752	-0.0158118	-0.0167878	0.00698705	0.00565725	0.00285568	0.00315109	0.00421885	0.00396536	0.00386393	0.00635628	0.00622479	0.00562716	0.00664739
0.524	0.025303	0.0116728	0.0107458	0.0022046	-0.00586843	-0.01052	-0.0199783	-0.0107853	-0.0239501	-0.0173869	-0.0179687	0.00725742	0.00570448	0.00296549	0.00318766	0.00417027	0.00412246	0.00387848	0.00639923	0.00626944	0.00580865	0.00680653
0.525	0.026606	0.0119334	0.0112106	0.00205173	-0.00636331	-0.0115634	-0.0207859	-0.0118122	-0.0252433	-0.0189847	-0.0191778	0.00752433	0.00571819	0.00310385	0.00320087	0.00412277	0.00430581	0.00394424	0.00641467	0.0063155	0.00596136	0.00695255
0.526	0.0278673	0.0121986	0.0116571	0.0019081	-0.00681829	-0.0126174	-0.0215326	-0.0130367	-0.0265537	-0.0205969	-0.0204268	0.00777847	0.00570981	0.00326213	0.00319504	0.00408895	0.00451086	0.00405415	0.00640543	0.00637001	0.00609186	0.00708984
0.527	0.0290832	0.0124714	0.012092	0.00176733	-0.00725274	-0.013646	-0.022235	-0.0144383	-0.0278799	-0.0222182	-0.0217276	0.00801055	0.00569287	0.00342825	0.00317379	0.00407976	0.00472915	0.00420099	0.00637777	0.0064376	0.00620691	0.00722202
0.528	0.0302522	0.0127537	0.0125209	0.00162396	-0.00768803	-0.0146132	-0.0229119	-0.0159883	-0.0292195	-0.0238462	-0.0230916	0.00821258	0.00568166	0.00358873	0.00313986	0.00410159	0.00494915	0.00437757	0.00633989	0.00651895	0.00631243	0.00735105
0.529	0.0313745	0.0130461	0.0129471	0.00147421	-0.00814551	-0.0154865	-0.0235826	-0.017652	-0.0305696	-0.025481	-0.0245285	0.0083789	0.00568956	0.00373125	0.00309529	0.0041547	0.00515793	0.00457645	0.00630035	0.00661031	0.00641302	0.0074771
0.53	0.0324518	0.0133484	0.0133722	0.00131661	-0.0086444	-0.0162397	-0.0242648	-0.0193902	-0.031926	-0.0271243	-0.0260458	0.00850685	0.0057274	0.00384708	0.0030422	0.00423356	0.005343	0.00478968	0.00626685	0.00670432	0.00651192	0.00759908
0.531	0.0334858	0.0136599	0.0137952	0.00115228	-0.00919996	-0.0168552	-0.0249735	-0.0211617	-0.0332833	-0.0287791	-0.0276472	0.00859692	0.00580177	0.00393275	0.00298368	0.00432899	0.0054941	0.00500879	0.00624546	0.00679167	0.00661137	0.00771554
0.532	0.0344615	0.0139698	0.0142093	0.000984932	-0.00981519	-0.0173166	-0.0257066	-0.0229094	-0.0346149	-0.0304279	-0.0293086	0.00865412	0.00591521	0.00399086	0.00292433	0.00443028	0.00560375	0.00522587	0.00624215	0.00686505	0.00671451	0.00782757
0.533	0.0353732	0.0142736	0.0146076	0.000820495	-0.0104925	-0.0176262	-0.0264659	-0.0245902	-0.0359063	-0.032065	-0.0310182	0.00868257	0.00606188	0.00402942	0.00287064	0.00452946	0.00567011	0.00543168	0.00625779	0.00691619	0.00682183	0.00793505
0.534	0.0362369	0.0145801	0.0149881	0.000667455	-0.0112341	-0.0178073	-0.0272644	-0.0261856	-0.0371701	-0.0337128	-0.0327898	0.0086854	0.00623014	0.00406003	0.00283005	0.00462069	0.00569452	0.005616	0.00629132	0.00693848	0.00693102	0.00803524
0.535	0.037058	0.0148926	0.015345	0.000535127	-0.0120315	-0.0178879	-0.0281015	-0.0276744	-0.0384046	-0.0353795	-0.0346203	0.00866953	0.00640513	0.00409505	0.00280995	0.00470165	0.00568342	0.00577181	0.00634318	0.00693311	0.00704409	0.00813274
0.536	0.0378393	0.0152154	0.0156731	0.000432848	-0.0128697	-0.0179042	-0.0289711	-0.0290423	-0.0396072	-0.03707	-0.0365016	0.00863868	0.00656843	0.00414433	0.00281583	0.00477218	0.00564576	0.00589204	0.00641109	0.00690351	0.00716013	0.0082298
0.537	0.0385833	0.0155536	0.0159677	0.000368904	-0.0137288	-0.0178977	-0.029863	-0.0302844	-0.0407763	-0.0387882	-0.0384237	0.00859437	0.00670063	0.00421236	0.00285	0.0048332	0.00559205	0.00597079	0.00649098	0.00685577	0.0072767	0.00832792
0.538	0.0392915	0.015913	0.0162254	0.000349409	-0.0145856	-0.0179128	-0.0307644	-0.0314046	-0.0419101	-0.0405359	-0.0403744	0.00853599	0.00678341	0.00429746	0.00291125	0.00488541	0.00553276	0.00600371	0.00657697	0.00679731	0.00738974	0.00842714
0.539	0.0399649	0.0163001	0.0164442	0.000377314	-0.0154152	-0.0179924	-0.0316601	-0.032415	-0.0430074	-0.0423128	-0.0423399	0.00846148	0.0068014	0.00439307	0.00299575	0.00492832	0.00547669	0.00598847	0.00666174	0.00673526	0.00749388	0.00852601
0.54	0.0406038	0.0167208	0.0166238	0.000451625	-0.0161929	-0.0181749	-0.0325342	-0.033335	-0.0440661	-0.0441161	-0.0443046	0.00836843	0.00674385	0.00449088	0.00309855	0.00495995	0.0054298	0.00592526	0.00673735	0.0066751	0.00758322	0.00862191
0.541	0.0412075	0.017181	0.0167658	0.000566951	-0.0168957	-0.0184908	-0.0333711	-0.0341891	-0.0450838	-0.0459401	-0.0462521	0.0082553	0.00660591	0.00458418	0.00321481	0.0049771	0.00539465	0.00581731	0.00679639	0.00661975	0.00765227	0.00871188
0.542	0.041771	0.0176827	0.0168725	0.000713819	-0.0175026	-0.0189578	-0.0341532	-0.0350012	-0.0460524	-0.0477709	-0.0481589	0.00812289	0.0063903	0.00467029	0.00334023	0.0049758	0.00536996	0.00567162	0.00683346	0.00656964	0.00769688	0.00879352
0.543	0.0422677	0.0182137	0.0169408	0.000878211	-0.0179905	-0.0195704	-0.0348488	-0.0357748	-0.0469359	-0.0495615	-0.0499703	0.00797477	0.00610724	0.00475181	0.00347056	0.00495313	0.00535201	0.00549905	0.00684722	0.0065233	0.00771606	0.00886838
0.544	0.0427165	0.0187901	0.0169838	0.00104203	-0.0183593	-0.020336	-0.0354653	-0.0365599	-0.0477562	-0.0513314	-0.0517016	0.00781129	0.00577172	0.00483564	0.0036022	0.00490732	0.00533625	0.00531008	0.0068345	0.0064739	0.00770744	0.00893175
0.545	0.0431243	0.0194168	0.0170107	0.00118587	-0.0186083	-0.0212411	-0.0360023	-0.037389	-0.0485164	-0.0530765	-0.0533483	0.00764028	0.00540782	0.00493012	0.00372932	0.00483848	0.00531712	0.00512044	0.00680019	0.00641798	0.00767579	0.00898636
0.546	0.0434968	0.0200968	0.0170314	0.00128932	-0.018743	-0.0222604	-0.0364622	-0.0382889	-0.0492179	-0.0547897	-0.0549064	0.0074678	0.00504417	0.00504136	0.00384401	0.00474875	0.00528871	0.00494479	0.00675027	0.00635127	0.00762621	0.00903345
0.547	0.0438418	0.0208325	0.0170563	0.00133283	-0.0187749	-0.0233604	-0.0368518	-0.0392813	-0.0498642	-0.0564654	-0.0563767	0.00729897	0.00471175	0.00517005	0.00393652	0.004642	0.00524542	0.00479567	0.00669202	0.00627049	0.00756499	0.00907362
0.548	0.0441687	0.0216254	0.017096	0.00129932	-0.0187201	-0.0245019	-0.0371821	-0.0403813	-0.05046	-0.0580993	-0.0577642	0.00713725	0.00443936	0.00530978	0.00399643	0.0045235	0.00518232	0.00468134	0.00663262	0.00617376	0.00749875	0.00910594
0.549	0.0444884	0.0224762	0.0171605	0.00117578	-0.0185984	-0.0256429	-0.0374671	-0.0415963	-0.0510118	-0.0596888	-0.059078	0.00698446	0.00424769	0.00544788	0.00401434	0.00439964	0.00509551	0.00460454	0.00657775	0.00606066	0.00743364	0.0091274
0.55	0.0448126	0.0233848	0.0172588	0.000954586	-0.0184313	-0.0267423	-0.0377226	-0.0429252	-0.0515273	-0.0612329	-0.0603305	0.00684159	0.00414397	0.00556814	0.00398383	0.00427774	0.00498257	0.00456275	0.00653074	0.00593226	0.00737477	0.00913302
0.551	0.0451533	0.0243497	0.0173981	0.000634496	-0.01824	-0.0277623	-0.0379654	-0.0443583	-0.0520152	-0.0627318	-0.0615364	0.00671017	0.00412035	0.00565457	0.00390331	0.00416597	0.00484306	0.00454988	0.00649246	0.005791	0.00732603	0.00911652
0.552	0.045522	0.0253681	0.0175836	0.000221112	-0.0180445	-0.0286715	-0.0382117	-0.0458776	-0.0524845	-0.0641867	-0.0627115	0.00659379	0.00415761	0.00569503	0.00377752	0.00407332	0.004679	0.00455872	0.00646195	0.00564069	0.00729008	0.00907138
0.553	0.0459057	0.0264222	0.0178093	-0.00027112	-0.0178549	-0.0294338	-0.0384585	-0.0474353	-0.052917	-0.0655665	-0.0638373	0.00649989	0.00423218	0.0056838	0.00361798	0.00400872	0.00449408	0.00458427	0.00643861	0.00548642	0.00726871	0.00899393
0.554	0.0463198	0.0275104	0.0180781	-0.000824817	-0.0176845	-0.0300406	-0.0387228	-0.0490058	-0.0533292	-0.0668838	-0.0649396	0.00643512	0.0043219	0.0056233	0.00344351	0.00398086	0.00429623	0.00462071	0.00641945	0.00533351	0.00726088	0.00887933
0.555	0.0467851	0.028632	0.0183921	-0.00141715	-0.017545	-0.030497	-0.0390249	-0.0505671	-0.0537462	-0.0681607	-0.0660516	0.00640991	0.00440949	0.00552548	0.00327762	0.0039957	0.00409485	0.00466804	0.00640527	0.00518995	0.00726711	0.00872751
0.556	0.0473115	0.0297798	0.0187474	-0.00202097	-0.0174401	-0.0308134	-0.0393744	-0.0520871	-0.0541814	-0.0694064	-0.0671915	0.00643208	0.00448262	0.00540951	0.00314377	0.00405485	0.00389983	0.00472645	0.00639767	0.00506331	0.00728535	0.00854182
0.557	0.0479072	0.0309452	0.0191375	-0.00260749	-0.0173689	-0.0310097	-0.039778	-0.0535353	-0.0546474	-0.0706312	-0.0683753	0.00650439	0.00453286	0.00529932	0.00305877	0.00415423	0.00372008	0.00479596	0.00639926	0.00496076	0.00731188	0.00832897
0.558	0.0485785	0.0321179	0.0195536	-0.00314839	-0.0173257	-0.0311131	-0.0402392	-0.054884	-0.0551559	-0.071845	-0.0696158	0.00662251	0.00455424	0.00521893	0.00302631	0.00428414	0.0035617	0.00487489	0.00641274	0.00488821	0.00734129	0.00809859
0.559	0.0493292	0.0332859	0.019985	-0.00361789	-0.0173015	-0.031156	-0.040758	-0.0561106	-0.0557164	-0.0730573	-0.0709212	0.00677479	0.00454234	0.00518694	0.00303485	0.00443073	0.00342662	0.00495914	0.00643966	0.00484944	0.00736687	0.00786226
0.56	0.0501602	0.0344357	0.0204189	-0.00399473	-0.0172845	-0.0311722	-0.0413314	-0.0571982	-0.0563356	-0.0742758	-0.0722946	0.00694423	0.00449418	0.00521162	0.00306187	0.00457823	0.00331234	0.00504238	0.00647945	0.00484562	0.00738124	0.00763245
0.561	0.0510693	0.0355524	0.0208413	-0.00426377	-0.0172613	-0.0311945	-0.0419534	-0.0581369	-0.0570163	-0.0755055	-0.0737335	0.0071116	0.00440875	0.00528918	0.00308164	0.00471133	0.00321288	0.00511707	0.00652901	0.00487528	0.00737739	0.00742133
0.562	0.0520511	0.0366199	0.0212375	-0.00441715	-0.0172184	-0.0312515	-0.0426152	-0.0589241	-0.0577575	-0.0767488	-0.0752289	0.00725889	0.00428814	0.00540583	0.00307241	0.00481712	0.00312079	0.00517601	0.00658303	0.00493484	0.00734966	0.00723976
0.563	0.0530863	0.0376165	0.0215885	-0.00445427	-0.0171417	-0.0313602	-0.0432979	-0.059556	-0.0585422	-0.0779916	-0.0767513	0.00737178	0.00413866	0.00554183	0.00302059	0.00488598	0.00302872	0.00521458	0.00663419	0.00501848	0.00729417	0.00709628
0.564	0.0541475	0.0385155	0.0218744	-0.00438266	-0.0170157	-0.0315227	-0.043975	-0.0600264	-0.0593397	-0.0792059	-0.0782555	0.00744177	0.00397214	0.0056777	0.00292258	0.00491311	0.0029322	0.00522862	0.00667633	0.00512184	0.00721041	0.00699902
0.565	0.0552443	0.0393133	0.0220914	-0.00421854	-0.0168377	-0.0317567	-0.0446529	-0.0603739	-0.0601649	-0.0804135	-0.0797521	0.0074681	0.00380375	0.00579789	0.00278555	0.00489907	0.00283029	0.00521951	0.006704	0.00523974	0.00710065	0.00695013
0.566	0.0563671	0.0399985	0.0222311	-0.00398259	-0.0166051	-0.0320592	-0.0453221	-0.0606257	-0.0610079	-0.0816092	-0.0812213	0.00745637	0.0036522	0.00589151	0.00262538	0.00484823	0.00272471	0.00519086	0.00671314	0.00536745	0.00696912	0.00695063
0.567	0.0575066	0.0405634	0.0222887	-0.00369944	-0.01632	-0.0324185	-0.045975	-0.0608138	-0.0618583	-0.0827874	-0.0826443	0.0074177	0.00353585	0.00595262	0.00246467	0.00476849	0.0026195	0.00514838	0.00670185	0.00550067	0.00682154	0.0069991
0.568	0.0586546	0.041004	0.0222636	-0.00339555	-0.0159884	-0.032816	-0.0466052	-0.0609726	-0.0627062	-0.0839416	-0.0840039	0.00736673	0.00346828	0.0059794	0.00232855	0.00467015	0.00252014	0.00509875	0.00667043	0.00563535	0.00666416	0.00709181
0.569	0.0598044	0.0413204	0.0221597	-0.0030969	-0.0156206	-0.0332272	-0.0472084	-0.0611368	-0.0635426	-0.0850655	-0.0852857	0.00731905	0.00345422	0.0059729	0.0022384	0.00456457	0.00243299	0.00504825	0.00662111	0.00576758	0.00650279	0.00722289
0.57	0.0609506	0.0415172	0.0219855	-0.00282672	-0.01523	-0.0336242	-0.0477818	-0.0613389	-0.0643601	-0.0861524	-0.0864787	0.00728855	0.00348844	0.00593594	0.00220494	0.00446284	0.00236519	0.00500173	0.00655758	0.00589354	0.00634219	0.00738451
0.571	0.0620895	0.0416032	0.0217538	-0.0026034	-0.0148324	-0.0339782	-0.0483242	-0.0616071	-0.0651532	-0.0871964	-0.0875762	0.00728518	0.0035584	0.00587253	0.00222517	0.00437461	0.00232506	0.00496195	0.00648463	0.0060096	0.0061858	0.00756734
0.572	0.0632186	0.0415912	0.021481	-0.00243879	-0.0144445	-0.0342619	-0.0488355	-0.0619636	-0.0659189	-0.0881917	-0.0885757	0.00731382	0.00364912	0.0057877	0.00228601	0.00430723	0.00232216	0.00492959	0.0064077	0.00611264	0.00603593	0.00776117
0.573	0.0643348	0.0414961	0.0211858	-0.00233721	-0.014083	-0.0344505	-0.0493148	-0.0624209	-0.066654	-0.0891309	-0.0894759	0.00737421	0.00374765	0.00568765	0.00237177	0.00426533	0.00236584	0.00490364	0.0063321	0.00619981	0.00589365	0.00795515
0.574	0.0654065	0.0413213	0.0208806	-0.00229383	-0.0137591	-0.0345114	-0.0497411	-0.0629587	-0.0673278	-0.0899758	-0.0902394	0.0074613	0.00384495	0.00557918	0.00246947	0.00425011	0.00246239	0.00488243	0.00626348	0.00627001	0.00576067	0.00813984
0.575	0.0664571	0.0410979	0.0205939	-0.00229713	-0.0134889	-0.0344451	-0.0501324	-0.063591	-0.0679672	-0.0907453	-0.0909075	0.00757215	0.00393863	0.00547332	0.00257439	0.00426234	0.00261436	0.00486268	0.00620861	0.00632454	0.00563998	0.00830827
0.576	0.067495	0.0408516	0.0203484	-0.00232828	-0.0132851	-0.0342547	-0.050497	-0.0643144	-0.0685879	-0.0914475	-0.0915047	0.00770182	0.00402919	0.00538076	0.00268512	0.00429974	0.00281509	0.00484243	0.00617231	0.00636566	0.00553327	0.00845325
0.577	0.0685257	0.0406065	0.020164	-0.00236221	-0.0131564	-0.0339508	-0.0508407	-0.0651153	-0.069204	-0.0920882	-0.0920528	0.00784671	0.00411837	0.00531202	0.0028014	0.00435793	0.00305023	0.00481883	0.00615803	0.00639731	0.00544266	0.00857039
0.578	0.0695545	0.0403863	0.0200572	-0.00237017	-0.0131077	-0.0335529	-0.0511695	-0.0659747	-0.0698316	-0.0926752	-0.0925756	0.00800433	0.00420684	0.00527517	0.00292098	0.00443055	0.00330013	0.00478856	0.00616701	0.00642493	0.0053695	0.00865755
0.579	0.0705858	0.0402123	0.0200394	-0.00232208	-0.0131398	-0.0330887	-0.0514897	-0.0668698	-0.0704874	-0.0932181	-0.0930976	0.00817265	0.00429284	0.00527373	0.00303813	0.00450947	0.00354303	0.00474779	0.00619774	0.00645501	0.00531388	0.0087147
0.58	0.0716222	0.0401027	0.0201162	-0.00218915	-0.0132496	-0.032592	-0.0518074	-0.0677757	-0.0711878	-0.0937267	-0.0936417	0.00834909	0.00437241	0.00530544	0.00314415	0.00458531	0.00375778	0.00469245	0.00624581	0.00649447	0.00527463	0.00874373
0.581	0.0726637	0.0400711	0.0202865	-0.00194636	-0.0134302	-0.0321003	-0.0521279	-0.0686669	-0.0719473	-0.0942109	-0.0942276	0.00852952	0.00444112	0.00536235	0.00322971	0.0046482	0.00392613	0.00461885	0.00630427	0.00654991	0.00524973	0.00874802
0.582	0.073707	0.0401262	0.0205422	-0.00157479	-0.0136713	-0.0316526	-0.0524557	-0.0695187	-0.0727769	-0.0946792	-0.0948706	0.00870783	0.0044967	0.00543243	0.00328791	0.00468885	0.00403453	0.00452467	0.00636452	0.00662671	0.00523715	0.00873193
0.583	0.0747443	0.0402701	0.0208685	-0.00106359	-0.0139598	-0.0312858	-0.0527936	-0.0703087	-0.0736829	-0.0951375	-0.0955787	0.00887606	0.00454153	0.00550195	0.00331727	0.00469945	0.00407507	0.00440988	0.00641739	0.00672776	0.00523553	0.00870007
0.584	0.0757457	0.0404894	0.0212409	-0.000410981	-0.0142771	-0.0310246	-0.0531296	-0.0710022	-0.0746465	-0.0955697	-0.0963287	0.00902344	0.00458424	0.00555723	0.00332325	0.00467396	0.00404634	0.00427856	0.006454	0.00685258	0.00524426	0.00865585
0.585	0.0766966	0.0407745	0.0216337	0.000376135	-0.0146065	-0.0308959	-0.0534634	-0.0715831	-0.0756604	-0.0959729	-0.097114	0.00914211	0.00464187	0.00558767	0.0033202	0.00461193	0.00395642	0.00413855	0.00646831	0.00699969	0.00526726	0.0086055
0.586	0.0776	0.041123	0.0220222	0.00127904	-0.014936	-0.0309287	-0.0538095	-0.0720618	-0.0767372	-0.0963689	-0.0979517	0.00922481	0.00473433	0.00558547	0.00332862	0.0045161	0.00381828	0.00400185	0.00645709	0.00716368	0.00530546	0.00855161
0.587	0.0784445	0.0415218	0.0223786	0.00227115	-0.0152524	-0.0311371	-0.0541709	-0.0724423	-0.0778696	-0.0967618	-0.0988347	0.00926584	0.00488147	0.00554621	0.0033702	0.00439292	0.00365085	0.00388357	0.00641952	0.00733636	0.0053608	0.00849625
0.588	0.0792196	0.0419561	0.0226766	0.00331861	-0.0155445	-0.0315262	-0.0545502	-0.0727358	-0.0790474	-0.0971556	-0.0997534	0.00926235	0.00509662	0.00546854	0.00346097	0.00425253	0.00347665	0.00379944	0.00635781	0.00750776	0.00543344	0.00844041
0.589	0.079917	0.0424106	0.0228937	0.00438243	-0.0158045	-0.0320918	-0.0549498	-0.0729595	-0.0802582	-0.0975539	-0.100697	0.00921454	0.0053821	0.00535371	0.00360501	0.00410815	0.00331838	0.00376234	0.00627677	0.0076672	0.00552088	0.0083842
0.59	0.0805314	0.0428707	0.0230126	0.00542098	-0.0160278	-0.0328211	-0.0553717	-0.0731352	-0.0814881	-0.0979605	-0.101653	0.00912556	0.00572835	0.00520509	0.00379253	0.00397477	0.00319446	0.00377894	0.0061832	0.00780441	0.00561778	0.00832722
0.591	0.0810609	0.0433236	0.0230231	0.00639271	-0.0162133	-0.0336926	-0.0558172	-0.0732875	-0.0827224	-0.0983788	-0.102611	0.00900085	0.00611678	0.00502789	0.00400321	0.00386735	0.00311473	0.00384786	0.0060849	0.00791049	0.00571666	0.00826896
0.592	0.0815078	0.043759	0.022923	0.00725886	-0.0163637	-0.0346783	-0.0562867	-0.0734421	-0.0839465	-0.0988121	-0.103561	0.00884737	0.0065245	0.00482917	0.00421237	0.00379843	0.00307841	0.00396041	0.00598965	0.00797876	0.00580912	0.0082091
0.593	0.0818779	0.0441695	0.0227182	0.00798578	-0.0164849	-0.0357446	-0.0567788	-0.0736229	-0.0851456	-0.0992625	-0.104494	0.00867263	0.0069289	0.00461801	0.00439665	0.00377577	0.00307586	0.00410303	0.00590428	0.00800516	0.00588731	0.00814755
0.594	0.0821751	0.0445472	0.0224222	0.00854684	-0.0165841	-0.0368513	-0.0572865	-0.0738457	-0.0863007	-0.0997244	-0.105394	0.00848244	0.00731014	0.00440561	0.00453751	0.00380078	0.00309307	0.00426032	0.00583359	0.00798829	0.00594413	0.00808345
0.595	0.0823901	0.0448795	0.0220531	0.00892802	-0.0166658	-0.0379499	-0.0577912	-0.0741053	-0.0873737	-0.100168	-0.106224	0.00828221	0.00765363	0.00420515	0.00462315	0.003869	0.00311888	0.00442294	0.00577852	0.00792913	0.00597693	0.008019
0.596	0.0825656	0.0451866	0.0216402	0.0091214	-0.0167493	-0.0390162	-0.0583059	-0.0744363	-0.0883859	-0.100624	-0.107021	0.00807882	0.007952	0.00403	0.00465092	0.00396963	0.00314556	0.00458048	0.0057404	0.00783405	0.00598517	0.00795556
0.597	0.0827267	0.0454802	0.0212156	0.00913	-0.0168498	-0.0400202	-0.0588298	-0.074849	-0.0893403	-0.1011	-0.107795	0.00787598	0.0082018	0.00389219	0.00462385	0.00408921	0.00317137	0.00472641	0.00571678	0.00771068	0.00597048	0.00789367
0.598	0.0828992	0.0457748	0.0208133	0.00896673	-0.0169822	-0.0409369	-0.0593614	-0.0753463	-0.0902434	-0.101601	-0.108559	0.00767707	0.00840356	0.00379914	0.00455034	0.0042133	0.00319992	0.00485677	0.00570347	0.00756843	0.00593638	0.00783343
0.599	0.0831087	0.0460869	0.0204665	0.00865312	-0.0171606	-0.0417482	-0.0598992	-0.0759255	-0.0911058	-0.102129	-0.109329	0.00748566	0.0085602	0.00375096	0.00444234	0.00432807	0.00323788	0.00496916	0.00569528	0.00741798	0.00588715	0.00777416
0.6	0.0833786	0.046434	0.020205	0.00821772	-0.0173968	-0.0424439	-0.0604417	-0.0765778	-0.0919413	-0.102687	-0.110123	0.00730619	0.00867554	0.00373953	0.00431343	0.00442122	0.00329257	0.00506179	0.00568678	0.00727066	0.00582697	0.00771448
0.601	0.0837284	0.0468329	0.020053	0.00769403	-0.0176997	-0.0430214	-0.0609877	-0.0772895	-0.092766	-0.103275	-0.110958	0.00714417	0.00875309	0.0037501	0.00417719	0.00448264	0.00336969	0.00513291	0.00567288	0.00713772	0.00575955	0.00765264
0.602	0.0841717	0.0472983	0.0200265	0.00711821	-0.0180746	-0.0434859	-0.0615357	-0.0780423	-0.0935967	-0.103889	-0.111847	0.00700585	0.00879542	0.00376469	0.00404612	0.00450478	0.00347215	0.00518053	0.00564926	0.00702963	0.00568812	0.00758698
0.603	0.0847139	0.0478405	0.0201325	0.00652659	-0.018522	-0.0438489	-0.0620837	-0.0788142	-0.0944485	-0.104522	-0.112802	0.00689727	0.00880415	0.00376584	0.00393142	0.004483	0.00360016	0.00520219	0.00561296	0.006955	0.00561592	0.00751635
0.604	0.0853504	0.048464	0.0203673	0.00595329	-0.0190376	-0.044127	-0.0626276	-0.07958	-0.0953325	-0.105162	-0.113825	0.00682285	0.00878038	0.00373962	0.00384322	0.00441574	0.00375212	0.00519507	0.00556278	0.00691962	0.00554681	0.00744042
0.605	0.0860505	0.0491572	0.0207143	0.00542979	-0.0196082	-0.0443316	-0.0631526	-0.0802988	-0.0962358	-0.105769	-0.114891	0.00678096	0.00872379	0.00367804	0.00379018	0.00430566	0.00392314	0.00515777	0.00549478	0.0069257	0.005483	0.00735866
0.606	0.0868058	0.0499212	0.0211517	0.00498087	-0.0202235	-0.0444907	-0.063663	-0.0809562	-0.0971736	-0.106339	-0.116007	0.00677226	0.00863896	0.00357753	0.00378087	0.00415843	0.0041098	0.00509082	0.00540996	0.00697103	0.00543281	0.00727465
0.607	0.0876041	0.0507527	0.0216515	0.00462328	-0.0208738	-0.0446353	-0.0641683	-0.0815433	-0.0981622	-0.106873	-0.117182	0.00678928	0.00853053	0.00344125	0.00381991	0.00398307	0.00430674	0.00499322	0.00531063	0.00704911	0.00540178	0.00719085
0.608	0.0884202	0.0516387	0.0221796	0.00436622	-0.0215445	-0.0447919	-0.0646717	-0.0820488	-0.0992028	-0.107362	-0.118412	0.00682206	0.00840507	0.00327731	0.0039063	0.00379196	0.00450759	0.00486613	0.00519905	0.00714909	0.00539516	0.00711041
0.609	0.0892265	0.0525622	0.0226996	0.00421091	-0.0222206	-0.0449839	-0.0651773	-0.0824666	-0.100293	-0.107799	-0.119687	0.00685935	0.00827063	0.00309778	0.00403196	0.00359974	0.00470442	0.00471205	0.00507805	0.00725714	0.00541592	0.00703647
0.61	0.0899951	0.0535028	0.0231755	0.00415111	-0.0228873	-0.0452309	-0.0656894	-0.0827965	-0.101424	-0.108182	-0.120997	0.0068906	0.00813588	0.00291735	0.00418191	0.00342213	0.00488786	0.00453522	0.00495077	0.00735821	0.00546374	0.00697191
0.611	0.0906998	0.0544382	0.0235745	0.00417409	-0.0235319	-0.0455463	-0.0662121	-0.0830439	-0.102585	-0.10851	-0.122331	0.00690794	0.00800896	0.00275174	0.00433637	0.00327413	0.00504772	0.00434213	0.00482038	0.00743786	0.00553482	0.00691931
0.612	0.0913184	0.0553453	0.0238695	0.00426201	-0.0241435	-0.045937	-0.0667486	-0.083219	-0.10376	-0.108787	-0.123676	0.00690744	0.00789641	0.00261603	0.00447386	0.00316788	0.0051741	0.00414233	0.00468995	0.00748397	0.00562262	0.00688095
0.613	0.0918331	0.0562004	0.0240412	0.00439344	-0.0247145	-0.0464018	-0.0672997	-0.0833357	-0.10493	-0.109022	-0.125019	0.00688969	0.00780246	0.00252294	0.00457444	0.00311071	0.00525902	0.00394908	0.00456259	0.00748826	0.00571943	0.00685901
0.614	0.0922311	0.0569795	0.0240789	0.00454488	-0.0252394	-0.0469315	-0.0678621	-0.083409	-0.10607	-0.109222	-0.126343	0.00685919	0.00772908	0.00248131	0.00462242	0.00310421	0.00529802	0.00377971	0.00444179	0.00744743	0.00581822	0.00685597
0.615	0.0925042	0.057662	0.0239818	0.00469367	-0.0257176	-0.0475066	-0.0684302	-0.0834533	-0.107153	-0.109394	-0.127627	0.00682229	0.00767351	0.00249557	0.00460792	0.00314418	0.00528861	0.00365492	0.00432812	0.00736201	0.00591192	0.00687103
0.616	0.0926423	0.0582234	0.0237563	0.00481883	-0.0261465	-0.0480974	-0.0689851	-0.0834742	-0.108136	-0.10953	-0.128836	0.00678897	0.0076317	0.00256354	0.00452857	0.00322241	0.00523422	0.00359625	0.0042233	0.00723681	0.00599778	0.00690399
0.617	0.0926842	0.0586692	0.0234295	0.00490321	-0.0265383	-0.0486899	-0.0695364	-0.0835113	-0.109028	-0.109679	-0.129993	0.00676852	0.00760029	0.00268087	0.00438922	0.00333105	0.00514459	0.00361713	0.00413433	0.00708261	0.0060767	0.00695291
0.618	0.0926556	0.0589981	0.0230314	0.00493287	-0.0269026	-0.0492575	-0.0700772	-0.0835854	-0.109817	-0.109863	-0.131095	0.00676719	0.00757405	0.00283866	0.00420206	0.00346083	0.00503288	0.00371992	0.00406623	0.0069124	0.00615118	0.00701376
0.619	0.0925884	0.0592144	0.0225983	0.00489871	-0.0272508	-0.0497738	-0.0705986	-0.0837148	-0.110497	-0.110104	-0.13214	0.00678767	0.00754756	0.00302546	0.00398539	0.00360291	0.00491491	0.0038935	0.00402452	0.00674029	0.00622514	0.0070807
0.62	0.0925179	0.0593278	0.0221698	0.00479679	-0.0275944	-0.0502137	-0.0710908	-0.0839143	-0.111065	-0.110421	-0.133131	0.00682908	0.00751557	0.0032283	0.00376158	0.00374904	0.00480685	0.00411628	0.00401475	0.00657974	0.00630273	0.00714673
0.621	0.0924804	0.0593524	0.0217858	0.00462832	-0.0279442	-0.050556	-0.0715434	-0.0841943	-0.111527	-0.110828	-0.134068	0.00688793	0.00747318	0.00343358	0.00355411	0.00389135	0.00472258	0.00436176	0.00404157	0.00644185	0.00638719	0.00720479
0.622	0.0925097	0.0593059	0.0214836	0.00439922	-0.0283087	-0.0507843	-0.0719452	-0.0845599	-0.111891	-0.111334	-0.13495	0.00695978	0.00741609	0.00362815	0.00338365	0.00402243	0.00467142	0.00460362	0.00410784	0.00633428	0.00648018	0.00724897
0.623	0.0926333	0.0592069	0.0212945	0.00411942	-0.0286931	-0.0508882	-0.0722851	-0.0850096	-0.112168	-0.111938	-0.135777	0.00704051	0.0073411	0.00380038	0.00326405	0.00413561	0.00465718	0.00481928	0.00421379	0.00626122	0.00658164	0.00727615
0.624	0.0928675	0.0590728	0.0212409	0.00380188	-0.0290975	-0.0508629	-0.0725504	-0.085534	-0.112369	-0.112631	-0.136541	0.00712706	0.00724699	0.00394134	0.00319977	0.00422555	0.00467904	0.0049922	0.00435689	0.00622442	0.00669023	0.00728791
0.625	0.0932267	0.0589261	0.0213379	0.00346153	-0.0295207	-0.0507144	-0.0727355	-0.0861251	-0.112515	-0.1134	-0.13724	0.00722017	0.00713168	0.00404474	0.00318624	0.00428808	0.00473006	0.0051091	0.00453015	0.00622197	0.00680212	0.0072843
0.626	0.0936831	0.058767	0.0215796	0.00311347	-0.0299472	-0.050438	-0.0728123	-0.086744	-0.11259	-0.114188	-0.137828	0.00731885	0.00699376	0.0041076	0.00321303	0.00432095	0.00480152	0.00516231	0.00472387	0.00624971	0.00691199	0.00726725
0.627	0.0942455	0.0586228	0.0219656	0.002774	-0.0303723	-0.0500635	-0.0727941	-0.0873883	-0.112635	-0.114994	-0.138324	0.00742572	0.00683805	0.00413074	0.00326866	0.00432736	0.00488866	0.00515388	0.00492702	0.0063042	0.00701739	0.00724755
0.628	0.0948983	0.0585094	0.0224806	0.00245761	-0.030785	-0.0496179	-0.072688	-0.0880437	-0.112674	-0.115797	-0.138731	0.00753932	0.00666972	0.00411908	0.00334266	0.00431275	0.00498711	0.00508952	0.00512758	0.00638237	0.00711589	0.00723252
0.629	0.0956124	0.0584355	0.0230989	0.0021761	-0.0311713	-0.0491299	-0.0725004	-0.0886918	-0.112724	-0.116571	-0.139047	0.00765599	0.00649504	0.00407938	0.00342681	0.00428558	0.00509354	0.0049801	0.00531311	0.00647932	0.00720502	0.0072284
0.63	0.0963516	0.0584058	0.0237887	0.00193816	-0.0315163	-0.0486303	-0.0722418	-0.0893149	-0.112798	-0.117291	-0.139271	0.00776935	0.00632092	0.00401954	0.00351435	0.00425694	0.00520505	0.00484073	0.00547193	0.0065887	0.00728293	0.00723851
0.631	0.0970753	0.0584198	0.0245141	0.00174889	-0.0318066	-0.0481498	-0.0719256	-0.0898976	-0.112904	-0.117938	-0.139406	0.00787099	0.00615418	0.00394724	0.00359892	0.00423916	0.0053184	0.0046897	0.00559397	0.00670272	0.00734851	0.00726251
0.632	0.0977418	0.0584729	0.0252384	0.0016096	-0.0320306	-0.0477165	-0.0715681	-0.0904271	-0.113047	-0.118495	-0.139457	0.00795182	0.00600083	0.00386881	0.00367402	0.00424393	0.00542947	0.00454718	0.00567152	0.00681261	0.00740164	0.00729668
0.633	0.0983098	0.0585555	0.025926	0.00151768	-0.0321797	-0.0473541	-0.0711861	-0.090893	-0.113223	-0.118953	-0.139432	0.00800377	0.00586583	0.00378872	0.00373348	0.00428005	0.00553357	0.00443341	0.00570009	0.00690987	0.00744361	0.00733546
0.634	0.0987389	0.0586513	0.0265444	0.00146643	-0.0322485	-0.0470779	-0.0707943	-0.091285	-0.113422	-0.119307	-0.139336	0.00802129	0.00575384	0.00371007	0.00377255	0.0043516	0.00562649	0.0043669	0.00567952	0.00698895	0.00747748	0.00737471
0.635	0.0990076	0.0587497	0.0270721	0.00144713	-0.0322388	-0.0469023	-0.070415	-0.0916069	-0.113637	-0.119568	-0.13919	0.00800237	0.00566443	0.00363311	0.00378938	0.00445593	0.0057025	0.00435849	0.00561169	0.00704121	0.0075076	0.0074057
0.636	0.0990796	0.0588226	0.0274876	0.00144795	-0.0321499	-0.0468193	-0.070049	-0.0918443	-0.113831	-0.119727	-0.138985	0.00794755	0.00559516	0.00355846	0.00378626	0.0045839	0.00575659	0.0044109	0.00550298	0.00706098	0.0075394	0.00742006
0.637	0.0989453	0.0588493	0.0277838	0.00145501	-0.0319907	-0.0468245	-0.0697077	-0.0919991	-0.113981	-0.119798	-0.13873	0.00786327	0.00554348	0.00348799	0.00377022	0.00472408	0.00578965	0.00452204	0.0053645	0.00704761	0.00757868	0.00741926
0.638	0.0986298	0.0588252	0.0279703	0.00145488	-0.0317806	-0.0469172	-0.0694187	-0.0920988	-0.114094	-0.119832	-0.13847	0.00775885	0.00550581	0.00342636	0.00375198	0.00486215	0.00580322	0.00468336	0.00521051	0.0070063	0.00763276	0.00740433
0.639	0.0981526	0.0587368	0.0280598	0.00143331	-0.0315366	-0.0470824	-0.069192	-0.0921576	-0.114158	-0.119862	-0.138226	0.00764415	0.00547604	0.00337926	0.0037437	0.00498318	0.00579985	0.00488104	0.00505741	0.00694239	0.0077063	0.00737774
0.64	0.0975438	0.0585731	0.0280727	0.00137683	-0.0312774	-0.0473008	-0.069034	-0.0921915	-0.114161	-0.119919	-0.138016	0.00752856	0.00544682	0.0033531	0.00375538	0.00507368	0.00578263	0.00509961	0.00492216	0.00686241	0.00780121	0.00734299
0.641	0.0968419	0.0583267	0.0280352	0.00127364	-0.0310218	-0.0475512	-0.0689474	-0.0922171	-0.114094	-0.120033	-0.137856	0.00741948	0.00541036	0.00335347	0.00379116	0.0051227	0.00575423	0.00532403	0.00481998	0.00677303	0.00791606	0.00730404
0.642	0.0960904	0.0579937	0.0279768	0.00111432	-0.0307869	-0.047812	-0.0689314	-0.09225	-0.113954	-0.120231	-0.137757	0.00732147	0.00535963	0.00338354	0.00384707	0.00512264	0.00571619	0.00554116	0.00476187	0.00667998	0.0080462	0.00726502
0.643	0.0953342	0.0575739	0.0279272	0.00089247	-0.030587	-0.0480626	-0.0689811	-0.0923029	-0.113739	-0.120527	-0.137722	0.00723598	0.00528995	0.00344313	0.00391149	0.00506977	0.00566868	0.0057406	0.00475287	0.0065878	0.0081847	0.00723084
0.644	0.0946114	0.0570681	0.0279133	0.000605207	-0.0304308	-0.048283	-0.0690855	-0.0923805	-0.11345	-0.120926	-0.137743	0.00716135	0.00520177	0.00352919	0.00396786	0.00496506	0.00561105	0.0059153	0.00479308	0.00650137	0.00832451	0.00721058
0.645	0.0939676	0.0564888	0.0279615	0.000253619	-0.0303252	-0.0484645	-0.0692405	-0.0924953	-0.1131	-0.121431	-0.13782	0.00709725	0.00509606	0.00363514	0.00399857	0.00481173	0.00554105	0.00606008	0.00487189	0.00641878	0.00845658	0.00720435
0.646	0.0934285	0.055845	0.028088	-0.000156782	-0.0302674	-0.0485972	-0.0694312	-0.0926429	-0.112693	-0.122019	-0.137931	0.00704153	0.00498059	0.00375404	0.00398845	0.00461692	0.00545649	0.00617284	0.00497653	0.0063389	0.0085737	0.00721542
0.647	0.0929877	0.0551339	0.0282959	-0.000617526	-0.030242	-0.0486666	-0.0696227	-0.0927923	-0.112207	-0.122628	-0.138012	0.00699292	0.00486757	0.00387948	0.00392723	0.00439144	0.00535647	0.00625371	0.00509051	0.00625839	0.00866952	0.00724542
0.648	0.0926834	0.0543911	0.0285964	-0.00111592	-0.0302488	-0.0486929	-0.0698298	-0.0929641	-0.111695	-0.123264	-0.138084	0.0069515	0.0047742	0.00400854	0.00381267	0.00415214	0.00524303	0.00630637	0.00520213	0.00618027	0.00874576	0.00730254
0.649	0.0925178	0.0536399	0.0289848	-0.00163597	-0.0302737	-0.048689	-0.0700467	-0.0931509	-0.111181	-0.123896	-0.13813	0.00691708	0.00471615	0.00413857	0.00364893	0.00391579	0.00511791	0.00633436	0.00529957	0.00610432	0.00880391	0.00738751
0.65	0.0924803	0.0529042	0.0294484	-0.00215929	-0.0302992	-0.0486711	-0.0702683	-0.0933407	-0.110683	-0.124484	-0.13813	0.00688915	0.00470445	0.004268	0.00344685	0.00369975	0.00498364	0.00634138	0.00537303	0.00603005	0.00884716	0.0074969
0.651	0.0925506	0.052208	0.0299677	-0.00266585	-0.0303063	-0.0486578	-0.0704911	-0.0935195	-0.110221	-0.124989	-0.138069	0.00686618	0.0047418	0.00439554	0.00322276	0.0035198	0.00484306	0.00633065	0.00541522	0.00595654	0.00887965	0.0076228
0.652	0.0927014	0.051575	0.0305191	-0.00313488	-0.0302759	-0.0486687	-0.0707136	-0.0936728	-0.109811	-0.125377	-0.137933	0.0068452	0.00482128	0.00451941	0.00299652	0.00338754	0.00469896	0.0063046	0.00542135	0.00588237	0.00890572	0.00775354
0.653	0.0929004	0.0510266	0.0310757	-0.00354605	-0.0301905	-0.048722	-0.0709355	-0.0937859	-0.109464	-0.125618	-0.137716	0.00682205	0.00492817	0.00463694	0.00278856	0.00330797	0.00455431	0.00626478	0.00538956	0.00580598	0.00892933	0.00787575
0.654	0.0931085	0.0505781	0.0316085	-0.00388067	-0.0300341	-0.0488303	-0.0711531	-0.0938404	-0.109183	-0.125684	-0.137411	0.00679258	0.00504438	0.00474458	0.00261627	0.00327879	0.00441336	0.00621167	0.00532332	0.00572822	0.0089552	0.00797946
0.655	0.0933011	0.0502484	0.0320949	-0.00412224	-0.0297982	-0.0490079	-0.0713737	-0.093833	-0.10898	-0.125572	-0.137035	0.00675151	0.00515032	0.0048377	0.00249072	0.00328958	0.00428064	0.00614704	0.00522263	0.00564512	0.00898333	0.00804853
0.656	0.0934522	0.0500475	0.032513	-0.00425808	-0.0294774	-0.04926	-0.0715989	-0.0937574	-0.108853	-0.125286	-0.136601	0.00669502	0.00523103	0.00491201	0.00241453	0.00332621	0.00416397	0.00607241	0.0050937	0.0055568	0.0090147	0.00807502
0.657	0.0935128	0.0499619	0.0328375	-0.00427941	-0.0290618	-0.0495702	-0.0718054	-0.0935816	-0.108761	-0.124797	-0.136085	0.00661821	0.00527585	0.00496228	0.00238326	0.00337182	0.00407284	0.00598838	0.00494378	0.00546098	0.00904617	0.00805022
0.658	0.0934876	0.0499983	0.0330626	-0.00418429	-0.0285621	-0.0499395	-0.072004	-0.0933215	-0.108712	-0.124148	-0.135533	0.00652367	0.00528332	0.00498821	0.00238914	0.00341277	0.0040212	0.00589903	0.00478521	0.00536404	0.00907993	0.00798025
0.659	0.093392	0.0501591	0.0331882	-0.0039747	-0.0279937	-0.0503628	-0.0722049	-0.0929998	-0.108715	-0.123398	-0.134995	0.0064143	0.00525507	0.00498985	0.00242531	0.00343721	0.00402146	0.00580641	0.00463378	0.00527188	0.00911688	0.00787216
0.66	0.0932389	0.0504337	0.0332169	-0.00365871	-0.027372	-0.0508232	-0.0724064	-0.0926305	-0.108761	-0.12259	-0.134505	0.00629464	0.00519763	0.00496914	0.00248812	0.00343587	0.00408118	0.00571273	0.00450461	0.00518937	0.00915665	0.00773614
0.661	0.0930503	0.0508063	0.0331572	-0.00324974	-0.0267156	-0.0513002	-0.0726049	-0.0922312	-0.108839	-0.121775	-0.134096	0.00617069	0.00512007	0.00492983	0.00257652	0.0034029	0.00420015	0.00561925	0.00441162	0.00512043	0.00919845	0.00758461
0.662	0.0928552	0.0512574	0.0330219	-0.00276593	-0.0260446	-0.0517716	-0.0727952	-0.0918222	-0.10894	-0.121002	-0.133796	0.00604932	0.00503205	0.00487712	0.00268984	0.00333623	0.00436935	0.00552592	0.00436538	0.00506731	0.00924117	0.00743082
0.663	0.0926864	0.0517642	0.0328266	-0.00222928	-0.0253796	-0.0522148	-0.0729709	-0.0914247	-0.109055	-0.120318	-0.133628	0.0059379	0.00494229	0.00481702	0.00282562	0.00323785	0.00457276	0.00543133	0.00437118	0.00503055	0.00928357	0.00728781
0.664	0.092572	0.0522988	0.0325869	-0.00166422	-0.0247385	-0.0526062	-0.0731199	-0.0910532	-0.109169	-0.119754	-0.133597	0.00584445	0.00485885	0.00475558	0.00297862	0.00311465	0.00479095	0.00533288	0.00442973	0.00501171	0.00932691	0.00717135
0.665	0.0925503	0.0528411	0.0323209	-0.00109687	-0.0241407	-0.0529318	-0.0732403	-0.0907347	-0.109284	-0.119349	-0.133719	0.00577488	0.00478514	0.00469862	0.00314101	0.00297632	0.00500372	0.00522806	0.004532	0.0050072	0.00936704	0.00708683
0.666	0.0926481	0.053368	0.032043	-0.000553092	-0.0236002	-0.0531788	-0.0733256	-0.0904855	-0.109393	-0.119119	-0.133988	0.00573433	0.00472477	0.00465073	0.00330432	0.00283703	0.00519384	0.00511444	0.00466743	0.0050166	0.00940323	0.0070425
0.667	0.09287	0.0538506	0.0317591	-5.61779e-05	-0.0231231	-0.0533334	-0.0733608	-0.090304	-0.10948	-0.119049	-0.13437	0.00572245	0.00468077	0.00461354	0.00346099	0.00271271	0.00534811	0.00498989	0.0048238	0.00504	0.00943389	0.0070429
0.668	0.093204	0.0542589	0.0314714	0.000373341	-0.0227093	-0.0533835	-0.0733251	-0.0901745	-0.109517	-0.1191	-0.134806	0.00573911	0.00465777	0.00458838	0.00360624	0.00261825	0.00545679	0.00485476	0.00498555	0.00507593	0.00945803	0.00709104
0.669	0.0936799	0.0546036	0.0311923	0.000717016	-0.0223699	-0.0533524	-0.0732443	-0.0901341	-0.109544	-0.119293	-0.135318	0.00578122	0.00466241	0.00457569	0.00374002	0.00256644	0.00551749	0.00471098	0.0051428	0.00513203	0.00947972	0.00719198
0.67	0.0942858	0.0548812	0.0309199	0.00096343	-0.0221031	-0.0532519	-0.0731218	-0.0901813	-0.109567	-0.119596	-0.135871	0.00583993	0.00470056	0.00457241	0.00386532	0.00256004	0.00553024	0.0045616	0.00528437	0.00521126	0.00949952	0.00734328
0.671	0.0949991	0.0550942	0.0306483	0.00110715	-0.0219039	-0.0530982	-0.0729642	-0.0903092	-0.109591	-0.11997	-0.136432	0.00590334	0.00477564	0.00457355	0.00398768	0.00259279	0.00549805	0.00441051	0.00540044	0.00531467	0.00951672	0.00753732
0.672	0.0957887	0.0552513	0.0303681	0.00114891	-0.0217646	-0.0529104	-0.07278	-0.0905062	-0.109624	-0.120369	-0.136964	0.00595808	0.00488623	0.00457268	0.00411356	0.00265239	0.00542596	0.00426188	0.00548283	0.00544039	0.00952881	0.00776132
0.673	0.0966166	0.0553663	0.030068	0.00109536	-0.0216764	-0.0527088	-0.0725797	-0.0907568	-0.109671	-0.120747	-0.137438	0.00599115	0.00502475	0.00456258	0.00424824	0.0027254	0.00532027	0.00411977	0.0055254	0.00558356	0.00953135	0.00799856
0.674	0.0974352	0.0554535	0.0297349	0.000957783	-0.0216282	-0.0525103	-0.0723698	-0.0910362	-0.109732	-0.121052	-0.137816	0.00599485	0.00517955	0.00453612	0.00439394	0.00280151	0.00518802	0.00398703	0.005526	0.00574013	0.00952021	0.00823235
0.675	0.0982105	0.0555377	0.0293589	0.000752971	-0.0216132	-0.0523358	-0.0721674	-0.0913319	-0.10982	-0.121256	-0.138089	0.00595904	0.00533111	0.00448662	0.00454967	0.00287645	0.00503691	0.00386825	0.00548254	0.0058981	0.00948639	0.00844174
0.676	0.0989047	0.0556409	0.028931	0.000500017	-0.0216242	-0.0521999	-0.0719833	-0.0916244	-0.109939	-0.121333	-0.138247	0.00588087	0.00546031	0.00440894	0.00471063	0.002952	0.00487553	0.00376737	0.00539778	0.00604958	0.00942365	0.0086112
0.677	0.0994842	0.0557828	0.0284447	0.000219298	-0.0216557	-0.0521112	-0.0718251	-0.0918928	-0.110089	-0.121265	-0.138286	0.00576201	0.00554906	0.00429986	0.00486951	0.00303439	0.00471345	0.00368851	0.00527837	0.00618858	0.00932743	0.0087295
0.678	0.0998875	0.0559566	0.027886	-6.87631e-05	-0.0216955	-0.0520541	-0.0716702	-0.0920822	-0.110227	-0.120998	-0.138157	0.00560339	0.00558072	0.00415712	0.00501753	0.0031298	0.00456036	0.00363561	0.00513271	0.00630756	0.00919301	0.00878823
0.679	0.100135	0.0561976	0.0272685	-0.000346259	-0.0217513	-0.0520443	-0.0715461	-0.0922101	-0.110388	-0.120585	-0.137924	0.0054242	0.00554917	0.00398461	0.00514775	0.00324436	0.00442696	0.00361202	0.00497273	0.00640766	0.00902377	0.0087919
0.68	0.100235	0.0565204	0.0266017	-0.000598881	-0.0218292	-0.0520812	-0.0714609	-0.0922777	-0.110582	-0.120065	-0.137628	0.00523948	0.00545152	0.00378719	0.00525463	0.00337821	0.00432231	0.00361968	0.00481458	0.00649281	0.0088265	0.00874759
0.681	0.1002	0.0569281	0.0258971	-0.00081646	-0.0219355	-0.0521559	-0.0714135	-0.0922824	-0.110808	-0.119474	-0.137303	0.00506562	0.00529154	0.00357181	0.00533507	0.00352422	0.00425169	0.0036579	0.00467248	0.00656625	0.00861019	0.00866763
0.682	0.10005	0.0574167	0.0251692	-0.000994178	-0.0220784	-0.0522563	-0.0713993	-0.0922256	-0.111066	-0.118858	-0.136987	0.0049181	0.00507933	0.00334712	0.00538866	0.00366955	0.00421513	0.00372302	0.00455829	0.0066318	0.00838631	0.00856755
0.683	0.0998159	0.0579753	0.0244344	-0.00113292	-0.0222668	-0.0523681	-0.0714113	-0.0921128	-0.111353	-0.118267	-0.136718	0.00480944	0.00483067	0.00312278	0.00541743	0.00379837	0.00420702	0.0038086	0.00447967	0.00669322	0.00816767	0.00846401
0.684	0.0995239	0.0585818	0.0237085	-0.00123975	-0.0225079	-0.052473	-0.071435	-0.0919457	-0.111658	-0.117741	-0.136523	0.00475064	0.004568	0.00290912	0.00542497	0.00389519	0.00421735	0.0039052	0.00444198	0.00675607	0.00796885	0.00837428
0.685	0.0992157	0.0592178	0.0230095	-0.00132548	-0.0228124	-0.0525612	-0.0714663	-0.0917415	-0.111982	-0.117336	-0.136439	0.00474266	0.00431133	0.00271468	0.00541633	0.0039474	0.00423422	0.0040049	0.00444036	0.00682093	0.00779912	0.00830869
0.686	0.0989252	0.059857	0.0223523	-0.00140528	-0.0231869	-0.052621	-0.0714957	-0.0915117	-0.11232	-0.117089	-0.13649	0.00478591	0.0040825	0.00254656	0.00539669	0.00394769	0.00424651	0.00409935	0.00446918	0.0068904	0.00766661	0.00827462
0.687	0.0986809	0.0604712	0.0217491	-0.00149675	-0.023636	-0.0526438	-0.0715149	-0.0912677	-0.11266	-0.11703	-0.136686	0.0048786	0.00389984	0.00240911	0.00537097	0.00389525	0.00424637	0.0041817	0.0045216	0.00696712	0.007576	0.0082745
0.688	0.0984776	0.0610162	0.0212002	-0.00161885	-0.0241542	-0.0526125	-0.0714986	-0.090994	-0.112967	-0.11714	-0.136993	0.0050135	0.00377333	0.00230224	0.00534296	0.00379554	0.00422961	0.00424767	0.00458981	0.00705295	0.00752697	0.00830343
0.689	0.0983265	0.0614659	0.0207113	-0.00178857	-0.0247385	-0.0525244	-0.0714411	-0.0906947	-0.113224	-0.117416	-0.137397	0.00518942	0.00370705	0.00222349	0.00531607	0.00366132	0.00419823	0.0042941	0.00466638	0.00714608	0.00751435	0.0083568
0.69	0.0982596	0.061817	0.0202916	-0.00202049	-0.0253904	-0.0523968	-0.0713652	-0.0904047	-0.113452	-0.117883	-0.13792	0.0054024	0.0036993	0.00216934	0.00529339	0.00351109	0.00415736	0.00432026	0.00474905	0.00725197	0.00753728	0.00842965
0.691	0.0982717	0.0620568	0.0199396	-0.00232477	-0.0261019	-0.0522376	-0.0712767	-0.0901282	-0.113641	-0.118516	-0.138535	0.00564488	0.00374238	0.00213394	0.00527688	0.00336473	0.00411363	0.00432675	0.00483319	0.00736985	0.00758945	0.00851421
0.692	0.0983486	0.06218	0.0196513	-0.00270602	-0.0268615	-0.0520572	-0.071185	-0.0898656	-0.113782	-0.119281	-0.139211	0.00590716	0.00382756	0.00211207	0.0052677	0.00324027	0.00407249	0.00431526	0.00491381	0.00749629	0.00766329	0.00860227
0.693	0.0984686	0.0621891	0.0194206	-0.00316255	-0.0276552	-0.0518673	-0.0711023	-0.0896139	-0.113867	-0.120132	-0.139912	0.00617786	0.00394728	0.00210094	0.00526607	0.0031495	0.0040359	0.00428821	0.00498537	0.00762504	0.00775041	0.00868544
0.694	0.098599	0.0620905	0.0192386	-0.00368667	-0.0284651	-0.0516762	-0.0710366	-0.0893612	-0.113881	-0.121013	-0.140589	0.00644613	0.00409645	0.00210317	0.00527083	0.00309509	0.00400236	0.00424617	0.00504589	0.00775016	0.0078452	0.00875778
0.695	0.0987169	0.0619054	0.0191015	-0.00426327	-0.0292753	-0.0514986	-0.0710085	-0.0891047	-0.113828	-0.12188	-0.141214	0.00669896	0.00426862	0.00212386	0.00528021	0.00307034	0.00396424	0.00419565	0.00508722	0.00785873	0.007936	0.00880867
0.696	0.0987946	0.0616573	0.0190047	-0.00487229	-0.0300675	-0.0513438	-0.0710324	-0.0888347	-0.113703	-0.122685	-0.141754	0.00692645	0.0044577	0.00217367	0.0052911	0.00306307	0.00391304	0.00414227	0.00510619	0.00794049	0.00801461	0.00883048
0.697	0.0988076	0.0613734	0.0189456	-0.00548954	-0.0308235	-0.0512179	-0.0711201	-0.0885405	-0.113507	-0.123388	-0.142182	0.00712153	0.00465631	0.00226555	0.00529977	0.00306045	0.00384171	0.00409302	0.0051027	0.00798697	0.00807446	0.00881709
0.698	0.0987285	0.061077	0.0189219	-0.00608906	-0.0315238	-0.0511195	-0.0712743	-0.088204	-0.113234	-0.123943	-0.142465	0.00727878	0.00485516	0.00240993	0.00530217	0.00305359	0.00374685	0.00405687	0.00507968	0.00799282	0.00811096	0.00876321
0.699	0.0985118	0.0607748	0.0189262	-0.0066459	-0.0321435	-0.0510287	-0.0714727	-0.08778	-0.112847	-0.124282	-0.142542	0.00739655	0.00504373	0.00261098	0.00529491	0.0030375	0.00363279	0.00404331	0.00503866	0.00795034	0.00811619	0.00866399
0.7	0.098198	0.0605189	0.0189761	-0.00713088	-0.0326783	-0.0509622	-0.0717441	-0.0873019	-0.112401	-0.12445	-0.14247	0.00748028	0.0052175	0.00286643	0.00527698	0.00301495	0.00351281	0.00405943	0.00499174	0.00786664	0.00809606	0.00852463
0.701	0.0978001	0.0603342	0.0190805	-0.00752119	-0.0331189	-0.0509161	-0.0720862	-0.0867719	-0.111914	-0.124458	-0.142265	0.00753367	0.00537236	0.00316397	0.00524831	0.0029927	0.00340636	0.00411116	0.00494758	0.00774854	0.00805514	0.00834918
0.702	0.0973363	0.0602377	0.0192484	-0.00779925	-0.0334581	-0.0508825	-0.0724884	-0.086192	-0.111403	-0.124326	-0.141946	0.00756133	0.00550775	0.00348592	0.0052103	0.00297898	0.0033368	0.00420037	0.00491195	0.00760454	0.00799913	0.00814349
0.703	0.0968309	0.0602389	0.0194888	-0.00795383	-0.0336922	-0.0508524	-0.0729349	-0.0855674	-0.110883	-0.124084	-0.14154	0.00756771	0.00562684	0.00381239	0.00516508	0.00298134	0.00332484	0.00432398	0.00488667	0.00744458	0.00793479	0.00791466
0.704	0.0963071	0.0603356	0.0198069	-0.00798066	-0.0338195	-0.0508138	-0.0733997	-0.0849016	-0.110366	-0.123759	-0.141071	0.0075567	0.00573555	0.0041244	0.00511449	0.00300521	0.00338327	0.00447282	0.00487226	0.0072806	0.00787259	0.00767262
0.705	0.0958006	0.0605244	0.0202095	-0.00788296	-0.0338449	-0.0507618	-0.0738649	-0.0842118	-0.109874	-0.123402	-0.140581	0.00753152	0.00584105	0.00440417	0.00505867	0.00305398	0.00350661	0.00463744	0.00486023	0.00711971	0.00781515	0.007422
0.706	0.0953409	0.0607918	0.020698	-0.00767085	-0.0337751	-0.0506909	-0.0743064	-0.0835133	-0.109423	-0.123057	-0.140105	0.00749567	0.00594982	0.00463841	0.00499524	0.00313066	0.00367828	0.00480513	0.00484446	0.00696889	0.00776647	0.00716841
0.707	0.0949523	0.0611175	0.0212692	-0.00736048	-0.0336197	-0.0505981	-0.0746992	-0.0828224	-0.109025	-0.122763	-0.139673	0.00745327	0.00606539	0.00481879	0.00491893	0.00323959	0.00387593	0.00496319	0.00482167	0.006833	0.00772908	0.00691657
0.708	0.0946521	0.0614764	0.0219148	-0.00697259	-0.0333902	-0.0504833	-0.0750201	-0.0821563	-0.108688	-0.122554	-0.139312	0.00740955	0.00618699	0.00494251	0.00482219	0.00338689	0.00407821	0.00510051	0.00479354	0.00671458	0.00770398	0.0066704
0.709	0.0944102	0.0618163	0.022611	-0.00653279	-0.03309	-0.0503278	-0.0752199	-0.0814944	-0.108373	-0.122407	-0.138988	0.00736723	0.00630787	0.00501212	0.00469622	0.00357968	0.00426648	0.00520937	0.00476368	0.00661378	0.00768665	0.00642962
0.71	0.0942488	0.0621244	0.0233458	-0.00606467	-0.0327394	-0.0501489	-0.0752994	-0.0808716	-0.108105	-0.12236	-0.13874	0.00733661	0.00642103	0.00503633	0.0045335	0.00382008	0.00443425	0.00528239	0.00474947	0.00652558	0.00767761	0.00619962
0.711	0.0941756	0.0623864	0.0241027	-0.0055901	-0.0323584	-0.0499675	-0.0752649	-0.0803226	-0.107905	-0.122446	-0.138599	0.00732329	0.00651807	0.00502695	0.00432888	0.00410611	0.00458085	0.0053179	0.00476555	0.00645171	0.00767939	0.00598838
0.712	0.0941725	0.0625816	0.0248579	-0.00512935	-0.0319623	-0.0497956	-0.0751155	-0.0798603	-0.107771	-0.122658	-0.138564	0.00733053	0.00659101	0.00499873	0.00408184	0.00442692	0.00471	0.00531632	0.00482362	0.00638822	0.00769164	0.00580217
0.713	0.0942132	0.0626948	0.0255863	-0.00469819	-0.0315656	-0.0496457	-0.074857	-0.0794938	-0.107699	-0.12298	-0.138623	0.00735774	0.00663524	0.00496656	0.00379747	0.00476407	0.00482776	0.00528056	0.00492769	0.00632976	0.00771396	0.00564771
0.714	0.09426	0.0627135	0.0262614	-0.00430641	-0.0311792	-0.0495274	-0.0744961	-0.0792233	-0.107673	-0.123377	-0.138749	0.00739964	0.00664956	0.00494286	0.00348736	0.0050935	0.00494139	0.00521515	0.00507207	0.00627231	0.00774999	0.00553593
0.715	0.0942841	0.0626388	0.0268621	-0.00395814	-0.0308155	-0.0494537	-0.0740559	-0.0790544	-0.107693	-0.123824	-0.138928	0.00744757	0.00664053	0.00493576	0.00316882	0.00539012	0.0050511	0.00512683	0.00524049	0.0062066	0.00779406	0.0054681
0.716	0.0942522	0.0624761	0.0273696	-0.00365093	-0.0304828	-0.0494338	-0.0735598	-0.0789847	-0.107752	-0.124284	-0.139136	0.00749	0.00661778	0.00494781	0.00286447	0.00562987	0.00515386	0.00502269	0.00541195	0.00612538	0.00784263	0.00544633
0.717	0.0941336	0.0622365	0.0277695	-0.00337654	-0.0301863	-0.049473	-0.0730334	-0.0790072	-0.107842	-0.124719	-0.139345	0.00751483	0.00659294	0.00497633	0.00259945	0.00579273	0.00524252	0.00491013	0.00556476	0.00602334	0.00789156	0.00547077
0.718	0.0939038	0.0619359	0.0280533	-0.00312209	-0.0299284	-0.0495733	-0.0725036	-0.0791116	-0.10796	-0.125093	-0.139528	0.00751148	0.0065772	0.00501491	0.00239646	0.00586499	0.00530719	0.0047965	0.00568077	0.00589816	0.00793579	0.00553931
0.719	0.0935295	0.0615829	0.0282145	-0.00287198	-0.0297038	-0.0497232	-0.0719844	-0.0792701	-0.10808	-0.125352	-0.139638	0.00747046	0.00657781	0.00505461	0.00226843	0.00584175	0.0053356	0.00468972	0.00574778	0.00575265	0.00796778	0.00564644
0.72	0.0929822	0.0611844	0.0282503	-0.00261024	-0.029503	-0.0499013	-0.0714811	-0.0794437	-0.108172	-0.12544	-0.139619	0.00738758	0.00659645	0.00508828	0.00221458	0.00572457	0.00532071	0.00459342	0.00576052	0.00558431	0.00797687	0.00578123
0.721	0.0923092	0.0607902	0.0281834	-0.00231812	-0.0293328	-0.0501252	-0.0710481	-0.07966	-0.10829	-0.125397	-0.13952	0.00726728	0.00663244	0.00510889	0.0022208	0.00552502	0.00525976	0.00451469	0.00572548	0.00541188	0.00796519	0.00594462
0.722	0.0915279	0.0604223	0.0280304	-0.0019816	-0.0291874	-0.0503852	-0.0707033	-0.0799074	-0.108442	-0.12522	-0.139339	0.00711539	0.00667868	0.00511115	0.00226847	0.00526236	0.0051539	0.00445795	0.00565393	0.00524935	0.0079289	0.00612929
0.723	0.0906648	0.0600993	0.0278116	-0.00159103	-0.0290598	-0.0506697	-0.0704588	-0.0801752	-0.108635	-0.124919	-0.139079	0.00694098	0.00672549	0.00509101	0.00234305	0.0049624	0.00500971	0.00442616	0.00556188	0.00511101	0.00786515	0.00632673
0.724	0.0897466	0.0598328	0.0275484	-0.00114237	-0.0289404	-0.0509635	-0.0703162	-0.0804496	-0.10887	-0.124502	-0.138739	0.00675492	0.00676273	0.00504528	0.00243809	0.00465472	0.00483975	0.00442132	0.00546662	0.00501102	0.00777661	0.0065317
0.725	0.0888176	0.0596346	0.0272653	-0.000638225	-0.0288246	-0.051257	-0.070279	-0.0807292	-0.10916	-0.124	-0.138342	0.00656919	0.00678308	0.00497123	0.00255385	0.00436998	0.00465798	0.00444219	0.00538386	0.00495208	0.007659	0.00673056
0.726	0.0879187	0.0595095	0.0269847	-8.77539e-05	-0.0287072	-0.0515396	-0.070342	-0.0810116	-0.109513	-0.123447	-0.137907	0.00639536	0.00678228	0.00486692	0.00269315	0.00413401	0.0044804	0.00448621	0.00532408	0.00493174	0.00751253	0.00691321
0.727	0.0870883	0.0594561	0.0267259	0.000493621	-0.0285844	-0.0518022	-0.0704941	-0.0812967	-0.109932	-0.122876	-0.137456	0.00624386	0.00675977	0.0047318	0.0028565	0.00396281	0.00432187	0.00454963	0.00529093	0.00494164	0.00733971	0.00707178
0.728	0.0863601	0.0594686	0.0265041	0.00108517	-0.0284542	-0.0520378	-0.0707205	-0.0815869	-0.110416	-0.122323	-0.137011	0.00612344	0.00671828	0.00456786	0.0030391	0.00385929	0.00419352	0.00462801	0.0052816	0.00496994	0.00714475	0.00720099
0.729	0.085758	0.0595355	0.0263288	0.00166239	-0.0283157	-0.0522404	-0.0710014	-0.0818843	-0.110958	-0.121816	-0.13659	0.00604041	0.00666256	0.00438069	0.00323057	0.00381423	0.00410084	0.00471676	0.00528872	0.00500474	0.00693318	0.00729877
0.73	0.0852578	0.0596178	0.0261928	0.00219792	-0.028157	-0.0523837	-0.0712841	-0.0821537	-0.111498	-0.121328	-0.136147	0.00599479	0.00659695	0.00417997	0.00341705	0.00381075	0.00404205	0.00480938	0.00530273	0.00503221	0.00670536	0.0073611
0.731	0.0849046	0.0597258	0.0261039	0.00266541	-0.027995	-0.0524887	-0.0715795	-0.0824389	-0.112068	-0.12093	-0.135756	0.00599201	0.006529	0.00398262	0.00358482	0.00382912	0.00401806	0.00490422	0.00531996	0.00505277	0.00647548	0.00739625
0.732	0.0847069	0.0598536	0.0260583	0.00304151	-0.0278383	-0.0525641	-0.07188	-0.0827595	-0.112668	-0.120655	-0.135451	0.00602995	0.00646278	0.00380791	0.00372215	0.00385446	0.00402374	0.00499983	0.00533561	0.00507008	0.00625423	0.00741469
0.733	0.0846534	0.0599894	0.0260447	0.00330617	-0.0276938	-0.0526134	-0.0721723	-0.0831249	-0.113283	-0.120513	-0.135243	0.0061021	0.00640094	0.00367573	0.00382214	0.00387554	0.00405434	0.00509475	0.00534911	0.00509023	0.00604995	0.00742578
0.734	0.0847181	0.0601209	0.026047	0.00344503	-0.027566	-0.052637	-0.0724413	-0.0835371	-0.113889	-0.120497	-0.135129	0.00619793	0.00634449	0.00360077	0.00388341	0.00388555	0.00410639	0.00518888	0.00536136	0.00512457	0.00587492	0.00744277
0.735	0.0848797	0.0602429	0.0260495	0.00345111	-0.0274628	-0.0526398	-0.0726834	-0.0840051	-0.114474	-0.12061	-0.135118	0.00630383	0.00629599	0.00358736	0.0039101	0.00387911	0.00417529	0.00528072	0.00537603	0.00517716	0.00572877	0.00746925
0.736	0.0851086	0.0603513	0.026035	0.00332521	-0.0273897	-0.0526236	-0.0728959	-0.0845314	-0.115022	-0.12084	-0.135208	0.00640448	0.0062583	0.00362635	0.00391039	0.00385232	0.00425626	0.00536913	0.00539621	0.0052502	0.00561154	0.00750804
0.737	0.0853727	0.0604439	0.0259876	0.00307602	-0.0273499	-0.0525879	-0.0730784	-0.0851136	-0.115519	-0.121169	-0.135392	0.00648493	0.00623507	0.00369743	0.00389424	0.00380231	0.00434279	0.00545278	0.00542417	0.00534184	0.00552219	0.00755928
0.738	0.0856412	0.060521	0.0258937	0.00271957	-0.0273444	-0.0525298	-0.0732331	-0.0857455	-0.115954	-0.121577	-0.135659	0.00653257	0.0062304	0.00377491	0.00387077	0.00372782	0.00442589	0.00552985	0.00546175	0.00544606	0.0054585	0.00762019
0.739	0.085887	0.0605845	0.0257438	0.00227817	-0.0273721	-0.0524442	-0.0733643	-0.0864167	-0.11632	-0.12204	-0.135994	0.00653874	0.00624757	0.00383391	0.0038457	0.00363057	0.00449428	0.00559808	0.00551097	0.00555434	0.00541822	0.0076862
0.74	0.0860605	0.0606195	0.025525	0.00177898	-0.0274194	-0.0523088	-0.0734561	-0.0870868	-0.116582	-0.122498	-0.136339	0.00649618	0.00628636	0.00385393	0.00381982	0.00351705	0.00453378	0.00565218	0.00557437	0.00565314	0.00539484	0.00774889
0.741	0.0861471	0.0606285	0.0252365	0.00125042	-0.027482	-0.0521166	-0.0735124	-0.0877371	-0.116739	-0.122927	-0.136675	0.00640838	0.00634402	0.00382367	0.00378993	0.00339781	0.00453508	0.00569121	0.0056565	0.00573627	0.00538756	0.0078021
0.742	0.086177	0.0606347	0.0248947	0.000723594	-0.0275623	-0.0518748	-0.0735645	-0.0883828	-0.116838	-0.123355	-0.137038	0.00628448	0.00641327	0.00373936	0.00375063	0.00329019	0.00448617	0.00571395	0.00576016	0.00580435	0.00540262	0.0078489
0.743	0.0861566	0.0606407	0.0245112	0.000226994	-0.0276523	-0.051576	-0.0736186	-0.0890078	-0.116892	-0.12377	-0.137418	0.00613551	0.00648205	0.00360564	0.00369681	0.00321341	0.00437921	0.00571849	0.0058878	0.00585686	0.00544035	0.00788858
0.744	0.0860936	0.0606447	0.0240998	-0.000214445	-0.0277415	-0.0512105	-0.0736749	-0.0895908	-0.116909	-0.124159	-0.137798	0.00597428	0.00653564	0.00343461	0.00362649	0.00318468	0.00420971	0.00570469	0.00603849	0.00589959	0.00550455	0.00792537
0.745	0.0860135	0.0606469	0.02368	-0.000581196	-0.0278223	-0.0507766	-0.0737385	-0.0901214	-0.116908	-0.124528	-0.138177	0.00581369	0.00655808	0.0032443	0.00354256	0.0032116	0.00398	0.00567158	0.00620675	0.0059331	0.00558643	0.00795752
0.746	0.0859425	0.0606445	0.0232719	-0.000860318	-0.027887	-0.050274	-0.0738103	-0.0905893	-0.116907	-0.124879	-0.138548	0.0056646	0.00653474	0.00305627	0.0034533	0.00328954	0.0036983	0.00562028	0.00638154	0.0059609	0.00567749	0.00798556
0.747	0.0859068	0.0606322	0.0228951	-0.00104609	-0.0279294	-0.0497049	-0.0738878	-0.0909861	-0.116918	-0.125217	-0.138909	0.00553427	0.00645455	0.00289237	0.00337116	0.00340274	0.00337983	0.00555402	0.00654757	0.00598738	0.00576847	0.00801089
0.748	0.0859318	0.0606035	0.0225676	-0.00114013	-0.0279451	-0.0490759	-0.0739664	-0.0913076	-0.116949	-0.125548	-0.139257	0.00542606	0.00631175	0.0027703	0.00330991	0.0035294	0.00304831	0.00547817	0.00668725	0.00601661	0.00584942	0.00803489
0.749	0.0860397	0.0605515	0.0223041	-0.00115089	-0.0279321	-0.0483972	-0.0740403	-0.0915539	-0.117005	-0.125877	-0.139589	0.00534019	0.00610709	0.00269959	0.00328071	0.00364766	0.00273752	0.00540009	0.0067832	0.00605244	0.0059112	0.00805915
0.75	0.0862383	0.0604643	0.0221129	-0.00109199	-0.0278875	-0.047678	-0.0740959	-0.0917211	-0.117077	-0.126196	-0.139892	0.00527387	0.00584778	0.00267947	0.00328814	0.00373915	0.00248986	0.00532748	0.00681909	0.00609751	0.00594447	0.00808465
0.751	0.0865012	0.0603142	0.0219886	-0.000982777	-0.0278032	-0.0469174	-0.0740975	-0.0917802	-0.117116	-0.126459	-0.140108	0.00522587	0.00554831	0.00270189	0.00332855	0.00379242	0.00235291	0.00526848	0.0067851	0.00615281	0.00594108	0.00810861
0.752	0.0868736	0.0601253	0.0219453	-0.000845034	-0.0276978	-0.0461584	-0.074072	-0.0917877	-0.117163	-0.126722	-0.140307	0.0051994	0.00523168	0.00275668	0.00339263	0.0038051	0.00235667	0.00523455	0.0066776	0.00622818	0.00590896	0.00814017
0.753	0.0873559	0.0599012	0.0219803	-0.000700696	-0.0275788	-0.0454259	-0.0740191	-0.091766	-0.117214	-0.12699	-0.140498	0.00519622	0.00492363	0.00283491	0.00346699	0.00377922	0.00249484	0.00523117	0.00649723	0.00632868	0.00585293	0.00818335
0.754	0.0879305	0.0596434	0.0220831	-0.000570893	-0.027452	-0.0447395	-0.0739319	-0.091729	-0.11725	-0.127251	-0.140682	0.00521819	0.00465141	0.00293224	0.00353845	0.00372181	0.00273025	0.00525996	0.00625174	0.00645985	0.00578445	0.00824399
0.755	0.0885821	0.059361	0.0222426	-0.000473962	-0.0273251	-0.0441231	-0.0738131	-0.0916996	-0.117259	-0.127502	-0.140868	0.005268	0.00443707	0.00304891	0.00359676	0.00364144	0.00301645	0.00531607	0.00595307	0.00662066	0.00571064	0.00832006
0.756	0.0892877	0.0590649	0.022444	-0.000424183	-0.0272045	-0.0435965	-0.0736651	-0.0916976	-0.117229	-0.127732	-0.141063	0.00534572	0.00429304	0.00318771	0.00363568	0.00354735	0.00331394	0.00539028	0.00561757	0.00680761	0.00564133	0.00840819
0.757	0.0900187	0.0587673	0.0226709	-0.000430693	-0.0270945	-0.0431754	-0.0734901	-0.0917389	-0.117147	-0.127927	-0.141272	0.00544833	0.00421851	0.00335121	0.00365296	0.00344775	0.00359519	0.00547022	0.00526454	0.0070144	0.00558711	0.00850325
0.758	0.090745	0.0584819	0.0229064	-0.000496923	-0.0269977	-0.0428707	-0.0732919	-0.091836	-0.117001	-0.128072	-0.141501	0.00557037	0.00420004	0.00353935	0.00364931	0.00334903	0.00384359	0.00554224	0.00491443	0.00723218	0.00555704	0.00859789
0.759	0.0914372	0.058223	0.0231353	-0.000620529	-0.026914	-0.0426879	-0.073075	-0.0919966	-0.116788	-0.12815	-0.14175	0.00570521	0.00421684	0.00374817	0.0036272	0.00325599	0.00405147	0.00559349	0.004587	0.00745112	0.0055579	0.00868365
0.76	0.0920682	0.0580042	0.0233446	-0.000793785	-0.0268415	-0.0426269	-0.072844	-0.0922237	-0.116506	-0.128149	-0.142024	0.00584652	0.00424738	0.00396998	0.00358962	0.00317276	0.00421836	0.00561359	0.00429928	0.00766209	0.00559389	0.00875234
0.761	0.0925745	0.0578143	0.0235118	-0.00100395	-0.0267632	-0.0426604	-0.0725738	-0.0924767	-0.116113	-0.128002	-0.142264	0.00598529	0.00427309	0.00419244	0.00353944	0.00310247	0.00434827	0.00559309	0.00406157	0.00785474	0.00565947	0.0087895
0.762	0.092963	0.0576755	0.0236396	-0.00123656	-0.0266814	-0.0427893	-0.0722849	-0.0927682	-0.115644	-0.127731	-0.1425	0.00612389	0.00428314	0.0044064	0.00347921	0.00305125	0.0044523	0.00553213	0.00387992	0.00802481	0.00576131	0.0087977
0.763	0.0932469	0.0576064	0.023734	-0.00147362	-0.0265962	-0.0430108	-0.0719992	-0.0931103	-0.115141	-0.127364	-0.142764	0.00626129	0.00427471	0.00460038	0.00341188	0.00302286	0.00454229	0.00543393	0.00375444	0.00817579	0.00589868	0.00877911
0.764	0.0934209	0.0576071	0.0237968	-0.00169632	-0.0265009	-0.0433051	-0.0717174	-0.0934853	-0.114618	-0.126898	-0.143048	0.00639794	0.00424954	0.00476462	0.0033416	0.00301861	0.00463101	0.00530607	0.00367938	0.00831288	0.00607019	0.00874115
0.765	0.0934957	0.0576791	0.0238372	-0.00188652	-0.0263914	-0.0436546	-0.0714476	-0.0938815	-0.114102	-0.126347	-0.143354	0.00653525	0.00420897	0.00489083	0.00327457	0.00303468	0.00472909	0.0051587	0.00364198	0.00843863	0.00626801	0.00868791
0.766	0.0934859	0.0578188	0.0238663	-0.00202825	-0.0262652	-0.0440399	-0.071195	-0.0942845	-0.113617	-0.125726	-0.143676	0.00667392	0.00415373	0.00497272	0.00321931	0.00306218	0.00484375	0.00500476	0.00362777	0.00855683	0.00648331	0.00862668
0.767	0.0934085	0.0580175	0.0238963	-0.0021087	-0.0261216	-0.044441	-0.070963	-0.0946776	-0.113182	-0.125053	-0.144006	0.00681359	0.00408242	0.00500613	0.00318602	0.00308847	0.00497778	0.00485855	0.00362335	0.00867122	0.00670643	0.00856687
0.768	0.093283	0.0582634	0.02394	-0.00211898	-0.0259627	-0.0448394	-0.0707542	-0.0950456	-0.112814	-0.124347	-0.144331	0.00695313	0.00399099	0.00498902	0.0031847	0.0031	0.00512961	0.00473387	0.00361795	0.00878388	0.00692666	0.0085175
0.769	0.0931302	0.0585424	0.0240092	-0.00205459	-0.0257938	-0.0452194	-0.0705709	-0.0953753	-0.112524	-0.123627	-0.144638	0.0070912	0.0038739	0.00492143	0.00322266	0.0030857	0.0052942	0.00464223	0.00360489	0.00889491	0.00713315	0.00848596
0.77	0.0929695	0.0588389	0.0241143	-0.00191543	-0.0256232	-0.0455687	-0.0704154	-0.0956564	-0.112315	-0.122914	-0.14491	0.00722695	0.00372642	0.00480545	0.00330209	0.00304016	0.00546458	0.00459124	0.00358232	0.00900288	0.00731595	0.00847717
0.771	0.0928012	0.0591274	0.0242567	-0.00170519	-0.0254578	-0.0458713	-0.0702782	-0.0958684	-0.112167	-0.122208	-0.145107	0.00735806	0.00354583	0.00464345	0.00341876	0.0029647	0.00563255	0.00458189	0.00355326	0.00910407	0.0074634	0.00849013
0.772	0.0926143	0.0593781	0.0244325	-0.00143263	-0.0253026	-0.0461065	-0.0701404	-0.0959805	-0.112037	-0.121486	-0.145169	0.00748713	0.00333579	0.00444322	0.00356344	0.00287234	0.00579032	0.00461279	0.00352034	0.00919245	0.00757101	0.00852067
0.773	0.0924634	0.0596055	0.0246568	-0.00110793	-0.0251839	-0.0463024	-0.070041	-0.0960402	-0.111964	-0.120825	-0.145151	0.00761673	0.00310915	0.00421426	0.00372369	0.00278393	0.00593273	0.00467969	0.0034994	0.00927253	0.00764097	0.00857227
0.774	0.0923515	0.0597987	0.0249252	-0.000743659	-0.0251146	-0.0464631	-0.0699811	-0.096051	-0.111927	-0.120232	-0.145035	0.00774789	0.00288396	0.00396845	0.00388486	0.00272588	0.00605475	0.00477404	0.00350302	0.00934647	0.00767716	0.00864362
0.775	0.0922843	0.0599549	0.0252326	-0.000352584	-0.0251084	-0.0466002	-0.0699685	-0.0960264	-0.111908	-0.119719	-0.144818	0.00788063	0.00268154	0.00371942	0.00403289	0.00272198	0.00615112	0.00488533	0.00353687	0.00941391	0.00768391	0.00872624
0.776	0.0922627	0.0600746	0.0255702	5.23845e-05	-0.0251757	-0.0467271	-0.0700095	-0.0959807	-0.111887	-0.119295	-0.144501	0.00801255	0.00252261	0.00348339	0.00415513	0.00278451	0.00621693	0.00500271	0.00360106	0.00947497	0.00766882	0.00881171
0.777	0.0922819	0.0601612	0.0259268	0.000459068	-0.0253225	-0.0468573	-0.0701078	-0.095927	-0.111842	-0.118959	-0.144083	0.00813875	0.00241991	0.00327883	0.00424118	0.00290879	0.00624756	0.00511582	0.00368976	0.00952962	0.00764187	0.00889264
0.778	0.0923347	0.0602212	0.0262898	0.00085682	-0.0255499	-0.0470046	-0.0702651	-0.0958782	-0.111753	-0.118709	-0.143572	0.00825249	0.00237215	0.00312477	0.00428342	0.0030757	0.00623865	0.00521519	0.00379199	0.00957623	0.00761352	0.00896179
0.779	0.0924127	0.0602641	0.0266466	0.00123699	-0.0258537	-0.0471813	-0.0704811	-0.0958452	-0.111607	-0.118538	-0.142977	0.00834647	0.00236464	0.00303781	0.00427744	0.00325999	0.0061865	0.00529267	0.00389478	0.00961118	0.00759333	0.00901246
0.78	0.0925072	0.0603013	0.0269856	0.00159313	-0.0262239	-0.0473981	-0.0707531	-0.0958368	-0.111393	-0.118437	-0.142313	0.00841426	0.00237691	0.00302802	0.00422252	0.00343836	0.00608857	0.00534168	0.00398655	0.009629	0.00758879	0.00903894
0.781	0.0926067	0.0603431	0.0272959	0.00192109	-0.0266447	-0.0476607	-0.0710733	-0.0958558	-0.111106	-0.118393	-0.141596	0.00845108	0.00239258	0.00309542	0.00412192	0.0035942	0.00594409	0.00535705	0.00406012	0.00962297	0.00760419	0.00903666
0.782	0.0926601	0.0603742	0.0275553	0.00221963	-0.0270851	-0.0479491	-0.0714012	-0.0958629	-0.110701	-0.11834	-0.140784	0.00845199	0.00240587	0.00322856	0.00398301	0.00371821	0.00575338	0.00533349	0.00411179	0.00958157	0.00763617	0.00899634
0.783	0.0927029	0.0604299	0.0277728	0.00248756	-0.0275304	-0.0482826	-0.0717526	-0.095891	-0.110232	-0.118313	-0.139953	0.00842457	0.00242722	0.00341269	0.0038174	0.00381003	0.00552159	0.00527316	0.00414531	0.00950155	0.00768763	0.00892246
0.784	0.092741	0.060524	0.0279507	0.00272515	-0.0279576	-0.0486625	-0.0721203	-0.0959451	-0.10973	-0.118318	-0.139143	0.00837424	0.00247778	0.00362781	0.00364009	0.00387529	0.00525608	0.0051761	0.00417388	0.00938384	0.00775749	0.00882308
0.785	0.0927789	0.0606652	0.0280931	0.00293447	-0.0283424	-0.0490838	-0.0724934	-0.0960222	-0.109222	-0.118353	-0.138381	0.00830782	0.00258294	0.00385416	0.00346818	0.00392103	0.00496586	0.00504365	0.00420931	0.00922554	0.00784012	0.00870057
0.786	0.0928216	0.0608581	0.0282062	0.00311792	-0.0286616	-0.049538	-0.0728597	-0.0961162	-0.108741	-0.118419	-0.137696	0.00823208	0.00276043	0.00407416	0.00331835	0.0039534	0.00466207	0.00487783	0.00426315	0.00902645	0.00792916	0.00855931
0.787	0.092872	0.0611021	0.0282979	0.00327774	-0.0288948	-0.0500123	-0.0732046	-0.0962179	-0.108315	-0.118517	-0.137105	0.00815263	0.00301126	0.00427307	0.00320366	0.00397502	0.0043572	0.00468096	0.0043437	0.00878994	0.00801857	0.00840623
0.788	0.0929325	0.0613923	0.0283768	0.00341595	-0.0290258	-0.0504924	-0.0735145	-0.0963171	-0.107971	-0.118649	-0.136621	0.00807262	0.00331935	0.00443935	0.00313063	0.0039838	0.00406453	0.00445549	0.00445318	0.00852145	0.00810253	0.00824874
0.789	0.0930039	0.0617197	0.0284516	0.00353415	-0.0290446	-0.0509632	-0.0737772	-0.096404	-0.107732	-0.118819	-0.136253	0.00799236	0.00365858	0.00456489	0.00309805	0.00397366	0.00379767	0.00420419	0.00458726	0.00822805	0.00817579	0.00809391
0.79	0.0930848	0.0620716	0.0285299	0.00363351	-0.0289479	-0.0514099	-0.0739833	-0.0964699	-0.107615	-0.11903	-0.135998	0.00790978	0.00400107	0.00464513	0.00309834	0.00393706	0.00357013	0.00393068	0.00473666	0.00791795	0.00823382	0.00794784
0.791	0.093171	0.0624328	0.0286174	0.0037148	-0.0287395	-0.0518191	-0.0741266	-0.0965078	-0.107627	-0.119286	-0.135851	0.00782156	0.00432298	0.00467912	0.00312104	0.00386832	0.0033948	0.00364032	0.00488982	0.00760007	0.00827307	0.00781494
0.792	0.0932263	0.0627671	0.0287091	0.00377949	-0.0284236	-0.0521645	-0.0741845	-0.0964868	-0.107739	-0.119558	-0.135757	0.00772064	0.00460444	0.00466847	0.00315594	0.00376609	0.0032824	0.00333876	0.00503573	0.00728136	0.00828902	0.00769573
0.793	0.0932392	0.0630558	0.0288041	0.0038283	-0.0280151	-0.0524361	-0.0741554	-0.0964003	-0.107937	-0.119841	-0.135693	0.00760654	0.00483992	0.0046191	0.00319684	0.00363793	0.0032397	0.00304065	0.00516117	0.00696923	0.00827853	0.00758531
0.794	0.0932283	0.0633017	0.028908	0.00385957	-0.0275451	-0.0526467	-0.0740675	-0.096279	-0.108242	-0.120176	-0.135683	0.00748244	0.00503001	0.00453926	0.00324244	0.00350005	0.003268	0.00276216	0.00526649	0.00668001	0.00824765	0.00749114
0.795	0.0931856	0.0634925	0.0290161	0.00387457	-0.0270416	-0.0527992	-0.0739349	-0.0961298	-0.108638	-0.120567	-0.135709	0.00734927	0.00518173	0.00443826	0.0032932	0.00337519	0.00336157	0.00252389	0.00534946	0.00642148	0.00819747	0.00740808
0.796	0.0931024	0.0636178	0.0291215	0.00387505	-0.0265347	-0.0529004	-0.0737743	-0.095961	-0.109102	-0.121018	-0.135755	0.00720912	0.00530705	0.00432565	0.00334972	0.00328928	0.00350763	0.00234747	0.00541062	0.00619999	0.00813013	0.00732981
0.797	0.0929688	0.0636697	0.0292147	0.00386298	-0.0260535	-0.0529595	-0.0736019	-0.0957795	-0.109606	-0.121523	-0.135801	0.00706546	0.00542029	0.00420992	0.00341039	0.00326404	0.00368823	0.00224853	0.00545273	0.00602068	0.00804933	0.00725061
0.798	0.0927769	0.063644	0.0292857	0.00384088	-0.0256255	-0.0529888	-0.0734346	-0.0955923	-0.110121	-0.122075	-0.13583	0.00692179	0.0055349	0.00409788	0.00347011	0.00330871	0.0038833	0.00222954	0.00547924	0.00588556	0.00795919	0.00716518
0.799	0.0925222	0.0635408	0.0293242	0.00381173	-0.0252745	-0.0530029	-0.0732887	-0.0954054	-0.110618	-0.122663	-0.135829	0.00678127	0.00566092	0.00399447	0.00352061	0.00341614	0.00407326	0.00227729	0.00549371	0.00579308	0.00786385	0.00706949
0.8	0.0922045	0.0633647	0.0293211	0.00377874	-0.0250188	-0.0530177	-0.0731786	-0.0952233	-0.111073	-0.123272	-0.135791	0.0066468	0.00580374	0.00390321	0.00355201	0.00356633	0.00424078	0.00236865	0.00549944	0.0057383	0.00776711	0.00696167
0.801	0.0918288	0.0631242	0.0292692	0.00374515	-0.0248703	-0.0530491	-0.0731156	-0.0950483	-0.111467	-0.123886	-0.135714	0.00652137	0.00596443	0.00382715	0.00355534	0.00373447	0.00437209	0.00247965	0.00549974	0.00571372	0.00767211	0.00684261
0.802	0.0913953	0.0628254	0.0291615	0.00371386	-0.0248316	-0.0531075	-0.0731007	-0.094872	-0.111776	-0.124474	-0.135588	0.00640606	0.00613977	0.00376949	0.00352498	0.00389887	0.00445824	0.00259163	0.00549868	0.00571028	0.00758154	0.00671598
0.803	0.090882	0.0624599	0.0289872	0.00368892	-0.024888	-0.0531858	-0.0731087	-0.094656	-0.111953	-0.124968	-0.135368	0.0063031	0.00632663	0.00373394	0.00346045	0.00404375	0.00449326	0.00269446	0.00549602	0.00571343	0.00749264	0.00658285
0.804	0.0903478	0.0620699	0.0287587	0.00366937	-0.0250416	-0.0533158	-0.0731657	-0.0944329	-0.112045	-0.125399	-0.135126	0.00622466	0.00652691	0.00372543	0.00337052	0.00416498	0.00447739	0.00278272	0.00550002	0.00572323	0.00741116	0.00645829
0.805	0.0898248	0.061679	0.028484	0.00365538	-0.0252797	-0.0535103	-0.0732736	-0.094206	-0.112075	-0.125763	-0.134894	0.00617474	0.00673976	0.0037478	0.00327029	0.00426552	0.00441537	0.00285737	0.00551629	0.0057346	0.00733944	0.0063518
0.806	0.0893413	0.0613068	0.0281735	0.00364649	-0.0255832	-0.0537752	-0.073426	-0.0939725	-0.112064	-0.126052	-0.134702	0.00615617	0.0069652	0.0038023	0.00318062	0.00435371	0.00431517	0.00292224	0.00554774	0.00574302	0.00727878	0.0062704
0.807	0.088922	0.0609691	0.0278395	0.00364093	-0.0259281	-0.0541107	-0.0736106	-0.0937269	-0.112034	-0.126256	-0.134573	0.0061713	0.00720282	0.00388601	0.00312452	0.00444042	0.00418774	0.00298037	0.00559533	0.00574732	0.00723114	0.00621888
0.808	0.0885881	0.0606789	0.0274957	0.00363584	-0.0262892	-0.0545123	-0.0738124	-0.0934636	-0.11201	-0.12637	-0.134529	0.00622068	0.00744973	0.00399161	0.00312092	0.00453508	0.00404587	0.0030327	0.00565675	0.00574831	0.00719864	0.00619796
0.809	0.0883558	0.0604447	0.0271564	0.00362748	-0.0266412	-0.0549711	-0.0740145	-0.0931782	-0.112013	-0.126392	-0.134587	0.00630373	0.0076994	0.0041083	0.00317828	0.00464272	0.00390302	0.0030771	0.00572636	0.00574841	0.00718333	0.00620421
0.81	0.0882345	0.0602703	0.026835	0.00361152	-0.0269612	-0.0554743	-0.0742002	-0.0928677	-0.112064	-0.126328	-0.134762	0.00641981	0.0079415	0.00422353	0.00329175	0.00476247	0.00377217	0.00310873	0.00579601	0.00575123	0.00718684	0.00623112
0.811	0.0882256	0.0601543	0.0265436	0.00358338	-0.0272298	-0.0560058	-0.0743532	-0.0925312	-0.112177	-0.126183	-0.13506	0.00656933	0.00816263	0.00432496	0.00344579	0.00488823	0.00366476	0.00312132	0.00585649	0.00576103	0.00721009	0.00627074
0.812	0.0883217	0.0600901	0.0262912	0.00353867	-0.0274325	-0.0565469	-0.0744596	-0.09217	-0.112361	-0.125971	-0.135479	0.00675419	0.00834799	0.00440202	0.00362023	0.00501079	0.00358968	0.00310895	0.00589915	0.00578205	0.00725305	0.00631559
0.813	0.0884664	0.0600421	0.0260738	0.00347469	-0.0275496	-0.057056	-0.0744782	-0.0917513	-0.11257	-0.125653	-0.135952	0.00697088	0.00847948	0.00444568	0.0037954	0.00512075	0.00355355	0.00306841	0.0059148	0.00581178	0.00731131	0.00635771
0.814	0.0886539	0.0600043	0.0258978	0.00338729	-0.0275822	-0.0575219	-0.0744129	-0.0912962	-0.112816	-0.125272	-0.136488	0.00723021	0.00854927	0.00445325	0.00395776	0.00521163	0.00355522	0.00299664	0.00590167	0.00585819	0.0073849	0.0063963
0.815	0.0888801	0.0599748	0.0257671	0.00327414	-0.0275442	-0.0579377	-0.0742818	-0.0908361	-0.113112	-0.124879	-0.137102	0.00753171	0.00854955	0.00442307	0.00409862	0.00527843	0.00359514	0.00289777	0.00586185	0.00592233	0.00747521	0.00643194
0.816	0.0891178	0.0599375	0.0256782	0.00313599	-0.027448	-0.0582877	-0.0740911	-0.0903859	-0.113444	-0.124502	-0.137776	0.00787101	0.00847677	0.00435631	0.00421474	0.00532083	0.00366826	0.0027796	0.00579745	0.00600045	0.00757993	0.00646722
0.817	0.0893353	0.0598739	0.0256234	0.00297501	-0.0273096	-0.0585573	-0.0738484	-0.0899583	-0.113789	-0.124165	-0.138482	0.00823978	0.00833269	0.00425601	0.00430706	0.00534181	0.00376736	0.00265234	0.00571435	0.00608794	0.00769789	0.00650592
0.818	0.0895019	0.0597662	0.0255931	0.00279516	-0.0271486	-0.0587347	-0.0735645	-0.0895655	-0.114118	-0.123887	-0.139192	0.00862547	0.00812377	0.00412629	0.00437916	0.00534655	0.00388418	0.0025282	0.00562014	0.00617899	0.0078283	0.00655205
0.819	0.0895906	0.0595994	0.0255762	0.00260195	-0.0269866	-0.0588119	-0.0732524	-0.0892181	-0.114405	-0.123686	-0.139877	0.0090128	0.00786034	0.00397189	0.0044358	0.005341	0.00401082	0.00241986	0.00552306	0.00626782	0.00797059	0.00660893
0.82	0.0895807	0.0593622	0.0255619	0.00240217	-0.0268458	-0.0587845	-0.0729265	-0.0889244	-0.114622	-0.123573	-0.14051	0.00938594	0.0075555	0.00379813	0.00448197	0.00533066	0.0041411	0.00233889	0.00543107	0.00635002	0.00812407	0.0066786
0.821	0.0894598	0.059048	0.0255403	0.00220341	-0.0267468	-0.058652	-0.0726011	-0.0886898	-0.114745	-0.123555	-0.141067	0.00973057	0.00722377	0.00361127	0.00452251	0.00531993	0.00427168	0.00229446	0.00535111	0.00642356	0.00828749	0.00676158
0.822	0.0892252	0.0586559	0.0255034	0.00201357	-0.0267075	-0.0584176	-0.0722897	-0.0885159	-0.114756	-0.123631	-0.141529	0.0100356	0.00687964	0.00341934	0.00456218	0.00531205	0.00440252	0.00229263	0.00528861	0.00648936	0.00845859	0.00685697
0.823	0.0888686	0.0581817	0.0254414	0.00184066	-0.0267381	-0.0580793	-0.0719923	-0.0883866	-0.114625	-0.123776	-0.141863	0.0102914	0.00653423	0.00323191	0.00460565	0.00530992	0.00453661	0.00233552	0.00524571	0.00654803	0.00863188	0.00696006
0.824	0.0883762	0.0576137	0.0253461	0.00169216	-0.0268346	-0.0576298	-0.0716904	-0.0882662	-0.114311	-0.123934	-0.142013	0.0104973	0.00619958	0.00306314	0.00465814	0.00531653	0.00467672	0.00242248	0.00522293	0.00660585	0.00880162	0.00706922
0.825	0.0878229	0.0569983	0.0252316	0.00157202	-0.0270153	-0.0571067	-0.0714286	-0.0881897	-0.113875	-0.124154	-0.142056	0.0106564	0.00588549	0.0029298	0.00472426	0.00533347	0.00483051	0.00255282	0.00522379	0.00667181	0.00896644	0.00718215
0.826	0.08725	0.0563591	0.0251058	0.00148391	-0.0272782	-0.0565266	-0.071214	-0.0881524	-0.113337	-0.124423	-0.142009	0.0107727	0.00559614	0.00284667	0.00480671	0.00536426	0.00500076	0.00272069	0.0052435	0.0067493	0.00911965	0.00729359
0.827	0.0866995	0.0557197	0.0249783	0.00142929	-0.0276142	-0.0559053	-0.0710479	-0.0881446	-0.112718	-0.124724	-0.141891	0.0108513	0.00533344	0.00282376	0.004905	0.00541149	0.00518693	0.00291793	0.00527603	0.00683973	0.00925551	0.00739794
0.828	0.0862149	0.0551049	0.0248614	0.00140729	-0.0280081	-0.0552585	-0.0709283	-0.0881561	-0.112047	-0.125034	-0.141728	0.0108975	0.00509702	0.00286172	0.00501435	0.00547597	0.00538405	0.00313371	0.00531284	0.00694072	0.00936919	0.00748915
0.829	0.085838	0.0545385	0.0247684	0.00141471	-0.0284403	-0.0546012	-0.0708503	-0.0881772	-0.111351	-0.125335	-0.141546	0.0109153	0.00488513	0.00295081	0.00512551	0.00555556	0.00558323	0.00335532	0.00534356	0.00704655	0.00945738	0.00756136
0.83	0.085605	0.054042	0.0247132	0.00144615	-0.0288873	-0.0539472	-0.0708073	-0.0881992	-0.110661	-0.12561	-0.141372	0.0109076	0.00469537	0.00307391	0.00522571	0.00564467	0.00577331	0.00356934	0.00535719	0.00714942	0.00951869	0.00760972
0.831	0.0855443	0.053633	0.0247087	0.00149425	-0.0293237	-0.0533083	-0.0707913	-0.0882156	-0.110004	-0.125842	-0.141234	0.0108769	0.00452534	0.00321166	0.00530036	0.00573454	0.00594284	0.00376304	0.00534356	0.0072414	0.00955373	0.00763134
0.832	0.0856731	0.0533238	0.0247654	0.00155017	-0.0297234	-0.0526941	-0.0707939	-0.0882227	-0.109404	-0.126023	-0.141155	0.010826	0.00437299	0.003347	0.00533529	0.00581434	0.00608225	0.00392566	0.00529487	0.00731619	0.00956499	0.0076261
0.833	0.0859936	0.0531188	0.0248904	0.00160421	-0.0300607	-0.0521101	-0.0708047	-0.0882167	-0.108874	-0.126142	-0.141151	0.010759	0.00423654	0.00346773	0.00531874	0.00587263	0.00618526	0.00404936	0.00520644	0.00737014	0.0095557	0.00759647
0.834	0.0864537	0.0529889	0.0250767	0.00164626	-0.0302993	-0.0515367	-0.0707805	-0.0881579	-0.10837	-0.126139	-0.141169	0.0106799	0.00411297	0.00356693	0.00524261	0.00589903	0.00624875	0.00412829	0.00507589	0.00739979	0.00952641	0.00754468
0.835	0.0870675	0.05295	0.0253324	0.00166614	-0.0304314	-0.0509966	-0.0707449	-0.0880855	-0.107939	-0.126067	-0.141267	0.0106011	0.00400555	0.00364507	0.00510538	0.00588658	0.0062763	0.00416473	0.00491449	0.00741278	0.0094873	0.00748455
0.836	0.0878197	0.0530019	0.0256565	0.0016556	-0.03045	-0.0505004	-0.0707095	-0.0880239	-0.107597	-0.125958	-0.141472	0.0105324	0.00391457	0.00370609	0.00491088	0.00583072	0.00627409	0.00416344	0.0047315	0.00741524	0.00944139	0.00742408
0.837	0.0886722	0.0531296	0.02604	0.00160737	-0.0303493	-0.0500487	-0.0706764	-0.087986	-0.107334	-0.125828	-0.141779	0.0104825	0.00384145	0.00375644	0.00466878	0.00573116	0.0062502	0.00413242	0.00454183	0.00741377	0.00939136	0.00737076
0.838	0.0895801	0.0533148	0.0264697	0.00151629	-0.0301299	-0.049641	-0.0706495	-0.0879855	-0.107137	-0.125696	-0.142178	0.0104567	0.00378814	0.00380278	0.00439397	0.00559145	0.00621261	0.00408242	0.00436256	0.00741406	0.00933851	0.00732885
0.839	0.0904956	0.053537	0.0269294	0.0013797	-0.0297992	-0.049276	-0.0706346	-0.0880357	-0.106985	-0.125579	-0.142651	0.0104549	0.00375685	0.00384983	0.00410532	0.00541848	0.00616716	0.00402572	0.00421037	0.00741975	0.00928283	0.00729831
0.84	0.0913714	0.0537759	0.0274011	0.00119775	-0.0293706	-0.0489521	-0.0706381	-0.0881484	-0.106858	-0.125495	-0.143175	0.0104706	0.00374969	0.00389892	0.00382382	0.00522175	0.00611606	0.0039749	0.00409845	0.00743221	0.00922353	0.00727479
0.841	0.0921649	0.0540127	0.0278657	0.000973484	-0.0288633	-0.0486679	-0.0706673	-0.0883328	-0.106733	-0.125456	-0.143723	0.0104916	0.00376807	0.00394766	0.00356995	0.00501241	0.00605736	0.00394138	0.00403392	0.00745105	0.00915952	0.00725081
0.842	0.0928403	0.0542316	0.028305	0.000712796	-0.0283009	-0.0484224	-0.0707286	-0.0885948	-0.10659	-0.125473	-0.144265	0.0105023	0.00381201	0.00399083	0.00336052	0.00480222	0.00598553	0.00393415	0.00401675	0.00747535	0.00908996	0.00721775
0.843	0.0933725	0.0544211	0.0287024	0.000424192	-0.0277103	-0.048215	-0.0708275	-0.0889356	-0.106414	-0.125549	-0.144774	0.0104863	0.00387955	0.00402212	0.00320544	0.00460254	0.00589305	0.00395872	0.0040409	0.00750478	0.00901458	0.00716801
0.844	0.0937176	0.0545555	0.0290365	0.000117973	-0.0271114	-0.0480287	-0.0709433	-0.0893229	-0.106155	-0.125643	-0.145177	0.010428	0.00396509	0.00403533	0.0031049	0.00442221	0.00576977	0.0040156	0.00409711	0.00753784	0.00892986	0.00709433
0.845	0.0938728	0.0546313	0.0292968	-0.000194777	-0.026531	-0.047864	-0.071074	-0.0897443	-0.105804	-0.125741	-0.145443	0.0103177	0.00406357	0.00402729	0.00305151	0.00427109	0.00561361	0.0041013	0.00417232	0.00757806	0.008841	0.00699742
0.846	0.0938867	0.0546774	0.0294867	-0.000498867	-0.0260078	-0.0477429	-0.0712497	-0.0902246	-0.105412	-0.125882	-0.145611	0.0101531	0.00416699	0.00399893	0.00303356	0.00415382	0.00542061	0.00421119	0.00426057	0.0076291	0.00874841	0.00688205
0.847	0.0937858	0.0547044	0.0296055	-0.000780199	-0.0255666	-0.0476685	-0.0714689	-0.09075	-0.104991	-0.126053	-0.145671	0.00993642	0.00426654	0.00395398	0.00303714	0.00407328	0.00519172	0.00433563	0.00435552	0.00769217	0.00865269	0.00675493
0.848	0.0936056	0.0547262	0.0296564	-0.001025	-0.0252277	-0.0476435	-0.0717275	-0.0913034	-0.104557	-0.126238	-0.14562	0.0096757	0.00435415	0.00389905	0.00305004	0.00402987	0.00493132	0.00446298	0.00445259	0.00776561	0.00855385	0.00662463
0.849	0.0933875	0.0547584	0.0296464	-0.00122054	-0.0250055	-0.0476698	-0.0720185	-0.0918651	-0.104132	-0.126419	-0.14546	0.00938317	0.0044239	0.00384241	0.00306328	0.00402209	0.00464651	0.00458092	0.00454813	0.00784411	0.00845136	0.0064999
0.85	0.0931757	0.0548166	0.0295853	-0.00135589	-0.0249082	-0.0477481	-0.0723329	-0.0924142	-0.10374	-0.126576	-0.145201	0.0090737	0.00447348	0.00379245	0.00307157	0.00404726	0.00434602	0.00467791	0.00463865	0.00791901	0.00834452	0.00638822
0.851	0.0930132	0.0549153	0.0294855	-0.00142245	-0.0249366	-0.0478774	-0.0726603	-0.0929297	-0.103405	-0.126693	-0.144856	0.00876282	0.00450522	0.00375615	0.00307311	0.00410227	0.00403907	0.00474464	0.00472058	0.00797975	0.00823311	0.0062949
0.852	0.0929382	0.0550654	0.0293601	-0.0014145	-0.025085	-0.0480548	-0.0729892	-0.0933916	-0.103148	-0.126758	-0.144442	0.00846498	0.00452668	0.00373798	0.00306937	0.00418414	0.00373453	0.00477534	0.00479048	0.00801616	0.00811817	0.00622316
0.853	0.092981	0.0552737	0.0292227	-0.00132956	-0.0253409	-0.0482754	-0.0733079	-0.0937823	-0.10299	-0.12676	-0.143982	0.0081923	0.00455024	0.00373955	0.0030647	0.00429034	0.00344058	0.00476884	0.00484582	0.00802085	0.00800258	0.00617488
0.854	0.0931484	0.0555332	0.0290831	-0.00116873	-0.0256825	-0.0485258	-0.0735951	-0.0940751	-0.102928	-0.126679	-0.143479	0.00795355	0.00459063	0.00375974	0.00306579	0.00441802	0.00316326	0.0047289	0.00488614	0.00799128	0.00789065	0.00615207
0.855	0.0934152	0.0558169	0.0289442	-0.000938376	-0.0260773	-0.0487795	-0.0738122	-0.0942259	-0.102929	-0.12647	-0.142901	0.00775351	0.00466271	0.00379621	0.00307992	0.004564	0.00291253	0.00466313	0.00490978	0.00792811	0.00778666	0.00615251
0.856	0.0938195	0.0561439	0.0288251	-0.000644802	-0.0265117	-0.049049	-0.0739871	-0.0942722	-0.103047	-0.1262	-0.142336	0.00759801	0.00477962	0.00384646	0.00311602	0.00472601	0.00269846	0.00458635	0.00492257	0.00784327	0.00770174	0.00618274
0.857	0.0943523	0.0565047	0.0287347	-0.000297703	-0.0269599	-0.0493275	-0.0741213	-0.0942217	-0.103286	-0.125894	-0.141817	0.00748923	0.00494532	0.00390762	0.00317978	0.00489916	0.0025302	0.00451382	0.00493172	0.00775217	0.00764393	0.00624647
0.858	0.0949877	0.0568819	0.0286779	9.04737e-05	-0.0273943	-0.049605	-0.0742135	-0.0940807	-0.103638	-0.125571	-0.14136	0.00742722	0.00515506	0.00397695	0.00327207	0.00507673	0.00241707	0.00445941	0.00494448	0.00767231	0.00761953	0.00634526
0.859	0.0956911	0.0572552	0.0286568	0.000505514	-0.0277887	-0.0498717	-0.0742645	-0.0938593	-0.104087	-0.125253	-0.140979	0.00740977	0.00539621	0.00405173	0.00338815	0.0052502	0.00236434	0.00443253	0.00496739	0.00762054	0.00763203	0.00647801
0.86	0.0964213	0.0576036	0.0286718	0.000932081	-0.0281201	-0.0501185	-0.0742773	-0.0935713	-0.104611	-0.124961	-0.140679	0.00743177	0.00565132	0.00412893	0.00351833	0.00540975	0.00236984	0.00443585	0.0050046	0.0076096	0.00768142	0.00664041
0.861	0.0971343	0.0579067	0.0287215	0.00135441	-0.0283696	-0.0503385	-0.0742569	-0.0932328	-0.105187	-0.124714	-0.140461	0.00748488	0.00590177	0.00420517	0.00364981	0.00554503	0.00242322	0.00446499	0.00505673	0.0076456	0.00776438	0.0068254
0.862	0.0977865	0.0581466	0.0288036	0.00175699	-0.0285238	-0.0505265	-0.0742092	-0.0928614	-0.105792	-0.124528	-0.140318	0.00755774	0.00613087	0.00427691	0.00376918	0.00564623	0.00250869	0.00451043	0.00512065	0.00772729	0.00787512	0.00702448
0.863	0.098338	0.05831	0.0289156	0.00212527	-0.0285755	-0.0506802	-0.0741411	-0.0924752	-0.106401	-0.124414	-0.140239	0.00763686	0.00632604	0.00434092	0.00386475	0.00570507	0.00260963	0.00456085	0.00519026	0.00784717	0.00800653	0.0072294
0.864	0.0987517	0.0583864	0.0290541	0.00244631	-0.028523	-0.0507986	-0.0740573	-0.0920883	-0.106987	-0.124371	-0.140202	0.00770839	0.00647934	0.00439484	0.00392846	0.00571576	0.00271332	0.00460665	0.00525844	0.0079953	0.00815321	0.00743535
0.865	0.0989636	0.0583483	0.0292076	0.00270875	-0.028361	-0.0508657	-0.0739343	-0.0916792	-0.107488	-0.124345	-0.140129	0.00775447	0.00658808	0.00443745	0.00395685	0.0056746	0.00280991	0.00464235	0.0053189	0.00815586	0.00830431	0.00763241
0.866	0.0989861	0.0582154	0.0293808	0.00290318	-0.0281074	-0.0508977	-0.0737954	-0.0912826	-0.107914	-0.124359	-0.140033	0.00777009	0.00665683	0.00446965	0.00395193	0.00558396	0.00289986	0.00466489	0.00536021	0.00831834	0.00845283	0.00782132
0.867	0.0988401	0.058015	0.0295792	0.0030253	-0.0277845	-0.050915	-0.0736645	-0.0909319	-0.108288	-0.124431	-0.139929	0.00774824	0.00669066	0.00449425	0.00392123	0.00544813	0.00298783	0.00468007	0.00538408	0.00847576	0.00859732	0.00800572
0.868	0.0985377	0.0577663	0.0298041	0.0030728	-0.0274127	-0.0509288	-0.073547	-0.0906357	-0.108609	-0.124543	-0.139801	0.00768723	0.00669714	0.00451511	0.00387626	0.00527529	0.00308325	0.00469425	0.00539098	0.00862091	0.00873355	0.00818738
0.869	0.0981008	0.0574921	0.0300564	0.00304645	-0.0270148	-0.0509507	-0.0734462	-0.0903979	-0.108878	-0.124676	-0.139635	0.00759013	0.00668394	0.00453669	0.00383087	0.00507658	0.00319759	0.00471401	0.00538415	0.00874765	0.0088575	0.00836748
0.87	0.0975588	0.0572181	0.0303373	0.00294981	-0.0266142	-0.0509918	-0.0733632	-0.0902185	-0.109103	-0.124809	-0.139422	0.00746441	0.00665735	0.00456327	0.00379858	0.00486527	0.00334108	0.0047437	0.00536874	0.00885014	0.0089651	0.00854572
0.871	0.0969469	0.0569701	0.0306467	0.002789	-0.0262335	-0.051062	-0.0732972	-0.090093	-0.10929	-0.124919	-0.139156	0.00732099	0.00662148	0.00459829	0.00378963	0.00465556	0.00351983	0.00478385	0.00535069	0.00892239	0.00905245	0.00872019
0.872	0.0963026	0.0567727	0.0309831	0.00257224	-0.0258933	-0.0511687	-0.0732456	-0.0900137	-0.109451	-0.124988	-0.138837	0.00717289	0.00657809	0.00464384	0.00380855	0.00446112	0.00373411	0.00483095	0.00533555	0.00895837	0.00911604	0.0088879
0.873	0.095663	0.0566469	0.0313432	0.00230934	-0.0256105	-0.0513162	-0.0732042	-0.08997	-0.109592	-0.125	-0.138469	0.00703345	0.00652705	0.00470058	0.00385329	0.00429341	0.00397851	0.00487866	0.00532742	0.00895266	0.00915334	0.00904592
0.874	0.0950587	0.0566065	0.0317206	0.00201076	-0.0253972	-0.051504	-0.0731653	-0.0899464	-0.109718	-0.124941	-0.138058	0.00691503	0.0064669	0.00476794	0.00391623	0.00416004	0.00424411	0.00491997	0.00532941	0.00890287	0.009164	0.00919435
0.875	0.0945016	0.0566494	0.0321028	0.00168771	-0.0252565	-0.0517214	-0.0731111	-0.0899148	-0.109815	-0.124786	-0.137594	0.00682254	0.00639477	0.00484355	0.00398605	0.00406318	0.00451968	0.00495003	0.00534343	0.00880795	0.00914857	0.00933101
0.876	0.0939906	0.0567621	0.0324729	0.00135245	-0.025184	-0.0519475	-0.0730169	-0.0898381	-0.109855	-0.124508	-0.137056	0.00676256	0.00631197	0.0049253	0.00405095	0.00399962	0.00478878	0.00496329	0.00535895	0.00866266	0.00910293	0.00945532
0.877	0.093584	0.0569715	0.0328305	0.0010144	-0.0251891	-0.0521967	-0.0729129	-0.0897498	-0.109892	-0.124178	-0.136537	0.00673734	0.00621679	0.00501125	0.0041016	0.00396115	0.00504311	0.0049643	0.00537969	0.00847969	0.00903616	0.0095772
0.878	0.0932892	0.0572688	0.0331625	0.000682807	-0.0252647	-0.0524584	-0.0727972	-0.0896428	-0.109924	-0.123816	-0.136064	0.0067437	0.00610874	0.0050982	0.00413126	0.00393563	0.00527284	0.0049584	0.00540365	0.00826868	0.00895314	0.00970214
0.879	0.093104	0.0576383	0.0334552	0.000365509	-0.0253994	-0.05272	-0.0726687	-0.0895119	-0.109948	-0.123448	-0.13566	0.0067761	0.00598781	0.00518251	0.00413677	0.00390913	0.00546971	0.00495298	0.00542945	0.0080415	0.00885898	0.00983422
0.88	0.0930186	0.0580598	0.0336954	6.86713e-05	-0.0255784	-0.0529684	-0.0725275	-0.089355	-0.109957	-0.123099	-0.135348	0.00682814	0.00585479	0.00526027	0.0041185	0.0038676	0.00562719	0.00495542	0.00545675	0.00781082	0.00875858	0.00997443
0.881	0.0930169	0.0585094	0.0338711	-0.000203296	-0.0257849	-0.0531912	-0.0723755	-0.0891731	-0.109944	-0.122796	-0.135143	0.0068939	0.0057122	0.00532774	0.00407998	0.00379846	0.00574055	0.00497115	0.00548627	0.00758863	0.00865632	0.0101196
0.882	0.0930785	0.0589619	0.033973	-0.000447706	-0.0260011	-0.053378	-0.0722155	-0.0889706	-0.109901	-0.122563	-0.135058	0.00696884	0.0055657	0.00538186	0.00402729	0.00369169	0.00580699	0.00500228	0.00551949	0.00738485	0.00855612	0.0102626
0.883	0.0931807	0.059392	0.033995	-0.00066344	-0.0262097	-0.0535211	-0.0720521	-0.0887553	-0.109823	-0.12242	-0.135096	0.00705008	0.00542558	0.00542089	0.00396826	0.0035409	0.00582596	0.00504746	0.00555813	0.00720675	0.00846161	0.0103933
0.884	0.0932979	0.0597745	0.0339344	-0.000851043	-0.0263941	-0.0536149	-0.0718885	-0.0885348	-0.109703	-0.122377	-0.13525	0.00713646	0.00530785	0.00544511	0.00391154	0.00334433	0.00579993	0.00510263	0.00560443	0.00706019	0.0083768	0.0105015
0.885	0.0934045	0.0600861	0.0337921	-0.00101181	-0.0265399	-0.0536574	-0.0717273	-0.0883176	-0.109534	-0.122435	-0.135505	0.00722676	0.0052335	0.00545651	0.00386534	0.00310599	0.00573424	0.00516351	0.00565926	0.00694806	0.00830564	0.0105771
0.886	0.0934471	0.0602872	0.0335642	-0.00114606	-0.0266261	-0.0536354	-0.0715478	-0.0880813	-0.109278	-0.122545	-0.135789	0.00731516	0.00522343	0.00545742	0.00383605	0.00283723	0.00563581	0.0052267	0.00571768	0.0068648	0.00824797	0.010605
0.887	0.0934491	0.0603919	0.0332713	-0.00125594	-0.0266558	-0.0535742	-0.0713813	-0.0878719	-0.108978	-0.122739	-0.136129	0.00740681	0.00529993	0.00545486	0.0038276	0.00255907	0.00551511	0.00529113	0.0057771	0.00681246	0.00820708	0.010584
0.888	0.0934181	0.0604061	0.0329317	-0.00134374	-0.0266318	-0.0534943	-0.0712447	-0.0877169	-0.108663	-0.123023	-0.136524	0.00749875	0.00547063	0.00545385	0.00383981	0.00230461	0.00538824	0.00535982	0.00583714	0.00679168	0.00818672	0.0105159
0.889	0.0933559	0.0603335	0.0325624	-0.00141095	-0.0265566	-0.0534118	-0.0711443	-0.0876288	-0.108347	-0.123377	-0.136949	0.00758748	0.00572987	0.00545852	0.00386826	0.00211907	0.00527096	0.00543653	0.00589441	0.00679815	0.00818502	0.0104039
0.89	0.0932695	0.0601829	0.0321815	-0.00145832	-0.0264363	-0.0533438	-0.0710849	-0.087617	-0.108047	-0.123777	-0.137378	0.0076684	0.00605821	0.00547076	0.00390469	0.00205034	0.00517862	0.00552527	0.00594581	0.00682442	0.00819657	0.0102538
0.891	0.0931699	0.0599671	0.0318066	-0.00148576	-0.0262799	-0.0533067	-0.0710691	-0.0876866	-0.107778	-0.124196	-0.137785	0.0077364	0.00642716	0.0054897	0.00393826	0.00212457	0.00512388	0.00562851	0.00598929	0.00685978	0.00821262	0.0100727
0.892	0.0930712	0.0597019	0.0314538	-0.00149225	-0.0260987	-0.0533153	-0.0710981	-0.0878387	-0.107555	-0.124606	-0.138149	0.00778661	0.00680521	0.00551192	0.00395709	0.00232749	0.00511439	0.00574575	0.00602429	0.00689103	0.00822207	0.00986817
0.893	0.0929887	0.0594047	0.031136	-0.00147591	-0.0259055	-0.0533809	-0.0711706	-0.0880694	-0.107388	-0.124981	-0.138451	0.00781519	0.0071629	0.00553229	0.00394991	0.00261642	0.00515136	0.00587299	0.00605198	0.00690432	0.00821308	0.00964718
0.894	0.0929354	0.0590915	0.0308614	-0.00143443	-0.0257124	-0.0535085	-0.0712816	-0.0883686	-0.107283	-0.125297	-0.138675	0.00782054	0.00747687	0.00554541	0.00390736	0.00294546	0.00522934	0.00600337	0.00607576	0.00688836	0.00817489	0.00941762
0.895	0.0929231	0.0587779	0.0306336	-0.00136501	-0.0255315	-0.0536982	-0.071425	-0.0887228	-0.107242	-0.125534	-0.138812	0.00780295	0.00773072	0.00554649	0.00382314	0.00327824	0.00533761	0.00612841	0.00609941	0.00683548	0.00809953	0.00918663
0.896	0.092941	0.0584621	0.0304461	-0.00126409	-0.0253675	-0.0539356	-0.0715783	-0.0890959	-0.107238	-0.125653	-0.138834	0.00775831	0.00790947	0.00553057	0.00369454	0.00358988	0.00546314	0.00623878	0.00612487	0.00674008	0.00798227	0.00895519
0.897	0.092994	0.0581536	0.0302915	-0.00112824	-0.0252283	-0.0542072	-0.0717306	-0.089465	-0.107258	-0.125642	-0.138737	0.0076942	0.00801421	0.00549773	0.00352297	0.0038622	0.0055897	0.00632672	0.00615195	0.0066037	0.00782172	0.00872752
0.898	0.09312	0.0578847	0.0301701	-0.000956369	-0.0251322	-0.0545158	-0.0719029	-0.0898465	-0.107333	-0.125553	-0.138591	0.00761776	0.0080509	0.00544841	0.00331433	0.00408691	0.00570473	0.00639053	0.00618572	0.00644357	0.00762751	0.00851706
0.899	0.0933209	0.0576618	0.0300688	-0.000748223	-0.0250846	-0.0548424	-0.0720898	-0.0902244	-0.107453	-0.125402	-0.138419	0.00753518	0.00802934	0.00538336	0.00307777	0.0042603	0.00579579	0.00643035	0.00622528	0.00627843	0.00740997	0.0083324
0.9	0.0935938	0.0574876	0.0299724	-0.000505191	-0.0250877	-0.0551647	-0.0722865	-0.0905831	-0.107605	-0.125206	-0.138246	0.00745236	0.0079625	0.00530301	0.00282566	0.00438315	0.00585244	0.00644996	0.00626782	0.00613089	0.00718253	0.00818126
0.901	0.0939318	0.0573611	0.0298648	-0.0002305	-0.0251411	-0.055459	-0.0724882	-0.0909093	-0.107773	-0.124988	-0.1381	0.00737423	0.00786458	0.00520674	0.00257284	0.00445992	0.00586647	0.00645603	0.0063094	0.0060235	0.00696025	0.0080688
0.902	0.0943246	0.0572787	0.0297304	7.07011e-05	-0.0252415	-0.0557017	-0.072691	-0.0911926	-0.107942	-0.124772	-0.138006	0.00730429	0.00774927	0.00509269	0.00233558	0.00449788	0.00583209	0.00645692	0.00634596	0.00597422	0.00675812	0.00799605
0.903	0.0947595	0.057234	0.029556	0.000391392	-0.0253835	-0.0558715	-0.072892	-0.0914266	-0.1081	-0.12458	-0.137986	0.00724445	0.00762863	0.00495814	0.00213006	0.0045064	0.00574622	0.00646121	0.00637443	0.00599259	0.00658956	0.00795924
0.904	0.0952202	0.057218	0.0293308	0.000722891	-0.025559	-0.0559492	-0.0730869	-0.0916065	-0.108234	-0.124429	-0.138053	0.00719547	0.00751299	0.00480051	0.00197005	0.0044961	0.00560865	0.0064761	0.00639377	0.0060793	0.00646546	0.00795163
0.905	0.0956902	0.0572212	0.029049	0.00105511	-0.0257586	-0.0559214	-0.0732728	-0.0917323	-0.108335	-0.12433	-0.138215	0.007157	0.00741032	0.00461853	0.00186381	0.00447779	0.00542276	0.00650604	0.00640496	0.00622659	0.00639342	0.00796352
0.906	0.0961503	0.0572309	0.0287092	0.00137679	-0.025972	-0.0557807	-0.0734459	-0.0918054	-0.108396	-0.124288	-0.138468	0.00712543	0.00732343	0.00441259	0.00181166	0.00446162	0.00519697	0.00655172	0.00640993	0.00641751	0.0063749	0.00798157
0.907	0.096557	0.0572185	0.0283063	0.00167666	-0.0261799	-0.0555103	-0.0735807	-0.0918025	-0.10838	-0.124257	-0.138756	0.00709727	0.0072536	0.00418709	0.00180545	0.00445422	0.00494209	0.00660777	0.00640861	0.00663504	0.00640571	0.00798944
0.908	0.096938	0.057203	0.027862	0.0019444	-0.0263856	-0.055139	-0.0737078	-0.0917719	-0.108339	-0.124285	-0.139122	0.00707471	0.00720677	0.00395146	0.00183289	0.00445901	0.00467486	0.00666832	0.00640517	0.00687195	0.0064855	0.00798465
0.909	0.0972932	0.0571851	0.027393	0.00216951	-0.0265845	-0.0546865	-0.0738353	-0.0917352	-0.108295	-0.124371	-0.139561	0.00705593	0.00718403	0.00371647	0.00188034	0.00447595	0.00441588	0.00672551	0.0064014	0.00711996	0.00660728	0.00796687
0.91	0.097618	0.0571626	0.026917	0.00234275	-0.0267714	-0.0541737	-0.0739657	-0.0917064	-0.108263	-0.124503	-0.140049	0.00703897	0.0071841	0.00349438	0.00193571	0.00450032	0.00418693	0.00677011	0.00639573	0.00737294	0.00676057	0.00793684
0.911	0.0979098	0.0571353	0.026453	0.00245665	-0.0269423	-0.0536255	-0.0741016	-0.0916978	-0.108259	-0.124659	-0.14056	0.00702154	0.00720345	0.0032965	0.0019897	0.00452391	0.00400802	0.0067936	0.00638413	0.00762607	0.00693249	0.00789738
0.912	0.0981667	0.0571045	0.0260199	0.00250589	-0.0270953	-0.0530684	-0.0742449	-0.0917187	-0.108298	-0.124819	-0.141065	0.00700095	0.00723675	0.00313086	0.00203581	0.00453641	0.00389278	0.00678941	0.00636075	0.00787471	0.00710868	0.00785189
0.913	0.0983879	0.0570729	0.0256345	0.00248764	-0.0272295	-0.0525289	-0.0743972	-0.0917749	-0.108393	-0.12496	-0.141533	0.00697433	0.00727784	0.00300069	0.00207012	0.00452696	0.00384453	0.00675378	0.0063192	0.00811361	0.00727464	0.00780284
0.914	0.0985709	0.0570438	0.0253098	0.00240179	-0.0273449	-0.0520309	-0.0745579	-0.0918657	-0.108551	-0.125059	-0.141937	0.00693917	0.00732154	0.00290444	0.00209118	0.00448596	0.00385493	0.00668671	0.00625448	0.00833783	0.00741796	0.00775214
0.915	0.0987129	0.0570212	0.0250538	0.00225087	-0.0274428	-0.0515944	-0.0747257	-0.0919858	-0.108775	-0.125095	-0.14225	0.00689348	0.00736469	0.00283787	0.00210012	0.00440624	0.00390709	0.00659164	0.00616394	0.00854264	0.00752923	0.00769979
0.916	0.098817	0.0570129	0.024871	0.00203964	-0.0275276	-0.0512372	-0.074905	-0.0921314	-0.109069	-0.12506	-0.142461	0.00683527	0.00740634	0.00279792	0.00210061	0.00428313	0.0039816	0.00647352	0.00604651	0.00872149	0.00760045	0.00763971
0.917	0.0988463	0.057001	0.0247486	0.0017738	-0.0275918	-0.0509496	-0.0750685	-0.092258	-0.109385	-0.124902	-0.142508	0.0067594	0.00744706	0.00278329	0.00209851	0.00411785	0.00406003	0.00634072	0.00590366	0.00886653	0.00762392	0.00756383
0.918	0.0988179	0.0570039	0.0246843	0.00146305	-0.0276458	-0.0507423	-0.0752293	-0.0923667	-0.109731	-0.124643	-0.142415	0.00667264	0.00749328	0.00279776	0.00210141	0.00391102	0.00412842	0.00620043	0.00574374	0.00898258	0.00760936	0.00747112
0.919	0.0987509	0.0570407	0.0246694	0.00111897	-0.0277	-0.0506251	-0.0754049	-0.0924644	-0.11012	-0.124321	-0.142221	0.00657874	0.00755339	0.00284556	0.00211744	0.00367076	0.00418049	0.00606396	0.00557879	0.00907392	0.0075655	0.00736531
0.92	0.0986455	0.0571169	0.0246861	0.000753	-0.0277589	-0.0505885	-0.0755965	-0.0925363	-0.110532	-0.123952	-0.141941	0.00648256	0.00763158	0.00292883	0.00215226	0.0034076	0.00421572	0.00593904	0.00542051	0.0091462	0.0075039	0.00724959
0.921	0.0985016	0.0572363	0.0247137	0.00037694	-0.0278264	-0.0506177	-0.0758041	-0.0925685	-0.110949	-0.123555	-0.141597	0.00638993	0.00772792	0.0030448	0.00220741	0.00313465	0.00423897	0.00583102	0.00528017	0.00920618	0.00743752	0.00712982
0.922	0.0983196	0.0574008	0.0247303	2.41512e-06	-0.0279057	-0.0506934	-0.0760272	-0.0925491	-0.111348	-0.123153	-0.141211	0.00630698	0.00783717	0.00318498	0.0022794	0.00286676	0.00425891	0.00574261	0.00516679	0.00926042	0.00737864	0.0070138
0.923	0.0981009	0.0576104	0.0247147	-0.000359568	-0.0279987	-0.0507945	-0.0762644	-0.0924696	-0.111708	-0.122771	-0.140811	0.00623943	0.00794909	0.00333672	0.00236042	0.00261958	0.00428614	0.00567434	0.0050859	0.00931402	0.00733696	0.00690996
0.924	0.0978465	0.0578621	0.0246473	-0.000699098	-0.0281059	-0.0508986	-0.0765122	-0.0923246	-0.112011	-0.122429	-0.140418	0.00619176	0.00805002	0.00348606	0.00244022	0.00240871	0.00433105	0.00562568	0.00503924	0.00937068	0.00731897	0.00682703
0.925	0.0975586	0.0581507	0.0245128	-0.00100761	-0.0282263	-0.0509849	-0.0767656	-0.0921131	-0.112241	-0.122146	-0.140054	0.00616636	0.00812524	0.00362108	0.00250835	0.00224817	0.00440215	0.00559602	0.00502514	0.00943195	0.00732736	0.00677193
0.926	0.0972462	0.0584701	0.0243023	-0.00127757	-0.0283604	-0.0510377	-0.0770224	-0.0918451	-0.112391	-0.121944	-0.139741	0.00616339	0.0081614	0.00373532	0.00255621	0.00214776	0.00450483	0.00558482	0.00503861	0.009494	0.0073586	0.00674447
0.927	0.0969018	0.0588018	0.0240081	-0.00150331	-0.0285011	-0.0510364	-0.0772662	-0.0915191	-0.112443	-0.121815	-0.139471	0.0061783	0.00814957	0.00382747	0.0025784	0.00211463	0.00463983	0.00559241	0.00507131	0.00955108	0.0074062	0.00674151
0.928	0.0965116	0.0591222	0.0236268	-0.00168273	-0.0286387	-0.0509585	-0.0774715	-0.0911259	-0.112371	-0.121732	-0.139212	0.00620694	0.00808135	0.00390337	0.00257363	0.00214695	0.00480338	0.00561793	0.00511923	0.00960058	0.00746455	0.0067576
0.929	0.096122	0.0594408	0.0231781	-0.00181073	-0.0287808	-0.0508257	-0.0776607	-0.0907253	-0.112231	-0.121746	-0.139027	0.00624456	0.00795898	0.0039708	0.00254555	0.0022408	0.00499247	0.00566387	0.00517764	0.00964571	0.00753456	0.00679578
0.93	0.0957439	0.0597443	0.0226771	-0.00188524	-0.0289237	-0.0506426	-0.0778272	-0.0903409	-0.112039	-0.121852	-0.138909	0.00628378	0.00778702	0.00403978	0.00250216	0.00238854	0.00520032	0.00572963	0.00524083	0.00968625	0.0076137	0.00685218
0.931	0.0953866	0.0600183	0.0221428	-0.0019052	-0.0290626	-0.0504177	-0.0779628	-0.0899957	-0.111815	-0.122036	-0.138849	0.0063176	0.00757322	0.00411849	0.00245512	0.00258104	0.00541877	0.00581294	0.00530299	0.00972239	0.00769983	0.00692237
0.932	0.0950582	0.0602486	0.021597	-0.00187029	-0.0291925	-0.0501629	-0.0780599	-0.0897101	-0.111578	-0.122281	-0.13883	0.00634052	0.00732707	0.00421036	0.00241804	0.00280901	0.00563884	0.0059102	0.00535819	0.00975412	0.00779056	0.00700147
0.933	0.0947647	0.0604221	0.0210624	-0.00178069	-0.0293082	-0.0498926	-0.0781114	-0.0895016	-0.111349	-0.122564	-0.138831	0.00634943	0.00705813	0.00431273	0.00240375	0.0030636	0.0058512	0.00601738	0.00540065	0.00978062	0.00788249	0.00708409
0.934	0.0945092	0.060528	0.0205609	-0.00163701	-0.0294039	-0.0496217	-0.0781115	-0.0893815	-0.111146	-0.12286	-0.138832	0.00634424	0.00677483	0.00441734	0.00242127	0.00333673	0.00604664	0.00613134	0.00542571	0.00980032	0.00797147	0.00716476
0.935	0.0942921	0.0605589	0.0201119	-0.00144014	-0.0294738	-0.0493647	-0.0780559	-0.0893546	-0.110985	-0.123142	-0.138811	0.00632794	0.00648376	0.00451277	0.00247357	0.00362123	0.00621661	0.0062506	0.00543076	0.00981033	0.00805245	0.00723745
0.936	0.0941156	0.0605123	0.0197324	-0.00119095	-0.0295144	-0.0491364	-0.0779472	-0.089424	-0.110881	-0.123395	-0.138755	0.00630631	0.00618988	0.00458855	0.00255741	0.00391055	0.00635366	0.00637484	0.0054145	0.00980428	0.00811663	0.00729277
0.937	0.0939736	0.0603878	0.019433	-0.000890623	-0.0295203	-0.0489456	-0.0777861	-0.08958	-0.11084	-0.123595	-0.138648	0.00628618	0.00589755	0.00463631	0.00266512	0.00419884	0.00645203	0.00650542	0.00537965	0.00977694	0.00815706	0.00732312
0.938	0.0938311	0.0601738	0.0192113	-0.0005418	-0.0294769	-0.0487824	-0.0775533	-0.0897772	-0.110825	-0.123688	-0.138434	0.00627216	0.00561059	0.00465261	0.00278725	0.00447977	0.00650685	0.0066422	0.00533048	0.00971911	0.00816351	0.00731649
0.939	0.0937074	0.0598962	0.0190746	-0.000147052	-0.0293912	-0.0486637	-0.0772801	-0.0900239	-0.110867	-0.123702	-0.138157	0.00627327	0.00533579	0.00463648	0.00291672	0.0047485	0.00651905	0.00678803	0.00528334	0.00963554	0.00813838	0.00727821
0.94	0.0936058	0.0595772	0.0190209	0.000292262	-0.0292642	-0.0485939	-0.0769884	-0.0903109	-0.110973	-0.123654	-0.13784	0.00629132	0.00508343	0.004592	0.00304896	0.00499949	0.00649075	0.00693997	0.00525083	0.00952615	0.00808322	0.00720733
0.941	0.0935193	0.0592358	0.0190407	0.000772818	-0.0290949	-0.0485675	-0.0766934	-0.0906147	-0.111132	-0.12355	-0.1375	0.00632359	0.00486419	0.00452526	0.00318252	0.00522667	0.00642594	0.00709104	0.00524649	0.00939232	0.00800082	0.00710582
0.942	0.0934407	0.0588933	0.0191208	0.00129033	-0.0288833	-0.0485759	-0.0764113	-0.0909106	-0.111327	-0.123401	-0.137154	0.00636305	0.00468812	0.00444243	0.003319	0.00542384	0.0063302	0.00723049	0.00528137	0.00923661	0.00789608	0.00697836
0.943	0.0933635	0.0585715	0.0192457	0.00183943	-0.0286302	-0.0486079	-0.0761577	-0.0911752	-0.111542	-0.123222	-0.136824	0.00639958	0.00456168	0.00434789	0.00346202	0.00558521	0.00620985	0.00734512	0.00536154	0.009062	0.00777535	0.00683204
0.944	0.0932825	0.0582917	0.0193992	0.00241355	-0.0283376	-0.0486509	-0.0759469	-0.0913872	-0.111755	-0.123029	-0.136534	0.00642181	0.00448502	0.00424328	0.00361578	0.00570626	0.00607107	0.00742143	0.00548703	0.00887158	0.00764604	0.00667616
0.945	0.0931936	0.0580733	0.0195655	0.00300499	-0.0280082	-0.0486923	-0.0757902	-0.0915293	-0.111946	-0.12284	-0.136304	0.0064191	0.00445076	0.00412809	0.00378349	0.00578454	0.00591906	0.00744795	0.00565207	0.00866785	0.00751589	0.00652117
0.946	0.0930999	0.0579333	0.0197323	0.00360454	-0.0276472	-0.0487238	-0.0756991	-0.0915948	-0.112102	-0.122678	-0.136161	0.00638458	0.00444505	0.00400238	0.00396596	0.0058204	0.00575665	0.00741706	0.00584673	0.00844965	0.00738967	0.00637608
0.947	0.0930034	0.057883	0.0198895	0.00420216	-0.0272598	-0.0487374	-0.0756787	-0.0915801	-0.112206	-0.122559	-0.13612	0.00631452	0.00445102	0.00386788	0.0041609	0.00581771	0.00558508	0.00732684	0.00605953	0.00821676	0.00727329	0.00625067
0.948	0.0928903	0.0579183	0.0200266	0.00478698	-0.0268438	-0.048718	-0.0757129	-0.0914695	-0.112226	-0.12247	-0.136165	0.00620727	0.00445191	0.00373171	0.00436236	0.00578324	0.00540259	0.00718068	0.00627777	0.00796388	0.0071695	0.00614781
0.949	0.092765	0.0580375	0.0201403	0.00534606	-0.0264076	-0.0486655	-0.0757954	-0.0912662	-0.112148	-0.122415	-0.136297	0.00607058	0.00443506	0.00360719	0.00456151	0.00572703	0.00520881	0.00698875	0.00649244	0.00769475	0.00708197	0.00607769
0.95	0.0926621	0.0582505	0.0202403	0.00586957	-0.0259663	-0.0485947	-0.0759394	-0.0910149	-0.112004	-0.122441	-0.13656	0.00591026	0.0043943	0.00351285	0.0047489	0.0056611	0.00500342	0.00676742	0.00669693	0.00741381	0.00702048	0.00604499
0.951	0.0925912	0.0585464	0.020332	0.00634659	-0.0255278	-0.0485112	-0.0761323	-0.0907359	-0.111795	-0.122546	-0.136949	0.00573507	0.00432883	0.00346925	0.00491372	0.00559651	0.00478635	0.00653464	0.00688575	0.0071255	0.00698922	0.00605008
0.952	0.0925611	0.0589096	0.020423	0.00676697	-0.0251002	-0.0484231	-0.0763578	-0.0904508	-0.111526	-0.122728	-0.137451	0.00555434	0.00424349	0.00349148	0.00504575	0.00554178	0.00455952	0.00630801	0.00705487	0.00683676	0.00699076	0.00609055
0.953	0.0925796	0.0593213	0.0205226	0.00712183	-0.024691	-0.0483399	-0.0765968	-0.090181	-0.111205	-0.122975	-0.138048	0.00537703	0.00414736	0.00358204	0.0051364	0.00550132	0.00432756	0.00610157	0.00720106	0.00655684	0.00702521	0.00616171
0.954	0.0926515	0.0597608	0.0206396	0.00740383	-0.0243071	-0.0482708	-0.0768284	-0.0899454	-0.110841	-0.123273	-0.138716	0.00521108	0.00405171	0.00372842	0.00517966	0.0054747	0.00409829	0.00592336	0.00732144	0.00629691	0.00708997	0.00625759
0.955	0.0927788	0.0602076	0.0207817	0.0076074	-0.0239542	-0.0482233	-0.077031	-0.0897576	-0.110443	-0.123601	-0.139428	0.00506349	0.00396728	0.00390684	0.00517277	0.00545723	0.00388297	0.00577468	0.00741322	0.00606868	0.00717968	0.00637168
0.956	0.0929654	0.0606453	0.0209558	0.00772975	-0.023638	-0.0482078	-0.0771895	-0.0896313	-0.110027	-0.123945	-0.140161	0.00494355	0.00390132	0.00408978	0.00511676	0.00544135	0.00369295	0.00564916	0.007473	0.00588001	0.00728349	0.00649505
0.957	0.0932088	0.0610599	0.0211645	0.00777038	-0.023362	-0.0482297	-0.0772887	-0.0895702	-0.109603	-0.124285	-0.14089	0.00485956	0.0038564	0.00425145	0.00501656	0.00541876	0.00354142	0.00553773	0.00749801	0.00573752	0.00739092	0.00662081
0.958	0.093497	0.0614383	0.0214054	0.00773134	-0.0231261	-0.0482878	-0.0773119	-0.0895646	-0.109175	-0.124591	-0.141579	0.00481923	0.00382849	0.00437293	0.00488086	0.00538167	0.00343996	0.00543098	0.00748608	0.00564169	0.00748976	0.00674143
0.959	0.0938016	0.0617653	0.0216687	0.00761536	-0.0229256	-0.0483713	-0.077235	-0.0895804	-0.108726	-0.124815	-0.142173	0.00482994	0.00381047	0.00444219	0.00472066	0.00532359	0.00339557	0.00532114	0.00743426	0.00558863	0.00756854	0.00684917
0.96	0.094139	0.0620608	0.021953	0.0074297	-0.0227684	-0.0484917	-0.0770809	-0.0896301	-0.108296	-0.124986	-0.142701	0.00489635	0.00379354	0.0044562	0.00455097	0.0052426	0.00341038	0.005207	0.00734469	0.00557484	0.00762447	0.00694494
0.961	0.0945023	0.0623376	0.0222483	0.00718344	-0.0226543	-0.048646	-0.0768591	-0.0896995	-0.107899	-0.125101	-0.14316	0.00501632	0.00376678	0.00442005	0.00438702	0.00513706	0.00347913	0.00508998	0.00722001	0.00558935	0.00765316	0.0070265
0.962	0.0948771	0.0626095	0.0225407	0.00688664	-0.0225809	-0.0488264	-0.076579	-0.089764	-0.107541	-0.125158	-0.143546	0.00518135	0.00372199	0.00434408	0.00424229	0.00500571	0.00359086	0.00497328	0.0070634	0.00561987	0.00765282	0.00709165
0.963	0.0952481	0.0628935	0.0228154	0.00655027	-0.0225448	-0.0490237	-0.0762531	-0.0897974	-0.107223	-0.125155	-0.143855	0.00537706	0.00365503	0.0042418	0.00412664	0.00484686	0.00373165	0.0048603	0.00687893	0.00565476	0.00762446	0.00713851
0.964	0.0955991	0.0632068	0.0230578	0.00618557	-0.0225426	-0.0492278	-0.0758956	-0.0897732	-0.106946	-0.125096	-0.144087	0.00558548	0.00356693	0.00412705	0.00404463	0.00465794	0.00388718	0.00475305	0.00667128	0.00568463	0.00757164	0.00716571
0.965	0.0959138	0.0635653	0.0232552	0.00580315	-0.0225703	-0.0494282	-0.0755206	-0.089667	-0.106707	-0.124986	-0.144245	0.0057883	0.00346412	0.0040114	0.00399497	0.00443566	0.00404466	0.00465157	0.00644548	0.00570333	0.00750005	0.00717265
0.966	0.096183	0.0639852	0.0233987	0.00541338	-0.0226255	-0.0496193	-0.0751469	-0.0894642	-0.106508	-0.124842	-0.144339	0.0059706	0.00336034	0.00390264	0.00397134	0.00417664	0.00419143	0.00455292	0.00620629	0.00570736	0.00741542	0.0071571
0.967	0.0963966	0.0644753	0.0234831	0.00502515	-0.0227054	-0.0497954	-0.0747885	-0.0891535	-0.106346	-0.124678	-0.144378	0.00612193	0.00327281	0.00380444	0.00396431	0.00387961	0.00431803	0.00445519	0.00595913	0.00569653	0.0073252	0.00711936
0.968	0.0965475	0.0650376	0.0235077	0.00464565	-0.022808	-0.0499534	-0.0744566	-0.0887316	-0.106218	-0.12451	-0.144369	0.00623821	0.00322064	0.00371798	0.00396338	0.00354711	0.00441733	0.0043588	0.00571015	0.00567272	0.0072371	0.00706109
0.969	0.096606	0.0656512	0.0234717	0.00427775	-0.0229241	-0.0500786	-0.0741392	-0.0881809	-0.106091	-0.124321	-0.144285	0.0063176	0.00322088	0.00364438	0.00395901	0.00318567	0.00448465	0.00426861	0.00546593	0.00563613	0.00715523	0.00698284
0.97	0.0965894	0.0663125	0.0233887	0.00392465	-0.0230604	-0.050181	-0.073851	-0.0875257	-0.105977	-0.124146	-0.144154	0.00637387	0.00328502	0.00358614	0.00394256	0.00281386	0.00451575	0.00419254	0.00523387	0.00559129	0.00709075	0.00689129
0.971	0.0965179	0.0670097	0.0232773	0.00358914	-0.0232211	-0.0502734	-0.0736052	-0.0868061	-0.105892	-0.124028	-0.14401	0.00641771	0.00341297	0.00355089	0.00390752	0.00246019	0.00451207	0.00414537	0.00502665	0.00554003	0.0070497	0.00679535
0.972	0.0963988	0.0677154	0.0231547	0.00327013	-0.0234069	-0.0503603	-0.0733975	-0.0860501	-0.105831	-0.123979	-0.143859	0.0064617	0.0035966	0.0035476	0.00384899	0.00216422	0.00447577	0.00414024	0.00485513	0.00548164	0.00703657	0.00670295
0.973	0.096241	0.0683972	0.0230403	0.00296478	-0.0236189	-0.0504466	-0.0732197	-0.0852893	-0.10579	-0.124011	-0.143703	0.00651592	0.00382201	0.00358435	0.00376387	0.0019716	0.00441126	0.0041855	0.00472893	0.00541357	0.00705405	0.00662231
0.974	0.0960544	0.0690198	0.0229535	0.00266871	-0.0238571	-0.0505355	-0.0730605	-0.0845561	-0.105762	-0.124128	-0.143544	0.00658546	0.00407345	0.0036646	0.00365124	0.00191371	0.00432502	0.0042809	0.00465426	0.00533245	0.00710262	0.00656122
0.975	0.0958481	0.0695475	0.0229119	0.00237605	-0.0241206	-0.0506278	-0.0729057	-0.0838814	-0.105739	-0.124328	-0.143378	0.00666956	0.00433632	0.00378465	0.00351307	0.00198228	0.0042255	0.00441703	0.00463213	0.00523607	0.00718051	0.00652636
0.976	0.0956362	0.0699513	0.0229322	0.00208171	-0.0244088	-0.0507252	-0.0727459	-0.0832962	-0.105719	-0.124613	-0.14321	0.00676187	0.00459836	0.00393343	0.00335589	0.00213027	0.00412083	0.00457545	0.00465536	0.00512232	0.00728352	0.00651936
0.977	0.0954286	0.0702063	0.0230254	0.00178026	-0.0247188	-0.0508252	-0.0725702	-0.0828234	-0.105696	-0.124973	-0.143037	0.00685357	0.00485022	0.00409535	0.003192	0.00230242	0.00402003	0.00473576	0.00471206	0.00499426	0.00740558	0.00654002
0.978	0.0952335	0.0702961	0.0231975	0.00146698	-0.0250465	-0.0509225	-0.0723701	-0.0824785	-0.105667	-0.125396	-0.142857	0.00693624	0.00508514	0.00425385	0.00304062	0.00245544	0.00393098	0.00487915	0.00478697	0.00486012	0.00753936	0.00658488
0.979	0.0950469	0.0702082	0.0234454	0.00113805	-0.0253832	-0.0510042	-0.0721339	-0.0822606	-0.105617	-0.125851	-0.142654	0.0070027	0.00529766	0.00439473	0.00292705	0.00256316	0.00386011	0.00499208	0.0048632	0.00473324	0.00767573	0.00664785
0.98	0.0948593	0.0699409	0.0237591	0.000789319	-0.0257199	-0.0510511	-0.0718497	-0.0821515	-0.105527	-0.126298	-0.142406	0.00705332	0.00548544	0.00450577	0.00287895	0.00261182	0.00380613	0.00506452	0.00492483	0.00462694	0.0078071	0.00671715
0.981	0.0947006	0.0695273	0.0241359	0.000422491	-0.0260563	-0.0510698	-0.0715434	-0.0821696	-0.105433	-0.126757	-0.142156	0.0070961	0.00564504	0.00458344	0.00291613	0.0025987	0.00376952	0.00509719	0.00496426	0.00456367	0.00792959	0.00678815
0.982	0.0945704	0.0689951	0.0245594	3.93025e-05	-0.0263847	-0.0510503	-0.0712242	-0.0822972	-0.105339	-0.127206	-0.141905	0.00714162	0.00577411	0.00462744	0.00304167	0.00252924	0.00374499	0.00509449	0.00497469	0.00455761	0.00803894	0.00685167
0.983	0.0944639	0.0683792	0.0250086	-0.000356848	-0.0266974	-0.0509822	-0.070903	-0.0825081	-0.105249	-0.127625	-0.141653	0.00720278	0.00587119	0.004641	0.0032398	0.00241451	0.00372454	0.00506441	0.00495326	0.00461388	0.00813267	0.00689847
0.984	0.0943729	0.0677199	0.0254599	-0.000760964	-0.0269872	-0.0508563	-0.0705929	-0.0827705	-0.105164	-0.12799	-0.141397	0.0072918	0.00593629	0.00462955	0.00348211	0.00226902	0.0036992	0.00501657	0.00490108	0.00472695	0.00821009	0.00692027
0.985	0.0942863	0.0670582	0.0258889	-0.00116674	-0.0272481	-0.0506646	-0.0703058	-0.0830491	-0.105085	-0.128278	-0.141133	0.0074173	0.00597157	0.00459924	0.00373669	0.00210892	0.00366059	0.00496051	0.00482343	0.00488288	0.00827233	0.00691069
0.986	0.0941964	0.0664388	0.0262731	-0.00156704	-0.0274776	-0.0504064	-0.0700599	-0.0833127	-0.105021	-0.128479	-0.140864	0.00758179	0.00598206	0.00455554	0.00397478	0.0019495	0.00360343	0.00490163	0.00472532	0.00506049	0.00832045	0.00686331
0.987	0.0940924	0.0658989	0.0265925	-0.00195434	-0.027675	-0.0500828	-0.0698687	-0.0835305	-0.104972	-0.128581	-0.140587	0.00778213	0.00597592	0.00450328	0.00417426	0.0018054	0.00352585	0.00484348	0.00461547	0.00523982	0.0083565	0.00677535
0.988	0.0939641	0.0654682	0.0268316	-0.00232121	-0.0278425	-0.0496993	-0.0697433	-0.0836769	-0.104942	-0.128578	-0.140301	0.00801044	0.00596421	0.0044469	0.00432098	0.00169034	0.00343061	0.00478699	0.00450358	0.00540437	0.00838256	0.0066469
0.989	0.0938005	0.0651644	0.02698	-0.00266076	-0.0279847	-0.0492641	-0.0696903	-0.0837324	-0.104926	-0.128465	-0.140001	0.0082556	0.00595969	0.00439148	0.0044091	0.00161775	0.00332582	0.00473188	0.00439898	0.00554284	0.00840004	0.00648139
0.99	0.0935739	0.0649814	0.0270274	-0.00296698	-0.0281037	-0.0487786	-0.0696989	-0.0836683	-0.104898	-0.128217	-0.139657	0.00850416	0.00597441	0.00434317	0.00444112	0.00160072	0.00322455	0.00467697	0.00430739	0.00564773	0.00840746	0.00628446
0.991	0.0933022	0.0649281	0.0269855	-0.00323591	-0.028216	-0.04827	-0.0697836	-0.083503	-0.104879	-0.127873	-0.139299	0.00875119	0.00602217	0.00431279	0.00442576	0.00164659	0.0031418	0.00462305	0.00423808	0.00572159	0.00840777	0.00606587
0.992	0.0929946	0.064991	0.0268679	-0.00346457	-0.0283352	-0.047762	-0.0699464	-0.0832566	-0.104873	-0.127461	-0.138944	0.00898814	0.00610999	0.00431229	0.00437737	0.00175526	0.00309574	0.00457484	0.00419532	0.00576938	0.00840254	0.00584082
0.993	0.0926534	0.0651401	0.0266905	-0.00365181	-0.0284729	-0.0472724	-0.0701778	-0.0829464	-0.10487	-0.126998	-0.138594	0.00920919	0.00624016	0.00435285	0.00431349	0.00191634	0.00309964	0.00453674	0.00417879	0.00579733	0.00839235	0.00562467
0.994	0.0922824	0.0653355	0.0264736	-0.00379812	-0.0286394	-0.0468171	-0.0704636	-0.0825958	-0.104857	-0.126505	-0.13825	0.00940993	0.00640955	0.00444182	0.0042521	0.0021117	0.00315845	0.00451314	0.00418474	0.00581187	0.00837822	0.00543361
0.995	0.0918855	0.0655303	0.0262396	-0.00390575	-0.0288423	-0.0464078	-0.0707842	-0.0822297	-0.104818	-0.125996	-0.137914	0.00958658	0.0066112	0.00457964	0.00420871	0.00231942	0.0032664	0.00450723	0.00420746	0.00581899	0.00836271	0.00528314
0.996	0.0914732	0.0656778	0.0260128	-0.00397738	-0.0290878	-0.0460571	-0.0711242	-0.0818798	-0.104741	-0.125494	-0.137593	0.00973596	0.00683503	0.00475847	0.00419444	0.00251802	0.0034101	0.00451851	0.00423639	0.00581949	0.00834675	0.00518388
0.997	0.0910528	0.0657317	0.0258159	-0.00401693	-0.0293768	-0.0457706	-0.0714641	-0.0815733	-0.10461	-0.125016	-0.137291	0.00985485	0.00707114	0.00496326	0.00421491	0.00268837	0.00357092	0.00454426	0.00426226	0.00581408	0.00833282	0.00514119
0.998	0.090632	0.065651	0.0256685	-0.00402868	-0.0297054	-0.0455493	-0.0717849	-0.0813336	-0.104411	-0.124571	-0.137012	0.00994047	0.00731088	0.00517457	0.00427113	0.00281555	0.00372989	0.00458004	0.0042764	0.00580267	0.0083235	0.00515368
0.999	0.0902173	0.0654042	0.0255857	-0.00401676	-0.0300648	-0.0453893	-0.0720691	-0.0811781	-0.104134	-0.124166	-0.136759	0.00999103	0.00754749	0.00537191	0.00436135	0.00289017	0.00387083	0.00462129	0.00427163	0.00578563	0.00832095	0.00521402
1	0.0898011	0.064962	0.0255728	-0.00398359	-0.0304381	-0.0452748	-0.0722936	-0.0811058	-0.103755	-0.123783	-0.136515	0.0100037	0.00777427	0.00553673	0.00448336	0.002909	0.00398289	0.00466436	0.00424124	0.00576338	0.00832459	0.00530971
1.001	0.0893864	0.0643207	0.0256329	-0.00393248	-0.0308062	-0.0451934	-0.0724466	-0.0811141	-0.10327	-0.123413	-0.136279	0.00998412	0.00798869	0.0056544	0.00463425	0.00287679	0.00405788	0.00470749	0.00418431	0.00573971	0.00833314	0.00542544
1.002	0.0889953	0.0635011	0.0257672	-0.00386521	-0.0311547	-0.0451435	-0.0725353	-0.0812171	-0.102708	-0.123077	-0.136082	0.00993616	0.00818883	0.00571483	0.00480969	0.00280499	0.0040964	0.00475464	0.00410305	0.00572339	0.00834868	0.0055541
1.003	0.088626	0.0625242	0.0259639	-0.00378161	-0.0314606	-0.0451093	-0.0725544	-0.0813979	-0.102075	-0.122759	-0.135922	0.00986554	0.00837119	0.00571338	0.00500366	0.00271139	0.00410322	0.00480887	0.00400123	0.00572098	0.00836805	0.00568632
1.004	0.0882735	0.0614223	0.0262044	-0.00367999	-0.0317008	-0.0450743	-0.0725013	-0.0816309	-0.101383	-0.122439	-0.13579	0.00977858	0.0085318	0.00565074	0.005207	0.00261792	0.00408794	0.00487278	0.00388549	0.00573818	0.0083869	0.00581536
1.005	0.0879275	0.060235	0.0264648	-0.00355747	-0.0318528	-0.0450213	-0.0723719	-0.0818819	-0.100641	-0.122088	-0.135668	0.00968098	0.00866671	0.00553249	0.00540708	0.00254642	0.00406385	0.00494751	0.00376602	0.00577939	0.00840203	0.00593901
1.006	0.0875823	0.0590091	0.0267186	-0.00340936	-0.0318997	-0.0449391	-0.0721714	-0.0821196	-0.0998694	-0.121687	-0.135546	0.00957683	0.00877175	0.00536826	0.00558876	0.00251442	0.00404725	0.00502906	0.00365148	0.00584329	0.00840602	0.00605333
1.007	0.0872273	0.0577913	0.0269372	-0.00323051	-0.0318285	-0.0448171	-0.071902	-0.0823084	-0.0990848	-0.12121	-0.135404	0.00946777	0.00884449	0.00517112	0.00573585	0.0025291	0.00405393	0.00511131	0.00355309	0.00592772	0.00839518	0.00615973
1.008	0.0868518	0.0566254	0.0270925	-0.00301548	-0.031633	-0.0446485	-0.0715662	-0.0824149	-0.0983034	-0.120638	-0.13522	0.00935319	0.00888483	0.00495653	0.00583337	0.00258643	0.00409712	0.00518611	0.00348137	0.00602928	0.0083678	0.00626255
1.009	0.086446	0.0555482	0.0271594	-0.002759	-0.0313147	-0.0444307	-0.0711668	-0.0824111	-0.09754	-0.119951	-0.134971	0.00923112	0.0088956	0.00474137	0.00586962	0.00267465	0.00418528	0.005245	0.0034447	0.00614499	0.00832462	0.00636908
1.01	0.0859971	0.0545833	0.0271161	-0.00245637	-0.0308828	-0.0441624	-0.0707026	-0.0822723	-0.0968002	-0.119133	-0.134628	0.00909845	0.0088821	0.00454242	0.00583832	0.00277989	0.00432066	0.00528053	0.00344813	0.00627289	0.00826823	0.00648834
1.011	0.0854859	0.0537367	0.0269453	-0.00210376	-0.0303508	-0.0438403	-0.0701649	-0.081973	-0.0960752	-0.11816	-0.134147	0.00895495	0.00885165	0.00437509	0.00573952	0.00289246	0.00449767	0.00528829	0.00349119	0.00641281	0.00820268	0.00662937
1.012	0.0849317	0.0530247	0.0266468	-0.00170031	-0.029748	-0.0434863	-0.0695715	-0.0815344	-0.0953951	-0.117067	-0.133546	0.00880586	0.00881575	0.00425231	0.0055785	0.00300442	0.00470975	0.00526976	0.00357275	0.00657164	0.00813881	0.0068097
1.013	0.084339	0.0524379	0.0262233	-0.0012469	-0.0291059	-0.0431142	-0.0689263	-0.0809724	-0.0947638	-0.115871	-0.132819	0.00865758	0.00878406	0.00418122	0.00536725	0.00311247	0.00494727	0.0052289	0.00368889	0.00675523	0.00808621	0.00704256
1.014	0.0837087	0.0519509	0.0256843	-0.000746821	-0.0284571	-0.0427353	-0.0682281	-0.0803062	-0.0941733	-0.114589	-0.131957	0.00852016	0.00876374	0.00416226	0.00512244	0.00321652	0.00519932	0.00517288	0.00383397	0.00696846	0.00805421	0.0073372
1.015	0.0830404	0.0515258	0.0250454	-0.000206052	-0.0278346	-0.0423585	-0.0674721	-0.0795597	-0.0936076	-0.11324	-0.130953	0.0084063	0.00875916	0.00418913	0.00486321	0.00331699	0.00545682	0.00511187	0.00400292	0.00721575	0.00805315	0.00770073
1.016	0.0823413	0.0511208	0.0243309	0.000367552	-0.0272709	-0.041995	-0.0666603	-0.0787686	-0.0930522	-0.111851	-0.129811	0.00832649	0.00876874	0.00425005	0.00460823	0.00341328	0.00571037	0.00505469	0.0041902	0.00749422	0.0080876	0.00812842
1.017	0.0816146	0.0506882	0.0235682	0.000963662	-0.0267936	-0.0416508	-0.0657917	-0.0779676	-0.0924862	-0.110448	-0.128537	0.00828877	0.00878793	0.00433026	0.00437256	0.00350298	0.00595449	0.00501008	0.00439157	0.00780001	0.00816203	0.00861358
1.018	0.0808633	0.0501812	0.0227876	0.00157017	-0.0264237	-0.0413283	-0.0648666	-0.077191	-0.0918875	-0.109055	-0.127141	0.0082958	0.0088096	0.00441451	0.004165	0.00358246	0.00618666	0.00498481	0.00460325	0.00812687	0.00827811	0.00914531
1.019	0.0800888	0.0495578	0.0220201	0.00217374	-0.0261738	-0.0410264	-0.0638875	-0.0764704	-0.091235	-0.107694	-0.125639	0.00834397	0.00882574	0.00448916	0.00398707	0.0036483	0.00640715	0.00498325	0.00482162	0.00846743	0.0084345	0.00971011
1.02	0.0792913	0.0487842	0.021295	0.0027604	-0.026047	-0.0407397	-0.0628591	-0.0758315	-0.0905099	-0.106382	-0.124047	0.00842409	0.00882908	0.00454369	0.00383416	0.00369903	0.00661841	0.00500764	0.00504299	0.00881458	0.00862701	0.0102935
1.021	0.0784521	0.0478285	0.0206361	0.00331632	-0.0260317	-0.0404508	-0.0617765	-0.0752753	-0.089676	-0.105106	-0.122359	0.00852047	0.00881296	0.00457125	0.00369947	0.00373664	0.00682348	0.00505743	0.00526256	0.00915966	0.00884636	0.0108771
1.022	0.07758	0.0466893	0.0200664	0.00382833	-0.026113	-0.040154	-0.0606585	-0.0748217	-0.0887399	-0.103889	-0.120614	0.00862274	0.00877554	0.00456984	0.00357409	0.00376694	0.00702553	0.00513333	0.00547551	0.00950023	0.00908546	0.0114521
1.023	0.076682	0.0453821	0.0196026	0.00428473	-0.0262698	-0.0398429	-0.0595281	-0.0744829	-0.0877158	-0.102747	-0.118854	0.00871966	0.00871683	0.00454101	0.0034545	0.00379865	0.00722889	0.0052348	0.00568049	0.00983524	0.0093361	0.012009
1.024	0.0757494	0.0439269	0.0192507	0.00467567	-0.0264688	-0.0395022	-0.0583988	-0.0742465	-0.0866071	-0.101669	-0.117096	0.00880257	0.00863698	0.00448981	0.00334149	0.00384243	0.00743336	0.00535971	0.00587408	0.0101625	0.00958704	0.0125389
1.025	0.074768	0.0423544	0.0190072	0.00499423	-0.0266714	-0.0391144	-0.0572812	-0.0740869	-0.0854205	-0.100635	-0.115347	0.00886912	0.00853781	0.00442411	0.00324021	0.00390795	0.00763647	0.00550681	0.00605512	0.0104817	0.00982875	0.0130384
1.026	0.0737304	0.0407088	0.0188636	0.00523542	-0.0268381	-0.0386672	-0.0561926	-0.0739772	-0.0841723	-0.099626	-0.113619	0.00891617	0.00841788	0.00435243	0.00315833	0.00400083	0.00782958	0.00566777	0.00621974	0.0107878	0.0100476	0.0134975
1.027	0.0726251	0.0390385	0.0188028	0.00539763	-0.0269301	-0.0381483	-0.0551461	-0.0738812	-0.0828797	-0.098617	-0.111913	0.00894688	0.00827708	0.00428348	0.00310367	0.00412167	0.00800279	0.00583541	0.00636728	0.0110774	0.010234	0.013913
1.028	0.0714423	0.0373941	0.0188017	0.00548229	-0.0269128	-0.0375482	-0.054153	-0.07376	-0.0815625	-0.0975799	-0.110225	0.00896705	0.00811551	0.00422452	0.00308218	0.00426605	0.00814462	0.00600189	0.00649883	0.0113468	0.010381	0.0142831
1.029	0.070175	0.0358247	0.0188331	0.00549376	-0.0267588	-0.0368621	-0.0532232	-0.0735751	-0.0802413	-0.096489	-0.108546	0.00898368	0.00793455	0.00418031	0.00309714	0.00442628	0.00824338	0.00615952	0.00661727	0.0115921	0.0104851	0.0146081
1.03	0.0688205	0.034374	0.0188677	0.0054391	-0.0264505	-0.0360897	-0.0523639	-0.0732922	-0.078936	-0.0953217	-0.106863	0.00900364	0.00773816	0.00415264	0.00314981	0.00459369	0.00828862	0.0063018	0.00672712	0.0118105	0.0105466	0.0148899
1.031	0.0673736	0.0330735	0.018875	0.0053279	-0.02598	-0.035232	-0.0515743	-0.0728749	-0.0776546	-0.094052	-0.10515	0.00903142	0.00753349	0.0041408	0.00324079	0.00475998	0.00827206	0.00642321	0.00683376	0.0119984	0.0105693	0.0151301
1.032	0.0658331	0.0319392	0.0188257	0.00517211	-0.0253505	-0.0342943	-0.0508492	-0.0722971	-0.0764003	-0.09266	-0.103379	0.00906995	0.00733194	0.00414109	0.00337019	0.0049204	0.00818815	0.00652098	0.00694133	0.0121551	0.0105595	0.0153316
1.033	0.0642349	0.0309964	0.018701	0.00498296	-0.0245865	-0.0333027	-0.050207	-0.0715731	-0.075212	-0.0911753	-0.101571	0.00912355	0.00715	0.00414871	0.00353864	0.00507154	0.00803789	0.00659728	0.00705894	0.0122849	0.0105329	0.0155038
1.034	0.0625969	0.0302421	0.0184826	0.00477305	-0.0237167	-0.0322756	-0.0496447	-0.0707063	-0.0740952	-0.0896065	-0.0997156	0.00919158	0.00700416	0.00415847	0.00374462	0.00521153	0.00782449	0.00665389	0.00719184	0.0123897	0.0105035	0.0156518
1.035	0.0609357	0.0296564	0.0181561	0.00455504	-0.0227773	-0.0312304	-0.0491522	-0.0697055	-0.0730439	-0.0879641	-0.0977997	0.00927322	0.00691047	0.00416588	0.00398284	0.00533913	0.00755604	0.00669583	0.00734517	0.0124736	0.0104875	0.0157831
1.036	0.0592754	0.0292125	0.0177174	0.00434079	-0.0218115	-0.0301901	-0.0487227	-0.0685946	-0.0720517	-0.0862715	-0.0958215	0.00936143	0.00687472	0.0041659	0.00424321	0.00545167	0.00724069	0.00672325	0.00751683	0.0125355	0.010494	0.0158965
1.037	0.0576365	0.0288716	0.0171672	0.00414088	-0.0208645	-0.0291754	-0.0483443	-0.0674006	-0.0711038	-0.0845524	-0.0937797	0.00945118	0.00689561	0.00415516	0.00451106	0.00554547	0.00689036	0.00673864	0.00770466	0.0125758	0.0105313	0.015993
1.038	0.0560377	0.0285892	0.0165123	0.0039642	-0.0199802	-0.0282056	-0.048003	-0.0661554	-0.070182	-0.082833	-0.0916782	0.00953735	0.00696211	0.00413181	0.00476865	0.00561566	0.00651856	0.0067442	0.00790436	0.0125934	0.0106032	0.0160721
1.039	0.054495	0.0283188	0.0157649	0.00381758	-0.0191982	-0.0272979	-0.0476847	-0.0648925	-0.0692663	-0.0811402	-0.0895268	0.00961494	0.00705541	0.00409593	0.0049973	0.00565715	0.00613952	0.00674176	0.00810992	0.0125866	0.010708	0.0161312
1.04	0.0530205	0.0280164	0.0149417	0.00370564	-0.0185507	-0.0264665	-0.0473752	-0.0636448	-0.0683368	-0.0794997	-0.0873409	0.00967944	0.00715269	0.00405001	0.00517965	0.00566593	0.00576748	0.00673314	0.00831415	0.0125531	0.0108395	0.0161668
1.041	0.0516197	0.0276428	0.0140626	0.00363083	-0.0180591	-0.0257211	-0.0470597	-0.06244	-0.0673737	-0.0779316	-0.0851383	0.00972683	0.00723125	0.00399919	0.00530162	0.00564029	0.00541589	0.00672007	0.00850923	0.0124907	0.0109872	0.0161736
1.042	0.0502784	0.0271593	0.0131484	0.00359394	-0.0177279	-0.0250598	-0.0467134	-0.0612867	-0.0663419	-0.0764334	-0.0829195	0.00975252	0.00727054	0.00395132	0.00535369	0.00558107	0.00509595	0.00670287	0.00868565	0.012396	0.0111359	0.0161442
1.043	0.0490124	0.0265588	0.0122208	0.00359281	-0.0175606	-0.0244958	-0.0463423	-0.0602203	-0.0652573	-0.0750416	-0.0807394	0.0097571	0.00725805	0.00391485	0.00533237	0.00549627	0.0048204	0.00668753	0.0088372	0.0122734	0.011275	0.016078
1.044	0.0478217	0.0258426	0.0113015	0.00362391	-0.0175444	-0.0240313	-0.0459458	-0.0592558	-0.0641271	-0.073772	-0.0786379	0.00974085	0.00718857	0.00389886	0.00523998	0.00539513	0.00459837	0.0066771	0.00895867	0.0121257	0.0113934	0.0159733
1.045	0.0466906	0.0250168	0.0104063	0.00368246	-0.0176517	-0.0236587	-0.0455156	-0.0583882	-0.0629514	-0.072619	-0.0766366	0.00970621	0.00706337	0.00391081	0.0050845	0.00528906	0.00443641	0.00667532	0.0090466	0.0119578	0.0114814	0.0158316
1.046	0.045607	0.0241034	0.00955084	0.00376367	-0.0178455	-0.0233708	-0.0450518	-0.0576104	-0.0617407	-0.0715759	-0.0747618	0.00965173	0.00688666	0.00395168	0.00487873	0.00518853	0.00433475	0.0066797	0.00909355	0.0117711	0.0115254	0.0156489
1.047	0.0445534	0.023132	0.00874512	0.0038623	-0.0180812	-0.0231554	-0.0445532	-0.0569035	-0.0605068	-0.0706266	-0.07303	0.00957926	0.00666858	0.00401807	0.00463926	0.00510161	0.00429034	0.00668825	0.00909641	0.0115693	0.0115168	0.015427
1.048	0.0435125	0.0221399	0.007995	0.00397345	-0.0183102	-0.0229985	-0.0440204	-0.0562423	-0.0592649	-0.0697498	-0.0714513	0.00949124	0.00642236	0.00410169	0.00438498	0.00503194	0.00429598	0.00669764	0.00905449	0.0113554	0.0114498	0.0151698
1.049	0.0424691	0.0211687	0.0073026	0.00409308	-0.0184837	-0.022885	-0.043456	-0.0555983	-0.0580322	-0.0689222	-0.0700291	0.00939009	0.00616262	0.0041909	0.00413546	0.00497827	0.00434125	0.00670363	0.0089696	0.0111321	0.0113215	0.0148832
1.05	0.0414127	0.020261	0.00666692	0.00421831	-0.0185567	-0.0228	-0.0428645	-0.054942	-0.056827	-0.0681203	-0.0687602	0.00927786	0.0059039	0.00427308	0.00390938	0.00493564	0.00441399	0.00670185	0.00884624	0.0109016	0.0111326	0.0145744
1.051	0.0403382	0.0194573	0.00608455	0.00434774	-0.0184912	-0.0227294	-0.0422516	-0.0542457	-0.0556668	-0.067323	-0.0676352	0.00915606	0.00565954	0.00433683	0.00372277	0.00489765	0.00450195	0.00668864	0.00869162	0.0106663	0.0108871	0.0142517
1.052	0.0392351	0.0187857	0.00555016	0.00448125	-0.0182558	-0.0226542	-0.0416149	-0.0534759	-0.0545518	-0.0664992	-0.0666233	0.00902446	0.00544073	0.00437383	0.00358758	0.00485796	0.0045931	0.00665893	0.00851489	0.0104278	0.0105913	0.0139223
1.053	0.0381143	0.0182726	0.0050568	0.00461968	-0.0178344	-0.0225661	-0.040962	-0.0526151	-0.0534962	-0.0656372	-0.0657055	0.00888407	0.00525488	0.00437903	0.00350977	0.00481587	0.00467968	0.00661452	0.00832558	0.0101913	0.0102562	0.0135943
1.054	0.0370097	0.0179462	0.00460272	0.00476784	-0.0172305	-0.0224677	-0.0403165	-0.0516724	-0.0525313	-0.0647572	-0.0648878	0.00873663	0.00510969	0.00435173	0.00348999	0.00477301	0.00475525	0.00655505	0.00813915	0.00996574	0.00990038	0.0132798
1.055	0.0359383	0.0178088	0.00418145	0.00492953	-0.0164547	-0.0223532	-0.0396823	-0.0506421	-0.0516568	-0.0638555	-0.0641412	0.00858418	0.00500884	0.00429545	0.00352195	0.00473446	0.00481579	0.00648111	0.00796947	0.00975952	0.00954378	0.0129887
1.056	0.0349274	0.0178539	0.00379108	0.00511022	-0.0155308	-0.0222214	-0.0390664	-0.049532	-0.050871	-0.0629408	-0.0634432	0.00842523	0.00494901	0.00421469	0.00359456	0.00470596	0.0048594	0.00639063	0.0078236	0.00957713	0.00920085	0.0127217
1.057	0.0340014	0.0180611	0.00342963	0.00531503	-0.014493	-0.0220718	-0.0384708	-0.0483528	-0.0501633	-0.0620221	-0.0627672	0.00826094	0.00492437	0.00411599	0.00369306	0.00469234	0.00488626	0.00628235	0.00770796	0.0094232	0.00888804	0.0124808
1.058	0.0331828	0.0183997	0.00309634	0.00554848	-0.0133833	-0.0219059	-0.0378947	-0.0471198	-0.0495181	-0.0611107	-0.0620877	0.00809368	0.00492568	0.00400606	0.00380104	0.00469518	0.00489807	0.00615517	0.00762582	0.00929962	0.00861954	0.0122659
1.059	0.0324906	0.018831	0.00279178	0.00581393	-0.012249	-0.0217267	-0.0373345	-0.0458518	-0.0489162	-0.06022	-0.0613822	0.00792674	0.00494106	0.00389078	0.00390227	0.00471196	0.00489766	0.00600882	0.00757718	0.00920444	0.00840535	0.0120748
1.06	0.0319382	0.0193114	0.0025176	0.00611302	-0.0111392	-0.0215383	-0.0367845	-0.0445695	-0.0483363	-0.0593636	-0.0606332	0.00776429	0.00495751	0.00377472	0.00398237	0.00473687	0.00488859	0.00584507	0.00755952	0.00913196	0.00825038	0.0119034
1.061	0.0315319	0.0197958	0.00227606	0.00644519	-0.0101009	-0.0213458	-0.0362366	-0.0432935	-0.0477576	-0.0585538	-0.0598283	0.00761114	0.00496263	0.00366124	0.00403022	0.004763	0.00487476	0.00566877	0.00756887	0.00907368	0.00815441	0.0117463
1.062	0.0312648	0.0202373	0.00206949	0.00680699	-0.00917489	-0.0211517	-0.0356775	-0.042039	-0.047155	-0.0577949	-0.0589544	0.00747171	0.00494623	0.0035531	0.00403914	0.00478445	0.00485978	0.00548752	0.00760074	0.00901956	0.00811219	0.0115969
1.063	0.0311143	0.0205897	0.00189846	0.0071905	-0.00839159	-0.0209548	-0.035086	-0.0408104	-0.0464991	-0.0570787	-0.0579929	0.00734942	0.00490073	0.00345261	0.00400716	0.00479888	0.00484663	0.00531286	0.00764883	0.00895903	0.0081147	0.0114472
1.064	0.0310817	0.0208334	0.00176772	0.00758881	-0.00777949	-0.0207711	-0.034469	-0.0396367	-0.0458019	-0.0564336	-0.0569799	0.00725013	0.00482556	0.00336288	0.00393856	0.00480998	0.0048383	0.00515978	0.00771151	0.00888731	0.00815596	0.0112957
1.065	0.0311415	0.0209462	0.00167728	0.00799099	-0.00735098	-0.0206059	-0.0338187	-0.0385259	-0.0450588	-0.0558586	-0.0559281	0.00717846	0.00472566	0.00328755	0.00384212	0.00482423	0.00483669	0.00504125	0.0077882	0.00880239	0.0082292	0.0111418
1.066	0.0312637	0.0209164	0.00162788	0.00838382	-0.00710463	-0.0204621	-0.0331278	-0.0374806	-0.0442695	-0.0553479	-0.054853	0.00713191	0.00460643	0.00322711	0.0037304	0.00484924	0.0048425	0.00496367	0.00787167	0.00870177	0.00832132	0.0109788
1.067	0.0314103	0.0207406	0.00161796	0.00875213	-0.00702635	-0.0203398	-0.0323884	-0.0364949	-0.0434347	-0.0548871	-0.0537666	0.00710767	0.00447792	0.00318031	0.00361767	0.004891	0.00485542	0.00492685	0.00795555	0.0085873	0.00842176	0.0108042
1.068	0.0315412	0.0204244	0.00164483	0.00907974	-0.00709087	-0.0202371	-0.0315946	-0.0355579	-0.0425577	-0.0544563	-0.0526796	0.00710148	0.00435173	0.00314299	0.00351745	0.00495072	0.0048743	0.00492281	0.00803254	0.00846305	0.00852052	0.0106167
1.069	0.0316172	0.0199826	0.00170537	0.00935045	-0.0072638	-0.0201503	-0.0307433	-0.0346556	-0.041645	-0.0540334	-0.0516006	0.00710787	0.00423849	0.00310817	0.00343984	0.00502314	0.00489732	0.00493768	0.0080943	0.00833382	0.00860777	0.0104165
1.07	0.0316037	0.0194375	0.00179645	0.00954896	-0.00750444	-0.0200743	-0.0298351	-0.0337729	-0.0407049	-0.0535954	-0.0505361	0.00712103	0.00414567	0.00306753	0.00338976	0.00509692	0.00492229	0.00495558	0.00813209	0.00820416	0.00867431	0.010205
1.071	0.0314732	0.0188171	0.00191542	0.00966178	-0.00776882	-0.0200029	-0.0288744	-0.0328954	-0.0397471	-0.0531209	-0.0494897	0.00713573	0.00407625	0.00301358	0.00336673	0.00515684	0.0049467	0.00496274	0.00813783	0.00807758	0.00871218	0.0099849
1.072	0.0312074	0.0181529	0.00206039	0.00967814	-0.00801302	-0.0199291	-0.0278698	-0.032011	-0.0387812	-0.0525918	-0.0484617	0.00714815	0.0040285	0.00294232	0.00336642	0.00518703	0.00496773	0.00495069	0.00810508	0.0079563	0.00871544	0.00976006
1.073	0.0307813	0.0174668	0.0022262	0.00958923	-0.00819291	-0.0198385	-0.0268201	-0.0310991	-0.0377981	-0.0519726	-0.0474247	0.00715374	0.00399566	0.00285521	0.00338353	0.00517335	0.00498175	0.00491636	0.00802971	0.00784056	0.00867856	0.00953422
1.074	0.0302132	0.0167987	0.00241609	0.00939136	-0.00827728	-0.0197289	-0.0257487	-0.030164	-0.0368195	-0.0512721	-0.046389	0.00715543	0.00397344	0.00276159	0.00341335	0.00510816	0.00498443	0.0048666	0.00790966	0.00773107	0.00860377	0.00931363
1.075	0.0295275	0.0161824	0.00263305	0.00908695	-0.00824179	-0.0195998	-0.0246818	-0.0292175	-0.0358626	-0.0505015	-0.0453635	0.00715746	0.00395683	0.0026797	0.00345329	0.00498948	0.00497171	0.00481236	0.00775214	0.0076301	0.00849718	0.00910941
1.076	0.0287512	0.0156415	0.00287887	0.00868169	-0.00807117	-0.0194454	-0.0236385	-0.0282668	-0.0349321	-0.049668	-0.0443409	0.00716053	0.00394044	0.00263276	0.00350338	0.00482174	0.00493823	0.00476393	0.00756124	0.00753596	0.00836331	0.00892536
1.077	0.0279152	0.0151905	0.00315403	0.00818513	-0.00776051	-0.019259	-0.0226346	-0.0273203	-0.0340264	-0.0487797	-0.0433081	0.00716703	0.00392267	0.00264446	0.00356441	0.00461575	0.00487862	0.00473024	0.00734498	0.00744807	0.00821099	0.00876641
1.078	0.0270536	0.0148352	0.00345751	0.00761033	-0.00731589	-0.0190345	-0.021683	-0.0263882	-0.0331405	-0.0478471	-0.0422498	0.00717907	0.00390438	0.00273042	0.00363638	0.00438726	0.00478829	0.00471489	0.00711345	0.00736598	0.00805132	0.00863653
1.079	0.0262015	0.0145731	0.00378634	0.00697327	-0.006754	-0.0187668	-0.0207931	-0.0254817	-0.0322669	-0.0468829	-0.0411513	0.00719729	0.00388761	0.00289155	0.00371734	0.0041549	0.00466471	0.00471465	0.00687733	0.00728887	0.00789623	0.00853787
1.08	0.0253925	0.0143944	0.00413498	0.00629196	-0.00610084	-0.0184521	-0.0199697	-0.0246123	-0.0313972	-0.0459014	-0.0400004	0.00722056	0.00387431	0.00311433	0.00380321	0.00393746	0.00450877	0.00472052	0.0066469	0.00721537	0.00775746	0.00847076
1.081	0.0246551	0.0142827	0.00449489	0.00558542	-0.00538974	-0.0180884	-0.0192133	-0.0237898	-0.030523	-0.0449167	-0.0387884	0.00724598	0.00386529	0.00337693	0.00388866	0.00375092	0.00432621	0.00472082	0.00643131	0.00714361	0.00764546	0.00843408
1.082	0.0240111	0.0142167	0.00485433	0.00487267	-0.00465892	-0.0176752	-0.0185193	-0.023022	-0.0296375	-0.0439421	-0.0375117	0.00726937	0.00385967	0.00365624	0.00396872	0.00360583	0.00412864	0.00470517	0.00623815	0.00707151	0.00756839	0.00842573
1.083	0.023465	0.0141661	0.00519638	0.00417169	-0.00394756	-0.0172113	-0.0178729	-0.0223081	-0.0287293	-0.042979	-0.036161	0.00728516	0.0038548	0.00393217	0.0040405	0.00350596	0.00393386	0.0046682	0.00607383	0.00699723	0.00753051	0.00844333
1.084	0.0230132	0.0141015	0.00550085	0.00349824	-0.00329349	-0.0166942	-0.0172547	-0.021643	-0.027788	-0.0420251	-0.0347311	0.0072875	0.00384798	0.00418899	0.00410423	0.00344953	0.00376293	0.00461058	0.00594073	0.0069187	0.00753318	0.00848215
1.085	0.0226674	0.0140113	0.0057547	0.00286544	-0.00273692	-0.0161401	-0.016664	-0.0210393	-0.026837	-0.0411107	-0.0332668	0.00727721	0.0038369	0.00441738	0.00416333	0.00342861	0.00364149	0.00454162	0.00584602	0.00683909	0.00757603	0.00854165
1.086	0.0224133	0.0138755	0.00593934	0.00228357	-0.00230864	-0.0155583	-0.0160857	-0.0204922	-0.0258862	-0.0402419	-0.0317931	0.00725018	0.00381957	0.00461067	0.00422399	0.00343343	0.00358761	0.00447598	0.00579111	0.00675896	0.00765023	0.00861637
1.087	0.0222239	0.013675	0.00603579	0.00175899	-0.00202986	-0.0149563	-0.0155006	-0.0199895	-0.0249431	-0.0394142	-0.0303315	0.0072047	0.00379649	0.004765	0.00429313	0.0034539	0.00360682	0.00443169	0.00577645	0.00668063	0.00774409	0.00870042
1.088	0.0220636	0.0133944	0.006027	0.00129423	-0.00191156	-0.0143411	-0.0148894	-0.0195154	-0.0240155	-0.0386175	-0.0289033	0.00714092	0.00377055	0.00487817	0.00437607	0.00348002	0.00368877	0.00442556	0.00580069	0.00660712	0.00784344	0.0087869
1.089	0.0218929	0.0130243	0.00589973	0.000888273	-0.001954	-0.01372	-0.0142352	-0.0190528	-0.0231123	-0.0378386	-0.0275303	0.00706012	0.00374651	0.0049488	0.00447443	0.00350174	0.00380999	0.00446855	0.00585973	0.00654115	0.00793262	0.00886775
1.09	0.0216713	0.0125619	0.005646	0.000536961	-0.00214672	-0.0131001	-0.0135247	-0.0185847	-0.0222426	-0.0370622	-0.026233	0.00696445	0.0037302	0.00497606	0.00458511	0.00350873	0.00394089	0.00456305	0.00594645	0.00648435	0.00799603	0.00893429
1.091	0.021361	0.0120113	0.00526437	0.000233609	-0.00246931	-0.0124882	-0.0127503	-0.0180959	-0.0214152	-0.0362732	-0.0250297	0.00685661	0.00372736	0.00495999	0.00470087	0.00349064	0.00405281	0.00470321	0.00605107	0.00643683	0.00801977	0.00897805
1.092	0.0209303	0.0113834	0.00476078	-3.0252e-05	-0.00289273	-0.0118905	-0.0119108	-0.017575	-0.0206374	-0.0354579	-0.023936	0.00673957	0.0037423	0.00490233	0.00481197	0.00343793	0.00412262	0.00487795	0.00616195	0.00639713	0.00799301	0.00899179
1.093	0.020354	0.0106936	0.00414818	-0.000263927	-0.00338085	-0.0113117	-0.0110106	-0.0170139	-0.0199131	-0.0346028	-0.0229605	0.00661623	0.00377657	0.00480752	0.00490862	0.00334326	0.00413506	0.00507487	0.00626705	0.00636244	0.00790897	0.00897075
1.094	0.0196058	0.00995379	0.00344187	-0.000476279	-0.00389014	-0.010749	-0.0100522	-0.0163999	-0.0192302	-0.0336804	-0.0220879	0.00648813	0.00382761	0.00468279	0.00498325	0.00320362	0.00408335	0.00528306	0.00635416	0.00632831	0.0077648	0.0089126
1.095	0.018701	0.00920202	0.00267356	-0.000677259	-0.00438193	-0.0102125	-0.00906467	-0.0157502	-0.0186047	-0.0327079	-0.0213426	0.00636027	0.00389228	0.00454132	0.00503104	0.00302053	0.00396987	0.00549375	0.00641284	0.00629476	0.00756618	0.0088178
1.096	0.0176605	0.00847185	0.00187936	-0.000874589	-0.00481885	-0.00971172	-0.00807985	-0.0150833	-0.0180461	-0.0317021	-0.0207382	0.00623447	0.00396336	0.00440028	0.00505238	0.00280251	0.00380461	0.00570167	0.00643742	0.00625918	0.00732043	0.0086909
1.097	0.0165062	0.00779075	0.00109429	-0.00107409	-0.00516379	-0.00924834	-0.0071247	-0.0144128	-0.0175489	-0.0306686	-0.0202673	0.00611188	0.00403227	0.00427818	0.00505171	0.00256712	0.00360447	0.00590208	0.00642407	0.00622033	0.00703871	0.00853785
1.098	0.0152674	0.00718343	0.0003532	-0.00127945	-0.00538487	-0.00882213	-0.00622619	-0.0137537	-0.0171032	-0.0296138	-0.0199153	0.00599359	0.00409025	0.00419226	0.0050365	0.00234161	0.00339165	0.00608952	0.00637261	0.00617873	0.00673509	0.00836675
1.099	0.0139791	0.00667082	-0.000311472	-0.00149206	-0.00545798	-0.00843152	-0.00541005	-0.013122	-0.0166965	-0.0285457	-0.0196633	0.00588021	0.00412935	0.00415402	0.00501549	0.00216174	0.00319112	0.00625688	0.00628617	0.006136	0.00642468	0.00818652
1.1	0.0126802	0.00626887	-0.000872175	-0.00171114	-0.00536845	-0.00807399	-0.00469892	-0.0125334	-0.0163154	-0.0274734	-0.0194897	0.00577201	0.00414335	0.00416572	0.00499661	0.00206476	0.00302676	0.00639526	0.00617073	0.00609438	0.00612207	0.0080059
1.101	0.01141	0.00598762	-0.00130843	-0.00193395	-0.005112	-0.00774641	-0.00411071	-0.0120018	-0.0159464	-0.026406	-0.019372	0.0056692	0.00412842	0.00421929	0.00498511	0.00207401	0.00291647	0.00649468	0.00603436	0.00605621	0.00584015	0.00783262
1.102	0.0102054	0.00583065	-0.0016086	-0.00215619	-0.00469507	-0.00744534	-0.00365716	-0.011538	-0.0155777	-0.0253519	-0.019288	0.00557221	0.00408344	0.00429872	0.00498243	0.00218512	0.00286784	0.00654555	0.00588635	0.00602339	0.00558948	0.0076728
1.103	0.00909857	0.00579483	-0.001771	-0.00237247	-0.00413444	-0.00716736	-0.00334289	-0.0111489	-0.0151999	-0.0243185	-0.0192176	0.00548191	0.00401006	0.00438435	0.00498624	0.0023695	0.00287682	0.00654031	0.00573611	0.00599707	0.00537825	0.00753046
1.104	0.00810388	0.00586212	-0.00180716	-0.0025751	-0.00345246	-0.00690389	-0.00315692	-0.0108281	-0.0147976	-0.0232978	-0.019128	0.00539982	0.0039116	0.00445757	0.00499163	0.002591	0.00293059	0.00647542	0.0055939	0.00597669	0.00521311	0.00740787
1.105	0.00723816	0.0060166	-0.00173736	-0.00275865	-0.0026811	-0.00664882	-0.00308822	-0.0105706	-0.0143642	-0.022289	-0.0190038	0.00532612	0.00379451	0.00450239	0.00499275	0.00281919	0.00301351	0.00634945	0.00546196	0.00596238	0.00509682	0.00730229
1.106	0.00652566	0.00625265	-0.00158177	-0.00291909	-0.00186703	-0.00641194	-0.00313447	-0.010387	-0.0139257	-0.0213214	-0.0188679	0.00526406	0.00366603	0.00450952	0.00498368	0.0030328	0.00311063	0.00616818	0.00534741	0.00595329	0.00503563	0.00721274
1.107	0.00596214	0.00654578	-0.00137398	-0.00305199	-0.00105242	-0.00619157	-0.003272	-0.0102651	-0.0134878	-0.0203929	-0.0187159	0.00521383	0.00353285	0.00447502	0.00496166	0.00321928	0.00320959	0.00594091	0.00525184	0.00594679	0.00503034	0.0071332
1.108	0.00553187	0.00686769	-0.00115208	-0.00315409	-0.00027862	-0.00598505	-0.00347105	-0.0101872	-0.0130565	-0.0194968	-0.0185439	0.00517442	0.0034005	0.00440016	0.00492732	0.00337258	0.00330158	0.00567927	0.00517457	0.00594027	0.00507865	0.00705597
1.109	0.00521028	0.0071886	-0.000955248	-0.00322349	0.000416036	-0.00578935	-0.0036987	-0.0101332	-0.0126393	-0.0186237	-0.0183501	0.00514281	0.00327282	0.00429028	0.00488493	0.00349134	0.00337995	0.0053956	0.0051132	0.00593081	0.0051736	0.00697176
1.11	0.00496635	0.00747904	-0.000820456	-0.00325974	0.000998662	-0.00560107	-0.00392135	-0.010082	-0.0122442	-0.017763	-0.0181339	0.00511414	0.00315206	0.00415341	0.00484206	0.00357723	0.00343915	0.00510085	0.00506439	0.00591535	0.00530332	0.00687065
1.111	0.00476552	0.00771171	-0.000779242	-0.00326376	0.00144395	-0.00541645	-0.00410721	-0.0100136	-0.0118791	-0.0169042	-0.0178959	0.00508218	0.00303991	0.00399893	0.00480861	0.00363393	0.0034744	0.00480269	0.00502458	0.00589089	0.00545217	0.0067432
1.112	0.00457274	0.00786309	-0.000854863	-0.00323776	0.00173582	-0.0052314	-0.00422866	-0.00991089	-0.0115509	-0.0160384	-0.0176371	0.00504036	0.00293897	0.00383644	0.00479546	0.00366646	0.00348194	0.00450462	0.00499038	0.00585474	0.0056026	0.00658174
1.113	0.00435546	0.00791484	-0.00106009	-0.00318498	0.00186842	-0.00504162	-0.00426425	-0.00976116	-0.0112651	-0.0151593	-0.0173585	0.00498285	0.00285442	0.00367501	0.00481265	0.00368085	0.00346001	0.00420628	0.00495858	0.00580489	0.00573744	0.00638148
1.114	0.00408212	0.00785162	-0.00139711	-0.00310905	0.0018488	-0.00484043	-0.00419665	-0.0095537	-0.0110203	-0.0142584	-0.0170544	0.00490586	0.00279473	0.00352298	0.00486788	0.00368459	0.00340958	0.00390513	0.00492667	0.00573999	0.00584248	0.00614126
1.115	0.00372264	0.00766001	-0.00185825	-0.00301353	0.0016971	-0.0046169	-0.00401095	-0.00927662	-0.0108041	-0.0133203	-0.0167065	0.00480722	0.00277131	0.00338636	0.00496468	0.00368511	0.00333579	0.00359788	0.0048896	0.00566017	0.0059052	0.00586325
1.116	0.00328409	0.00735441	-0.0024147	-0.0029047	0.00142903	-0.0043776	-0.00372703	-0.00895369	-0.0106349	-0.0123775	-0.0163445	0.00468888	0.00279653	0.00327081	0.00510027	0.00368928	0.00325001	0.00328534	0.00484183	0.00556751	0.00591927	0.00555565
1.117	0.00276885	0.0069464	-0.00303214	-0.00278787	0.00107412	-0.00412248	-0.00336126	-0.00860117	-0.0105132	-0.0114463	-0.0159749	0.00455596	0.00287802	0.00318109	0.00526765	0.00370366	0.00316686	0.00297345	0.00477813	0.00546441	0.00588391	0.00522938
1.118	0.00218256	0.00644929	-0.00367109	-0.00266805	0.00066933	-0.00384914	-0.0029319	-0.00823348	-0.0104294	-0.0105366	-0.0155934	0.00441531	0.00301557	0.00311964	0.00545578	0.00373187	0.00310252	0.00267462	0.00469142	0.0053539	0.00580159	0.00489648
1.119	0.00153837	0.00588065	-0.00428835	-0.00255001	0.000254575	-0.00355619	-0.00246217	-0.00786731	-0.0103708	-0.00965888	-0.0151937	0.00427498	0.00320051	0.0030869	0.0056507	0.00377348	0.0030709	0.00240867	0.00457437	0.00523925	0.00567824	0.00456883
1.12	0.000855833	0.00526123	-0.00484057	-0.00243824	-0.000130196	-0.00324378	-0.0019785	-0.00752023	-0.0103225	-0.00882328	-0.014769	0.00414287	0.00341789	0.00308172	0.005837	0.0038235	0.0030791	0.00220126	0.00442045	0.00512347	0.00552216	0.00425621
1.121	0.000159301	0.00461368	-0.0052879	-0.00233683	-0.000447881	-0.00291396	-0.00150857	-0.00720911	-0.0102692	-0.00803883	-0.0143125	0.00402528	0.00365017	0.00310252	0.00599915	0.00387301	0.00312436	0.00207815	0.00422536	0.00500882	0.00534303	0.00396496
1.122	-0.000524027	0.00396113	-0.00559747	-0.00224953	-0.000666923	-0.00257099	-0.00107931	-0.00694865	-0.0101961	-0.00731267	-0.013819	0.00392575	0.00388057	0.00314874	0.00612277	0.00391068	0.00319455	0.00205484	0.00398851	0.00489652	0.00515103	0.00369774
1.123	-0.00116622	0.00332593	-0.00574636	-0.00217963	-0.000763601	-0.00222139	-0.000714936	-0.00674994	-0.0100905	-0.00664933	-0.0132857	0.0038447	0.00409525	0.00322209	0.00619567	0.00392496	0.0032718	0.00212803	0.00371461	0.0047867	0.00495638	0.00345483
1.124	-0.00174073	0.00272831	-0.00572382	-0.00212995	-0.000723767	-0.00187378	-0.000435208	-0.00661935	-0.00994273	-0.00605017	-0.0127124	0.00377971	0.00428451	0.00332685	0.00620874	0.0039062	0.00333735	0.00227809	0.00341527	0.00467856	0.00476919	0.00323682
1.125	-0.00223723	0.00217562	-0.00553569	-0.00210309	-0.000537045	-0.00153038	-0.000242738	-0.00654331	-0.00973117	-0.005493	-0.0120812	0.00372772	0.00444413	0.00346874	0.00615745	0.00384863	0.0033767	0.00248147	0.00311168	0.00457159	0.00459988	0.00304744
1.126	-0.00262718	0.00168699	-0.00519575	-0.00210086	-0.000216633	-0.00120764	-0.000153296	-0.00652705	-0.00946631	-0.00498691	-0.0114138	0.00368072	0.00457147	0.00365171	0.00603995	0.003751	0.00337868	0.00271519	0.00283089	0.00446213	0.00445685	0.00289683
1.127	-0.00288768	0.0012795	-0.00472947	-0.00212319	0.000216031	-0.000924948	-0.000176285	-0.00657188	-0.00916465	-0.0045399	-0.0107383	0.00363762	0.00466811	0.00387713	0.00585996	0.00361807	0.00334217	0.00296314	0.00261204	0.00435028	0.00435188	0.00279975
1.128	-0.00301465	0.000956738	-0.00417609	-0.00216989	0.000734133	-0.000693497	-0.000304225	-0.00666127	-0.00883248	-0.00413988	-0.010065	0.00359628	0.00473767	0.00414057	0.00562581	0.00346057	0.00327264	0.00321343	0.00249222	0.00423465	0.00429336	0.00277119
1.129	-0.00301192	0.000717128	-0.00358243	-0.00223962	0.00130394	-0.00052247	-0.000522669	-0.00677376	-0.0084787	-0.00377195	-0.00940396	0.00355599	0.00478439	0.00443179	0.00535049	0.00329476	0.00318279	0.00345578	0.00249238	0.00411418	0.00428613	0.00281931
1.13	-0.00289048	0.0005545	-0.00299914	-0.00232975	0.00188716	-0.000418195	-0.000811597	-0.00688461	-0.00811423	-0.00341981	-0.0087648	0.00351704	0.00481202	0.00473611	0.0050513	0.00314105	0.00309085	0.00367975	0.00260421	0.0039881	0.00432973	0.00293913
1.131	-0.00266714	0.000458908	-0.0024765	-0.0024362	0.00244365	-0.00038343	-0.0011472	-0.00696778	-0.0077514	-0.00306738	-0.00815585	0.00348001	0.00482304	0.00503663	0.00474919	0.00302126	0.00301755	0.00387409	0.00279445	0.00385587	0.00441751	0.0031122
1.132	-0.0023629	0.000417655	-0.00206022	-0.00255342	0.00293427	-0.000416848	-0.00150387	-0.00699799	-0.007403	-0.00270041	-0.00758384	0.00344495	0.00481843	0.00531675	0.00446757	0.0029542	0.00298145	0.00402718	0.00302185	0.00371707	0.00453739	0.00331202
1.133	-0.00200112	0.000416405	-0.00178763	-0.00267446	0.00332364	-0.00051278	-0.00185626	-0.00695277	-0.00708145	-0.00230786	-0.00705341	0.00341096	0.00479802	0.00556235	0.00423006	0.00295072	0.00299366	0.00412811	0.0032505	0.00357134	0.00467376	0.0035108
1.134	-0.0016056	0.000440324	-0.00168439	-0.00279111	0.00358268	-0.000661277	-0.00218118	-0.00681422	-0.00679778	-0.001883	-0.00656686	0.00337597	0.00476125	0.00576337	0.00405707	0.00301054	0.00305448	0.00416815	0.00345439	0.00341838	0.00480995	0.00368448
1.135	-0.00120425	0.000472459	-0.00176327	-0.00289541	0.00369405	-0.000845853	-0.00245537	-0.00656373	-0.00655356	-0.00141473	-0.0061162	0.00333767	0.00470879	0.00591484	0.0039618	0.00312229	0.00315492	0.00414262	0.00361533	0.00325879	0.00492947	0.00381696
1.136	-0.000821541	0.000496147	-0.0020236	-0.00297863	0.00364786	-0.0010455	-0.00266035	-0.0061898	-0.00634934	-0.000898916	-0.00568912	0.00329005	0.00464065	0.00601546	0.00394597	0.00326916	0.00327743	0.00405141	0.00372851	0.00309147	0.00502019	0.00389512
1.137	-0.000457095	0.000509707	-0.00244246	-0.00302897	0.00343737	-0.00125047	-0.00279996	-0.00571378	-0.0062062	-0.000368251	-0.00530663	0.00323163	0.00455863	0.00607026	0.0040001	0.00343379	0.00340301	0.00389864	0.00378921	0.00291731	0.00507312	0.00391748
1.138	-0.000120627	0.000506164	-0.00298778	-0.00303709	0.00307236	-0.00144178	-0.00287266	-0.00514712	-0.00612368	0.000162644	-0.00496414	0.00315976	0.00446628	0.00608709	0.00410661	0.0035996	0.00351507	0.00369522	0.00379725	0.0027372	0.00508233	0.00388995
1.139	0.000180737	0.000480199	-0.0036174	-0.00299508	0.00257315	-0.00159972	-0.00288083	-0.00450513	-0.00609459	0.00067962	-0.00465188	0.00307209	0.00436764	0.00607526	0.00424452	0.00375301	0.00360088	0.00345793	0.00375509	0.0025524	0.00504553	0.00382499
1.14	0.00044412	0.000429206	-0.00428183	-0.00289697	0.0019686	-0.00170647	-0.00283151	-0.00380792	-0.00610715	0.00116788	-0.00435864	0.00296725	0.0042663	0.00604409	0.00439377	0.00388377	0.00365216	0.0032087	0.0036662	0.00236499	0.00496348	0.00374068
1.141	0.000670648	0.000353225	-0.00492827	-0.00273921	0.00129392	-0.00174768	-0.00273551	-0.00307916	-0.00614581	0.00161325	-0.004073	0.00284503	0.00416458	0.0060016	0.00453767	0.00398495	0.00366504	0.00297302	0.00353441	0.00217831	0.00483951	0.00365861
1.142	0.000864905	0.000254685	-0.00550497	-0.00252114	0.000588157	-0.00171389	-0.00260637	-0.00234461	-0.00619236	0.0020034	-0.00378454	0.00270679	0.00406291	0.00595394	0.00466401	0.00405294	0.00363964	0.00277698	0.00336411	0.00199775	0.00467894	0.00360075
1.143	0.00103415	0.000137992	-0.00596543	-0.00224523	-0.000108671	-0.00160162	-0.00245904	-0.00163049	-0.0062271	0.00232902	-0.00348502	0.00255577	0.00396003	0.00590574	0.00476512	0.00408757	0.00357978	0.00264232	0.00316099	0.00183186	0.00448878	0.00358538
1.144	0.00118735	9.0008e-06	-0.00627229	-0.00191711	-0.000758356	-0.00141395	-0.00230864	-0.000961804	-0.0062302	0.00258478	-0.00316919	0.00239776	0.00385359	0.00586087	0.00483766	0.00409232	0.00349274	0.00258051	0.00293361	0.0016933	0.00427755	0.00362324
1.145	0.00133309	-0.000125458	-0.00640054	-0.00154577	-0.00132682	-0.00116037	-0.00216806	-0.000359166	-0.00618122	0.00277188	-0.0028346	0.00224177	0.00374126	0.00582354	0.00488185	0.00407418	0.00338917	0.00258899	0.00269497	0.00159846	0.00405517	0.00371589
1.146	0.00147372	-0.00026328	-0.00634238	-0.00114355	-0.00178413	-0.000852682	-0.00204233	0.000171218	-0.00605276	0.00290824	-0.00246725	0.00210002	0.00362125	0.0057983	0.00490031	0.0040433	0.00328317	0.00265335	0.00246535	0.00156333	0.00383281	0.00385679
1.147	0.00162644	-0.000394673	-0.00610016	-0.000721934	-0.00211525	-0.000515817	-0.00194904	0.00060493	-0.00584665	0.0029869	-0.0020896	0.00198852	0.0034945	0.00578879	0.00489951	0.00401401	0.00319084	0.00275446	0.0022733	0.00159967	0.00362634	0.00402881
1.148	0.00180234	-0.000509681	-0.00569046	-0.000294792	-0.00231224	-0.000177563	-0.00189792	0.000927048	-0.00556	0.00301235	-0.00172012	0.00192289	0.00336526	0.00579873	0.00488617	0.00399953	0.00312805	0.00287324	0.00214913	0.00170498	0.00345085	0.00421642
1.149	0.00200447	-0.000604277	-0.00514554	0.000123547	-0.00237518	0.000136163	-0.00189009	0.00113732	-0.00518825	0.00300114	-0.00136941	0.00191399	0.003239	0.00582755	0.0048667	0.00401113	0.00310934	0.00299509	0.00211904	0.00186431	0.00332178	0.00440354
1.15	0.00223268	-0.000676368	-0.00450825	0.000519546	-0.00231323	0.000400255	-0.00192272	0.00124223	-0.00473124	0.00297239	-0.00104861	0.0019632	0.00312234	0.00586945	0.004846	0.00405536	0.00314403	0.00311023	0.00219041	0.00205687	0.00325185	0.00457608
1.151	0.00248384	-0.000725864	-0.00382843	0.000881453	-0.00214363	0.00059256	-0.00198975	0.00125425	-0.00419349	0.00294595	-0.000768531	0.00206128	0.00302185	0.00591304	0.00482652	0.00413236	0.00323388	0.00321324	0.0023472	0.00226214	0.00324775	0.00472265
1.152	0.00275238	-0.000754602	-0.00315873	0.0012002	-0.00189012	0.000695897	-0.0020828	0.00119071	-0.00358419	0.00294047	-0.00053889	0.00219181	0.00294277	0.00594267	0.00480778	0.00423591	0.00337279	0.00330226	0.00255981	0.00246292	0.00330787	0.00483484
1.153	0.00303087	-0.000766144	-0.00255022	0.0014701	-0.00158091	0.000699789	-0.00219226	0.00107244	-0.00291687	0.00297161	-0.000367511	0.00233644	0.00288831	0.00594099	0.00478665	0.00435512	0.00354898	0.0033786	0.00279846	0.0026461	0.00342265	0.00490737
1.154	0.00331084	-0.000765482	-0.00204815	0.00168939	-0.00124637	0.000601722	-0.00230838	0.000922227	-0.00220885	0.00305041	-0.000259676	0.00247869	0.00285957	0.00589209	0.00475807	0.00447688	0.00374806	0.00344647	0.0030406	0.00280277	0.00357726	0.00493832
1.155	0.00358336	-0.000758308	-0.00168801	0.00185996	-0.000916686	0.000408038	-0.00242147	0.000763511	-0.00148026	0.00318266	-0.00021814	0.00260578	0.0028562	0.00578475	0.00471616	0.00458825	0.00395581	0.00351265	0.00327223	0.00292807	0.00375494	0.00492923
1.156	0.0038357	-0.00075305	-0.00149434	0.0019875	-0.000617045	0.000134612	-0.00251911	0.0006234	-0.000746211	0.00337595	-0.000232393	0.00270797	0.00287742	0.00561499	0.00465487	0.00467802	0.00415957	0.00358521	0.0034878	0.00301976	0.00394022	0.00488666
1.157	0.00406013	-0.000759296	-0.00147621	0.00208306	-0.0003717	-0.00019484	-0.00259898	0.00052618	-2.95641e-05	0.00362188	-0.000296895	0.00278238	0.00292143	0.00538657	0.00457014	0.00473889	0.00434936	0.00367487	0.00368388	0.00308182	0.00412066	0.00481597
1.158	0.00425967	-0.000777911	-0.00162623	0.00215909	-0.000200593	-0.000555566	-0.00266703	0.000472679	0.000635247	0.0038908	-0.000421325	0.00282575	0.00298743	0.0051124	0.00445956	0.00476482	0.00451811	0.00378981	0.00386281	0.00311879	0.0042863	0.00472872
1.159	0.00442949	-0.000815262	-0.00192431	0.00222952	-0.000112872	-0.000913165	-0.0027233	0.000475049	0.00122899	0.00416433	-0.000595105	0.00283846	0.00307312	0.00481376	0.00432247	0.00475278	0.00466094	0.00393442	0.0040269	0.00313734	0.00443024	0.00463696
1.16	0.00456595	-0.000877064	-0.00233796	0.0023087	-0.000109569	-0.00123081	-0.00276963	0.000541407	0.00173645	0.00442152	-0.000804818	0.00282222	0.00317408	0.0045177	0.00415993	0.00470178	0.00477477	0.00410739	0.00417772	0.00314488	0.00454811	0.00455253
1.161	0.00466659	-0.000968011	-0.00282496	0.00241011	-0.000183786	-0.00147209	-0.00280928	0.000675552	0.0021473	0.00464053	-0.00103529	0.00277911	0.00328317	0.0042527	0.00397441	0.00461248	0.00485803	0.00430132	0.00431563	0.00314841	0.00463759	0.00448543
1.162	0.00473013	-0.00109147	-0.00333694	0.00254517	-0.000321487	-0.001604	-0.0028464	0.000877002	0.00245661	0.00480039	-0.0012708	0.00271082	0.00339046	0.00404214	0.0037695	0.00448701	0.00491028	0.00450388	0.00444043	0.00315355	0.00469801	0.00444262
1.163	0.00475625	-0.00124924	-0.00382329	0.00272205	-0.000502819	-0.00159968	-0.00288542	0.00114131	0.00266514	0.00488279	-0.00149637	0.00261819	0.00348407	0.00389752	0.0035496	0.00432923	0.0049321	0.00469989	0.00455281	0.00316394	0.00473007	0.00442759
1.164	0.00474544	-0.0014414	-0.00423526	0.00294482	-0.000703838	-0.00144085	-0.0029304	0.00146062	0.00277921	0.00487372	-0.00169888	0.00250124	0.00355149	0.00381461	0.00331996	0.00414519	0.004925	0.00487369	0.00465602	0.00318119	0.0047356	0.0044408
1.165	0.00469898	-0.00166606	-0.00452974	0.00321253	-0.000898701	-0.0011191	-0.00298373	0.00182429	0.00281038	0.00476563	-0.00186798	0.00235966	0.00358099	0.00377566	0.0030868	0.00394393	0.00489147	0.00501134	0.00475707	0.00320529	0.00471712	0.00448076
1.166	0.00461629	-0.00192062	-0.00467354	0.00351963	-0.00106037	-0.000638057	-0.003045	0.00222217	0.00277657	0.00455995	-0.00199314	0.00219348	0.00356304	0.00375645	0.00285779	0.00373824	0.00483449	0.00510152	0.00486705	0.00323437	0.00467823	0.00454535
1.167	0.00449464	-0.00220251	-0.00464437	0.00385629	-0.0011647	-1.17834e-05	-0.0031108	0.00264832	0.00270211	0.00426785	-0.0020642	0.00200476	0.00349113	0.00373426	0.00264206	0.00354463	0.00475697	0.00513638	0.0049974	0.00326702	0.00462352	0.00463223
1.168	0.00434262	-0.00250119	-0.00443138	0.00420855	-0.00119384	0.000731375	-0.0031869	0.00308116	0.002599	0.0038881	-0.00209708	0.00179972	0.00336373	0.0036939	0.00245002	0.00338205	0.00466297	0.00511415	0.00515898	0.00330254	0.00455656	0.00473882
1.169	0.00416374	-0.00280765	-0.00403887	0.00455804	-0.00113291	0.00155515	-0.00327118	0.00350574	0.00248682	0.00343511	-0.00210108	0.00159025	0.00318363	0.00362971	0.00229258	0.00326872	0.00455585	0.00503663	0.00535862	0.00333849	0.00448042	0.00486175
1.17	0.00395908	-0.00311395	-0.00348388	0.0048842	-0.000973294	0.00241802	-0.00335761	0.00391326	0.00238804	0.00293222	-0.00208436	0.00139726	0.0029581	0.00354423	0.00217872	0.00321739	0.00443754	0.00490891	0.00559428	0.00337225	0.00439777	0.00499564
1.171	0.00372946	-0.00341204	-0.00279472	0.00516572	-0.000713221	0.00327464	-0.00343864	0.00429794	0.0023235	0.00240651	-0.00205693	0.00125321	0.0026991	0.00344544	0.00211237	0.00323052	0.0043087	0.004739	0.005855	0.00340077	0.00431055	0.0051327
1.172	0.00347577	-0.00369418	-0.00200845	0.00538212	-0.000357846	0.00407893	-0.00350587	0.00465721	0.00231083	0.00188665	-0.00202979	0.00119736	0.00242325	0.00334288	0.0020902	0.00329854	0.00416884	0.00453704	0.0061227	0.00342064	0.00422013	0.00526273
1.173	0.00319921	-0.00395323	-0.00116773	0.00551534	8.11903e-05	0.00478734	-0.00355082	0.00499158	0.0023631	0.00140065	-0.00201396	0.00125433	0.0021517	0.00324385	0.00210204	0.00340262	0.00401687	0.00431466	0.00637547	0.00342864	0.0041278	0.00537385
1.174	0.00290149	-0.00418302	-0.000317332	0.00555123	0.000586651	0.00536186	-0.00356564	0.00530439	0.00248777	0.000973627	-0.00201956	0.00141359	0.00190958	0.00315097	0.00213405	0.00351998	0.00385201	0.00408442	0.0065914	0.00342249	0.00403539	0.00545365
1.175	0.00258523	-0.00437864	0.00049965	0.0054801	0.00113708	0.00577339	-0.00354342	0.00560092	0.00268601	0.000626769	-0.00205443	0.00164119	0.00172368	0.00306205	0.00217284	0.00362894	0.00367492	0.0038595	0.00675193	0.00340169	0.00394565	0.00549068
1.176	0.00225359	-0.00453667	0.00124463	0.00529908	0.0017081	0.00600226	-0.00347943	0.00588858	0.00295255	0.000373847	-0.00212413	0.00190355	0.00161585	0.00297213	0.00220838	0.00371227	0.00348823	0.00365303	0.00684412	0.00336836	0.00386244	0.00547576
1.177	0.00190347	-0.00465885	0.00188444	0.00501106	0.00227624	0.00604112	-0.00336565	0.00617952	0.00328175	0.000230159	-0.00222186	0.00217576	0.00159175	0.00287672	0.00223516	0.00375891	0.00329659	0.00347686	0.00686224	0.00332794	0.00378912	0.00540403
1.178	0.0015438	-0.00474086	0.00239981	0.00462663	0.002814	0.00589262	-0.00320664	0.00648061	0.00365391	0.000186952	-0.00235305	0.0024438	0.001641	0.00277638	0.00225448	0.0037628	0.0031075	0.00334025	0.006807	0.00328971	0.00373155	0.0052713
1.179	0.00118487	-0.00478263	0.00278036	0.00416184	0.00329896	0.00557011	-0.00300741	0.00679239	0.00404219	0.000228571	-0.00251978	0.00269657	0.00173858	0.00267803	0.0022714	0.00372525	0.00292992	0.00324882	0.00668765	0.00326306	0.00369045	0.00508096
1.18	0.000831117	-0.00478754	0.0030268	0.00363653	0.0037126	0.00509962	-0.00277082	0.0071206	0.00442421	0.00034088	-0.0027125	0.00292734	0.00185986	0.00259394	0.00229394	0.00365219	0.00277096	0.0032007	0.00651861	0.00325875	0.00366378	0.00483918
1.181	0.000486071	-0.00476051	0.00315034	0.00307378	0.00404128	0.00451541	-0.00250059	0.00746904	0.0047775	0.000505512	-0.00291783	0.00313164	0.00198687	0.00253808	0.00233044	0.00355379	0.00263378	0.00318682	0.00631823	0.00328563	0.0036455	0.00455563
1.182	0.000152006	-0.00470759	0.00317119	0.0024983	0.00427693	0.00385711	-0.00220077	0.00783894	0.00508126	0.000701543	-0.0031195	0.00330639	0.00210897	0.00251985	0.00238686	0.00344343	0.00251571	0.00319255	0.0061065	0.00334834	0.00362631	0.00424288
1.183	-0.000170331	-0.00463554	0.00311635	0.00193469	0.00441725	0.00316659	-0.00187531	0.00822848	0.00531802	0.000907374	-0.0032995	0.00344955	0.00222106	0.00253827	0.00246496	0.00333632	0.00240814	0.00320085	0.00590282	0.00344609	0.00359542	0.00391559
1.184	-0.000481906	-0.00455121	0.00301703	0.0014057	0.00446554	0.00248461	-0.0015276	0.00863257	0.00547515	0.00110265	-0.00343944	0.00356005	0.00232142	0.00258043	0.00256181	0.00324784	0.00229856	0.00319596	0.00572418	0.00357305	0.00354278	0.00358978
1.185	-0.000785214	-0.00446117	0.00290599	0.000930644	0.00443005	0.00184816	-0.00115978	0.00904235	0.0055461	0.00127074	-0.00352139	0.00363792	0.00241011	0.00262543	0.002671	0.00319161	0.0021742	0.00316657	0.00558429	0.00372007	0.00346148	0.00328216
1.186	-0.00108482	-0.00437086	0.00281408	0.000523967	0.00432312	0.00128682	-0.000773337	0.0094466	0.00553085	0.00139874	-0.00353031	0.0036847	0.00248765	0.00265119	0.0027846	0.00317724	0.0020258	0.00310834	0.00549318	0.00387708	0.00334954	0.00300887
1.187	-0.00138911	-0.00428631	0.00276638	0.000193686	0.00416094	0.000821175	-0.000367939	0.00983332	0.00543768	0.00148265	-0.00345203	0.00370283	0.002554	0.00264057	0.00289497	0.00320903	0.00185124	0.00302538	0.00545786	0.00403544	0.00321101	0.00278396
1.188	-0.00170813	-0.00421025	0.00278189	-5.75829e-05	0.00395896	0.000461892	5.81799e-05	0.010188	0.00528306	0.00152444	-0.00327697	0.00369911	0.00260995	0.00258776	0.0029961	0.00328402	0.00165956	0.00293138	0.00548252	0.00418784	0.003059	0.00261727
1.189	-0.00204186	-0.00413988	0.0028755	-0.000233184	0.00373318	0.000206212	0.000502427	0.0104907	0.00507959	0.00151928	-0.00301144	0.00367988	0.00265532	0.00249877	0.00308489	0.00339465	0.00147554	0.00284896	0.0055676	0.00432956	0.00290992	0.00251367
1.19	-0.00239606	-0.00407364	0.00305121	-0.000343074	0.0034989	4.39051e-05	0.000965737	0.0107263	0.00485001	0.00147703	-0.00265947	0.00365263	0.0026897	0.00239494	0.00316008	0.00352958	0.00134243	0.00280595	0.00570947	0.00445918	0.00278512	0.00247039
1.191	-0.00277671	-0.00400851	0.00330384	-0.000402199	0.00326876	-4.33701e-05	0.00144928	0.0108822	0.00462091	0.00141374	-0.00222886	0.00362498	0.00271283	0.00231198	0.00322192	0.00367565	0.00131435	0.00282775	0.00589908	0.00457741	0.00270558	0.00247845
1.192	-0.00318824	-0.00394001	0.00361997	-0.000429118	0.00305182	-8.03825e-05	0.00195331	0.0109488	0.00441965	0.00134887	-0.00173181	0.00360309	0.00272457	0.00229205	0.00327143	0.00381973	0.00142265	0.00292778	0.00612152	0.00468642	0.00268503	0.00252583
1.193	-0.0036328	-0.00386252	0.00397922	-0.000444366	0.00285291	-9.58377e-05	0.00247647	0.0109203	0.00427204	0.00130333	-0.00118428	0.00359026	0.00272496	0.00236663	0.00330958	0.00395002	0.00164888	0.00310195	0.00635703	0.00478913	0.00272453	0.00260099
1.194	-0.00410965	-0.00376963	0.00435607	-0.000468663	0.00267227	-0.000119606	0.00301529	0.0107952	0.00420012	0.00129732	-0.000605039	0.00358604	0.00271406	0.00253887	0.00333688	0.00405696	0.00194725	0.00333139	0.00658294	0.00488883	0.00281228	0.00269539
1.195	-0.00461476	-0.00365476	0.00472225	-0.000521229	0.00250589	-0.000179603	0.00356417	0.0105763	0.00422003	0.00134851	-1.44825e-05	0.00358612	0.00269195	0.00278237	0.00335325	0.00413376	0.00227597	0.00359042	0.00677634	0.00498883	0.00292899	0.00280439
1.196	-0.00514075	-0.00351145	0.00504866	-0.00061799	0.00234551	-0.000299757	0.00411427	0.0102714	0.00434073	0.00146978	0.000566561	0.00358309	0.00265852	0.00305617	0.00335834	0.00417701	0.0026062	0.00385439	0.00691663	0.00509232	0.00305453	0.00292673
1.197	-0.00567712	-0.00333437	0.00530733	-0.000770135	0.00217949	-0.000497564	0.00465386	0.00989238	0.0045632	0.00166842	0.00111833	0.00356769	0.00261346	0.00331966	0.00335205	0.00418696	0.00292007	0.00410391	0.00698772	0.00520242	0.00317329	0.00306305
1.198	-0.00621364	-0.00312106	0.00547245	-0.000983156	0.00199485	-0.000780876	0.00517066	0.00945517	0.00488186	0.00194861	0.00162553	0.00353069	0.0025559	0.00353975	0.00333487	0.00416699	0.00320714	0.00432539	0.00697928	0.00532194	0.0032767	0.00321393
1.199	-0.00673151	-0.00286583	0.00552709	-0.00125681	0.00177634	-0.00115331	0.00564683	0.00897651	0.00527701	0.00229829	0.00207045	0.00346495	0.00248721	0.00369363	0.00330944	0.00412231	0.00346154	0.00451267	0.00688789	0.00545237	0.00336036	0.00337835
1.2	-0.00721045	-0.00256717	0.00546127	-0.00158508	0.00150963	-0.00160661	0.00606577	0.00847489	0.00572248	0.00270054	0.00243994	0.00336351	0.00240887	0.00376897	0.00327992	0.0040605	0.00368214	0.0046643	0.00671717	0.00559489	0.00342694	0.00355136
1.201	-0.00763359	-0.00222617	0.00527129	-0.00195627	0.00118268	-0.00212384	0.00641167	0.00797107	0.00618901	0.00313648	0.00272845	0.00322307	0.00232443	0.00376213	0.00325125	0.00398943	0.003869	0.00478192	0.00647646	0.00574879	0.00348156	0.00372543
1.202	-0.00798553	-0.00184598	0.00496101	-0.00235421	0.000786685	-0.00268104	0.00667014	0.00748505	0.00664405	0.00358328	0.0029356	0.00304336	0.00224041	0.00367749	0.0032288	0.00391598	0.00402268	0.00486839	0.00617978	0.00591123	0.00352983	0.00389022
1.203	-0.00825357	-0.00143161	0.00454142	-0.00275959	0.000317126	-0.00324928	0.00682925	0.00703475	0.00705427	0.00401571	0.00306592	0.00282718	0.00216727	0.00352613	0.00321755	0.00384484	0.00414352	0.00492605	0.00584406	0.00607712	0.00357569	0.00403387
1.204	-0.00842872	-0.000989588	0.00402965	-0.00315154	-0.000225439	-0.0037972	0.00688048	0.00663462	0.00738806	0.00440808	0.00312822	0.00258052	0.00211951	0.00332417	0.00322119	0.00377785	0.00423148	0.00495549	0.00548704	0.00623939	0.00362021	0.00414452
1.205	-0.00850651	-0.000527577	0.00344787	-0.00350913	-0.000834785	-0.0042937	0.00682012	0.00629477	0.00761791	0.0047363	0.00313496	0.00231284	0.00211402	0.00309103	0.00324174	0.00371394	0.00428667	0.00495502	0.00512541	0.00638969	0.00366167	0.00421183
1.206	-0.00848771	-5.38113e-05	0.00282107	-0.00381332	-0.0014994	-0.00471034	0.00664853	0.00601995	0.00772286	0.00497933	0.00310085	0.00203795	0.00216589	0.00284769	0.00327963	0.00365008	0.00431017	0.00492158	0.0047732	0.00651909	0.00369667	0.00422823
1.207	-0.00837844	0.00042315	0.00217528	-0.00404854	-0.00220305	-0.00502368	0.00637011	0.00580914	0.00769025	0.00512058	0.00304131	0.00177582	0.00228299	0.0026152	0.00333425	0.00358245	0.00430508	0.00485199	0.00444112	0.00661904	0.00372211	0.00418969
1.208	-0.00819053	0.000893241	0.00153617	-0.00420314	-0.00292419	-0.0052153	0.00599557	0.00565517	0.00751837	0.00515152	0.00297288	0.00155426	0.00246228	0.00241316	0.00340447	0.00350745	0.00427743	0.00474334	0.00413662	0.00668274	0.0037368	0.00409595
1.209	-0.00794051	0.0013503	0.000927551	-0.00427052	-0.00364006	-0.00527813	0.00553913	0.00554723	0.00721305	0.00506963	0.00290978	0.00141083	0.00269223	0.00225921	0.00349145	0.00342335	0.00423535	0.00459582	0.00386467	0.00670453	0.00374253	0.00395218
1.21	-0.00764508	0.00178852	0.000370025	-0.00425091	-0.00432551	-0.00521569	0.0050185	0.00546803	0.00678615	0.00487208	0.00286019	0.00137933	0.00295473	0.00217031	0.00359363	0.00333012	0.00419052	0.00441267	0.00362943	0.00668168	0.00374498	0.00376577
1.211	-0.00732601	0.00220257	-0.000120634	-0.00414885	-0.00495504	-0.00503813	0.0044544	0.00539942	0.00626142	0.00456864	0.00283329	0.00146772	0.00322956	0.00215948	0.00371074	0.00323061	0.00415464	0.00420053	0.00343406	0.00661384	0.00375164	0.00354885
1.212	-0.00700615	0.00258836	-0.000533962	-0.00397345	-0.0055047	-0.00476341	0.0038691	0.00532202	0.00566924	0.00417503	0.00283511	0.00165093	0.0034972	0.00223436	0.00384192	0.00313039	0.00413735	0.00396895	0.00328058	0.00650302	0.00376995	0.00331705
1.213	-0.00670775	0.00294315	-0.000865087	-0.00373742	-0.00595378	-0.00441582	0.00328516	0.00521685	0.00504439	0.00371162	0.00286828	0.00189149	0.0037403	0.00239476	0.003985	0.00303754	0.00414349	0.00372911	0.00316849	0.00635336	0.00380474	0.00308925
1.214	-0.00645089	0.00326536	-0.00111458	-0.00345575	-0.00628622	-0.0040239	0.0027242	0.00506678	0.00442325	0.00320173	0.0029321	0.00215807	0.00394456	0.00263196	0.00413598	0.00296229	0.00417148	0.00349189	0.00309323	0.00617069	0.00385606	0.00288715
1.215	-0.00625199	0.00355451	-0.00128791	-0.00314424	-0.0064914	-0.00361829	0.00220621	0.00485834	0.00384076	0.00267005	0.00302338	0.00242934	0.00409933	0.00293041	0.00428896	0.00291596	0.00421349	0.00326556	0.00304565	0.00596227	0.00391843	0.00273401
1.216	-0.00612255	0.00381102	-0.00139467	-0.00281812	-0.0065655	-0.00322889	0.00174765	0.00458243	0.00332817	0.00214041	0.00313645	0.00269177	0.00419796	0.00327048	0.00443653	0.00290962	0.00425734	0.00305449	0.00301327	0.00573615	0.00398181	0.00265165
1.217	-0.0060679	0.00403568	-0.00144755	-0.00249079	-0.00651241	-0.00288244	0.00136037	0.00423455	0.00291106	0.00163366	0.00326302	0.00293715	0.00423823	0.00363081	0.00457056	0.00295204	0.0042894	0.00285854	0.00298291	0.00550066	0.00403378	0.0026552
1.218	-0.0060872	0.00422897	-0.00146084	-0.00217166	-0.00634255	-0.00259981	0.00105355	0.00381651	0.00260739	0.00116741	0.00339518	0.00316084	0.0042224	0.00399012	0.00468287	0.00304692	0.00429765	0.00267352	0.00294393	0.00526464	0.00406197	0.00274758
1.219	-0.00617411	0.00439197	-0.00144926	-0.00186641	-0.0060718	-0.00239494	0.000832199	0.00333668	0.00242609	0.000755422	0.003525	0.00336021	0.00415717	0.004328	0.00476725	0.00319164	0.0042739	0.00249386	0.00289015	0.00503726	0.00405655	0.0029183
1.22	-0.00631437	0.00452677	-0.00142685	-0.0015795	-0.00572206	-0.00227825	0.000693831	0.00280552	0.00236244	0.000401544	0.00364208	0.00353466	0.00405313	0.00462691	0.00481896	0.00337699	0.0042154	0.00231602	0.0028209	0.00482609	0.00401146	0.00314803
1.221	-0.0064892	0.00463361	-0.00140586	-0.00130963	-0.00531938	-0.00224982	0.00063359	0.00223874	0.00240472	0.000105377	0.00374018	0.00368465	0.00392382	0.00487267	0.00483501	0.00358908	0.00412508	0.00214138	0.00274202	0.00463777	0.00392526	0.0034135
1.222	-0.00667707	0.00471225	-0.0013957	-0.00105193	-0.00489164	-0.00230155	0.000643369	0.0016559	0.00253376	-0.000137578	0.00381603	0.00381065	0.00378457	0.00505468	0.00481567	0.00381166	0.00401113	0.00197811	0.00266374	0.00447752	0.00380137	0.00369142
1.223	-0.00685472	0.00476202	-0.00140238	-0.00079887	-0.00446689	-0.00241833	0.000712556	0.00107804	0.00272423	-0.000336309	0.00386889	0.00391306	0.00365089	0.00516676	0.00476412	0.00402808	0.00388607	0.0018415	0.00259773	0.00434835	0.00364766	0.00396079
1.224	-0.00699913	0.00478198	-0.00142822	-0.0005413	-0.00407138	-0.00257948	0.000828987	0.000525948	0.00294689	-0.00050323	0.0039004	0.00399193	0.00353644	0.00520735	0.00468634	0.004223	0.00376488	0.00175091	0.00255298	0.00425069	0.00347561	0.00420396
1.225	-0.00708918	0.0047713	-0.00147162	-0.000269472	-0.00372731	-0.00276071	0.000980379	1.86091e-05	0.00317095	-0.000652541	0.00391474	0.00404713	0.0034511	0.00517955	0.00459083	0.00438371	0.00366256	0.00172273	0.00253205	0.00418247	0.00329923	0.00440748
1.226	-0.00710776	0.00472932	-0.00152753	2.52628e-05	-0.00345165	-0.00293614	0.00115455	-0.000428615	0.003367	-0.000799087	0.00391726	0.00407841	0.00339964	0.00509085	0.00448806	0.00450113	0.00359133	0.00176107	0.00252944	0.00413941	0.00313367	0.00456234
1.227	-0.00704345	0.00465528	-0.00158838	0.000348854	-0.00325609	-0.00308021	0.00133941	-0.000805744	0.00350997	-0.000957847	0.00391257	0.00408564	0.00338171	0.00495267	0.0043895	0.00457033	0.00355804	0.00185381	0.00253318	0.00411545	0.00299403	0.00466374
1.228	-0.00689105	0.00454924	-0.00164416	0.000704599	-0.00314458	-0.0031702	0.00152539	-0.00110837	0.00358056	-0.00114135	0.00390587	0.0040695	0.00339266	0.00477934	0.00430669	0.00459072	0.003563	0.00197944	0.00252863	0.00410388	0.00289348	0.00471233
1.229	-0.00665048	0.00441173	-0.00168232	0.00109321	-0.00311333	-0.00318679	0.0017053	-0.00133621	0.00356854	-0.00135697	0.00390244	0.00403098	0.0034251	0.00458688	0.00425006	0.00456509	0.00360058	0.00211555	0.0025025	0.00409844	0.00284158	0.00471382
1.23	-0.00633457	0.00424389	-0.00169149	0.00150805	-0.00315232	-0.00311821	0.00187348	-0.00149877	0.00346884	-0.00161153	0.00390216	0.00397327	0.00347178	0.00439139	0.00422719	0.00450085	0.00366076	0.00224468	0.00244674	0.00409263	0.00284389	0.00467799
1.231	-0.00595739	0.00404921	-0.00166198	0.00194146	-0.00324501	-0.00295948	0.00202767	-0.00161109	0.00328629	-0.00190704	0.0039054	0.00390092	0.00352482	0.00420752	0.00424086	0.00440719	0.00373144	0.00235696	0.00235903	0.00407932	0.00290111	0.00461795
1.232	-0.00554009	0.00383103	-0.00158435	0.00238152	-0.00336994	-0.00271215	0.00216713	-0.00169141	0.00303493	-0.00223975	0.00391062	0.00381896	0.00357791	0.00404605	0.00428963	0.00429416	0.00380145	0.00244937	0.00224451	0.00405289	0.0030092	0.00454801
1.233	-0.00510785	0.00359332	-0.00145147	0.00281369	-0.0035024	-0.00238457	0.00229277	-0.00176084	0.00273579	-0.00260141	0.00391417	0.00373301	0.00362584	0.00391299	0.00436778	0.00417087	0.00386142	0.00252475	0.00211484	0.00400851	0.00316064	0.00448187
1.234	-0.00468796	0.00334052	-0.00125921	0.0032219	-0.00361642	-0.00199107	0.00240659	-0.00184157	0.00241497	-0.00297992	0.00391045	0.00364887	0.00366454	0.0038094	0.00446641	0.00404423	0.0039046	0.00258986	0.00198654	0.00394253	0.0033454	0.00443054
1.235	-0.00430738	0.00307737	-0.00100675	0.00358981	-0.00368649	-0.00155062	0.00251158	-0.00195479	0.00210136	-0.0033598	0.00389272	0.00357237	0.00369101	0.00373261	0.00457497	0.00391827	0.00392723	0.00265317	0.00187775	0.00385313	0.00355172	0.00440089
1.236	-0.0039912	0.00280873	-0.00069683	0.00390202	-0.00368969	-0.00108539	0.0026105	-0.00211897	0.00182388	-0.00372361	0.00385337	0.00350879	0.0037035	0.00367825	0.00468272	0.00379449	0.00392882	0.00272186	0.00180323	0.0037413	0.00376697	0.00439492
1.237	-0.00376154	0.00253877	-0.000336135	0.00414502	-0.00360849	-0.000618781	0.0027043	-0.0023482	0.00160878	-0.00405433	0.00378379	0.00346229	0.00370196	0.00364257	0.00478001	0.00367299	0.00391236	0.00279924	0.00176908	0.00361202	0.00397849	0.00441001
1.238	-0.00363401	0.00227123	6.55164e-05	0.00430859	-0.00343097	-0.000173364	0.0027938	-0.00265036	0.00147763	-0.00433506	0.0036766	0.00343668	0.00368811	0.00362396	0.00485924	0.00355426	0.00388433	0.00288432	0.00177025	0.00347506	0.00417404	0.00444061
1.239	-0.00361622	0.00200994	0.000496664	0.00438754	-0.00315186	0.000230652	0.00287862	-0.00302378	0.00144581	-0.00455	0.00352577	0.00343469	0.0036652	0.00362298	0.00491554	0.00344023	0.00385459	0.00297179	0.00179343	0.00334578	0.00434201	0.00447927
1.24	-0.00371162	0.00175613	0.000941309	0.00437931	-0.00277398	0.000576906	0.00295643	-0.0034636	0.00151922	-0.00468733	0.00332676	0.00345789	0.00363824	0.0036413	0.00494678	0.00333574	0.00383441	0.00305276	0.00182329	0.00324421	0.00447428	0.0045186
1.241	-0.00391216	0.00151133	0.00138316	0.00428518	-0.00230662	0.000854575	0.00302478	-0.00395771	0.0016954	-0.00473956	0.00307838	0.00350662	0.0036122	0.00368189	0.004953	0.00324828	0.00383497	0.00311842	0.00184634	0.00319049	0.00456521	0.00455104
1.242	-0.00420257	0.00127655	0.00180608	0.00411139	-0.00176585	0.00105853	0.00308011	-0.00448586	0.00196427	-0.004703	0.00278293	0.00357889	0.00359109	0.00374428	0.00493696	0.00318495	0.0038649	0.0031612	0.00185538	0.00320143	0.00461212	0.00456909
1.243	-0.00456159	0.00105212	0.00219426	0.00386748	-0.00117322	0.00118964	0.00311816	-0.00502291	0.00230821	-0.00457878	0.00244581	0.0036705	0.00357678	0.00382342	0.00490317	0.0031504	0.00392768	0.00317651	0.00185002	0.00328392	0.00461612	0.00456539
1.244	-0.00496292	0.000838096	0.00253335	0.00356553	-0.000553918	0.00125458	0.00313454	-0.00554034	0.00270363	-0.00437281	0.00207526	0.00377532	0.00356829	0.0039095	0.00485707	0.00314474	0.00402045	0.00316417	0.00183604	0.00343176	0.00458205	0.00453263
1.245	-0.00537665	0.000634796	0.00281132	0.00321909	6.51874e-05	0.00126522	0.00312571	-0.00600833	0.00312312	-0.0040953	0.00168174	0.00388632	0.00356171	0.00398886	0.00480399	0.00316311	0.00413473	0.00312925	0.001824	0.00362757	0.0045182	0.00446375
1.246	-0.00577173	0.000442849	0.003019	0.00284215	0.000657739	0.00123726	0.00308892	-0.00639815	0.00353775	-0.00376026	0.00127711	0.00399615	0.00355118	0.00404582	0.00474832	0.00319717	0.00425843	0.0030822	0.00182707	0.00384821	0.00443566	0.00435247
1.247	-0.00611985	0.000261926	0.00315015	0.00244801	0.00119931	0.0011887	0.00302095	-0.0066845	0.00391901	-0.00338525	0.000874096	0.00409735	0.00353048	0.00406476	0.0046928	0.00323819	0.00437868	0.00303872	0.00185803	0.00407034	0.00434738	0.00419436
1.248	-0.00639491	9.27825e-05	0.0032022	0.0020484	0.00166966	0.00113886	0.00292092	-0.00684728	0.00424181	-0.00298974	0.000484923	0.00418454	0.00349438	0.00403206	0.00463825	0.00327991	0.00448442	0.00301765	0.00192607	0.00427379	0.00426671	0.00398766
1.249	-0.00657582	-6.32674e-05	0.00317665	0.00165288	0.00205438	0.00110654	0.00278938	-0.00687311	0.00448659	-0.00259401	0.000120514	0.00425446	0.0034401	0.00393761	0.00458356	0.0033206	0.00456814	0.00303716	0.00203469	0.00444343	0.00420553	0.0037343
1.25	-0.00664886	-0.000204398	0.00308012	0.00126852	0.0023462	0.00110798	0.00262779	-0.00675599	0.00464097	-0.00221791	-0.000210576	0.00430618	0.00336837	0.00377547	0.0045257	0.0033634	0.00462688	0.00310945	0.00218163	0.0045695	0.00417228	0.00344077
1.251	-0.00660672	-0.000329179	0.0029161	0.000898652	0.00254206	0.00115615	0.00244009	-0.00650189	0.00469772	-0.00188088	-0.000503146	0.00434095	0.00328372	0.00354623	0.00446308	0.00341501	0.00466137	0.00323865	0.0023597	0.00464744	0.00417255	0.00311935
1.252	-0.00644778	-0.000435402	0.00269429	0.000544728	0.00264836	0.00126078	0.00223108	-0.0061229	0.00466065	-0.00159843	-0.000754091	0.00436114	0.00319401	0.00325691	0.00439348	0.0034823	0.00467605	0.00341795	0.00255963	0.00467785	0.00420593	0.002788
1.253	-0.0061789	-0.000521401	0.00242594	0.000205953	0.0026772	0.00142593	0.00200619	-0.00563979	0.00454108	-0.00138316	-0.000963778	0.00436982	0.00310943	0.00292132	0.00431526	0.00356898	0.00467793	0.00363238	0.00277093	0.00466476	0.00426824	0.0024715
1.254	-0.00581332	-0.00058613	0.00212345	-0.000120044	0.00264581	0.00165051	0.00177113	-0.00507997	0.00435723	-0.00124335	-0.00113556	0.00436956	0.00304095	0.00256256	0.00422764	0.00367294	0.00467521	0.00386305	0.00298283	0.00461461	0.00435266	0.00220086
1.255	-0.00536929	-0.000629283	0.00179952	-0.000436572	0.00257489	0.00192835	0.00153167	-0.00447543	0.00413261	-0.00118232	-0.00127537	0.00436158	0.00299839	0.00221654	0.00413056	0.00378547	0.00467608	0.00409075	0.00318461	0.00453497	0.0044513	0.00200948
1.256	-0.00486853	-0.00065164	0.00146679	-0.000747025	0.00248681	0.00224888	0.00129302	-0.00386065	0.00389404	-0.00119823	-0.00139104	0.00434529	0.00298872	0.00193626	0.00402433	0.00389292	0.00468801	0.00429858	0.00336594	0.00443343	0.00455676	0.0019226
1.257	-0.00433481	-0.000656426	0.00113715	-0.0010539	0.00240363	0.00259831	0.00105856	-0.00327041	0.00366884	-0.00128474	-0.00149117	0.0043183	0.00301514	0.0017877	0.00390928	0.00397971	0.00471742	0.0044738	0.00351728	0.00431696	0.00466336	0.00194334
1.258	-0.00379156	-0.000648035	0.000820883	-0.00135873	0.00234513	0.00296037	0.000830953	-0.00273662	0.00348268	-0.00143051	-0.00158441	0.00427724	0.00307723	0.00181817	0.00378549	0.00403172	0.00476963	0.00460744	0.00363032	0.00419155	0.00476702	0.00204988
1.259	-0.00326033	-0.000632443	0.000526582	-0.0016614	0.00232713	0.00331786	0.000611527	-0.00228621	0.00335743	-0.00162019	-0.00167854	0.00421868	0.00317211	0.00201454	0.00365294	0.00403907	0.00484887	0.00469458	0.00369855	0.00406236	0.00486526	0.00220903
1.26	-0.00276213	-0.000616854	0.000263772	-0.00196034	0.00236124	0.00365533	0.000399936	-0.00193922	0.00331071	-0.00183645	-0.00177995	0.00414014	0.00329563	0.0023176	0.00351064	0.00399808	0.00495854	0.00473303	0.00371802	0.00393446	0.00495691	0.00239135
1.261	-0.00230922	-0.000607976	3.41518e-05	-0.00225155	0.00245026	0.00395733	0.000196476	-0.00170719	0.00334951	-0.00205931	-0.00189114	0.00404124	0.00344295	0.00266627	0.00336092	0.00391323	0.0050982	0.00472518	0.00368746	0.0038124	0.00504222	0.00257796
1.262	-0.00190819	-0.000616074	-0.000159374	-0.00252947	0.0025927	0.0042111	-1.54388e-06	-0.00159211	0.0034756	-0.00226649	-0.00201396	0.00392428	0.00360895	0.00301643	0.00320823	0.00379209	0.00526532	0.00467558	0.00360875	0.0037016	0.00511998	0.00275651
1.263	-0.00156141	-0.000649806	-0.000315645	-0.00278757	0.00278053	0.0044081	-0.000196148	-0.00158663	0.00368256	-0.00243805	-0.00214659	0.00379421	0.00378792	0.00334106	0.00305932	0.00364856	0.00545275	0.00459028	0.00348716	0.00360699	0.00518908	0.00292229
1.264	-0.00126586	-0.000716873	-0.000434848	-0.00301875	0.00300038	0.00454418	-0.000389159	-0.00167432	0.00395676	-0.00255639	-0.00228458	0.00365818	0.00397323	0.00362415	0.00292433	0.0034985	0.005649	0.00447667	0.0033317	0.00353222	0.00524777	0.00307417
1.265	-0.00101372	-0.00082293	-0.000518357	-0.00321595	0.00323483	0.00461989	-0.000581654	-0.00183079	0.00427846	-0.00260737	-0.00242112	0.00352454	0.00415736	0.00385699	0.00281599	0.00335608	0.00583891	0.00434328	0.00315533	0.00347839	0.00529373	0.00321264
1.266	-0.000793323	-0.000970924	-0.000568169	-0.00337277	0.00346392	0.00464047	-0.000773481	-0.00202541	0.00462366	-0.00258144	-0.00254777	0.00340128	0.00433233	0.00403611	0.00274728	0.00323007	0.00600521	0.00419995	0.00297504	0.00344299	0.0053245	0.00333888
1.267	-0.000591211	-0.00116214	-0.000586039	-0.0034837	0.00366736	0.00461509	-0.000963269	-0.00222389	0.00496632	-0.00247513	-0.0026556	0.00329451	0.00449054	0.00416205	0.00272764	0.00312146	0.0061306	0.00405824	0.00281125	0.00341979	0.00533829	0.00345462
1.268	-0.000392739	-0.00139355	-0.000574359	-0.00354514	0.00382586	0.00455639	-0.00114787	-0.00239013	0.00527979	-0.00229053	-0.00273568	0.00320694	0.00462574	0.00423812	0.00275906	0.00302398	0.00619986	0.00393134	0.00268604	0.00339977	0.00533404	0.00356246
1.269	-0.000183744	-0.00165846	-0.000535409	-0.00355547	0.00392304	0.00447945	-0.00132243	-0.00248903	0.00553928	-0.00203564	-0.00278009	0.00313727	0.00473407	0.00426978	0.00283436	0.00292721	0.00620171	0.00383339	0.00261911	0.00337288	0.00531204	0.00366656
1.27	4.72724e-05	-0.00194635	-0.00047031	-0.0035159	0.00394701	0.00440137	-0.00148053	-0.00248934	0.00572433	-0.00172479	-0.00278298	0.00308054	0.00481466	0.00426423	0.0029387	0.00282095	0.00613052	0.00377734	0.0026222	0.00333004	0.00527449	0.00377309
1.271	0.000308213	-0.00224246	-0.000378383	-0.00343033	0.00389137	0.0043392	-0.00161411	-0.0023643	0.00581918	-0.00137806	-0.00274051	0.00302972	0.0048701	0.00422897	0.00305315	0.00270013	0.0059863	0.00377169	0.00269387	0.00326505	0.00522512	0.00389005
1.272	0.000607045	-0.00253115	-0.000263286	-0.00330168	0.00375477	0.00430736	-0.00171523	-0.00209484	0.00581412	-0.00101526	-0.0026518	0.00297878	0.00490604	0.00417096	0.00315952	0.00256661	0.00577615	0.00381936	0.00282132	0.00317588	0.00516719	0.00402545
1.273	0.000946497	-0.00279576	-0.000127171	-0.00313555	0.00354223	0.00431898	-0.00177597	-0.00167178	0.00570757	-0.000659054	-0.00251942	0.00292345	0.00493021	0.0040971	0.00324273	0.0024298	0.00551397	0.00391374	0.00298458	0.00306539	0.00510513	0.00418631
1.274	0.0013247	-0.0030187	2.91722e-05	-0.00293909	0.0032642	0.00438396	-0.00178862	-0.00109474	0.00550451	-0.000333102	-0.00234839	0.00286295	0.00495137	0.00401254	0.00329201	0.00230569	0.00521826	0.00403946	0.00316151	0.00294153	0.00504316	0.00437635
1.275	0.00173603	-0.00318326	0.000205154	-0.00272025	0.00293581	0.00450818	-0.00174692	-0.000372517	0.00521632	-5.93672e-05	-0.00214589	0.00280102	0.0049779	0.00392059	0.00330176	0.00221164	0.00491061	0.00417593	0.0033323	0.00281656	0.00498449	0.00459427
1.276	0.00217181	-0.00327501	0.000400402	-0.00248738	0.0025754	0.00469324	-0.00164679	0.000477699	0.0048598	0.000143728	-0.00192059	0.002746	0.00501641	0.00382266	0.00327164	0.00215962	0.00461292	0.00430126	0.00348148	0.00270548	0.00493085	0.00483353
1.277	0.00262066	-0.00328361	0.000614894	-0.00224831	0.0022015	0.00493632	-0.00148692	0.00143113	0.0044558	0.0002622	-0.00168314	0.00271002	0.0050709	0.00371853	0.00320637	0.00215063	0.00434423	0.00439584	0.00359883	0.00262327	0.00488285	0.00508359
1.278	0.0030698	-0.00320293	0.000848294	-0.0020106	0.00183306	0.00522999	-0.00126921	0.00245778	0.00402708	0.000288592	-0.00144373	0.00270683	0.00514274	0.00360716	0.00311468	0.00217364	0.00411788	0.00444503	0.00367962	0.00258126	0.00483977	0.0053314
1.279	0.00350587	-0.00303213	0.00110016	-0.00178113	0.00148706	0.00556289	-0.000998985	0.00352433	0.0035967	0.000222567	-0.00121166	0.00274851	0.00523112	0.00348744	0.00300809	0.0022113	0.00393988	0.00444091	0.00372458	0.00258402	0.00480021	0.00556361
1.28	0.00391591	-0.00277607	0.00136988	-0.00156588	0.00117707	0.0059204	-0.000684965	0.0045964	0.00318629	7.12601e-05	-0.000994503	0.00284183	0.00533391	0.00335905	0.00289923	0.00224782	0.00380938	0.00438344	0.00373968	0.00262825	0.00476259	0.00576849
1.281	0.00428673	-0.002445	0.00165766	-0.00137346	0.000911906	0.0062851	-0.000338419	0.00563962	0.00281434	-0.000152636	-0.000800383	0.00298535	0.00544794	0.00322351	0.00279922	0.00227391	0.00372114	0.00428076	0.00373466	0.00270443	0.00472581	0.00593817
1.282	0.00461021	-0.00205345	0.00196177	-0.00120495	0.000696199	0.00664048	2.6406e-05	0.00662621	0.00249471	-0.0004286	-0.00062773	0.00317199	0.00557073	0.00308402	0.00271595	0.00229258	0.0036699	0.00414855	0.00372302	0.00280052	0.00468808	0.00606663
1.283	0.00487821	-0.00162305	0.00228053	-0.00106212	0.000528676	0.00696782	0.000392817	0.00753083	0.00223769	-0.000728739	-0.000476934	0.00338845	0.00569953	0.0029453	0.00265308	0.00231625	0.00365311	0.00400928	0.0037194	0.00290424	0.00464829	0.00615348
1.284	0.00508533	-0.0011768	0.00261203	-0.000946548	0.000402993	0.00724952	0.000744278	0.0083345	0.00204737	-0.00102311	-0.000343807	0.00361937	0.0058311	0.00281443	0.00260872	0.00236302	0.00367061	0.00388771	0.00373513	0.00300598	0.00460492	0.00620208
1.285	0.00522873	-0.000739048	0.00295383	-0.000858921	0.000308879	0.00746995	0.00106479	0.00902532	0.00192263	-0.00128033	-0.000221314	0.00384938	0.0059613	0.00270021	0.00257708	0.00244963	0.00372335	0.00380633	0.00377636	0.00309891	0.00455591	0.00621892
1.286	0.00530815	-0.000333745	0.00330283	-0.000799046	0.000233467	0.00761637	0.00133998	0.00959882	0.00185775	-0.00146976	-0.000100053	0.00406457	0.00608478	0.00261245	0.00255088	0.00258367	0.00381029	0.00377954	0.00384272	0.00317875	0.0044986	0.00621238
1.287	0.00532359	1.69517e-05	0.00365559	-0.000765595	0.000161803	0.0076791	0.00155794	0.0100569	0.0018428	-0.0015642	2.9778e-05	0.00425328	0.00619498	0.00256032	0.00252389	0.00276002	0.00392614	0.00380964	0.00392757	0.0032431	0.00443023	0.00619157
1.288	0.00527725	0.000294996	0.00400775	-0.000756402	7.9908e-05	0.0076524	0.00171043	0.0104077	0.00186548	-0.00154178	0.000178483	0.00440636	0.00628457	0.00255066	0.00249299	0.0029631	0.00406019	0.00388708	0.00402044	0.00329065	0.00434857	0.00616465
1.289	0.00517235	0.000487632	0.00435414	-0.000768364	-2.41232e-05	0.00753455	0.00179336	0.0106648	0.00191215	-0.00138788	0.000355513	0.00451742	0.0063461	0.00258576	0.0024592	0.00317302	0.00419758	0.00399494	0.00410977	0.00332062	0.00425293	0.00613777
1.29	0.00501281	0.000588463	0.00468876	-0.00079746	-0.000158714	0.00732773	0.00180712	0.0108449	0.00196923	-0.00109646	0.00056849	0.0045828	0.0063729	0.00266212	0.00242778	0.0033715	0.00432176	0.00411511	0.00418555	0.00333247	0.00414513	0.00611442
1.291	0.00480302	0.000597646	0.00500463	-0.000839877	-0.000328721	0.00703653	0.00175706	0.0109655	0.00202361	-0.000670704	0.000820932	0.00460065	0.00635986	0.00277043	0.00240759	0.00354565	0.00441715	0.00423283	0.00424136	0.00332529	0.00402998	0.00609553
1.292	0.00454883	0.000523944	0.00529447	-0.000890178	-0.000532304	0.00666961	0.00165211	0.0110459	0.00206526	-0.000124844	0.00111388	0.00457254	0.00630413	0.00289698	0.00240869	0.00368945	0.00447057	0.0043391	0.00427419	0.00329926	0.00391636	0.00607906
1.293	0.00425425	0.000380612	0.00555051	-0.000941289	-0.000762016	0.00623877	0.00150399	0.0111053	0.0020883	0.000520796	0.00144684	0.0045025	0.00620545	0.00302513	0.00243988	0.00380543	0.00447557	0.00443181	0.00428496	0.00325456	0.00381605	0.00606297
1.294	0.00392406	0.0001867	0.0057646	-0.000986697	-0.00100686	0.00575643	0.00132693	0.0111583	0.00208926	0.0012381	0.00181506	0.00439587	0.00606611	0.00313762	0.00250597	0.00390117	0.00443127	0.00451258	0.00427777	0.00319132	0.00374196	0.00604467
1.295	0.00356382	-3.45102e-05	0.00592871	-0.00102013	-0.00125202	0.00523562	0.00113616	0.0112155	0.00206794	0.00199302	0.00221067	0.0042594	0.00589084	0.00321808	0.00260637	0.0039866	0.0043422	0.00458449	0.00425831	0.0031099	0.00370541	0.00602169
1.296	0.00317975	-0.000257878	0.00603555	-0.00103606	-0.00148009	0.00468939	0.000946456	0.0112824	0.00202739	0.00274827	0.00262346	0.00410099	0.00568653	0.00325247	0.00273556	0.00407052	0.00421779	0.00464952	0.00423236	0.00301065	0.00371294	0.0059922
1.297	0.00277861	-0.000458457	0.00607897	-0.00103043	-0.00167467	0.00412825	0.000770712	0.0113608	0.00197275	0.00346622	0.00304058	0.00392957	0.00546189	0.00323051	0.00288494	0.00415751	0.00407188	0.00470648	0.00420432	0.0028938	0.0037639	0.00595506
1.298	0.00236828	-0.000613591	0.0060545	-0.00100089	-0.00181975	0.00356136	0.000618876	0.0114468	0.0019112	0.00411084	0.00344854	0.00375527	0.00522709	0.00314727	0.00304516	0.00424572	0.00392018	0.00475018	0.0041767	0.00275909	0.00385053	0.00590941
1.299	0.00195758	-0.000705046	0.00595981	-0.000947549	-0.00190239	0.0029955	0.000496787	0.0115329	0.00185076	0.00465047	0.00383379	0.00358979	0.0049934	0.00300498	0.00320788	0.00432737	0.00377849	0.00477218	0.00415019	0.00260577	0.00395987	0.00585433
1.3	0.00155612	-0.000720743	0.0057951	-0.000873242	-0.00191426	0.00243482	0.000405446	0.0116078	0.00179936	0.00505994	0.00418371	0.0034465	0.00477269	0.00281515	0.00336673	0.00439122	0.0036604	0.00476255	0.00412449	0.00243271	0.00407691	0.00578855
1.301	0.00117419	-0.00065622	0.0055632	-0.000783963	-0.00185316	0.00188077	0.000340634	0.0116578	0.00176359	0.00532215	0.00448733	0.00333996	0.00457644	0.00260134	0.0035177	0.00442597	0.00357532	0.00471199	0.00409954	0.00223865	0.00418765	0.00571024
1.302	0.000823274	-0.000515301	0.00526904	-0.000689708	-0.00172429	0.0013315	0.000292539	0.011667	0.00174767	0.00542903	0.00473472	0.00328382	0.00441411	0.00240143	0.00365898	0.00442339	0.00352694	0.0046136	0.00407664	0.00202253	0.00428145	0.00561674
1.303	0.000511946	-0.000308039	0.00492139	-0.000601203	-0.0015364	0.000785361	0.000247972	0.011624	0.00175604	0.00538195	0.00492114	0.00328894	0.00429235	0.00226566	0.00378975	0.00438199	0.00351315	0.00446601	0.00405925	0.00178587	0.00435081	0.00550714
1.304	0.000247893	-5.42574e-05	0.00453181	-0.000531064	-0.00130635	0.000239865	0.000190605	0.0115162	0.00178885	0.00519189	0.00504643	0.00335934	0.00421228	0.00224287	0.00391012	0.00430738	0.00352894	0.00427273	0.00405247	0.00153134	0.00439244	0.00538134
1.305	3.805e-05	0.000221332	0.00411262	-0.000493357	-0.00105612	-0.000307846	0.000101164	0.0113329	0.00184367	0.00487758	0.00511278	0.00349017	0.00416861	0.00235428	0.00402035	0.00421228	0.00356561	0.00404194	0.0040621	0.00126522	0.00440678	0.0052404
1.306	-0.000112605	0.000489809	0.00367712	-0.000501954	-0.000811276	-0.000859482	-4.00424e-05	0.0110664	0.00191581	0.00446402	0.00512569	0.00366842	0.00415012	0.0025788	0.00412031	0.00411476	0.0036134	0.00378589	0.00409304	0.00100059	0.0043971	0.00508739
1.307	-0.000202652	0.000721071	0.00323845	-0.000569935	-0.000599109	-0.00141611	-0.000251679	0.0107128	0.00199829	0.00398095	0.00509349	0.00387546	0.00414139	0.00286848	0.00420947	0.00403449	0.0036626	0.00351957	0.00414757	0.000766134	0.00436835	0.00492748
1.308	-0.000233201	0.000885604	0.00280906	-0.000707552	-0.000446066	-0.00197601	-0.000548965	0.0102718	0.0020835	0.00345988	0.00502649	0.00409063	0.00412583	0.0031725	0.00428683	0.00398745	0.00370429	0.00325831	0.00422468	0.000623556	0.00432635	0.00476784
1.309	-0.00020845	0.000957303	0.00239974	-0.0009213	-0.000375713	-0.00253474	-0.000942204	0.00974693	0.00216367	0.00293182	0.00493626	0.00429393	0.00408859	0.00344973	0.00435134	0.00398087	0.00373079	0.00301553	0.00432005	0.000650383	0.00427696	0.00461697
1.31	-0.000135542	0.000915839	0.00201884	-0.0012129	-0.000406664	-0.00308496	-0.00143538	0.00914511	0.00223169	0.00242498	0.00483469	0.00446796	0.00401919	0.00367124	0.00440235	0.00401063	0.00373614	0.00280059	0.0044271	0.000829616	0.00422542	0.00448361
1.311	-2.41866e-05	0.00074863	0.00167167	-0.00157854	-0.000550856	-0.00361653	-0.00202519	0.00847642	0.0022819	0.00196272	0.00473315	0.00459888	0.00391351	0.00381976	0.00443994	0.00406258	0.00371646	0.00261777	0.00453849	0.00107949	0.00417608	0.00437544
1.312	0.00011522	0.000452021	0.0013602	-0.00200749	-0.000812871	-0.00411594	-0.00270108	0.00775139	0.00230951	0.00156165	0.00464236	0.00467708	0.00377489	0.00388869	0.0044653	0.00411686	0.0036702	0.00246634	0.00464744	0.00134866	0.00413218	0.00429734
1.313	0.000268794	3.22208e-05	0.00108289	-0.00248709	-0.00118719	-0.00457136	-0.0034446	0.00698568	0.00231516	0.00123058	0.00456793	0.0046965	0.00361657	0.00388103	0.00448119	0.00415378	0.00359792	0.00234432	0.00474859	0.00161215	0.00409614	0.00425122
1.314	0.000422165	-0.000494203	0.000835142	-0.00299569	-0.00166147	-0.00496709	-0.00422866	0.00619494	0.00230092	0.000972798	0.00451736	0.00465657	0.00345787	0.00380909	0.00448833	0.00415693	0.00350538	0.0022519	0.00483832	0.00185738	0.0040693	0.00423568
1.315	0.000562761	-0.00110218	0.000609323	-0.00350829	-0.00221493	-0.00528818	-0.00502227	0.00539412	0.00227078	0.000782723	0.0044936	0.00456003	0.00332455	0.00369285	0.00448827	0.00411634	0.00340004	0.00219135	0.00491415	0.00207738	0.00405198	0.00424581
1.316	0.000679525	-0.00175931	0.000395818	-0.00399692	-0.00282012	-0.00552077	-0.0057905	0.0045974	0.00223128	0.000648476	0.0044967	0.00441306	0.00324307	0.00355809	0.00448168	0.00402913	0.00329157	0.00216782	0.00497411	0.00226886	0.00404351	0.00427492
1.317	0.000763653	-0.00242846	0.000183727	-0.0044335	-0.00344621	-0.00565455	-0.00649784	0.00381795	0.00218932	0.00055234	0.00452463	0.00422489	0.00323295	0.00343313	0.00446789	0.00390002	0.00319065	0.00218661	0.00501576	0.00243041	0.00404288	0.00431558
1.318	0.000809185	-0.00307008	-3.75688e-05	-0.00479066	-0.00405956	-0.00568237	-0.00710921	0.00306707	0.0021536	0.000473669	0.0045732	0.00400758	0.00329929	0.00334408	0.00444496	0.00373968	0.00310786	0.00224898	0.00503589	0.00256341	0.00404868	0.00436127
1.319	0.000813243	-0.00364528	-0.000277404	-0.0050443	-0.00462682	-0.00560168	-0.00759278	0.00235399	0.00213307	0.0003906	0.00463684	0.00377609	0.00343093	0.00330921	0.00441017	0.00356368	0.00305203	0.00234951	0.00503036	0.00267126	0.00405977	0.00440706
1.32	0.000776042	-0.0041188	-0.000542729	-0.00517549	-0.00511741	-0.00541509	-0.00792224	0.00168578	0.00213614	0.00028213	0.00470929	0.00354848	0.0036054	0.00333486	0.00436081	0.00339085	0.00302893	0.00247651	0.00499451	0.00275904	0.00407587	0.00444988
1.321	0.000700674	-0.00446171	-0.000837191	-0.00517215	-0.00550572	-0.00513056	-0.00807871	0.0010673	0.00216989	0.000130065	0.00478435	0.00334594	0.00379685	0.00341538	0.00429507	0.00324109	0.00304056	0.00261491	0.00492404	0.0028328	0.00409796	0.00448832
1.322	0.000593599	-0.00465396	-0.0011604	-0.00502948	-0.00577256	-0.00476056	-0.00805222	0.000501135	0.00223935	-7.93999e-05	0.00485716	0.0031917	0.00398249	0.00353759	0.00421252	0.00313266	0.00308516	0.00274976	0.00481614	0.00289854	0.00412836	0.00452215
1.323	0.000461781	-0.00468698	-0.00150705	-0.00475242	-0.00590715	-0.00432319	-0.00784232	-1.20709e-05	0.00234777	-0.00035471	0.0049247	0.00310704	0.00414597	0.00368572	0.00411477	0.00307901	0.00315793	0.00286918	0.00467029	0.00296084	0.0041704	0.00455161
1.324	0.000311594	-0.00456083	-0.00186867	-0.00435569	-0.00590892	-0.00384062	-0.00745847	-0.000472573	0.00249503	-0.000697579	0.0049836	0.00310588	0.00427661	0.00384522	0.00400471	0.00308652	0.00325279	0.00296619	0.00448971	0.00302279	0.00422695	0.00457663
1.325	0.000152272	-0.00428647	-0.00223344	-0.00386026	-0.00578517	-0.00333545	-0.00691975	-0.000882321	0.00267774	-0.00110303	0.00503298	0.0031889	0.00437012	0.00400539	0.00388599	0.00315356	0.00336218	0.00303888	0.00428195	0.00308508	0.00429954	0.00459638
1.326	-7.91447e-06	-0.00388575	-0.00258608	-0.00329439	-0.00555109	-0.00283167	-0.00625338	-0.00124399	0.00289019	-0.0015602	0.0050734	0.00334166	0.004427	0.00415807	0.00376232	0.0032714	0.00347773	0.00309033	0.0040588	0.00314584	0.00438716	0.00460952
1.327	-0.000161261	-0.00338993	-0.00291048	-0.00269097	-0.00522906	-0.00235161	-0.00549288	-0.00156233	0.00312315	-0.00205379	0.00510911	0.00353897	0.00445087	0.00429673	0.00363601	0.00342734	0.00359106	0.00312773	0.00383662	0.00320075	0.00448618	0.00461218
1.328	-0.000301774	-0.00283624	-0.00318996	-0.00208554	-0.0048463	-0.00191473	-0.00467611	-0.00184208	0.00336625	-0.00256454	0.00514497	0.00375169	0.00444657	0.00441493	0.00350731	0.00360679	0.00369414	0.00316089	0.00363478	0.00324467	0.00458991	0.00460063
1.329	-0.000425168	-0.00226548	-0.00340914	-0.00151363	-0.00443288	-0.00153609	-0.00384253	-0.0020882	0.00360816	-0.00307115	0.00518702	0.00395229	0.00441887	0.00450586	0.00337446	0.00379531	0.00377986	0.00320019	0.00347388	0.00327256	0.00468981	0.00457103
1.33	-0.000528902	-0.00171895	-0.00355549	-0.00100808	-0.00401946	-0.00122515	-0.00303057	-0.00230565	0.00383735	-0.00355205	0.0052419	0.0041183	0.00437169	0.0045626	0.00323476	0.00397964	0.00384276	0.00325447	0.0033724	0.00328064	0.00477691	0.00452007
1.331	-0.000611999	-0.00123538	-0.0036206	-0.000596601	-0.00363495	-0.000984949	-0.00227509	-0.00249914	0.00404296	-0.0039871	0.00531627	0.00423432	0.004308	0.00457908	0.00308646	0.00414839	0.00387974	0.00332933	0.00334274	0.00326717	0.00484338	0.00444562
1.332	-0.000674677	-0.000848119	-0.00360122	-0.000299676	-0.00330434	-0.000811942	-0.00160508	-0.00267296	0.00421554	-0.00435914	0.00541611	0.00429319	0.00423012	0.00455155	0.00293105	0.0042925	0.0038905	0.00342639	0.00338814	0.00323307	0.00488375	0.00434729
1.333	-0.000716307	-0.000583824	-0.00349896	-0.000126041	-0.0030457	-0.000694499	-0.00104169	-0.00282967	0.00434761	-0.00465535	0.00554611	0.00429654	0.00414007	0.00448044	0.00277409	0.00440491	0.00387755	0.00354338	0.00350187	0.00318177	0.00489561	0.00422661
1.334	-0.000740195	-0.000458992	-0.00332354	-8.10966e-05	-0.00287349	-0.000618367	-0.000597145	-0.00297384	0.00443398	-0.00486957	0.00571103	0.00425579	0.00404172	0.00437055	0.00263036	0.00448278	0.00384697	0.00367623	0.00367083	0.00311922	0.00488045	0.00408745
1.335	-0.000747203	-0.000477088	-0.00308884	-0.000156584	-0.00279208	-0.000564791	-0.000274932	-0.00310723	0.00447355	-0.00499763	0.00590961	0.00419025	0.00393886	0.0042314	0.00252004	0.00452655	0.00380483	0.00381825	0.00387832	0.00305473	0.00484229	0.00393528
1.336	-0.000736967	-0.000632244	-0.00281387	-0.000336131	-0.00279846	-0.000512537	-6.95483e-05	-0.00323035	0.00446725	-0.00504133	0.0061388	0.00412518	0.00383584	0.00407763	0.00246578	0.00453915	0.00375772	0.00396275	0.00410689	0.0029991	0.00478726	0.00377784
1.337	-0.000707546	-0.000909644	-0.00252128	-0.000594859	-0.00288226	-0.000439109	3.36342e-05	-0.00334455	0.00441776	-0.00500871	0.00639407	0.00408692	0.00373719	0.00392678	0.00248464	0.00452595	0.00371082	0.00410262	0.00433955	0.00296452	0.00472323	0.00362303
1.338	-0.0006559	-0.00128539	-0.0022355	-0.000902537	-0.00302684	-0.000324182	5.53403e-05	-0.00344962	0.00433059	-0.00491079	0.00666738	0.00409631	0.00364578	0.00379629	0.00257993	0.00449403	0.00366617	0.00423123	0.0045606	0.00296355	0.00465733	0.0034796
1.339	-0.000577779	-0.0017291	-0.00198104	-0.00122557	-0.00321076	-0.000151278	2.08995e-05	-0.00354456	0.00421307	-0.00476116	0.00694822	0.00416234	0.00356212	0.00369946	0.0027388	0.00445117	0.0036223	0.00434224	0.00475566	0.00300786	0.00459527	0.00335587
1.34	-0.000468054	-0.00220649	-0.00178052	-0.00152971	-0.00340962	9.03923e-05	-4.20856e-05	-0.00362766	0.00407368	-0.00457466	0.00722405	0.00427928	0.00348411	0.0036418	0.0029375	0.00440481	0.00357488	0.00442966	0.00491184	0.00310674	0.00454069	0.00325885
1.341	-0.000321228	-0.00268216	-0.0016529	-0.00178271	-0.00359798	0.000404505	-0.000106192	-0.00369664	0.00392137	-0.004366	0.00748089	0.00442932	0.00340775	0.00361938	0.00314938	0.00436108	0.00351838	0.00448806	0.0050182	0.00326528	0.00449522	0.00319356
1.342	-0.000132074	-0.00312241	-0.00161191	-0.00195698	-0.00375134	0.000786733	-0.00014655	-0.00374878	0.00376479	-0.00414846	0.00770409	0.00458862	0.00332859	0.00362041	0.0033506	0.00432418	0.0034483	0.0045129	0.00506642	0.00348301	0.00445915	0.00316253
1.343	0.000104466	-0.00349857	-0.00166407	-0.00203144	-0.00384755	0.00122361	-0.000142985	-0.00378039	0.00361208	-0.00393243	0.00787827	0.00473353	0.00324347	0.00362904	0.0035227	0.00429578	0.0033634	0.00450099	0.00505143	0.00375351	0.00443196	0.00316495
1.344	0.000389885	-0.00378914	-0.00181027	-0.00199349	-0.00386987	0.00169595	-8.13011e-05	-0.00378841	0.00346858	-0.00372731	0.00799026	0.00484538	0.00315212	0.00363054	0.003653	0.0042765	0.00326699	0.00445097	0.00497255	0.00406424	0.00441392	0.00319827
1.345	0.000724142	-0.00397795	-0.0020438	-0.00183996	-0.00380659	0.00217671	4.49662e-05	-0.00377063	0.00333886	-0.00353658	0.00802844	0.00491243	0.00305799	0.00361403	0.00373544	0.00426483	0.00316671	0.00436379	0.00483331	0.00439918	0.00440601	0.00325816
1.346	0.00110545	-0.00405863	-0.00235133	-0.00157793	-0.00365186	0.00263256	0.000234446	-0.00372368	0.00322504	-0.00335909	0.00798268	0.00492971	0.00296762	0.00357519	0.00376932	0.00425805	0.00307431	0.00424259	0.00464229	0.00473957	0.00440913	0.00333786
1.347	0.00152928	-0.00403552	-0.00271364	-0.00122211	-0.00340605	0.0030298	0.000477954	-0.0036462	0.00312611	-0.00319168	0.00784702	0.00489816	0.00289031	0.00351711	0.00375852	0.00425304	0.00300287	0.00409331	0.00441276	0.00506547	0.00442419	0.00342926
1.348	0.00198824	-0.0039214	-0.00310775	-0.000795408	-0.00307564	0.00333358	0.000759645	-0.00353684	0.00303896	-0.00302773	0.00761816	0.00482305	0.00283441	0.00345008	0.0037111	0.00424661	0.00296271	0.00392456	0.00416219	0.00535731	0.00445088	0.00352337
1.349	0.00247257	-0.00373673	-0.00350854	-0.000326328	-0.00267257	0.00351154	0.00105843	-0.00339513	0.00295833	-0.00285869	0.00729644	0.00471185	0.00280483	0.00339029	0.00363882	0.00423595	0.00295754	0.00374766	0.00391091	0.00559748	0.0044874	0.00361085
1.35	0.00297069	-0.00350782	-0.00389088	0.000153449	-0.00221322	0.00353646	0.00134989	-0.00322163	0.00287733	-0.00267511	0.00688584	0.00457262	0.00280092	0.00335736	0.00355679	0.00421884	0.00298246	0.00357642	0.00367998	0.00577171	0.00453061	0.00368272
1.351	0.00346994	-0.00326464	-0.0042317	0.000611701	-0.00171719	0.00338857	0.0016085	-0.00301797	0.0027879	-0.00246777	0.00639393	0.00441302	0.00281639	0.00337041	0.0034829	0.00419408	0.00302512	0.00342639	0.00348801	0.00587023	0.00457677	0.003731
1.352	0.0039575	-0.00303835	-0.00451199	0.00101834	-0.00120588	0.00305739	0.0018099	-0.00278694	0.00268152	-0.00222875	0.00583151	0.00424055	0.00284125	0.00344335	0.00343655	0.00416164	0.00306926	0.0033135	0.00334768	0.00588861	0.00462261	0.00374936
1.353	0.00442154	-0.00285904	-0.00471812	0.00134783	-0.000701206	0.00254256	0.00193284	-0.00253235	0.00254974	-0.0019522	0.00521201	0.00406371	0.00286482	0.00358094	0.00343585	0.00412285	0.00309887	0.00325155	0.00326298	0.00582823	0.00466624	0.00373372
1.354	0.00485249	-0.00275452	-0.00484306	0.0015819	-0.000224532	0.00185414	0.00196077	-0.00225846	0.00238411	-0.00163531	0.00455068	0.00389396	0.00287827	0.00377747	0.0034931	0.00408026	0.00310152	0.00324891	0.00322895	0.00569595	0.00470752	0.00368265
1.355	0.00524019	-0.00274442	-0.00488947	0.00171066	0.000206034	0.00101694	0.00188634	-0.00197197	0.00217934	-0.00127919	0.00386501	0.00374789	0.0028776	0.00401995	0.00361427	0.00403718	0.00306985	0.00330696	0.00323552	0.00550392	0.00474964	0.00359808
1.356	0.0055791	-0.00284111	-0.00486471	0.00173121	0.000575249	6.00378e-05	0.00170891	-0.00168031	0.00193245	-0.00088534	0.00317201	0.00364561	0.00286312	0.00429038	0.00379415	0.00399711	0.00300179	0.00341771	0.00327114	0.00526908	0.00479631	0.00348465
1.357	0.00586745	-0.00304993	-0.00478347	0.00165139	0.000871804	-0.000976549	0.00143378	-0.0013915	0.00164188	-0.000461266	0.00248961	0.00360804	0.00283991	0.00456908	0.00401814	0.00396282	0.00290101	0.0035673	0.00332699	0.00501017	0.00485145	0.00335027
1.358	0.00610641	-0.00336756	-0.00466615	0.00148725	0.00108857	-0.0020483	0.00107484	-0.0011136	0.00130884	-1.5401e-05	0.0018344	0.00365002	0.00281566	0.00483711	0.0042658	0.00393581	0.00277532	0.0037376	0.00339914	0.00474633	0.00491736	0.00320548
1.359	0.00629992	-0.0037826	-0.0045368	0.00126213	0.00122282	-0.00310827	0.000652459	-0.000854931	0.000937298	0.000442359	0.00122127	0.0037732	0.00279871	0.00507761	0.00451468	0.00391601	0.002635	0.0039098	0.00348848	0.0044951	0.00499366	0.00306287
1.36	0.006454	-0.00427656	-0.00442096	0.00100487	0.00127598	-0.00411019	0.00019207	-0.000623902	0.000533976	0.000901574	0.000662814	0.00396373	0.00279565	0.00527665	0.00474347	0.00390217	0.00249078	0.00406675	0.00359905	0.00427077	0.00507683	0.00293597
1.361	0.00657586	-0.00482519	-0.00434342	0.000747553	0.00125322	-0.00501152	-0.000277767	-0.000428729	0.00010809	0.0013522	0.000168925	0.004196	0.00280981	0.00542398	0.00493422	0.00389275	0.00235178	0.00419442	0.00373551	0.00408362	0.0051607	0.00283769
1.362	0.00667289	-0.00540035	-0.00432594	0.000523076	0.00116278	-0.00577628	-0.000727484	-0.000277187	-0.000329019	0.0017855	-0.000253509	0.00443971	0.00284096	0.00551363	0.00507373	0.00388718	0.00222407	0.00428282	0.00390042	0.00394018	0.00523774	0.00277828
1.363	0.00675165	-0.00597199	-0.0043852	0.000362636	0.00101514	-0.00637739	-0.00112871	-0.000176307	-0.000764418	0.00219475	-0.000600657	0.0046663	0.00288655	0.0055445	0.00515436	0.00388693	0.00211036	0.00432647	0.00409242	0.00384429	0.00530055	0.0027635
1.364	0.00681703	-0.00651144	-0.00453102	0.000292652	0.000821324	-0.0068014	-0.00145662	-0.000135415	-0.00118446	0.00257608	-0.000870973	0.00485309	0.0029435	0.00552078	0.00517315	0.00389638	0.00201133	0.00432383	0.004306	0.00379817	0.00534312	0.00279392
1.365	0.0068713	-0.00699202	-0.00476526	0.000336664	0.000594648	-0.00704006	-0.00169059	-0.000155297	-0.00157559	0.0029264	-0.00106737	0.00498541	0.00301036	0.00545183	0.00513411	0.00392131	0.00192713	0.00427941	0.00453131	0.0038011	0.00536347	0.00286508
1.366	0.00691313	-0.00738677	-0.00508288	0.000507243	0.000347819	-0.00710061	-0.00181601	-0.000239794	-0.00192329	0.00324972	-0.00119329	0.00505674	0.00308857	0.00535128	0.00504672	0.00396772	0.00186046	0.00420143	0.00475531	0.00385084	0.00536053	0.00296851
1.367	0.00693835	-0.00767714	-0.00546933	0.000808885	9.19255e-05	-0.00700019	-0.00182842	-0.000389049	-0.00221492	0.00354898	-0.00125429	0.00506901	0.00318232	0.00523625	0.00492344	0.0040404	0.0018187	0.00410131	0.00496496	0.00393987	0.00533726	0.00309479
1.368	0.00693988	-0.00785011	-0.00590334	0.0012378	-0.000163286	-0.00676538	-0.00173008	-0.000600922	-0.00244011	0.00383016	-0.00125662	0.00503101	0.00329621	0.00512491	0.00477886	0.0041403	0.00181317	0.00399194	0.00514808	0.00405487	0.00529848	0.00323514
1.369	0.00690813	-0.00789925	-0.00635793	0.00178176	-0.000409976	-0.00642992	-0.00153084	-0.000870703	-0.00259109	0.00410045	-0.00120674	0.00495658	0.00343346	0.00503357	0.00462809	0.00426309	0.00185577	0.00388606	0.0052946	0.00417714	0.00524984	0.00338259
1.37	0.00683182	-0.00782482	-0.00680234	0.00242095	-0.000642434	-0.0060319	-0.00124734	-0.00119107	-0.00266316	0.0043673	-0.00111064	0.00486222	0.00359396	0.00497373	0.00448517	0.00439932	0.001954	0.00379421	0.00539732	0.0042845	0.00519656	0.00353258
1.371	0.00669901	-0.00763336	-0.00720432	0.00312951	-0.000857123	-0.0056109	-0.000901772	-0.00155221	-0.00265499	0.00463746	-0.000973301	0.00476439	0.00377334	0.0049498	0.00436201	0.00453593	0.0021074	0.00372316	0.00545256	0.00435411	0.00514238	0.00368305
1.372	0.00649834	-0.00733685	-0.00753257	0.00387729	-0.00105258	-0.00520489	-0.000520169	-0.00194203	-0.00256872	0.00491612	-0.000798307	0.00467728	0.00396331	0.00495873	0.00426787	0.00465841	0.0023078	0.00367516	0.00546029	0.00436532	0.005089	0.00383431
1.373	0.00622024	-0.00695162	-0.00775907	0.00463194	-0.00122916	-0.00484745	-0.000130513	-0.00234657	-0.00240995	0.00520612	-0.000587568	0.0046113	0.00415299	0.00499151	0.00420951	0.00475316	0.00254263	0.00364832	0.0054242	0.00430218	0.00503617	0.0039885
1.374	0.00585752	-0.00649757	-0.00786165	0.0053611	-0.00138875	-0.00456629	0.000239166	-0.00275195	-0.00218802	0.00550775	-0.000340516	0.00457269	0.00433062	0.00503619	0.00419114	0.0048092	0.00279821	0.00363758	0.00535116	0.00415558	0.00498244	0.00414907
1.375	0.00540708	-0.00599617	-0.00782459	0.00603541	-0.00153472	-0.00437934	0.000562886	-0.00314295	-0.0019152	0.00581759	-5.52697e-05	0.00456447	0.00448456	0.00508071	0.0042143	0.0048192	0.00306162	0.00363656	0.00525045	0.00392446	0.00492563	0.0043191
1.376	0.0048719	-0.00546696	-0.00764001	0.00662867	-0.00167004	-0.00429257	0.000819141	-0.00350217	-0.0016047	0.00613004	0.000269474	0.0045883	0.00460628	0.00511483	0.00427876	0.00478059	0.00332308	0.00363984	0.00513355	0.00361726	0.00486306	0.00450003
1.377	0.00425843	-0.0049302	-0.00731076	0.0071189	-0.00179793	-0.00430379	0.000989839	-0.00381416	-0.00127023	0.00643545	0.000636742	0.00464499	0.00469002	0.00513188	0.00438042	0.00469515	0.00357515	0.00364189	0.00501227	0.00325285	0.00479405	0.00469177
1.378	0.0035782	-0.0044032	-0.00684763	0.00749168	-0.0019218	-0.00440022	0.00106361	-0.00406477	-0.000927259	0.00672267	0.00104974	0.00473439	0.00473262	0.00512874	0.00451063	0.00456834	0.00381192	0.00363732	0.00489729	0.00286224	0.00471853	0.00489134
1.379	0.00284699	-0.00390003	-0.00626938	0.00773974	-0.00204436	-0.00456003	0.00103566	-0.00424228	-0.000591067	0.00697939	0.00151104	0.00485464	0.00473375	0.0051053	0.00465686	0.00440863	0.00402922	0.00362069	0.0047968	0.00249073	0.00463706	0.00509303
1.38	0.00208394	-0.00343096	-0.00560153	0.00786306	-0.00216725	-0.00475414	0.000907753	-0.00433806	-0.000275874	0.00719303	0.00202188	0.00500102	0.00469564	0.00506353	0.00480408	0.0042267	0.00422454	0.00358623	0.00471565	0.00219818	0.00455039	0.00528902
1.381	0.00131038	-0.00300223	-0.00487448	0.00786852	-0.00229078	-0.00494848	0.000687804	-0.00434722	5.95268e-06	0.00735184	0.00258151	0.00516527	0.00462266	0.00500665	0.00493684	0.00403475	0.00439706	0.00352798	0.00465504	0.00204693	0.00445906	0.00547034
1.382	0.000548483	-0.0026161	-0.00412141	0.007769	-0.00241373	-0.00510671	0.000389084	-0.00426902	0.000244558	0.00744592	0.00318667	0.00533586	0.00452093	0.0049384	0.00504163	0.00384612	0.00454782	0.00344046	0.00461308	0.00206724	0.00436337	0.00562796
1.383	-0.000180217	-0.00227117	-0.00337601	0.00758224	-0.00253333	-0.00519301	2.90862e-05	-0.00410711	0.000433114	0.00746812	0.00383127	0.00549915	0.00439799	0.00486261	0.00510893	0.00367517	0.0046799	0.00331967	0.00458579	0.00223021	0.0042637	0.00575399
1.384	-0.000856207	-0.00196299	-0.00267014	0.0073294	-0.00264531	-0.00517481	-0.000371802	-0.00386939	0.000568134	0.00741471	0.00450623	0.00564122	0.00426248	0.00478307	0.00513474	0.00353699	0.00479842	0.00316446	0.00456822	0.0024719	0.00416114	0.00584248
1.385	-0.00146598	-0.00168506	-0.00203308	0.00703323	-0.00274476	-0.00502727	-0.000789781	-0.00357155	0.000648485	0.00728488	0.00519976	0.0057487	0.00412321	0.00470367	0.00512052	0.0034457	0.00491009	0.00297786	0.00455474	0.00273292	0.00405866	0.00589025
1.386	-0.00199481	-0.00142714	-0.00148599	0.00671782	-0.00282454	-0.00473099	-0.00120507	-0.00322583	0.000678407	0.00708283	0.00589647	0.00581287	0.00399066	0.0046272	0.00507432	0.00341433	0.00502279	0.00276877	0.00454044	0.00297659	0.00395995	0.00589554
1.387	-0.00243488	-0.00118226	-0.00104418	0.00640433	-0.00287744	-0.00427479	-0.00159691	-0.00284834	0.000664474	0.00681727	0.00658074	0.00582808	0.00387497	0.00455628	0.00500936	0.00345032	0.00514363	0.00255172	0.00452072	0.00318366	0.00387293	0.00586204
1.388	-0.0027838	-0.000942009	-0.000715315	0.00611202	-0.00289627	-0.00365934	-0.00194748	-0.00245741	0.000615619	0.00649935	0.00723514	0.00579287	0.00378502	0.00449231	0.00493991	0.00355228	0.0052776	0.00234781	0.00449037	0.00334889	0.00380691	0.00579491
1.389	-0.00304404	-0.000698982	-0.000499203	0.00585643	-0.00287429	-0.00289572	-0.00224234	-0.0020715	0.000542543	0.00614272	0.00784208	0.00570971	0.00372774	0.00443473	0.00487848	0.00370955	0.00542632	0.00218238	0.00444357	0.00347585	0.0037714	0.00570123
1.39	-0.00322235	-0.00044754	-0.000388222	0.00564862	-0.00280586	-0.00200481	-0.00247103	-0.00170797	0.000456975	0.00576244	0.00838473	0.00558448	0.00370717	0.00438053	0.00483242	0.00390412	0.00558731	0.00207912	0.00437396	0.00357321	0.00377385	0.0055892
1.391	-0.00332885	-0.000184291	-0.000368274	0.00549469	-0.0026869	-0.00101603	-0.00262738	-0.00138184	0.000370807	0.00537389	0.00884803	0.00542576	0.00372407	0.00432425	0.00480174	0.00411397	0.0057541	0.00205055	0.00427512	0.00365155	0.00381729	0.00546724
1.392	-0.0033759	9.16149e-05	-0.000420184	0.00539576	-0.00251538	3.45441e-05	-0.00270951	-0.00110481	0.000295212	0.00499158	0.00921958	0.00524423	0.00377604	0.00425858	0.00477914	0.00431659	0.00591715	0.00209081	0.00414156	0.00372094	0.0038991	0.00534319
1.393	-0.00337683	0.000378392	-0.000521415	0.00534826	-0.00229169	0.00110638	-0.00271956	-0.000884425	0.000239815	0.00462816	0.00949036	0.00505217	0.00385835	0.00417553	0.00475218	0.00449163	0.00606523	0.00217782	0.00396994	0.00378938	0.00401121	0.00522355
1.394	-0.0033447	0.00067174	-0.000647965	0.0053445	-0.00201886	0.0021571	-0.00266327	-0.000723597	0.000211963	0.00429348	0.00965529	0.00486306	0.00396487	0.00406785	0.00470689	0.00462269	0.00618699	0.00228307	0.00376033	0.00386224	0.00414181	0.00511305
1.395	-0.00329168	0.000964558	-0.00077685	0.00537283	-0.0017037	0.00314438	-0.0025489	-0.000621298	0.000214997	0.00399404	0.00971299	0.00469046	0.00408868	0.00393055	0.00463081	0.004698	0.00627223	0.00238041	0.00351714	0.00394204	0.00427723	0.00501432
1.396	-0.003227	0.00124974	-0.00088752	0.00541976	-0.00135429	0.00402864	-0.00238694	-0.000573189	0.000251513	0.00373318	0.00966536	0.0045488	0.00422276	0.00376066	0.0045166	0.00471155	0.00631267	0.00245206	0.00324962	0.0040307	0.00440487	0.00492751
1.397	-0.00315584	0.00151784	-0.000961305	0.00547193	-0.000980432	0.00477944	-0.00219056	-0.000565608	0.000319691	0.0035095	0.0095208	0.00445083	0.00436021	0.00356079	0.00436363	0.00466393	0.00630365	0.00248661	0.00297359	0.00412922	0.00451447	0.0048518
1.398	-0.00308104	0.00175879	-0.000985233	0.00551559	-0.000594157	0.0053728	-0.00197317	-0.000583945	0.000413597	0.00331844	0.00929056	0.00440456	0.00449373	0.0033377	0.00417737	0.00456047	0.0062431	0.00247997	0.00270903	0.0042376	0.0045979	0.00478441
1.399	-0.00300233	0.00196313	-0.000952555	0.00553818	-0.000208562	0.0057932	-0.00174845	-0.000612458	0.000524558	0.00315281	0.00898792	0.00441153	0.00461568	0.00310173	0.00396912	0.00441085	0.0061318	0.00243445	0.00247762	0.00435482	0.00464992	0.00472088
1.4	-0.00291663	0.0021225	-0.000862606	0.00552937	0.000162876	0.00603506	-0.00152971	-0.000634784	0.000641315	0.00300349	0.00862765	0.00446594	0.00471814	0.00286635	0.00375454	0.00422789	0.00597346	0.00235767	0.00229794	0.00447809	0.00466816	0.00465558
1.401	-0.00281864	0.00223026	-0.000720616	0.00548172	0.000507069	0.00610293	-0.00132927	-0.000635305	0.000750729	0.00286048	0.00822489	0.00455565	0.00479337	0.0026469	0.00355159	0.00402611	0.00577473	0.00226183	0.00217862	0.00460234	0.00465293	0.00458205
1.402	-0.00270173	0.00228212	-0.00053709	0.00539116	0.000812076	0.00601109	-0.00115809	-0.000600472	0.000838628	0.00271397	0.00779404	0.00466486	0.00483438	0.00245862	0.00337826	0.00381994	0.0055451	0.00216306	0.00211359	0.00472024	0.0046069	0.00449364
1.403	-0.00255892	0.00227654	-0.00032682	0.00525714	0.00106782	0.00578239	-0.0010254	-0.000520009	0.000890746	0.00255539	0.00734764	0.00477729	0.00483572	0.00231407	0.00325016	0.00362218	0.00529692	0.00208029	0.00208372	0.00482301	0.00453487	0.00438421
1.404	-0.00238386	0.00221499	-0.000107605	0.00508255	0.00126666	0.00544672	-0.00093843	-0.000387866	0.000893699	0.00237831	0.00689556	0.00487898	0.00479413	0.00222028	0.0031785	0.00344273	0.00504515	0.00203281	0.00206469	0.00490171	0.00444338	0.00424884
1.405	-0.0021717	0.00210183	0.000100988	0.00487316	0.00140351	0.00503889	-0.00090182	-0.000203425	0.000835575	0.0021789	0.00644404	0.00496007	0.00470894	0.00217696	0.00316895	0.00328792	0.00480666	0.00203608	0.00203552	0.00494869	0.00434025	0.00408447
1.406	-0.00191943	0.00194429	0.000278298	0.00463643	0.00147528	0.00459546	-0.000916072	2.63459e-05	0.000706527	0.00195734	0.00599457	0.00501545	0.00458198	0.00217695	0.00322136	0.00316052	0.0045983	0.00209707	0.00198397	0.00495873	0.00423388	0.00388987
1.407	-0.00162689	0.00175326	0.000407566	0.00438249	0.00148564	0.0041532	-0.000984874	0.000295234	0.000503278	0.0017174	0.00554608	0.00504505	0.0044192	0.00220866	0.00333082	0.00306169	0.00443445	0.00221167	0.00190929	0.00493252	0.00413182	0.00366888
1.408	-0.00129809	0.0015406	0.000474401	0.00412211	0.00143902	0.00374847	-0.00110517	0.000591517	0.000223765	0.00146434	0.00509598	0.00505165	0.00422852	0.00225993	0.00348785	0.00299049	0.00432498	0.00236595	0.00182114	0.00487532	0.00404022	0.00342826
1.409	-0.000939494	0.00132004	0.000467442	0.00386552	0.00134319	0.0034115	-0.00127269	0.000898088	-0.000129252	0.00120613	0.00463728	0.0050397	0.00401961	0.00231961	0.00367934	0.00294497	0.00427027	0.00254108	0.0017385	0.00479743	0.00396245	0.00317802
1.41	-0.000560237	0.00110598	0.000379917	0.00362158	0.00120808	0.00316572	-0.00148087	0.00119524	-0.000548748	0.000952302	0.00416098	0.00501351	0.00380345	0.00237894	0.00388905	0.00292218	0.00426101	0.0027174	0.00168452	0.00471344	0.0038982	0.00293164
1.411	-0.000171426	0.00091264	0.000210108	0.00339689	0.00104502	0.00302619	-0.00172106	0.00146209	-0.00102364	0.00071309	0.0036572	0.00497591	0.00359188	0.00243207	0.00409865	0.00291784	0.00428012	0.00287704	0.00167783	0.00464027	0.00384348	0.00270559
1.412	0.000214659	0.000753129	-3.85309e-05	0.0031951	0.000865944	0.00299868	-0.0019827	0.00167805	-0.00153927	0.000498441	0.00311624	0.00492747	0.00339757	0.00247634	0.00428916	0.00292613	0.00430671	0.0030054	0.00172341	0.00459433	0.00379151	0.00251797
1.413	0.000585516	0.000638652	-0.000357608	0.00301642	0.000682501	0.00307926	-0.00225371	0.0018244	-0.00207805	0.00031711	0.00252982	0.00486677	0.00323414	0.0025126	0.00444277	0.00293988	0.00432046	0.00309202	0.00181002	0.00458812	0.00373423	0.00238581
1.414	0.000929374	0.000577763	-0.000734343	0.00285742	0.000505248	0.0032547	-0.00252094	0.00188566	-0.00262043	0.000175863	0.00189206	0.00479146	0.00311602	0.0025454	0.00454482	0.00295149	0.00430519	0.00313123	0.00191667	0.00462747	0.00366431	0.00232092
1.415	0.00123608	0.000575797	-0.00115239	0.00271115	0.000342954	0.00350341	-0.00277074	0.00185077	-0.00314584	7.88915e-05	0.00120042	0.00469971	0.00305728	0.00258273	0.00458568	0.00295418	0.00425112	0.00312266	0.00202188	0.00471039	0.00357689	0.00232599
1.416	0.00149847	0.000633732	-0.00159377	0.00256779	0.000202157	0.00379846	-0.00298819	0.00171181	-0.00363506	2.97614e-05	0.000456853	0.0045912	0.00306847	0.00263487	0.0045622	0.00294265	0.00415573	0.00307105	0.00210922	0.00482792	0.00347066	0.00239372
1.417	0.00171333	0.000749311	-0.00203544	0.00241419	8.54692e-05	0.00410434	-0.00316351	0.00146828	-0.00406816	2.66379e-05	-0.000336654	0.00446869	0.00315343	0.00271168	0.00447945	0.00291592	0.00402333	0.00298767	0.00217124	0.0049665	0.0033496	0.00250957
1.418	0.00187678	0.000917696	-0.00245834	0.00223696	-5.05911e-06	0.004386	-0.00328508	0.00112933	-0.0044276	6.3828e-05	-0.00116691	0.0043378	0.00330679	0.00281846	0.00434994	0.00287598	0.00386719	0.00288731	0.00220884	0.00511246	0.00322261	0.00265712
1.419	0.00198946	0.00113025	-0.00284342	0.00202229	-7.06204e-05	0.00460851	-0.00334433	0.00070687	-0.00469974	0.000134325	-0.00201942	0.00420523	0.0035143	0.00295448	0.00419437	0.00282845	0.00370473	0.00278752	0.00222929	0.00525264	0.00310275	0.00282089
1.42	0.00205489	0.00137567	-0.00317373	0.00175742	-0.00011459	0.00473984	-0.00333595	0.000217494	-0.00487506	0.000229741	-0.00287656	0.00407781	0.00375571	0.00311204	0.0040393	0.0027814	0.00355552	0.00270535	0.00224386	0.00537629	0.00300561	0.00298781
1.421	0.00207881	0.00164079	-0.00343542	0.00143188	-0.000141927	0.00475336	-0.00325828	-0.000318487	-0.00494866	0.00034123	-0.00371815	0.00396114	0.00400851	0.00327799	0.0039132	0.00274364	0.00343726	0.00265345	0.00226441	0.00547574	0.00294633	0.00314719
1.422	0.00206858	0.00191147	-0.00361854	0.0010386	-0.000158493	0.00462999	-0.00311374	-0.000878326	-0.00492054	0.000460531	-0.00452262	0.00385904	0.00425121	0.00343661	0.00384021	0.00272271	0.00336132	0.0026368	0.00229967	0.0055464	0.00293611	0.0032902
1.423	0.00203244	0.0021736	-0.00371746	0.000574833	-0.0001703	0.00435972	-0.0029089	-0.0014383	-0.00479559	0.000580958	-0.0052681	0.00377425	0.00446561	0.00357273	0.00383358	0.00272311	0.00332961	0.00265193	0.00235268	0.00558657	0.0029793	0.00340941
1.424	0.00197874	0.00241401	-0.00373109	4.27881e-05	-0.000182773	0.00394262	-0.00265438	-0.0019752	-0.00458328	0.000698229	-0.00593371	0.00371044	0.00463839	0.00367427	0.00389188	0.00274552	0.00333453	0.00268923	0.00242058	0.00559704	0.00307277	0.00349847
1.425	0.00191531	0.00262142	-0.00366287	-0.000550073	-0.000200071	0.00338908	-0.00236434	-0.00246778	-0.00429704	0.000811044	-0.00650065	0.00367455	0.00476194	0.0037341	0.00400076	0.00278733	0.00336208	0.00273713	0.0024968	0.00558084	0.00320782	0.00355213
1.426	0.00184932	0.00278794	-0.00352003	-0.00119043	-0.000223405	0.00272056	-0.00205403	-0.00289812	-0.00395337	0.000923191	-0.00695212	0.00367803	0.00483429	0.00375122	0.00413896	0.00284394	0.00339649	0.00278581	0.00257426	0.00554272	0.00337299	0.00356687
1.427	0.00178598	0.00290728	-0.00331317	-0.00186106	-0.00025461	0.00196526	-0.00174328	-0.00325362	-0.00357093	0.00103976	-0.00727897	0.00373597	0.00485926	0.00373045	0.00428507	0.0029107	0.00342371	0.0028302	0.00264859	0.00548888	0.00355762	0.0035393
1.428	0.00172834	0.00297733	-0.00305632	-0.00254242	-0.000292609	0.00115737	-0.00145337	-0.00352501	-0.00316961	0.00116691	-0.00747388	0.00386307	0.00484528	0.00368152	0.00442247	0.00298495	0.00343435	0.00286935	0.00272018	0.00542745	0.00375299	0.00346792
1.429	0.00167755	0.00299991	-0.00276716	-0.00321024	-0.000332459	0.000337956	-0.00120227	-0.00370795	-0.00276873	0.00131352	-0.00753266	0.00406662	0.00480371	0.00361791	0.0045407	0.00306567	0.00342349	0.00290548	0.00279358	0.00536702	0.00395155	0.00335325
1.43	0.00163323	0.00298056	-0.00246341	-0.00383936	-0.000367768	-0.000450631	-0.001006	-0.00380408	-0.00238653	0.00148907	-0.00745756	0.00434217	0.00474593	0.00355371	0.00463492	0.00315308	0.00338994	0.00294229	0.00287584	0.00531591	0.00414701	0.00319742
1.431	0.00159364	0.00292797	-0.00216297	-0.00440492	-0.000390754	-0.00116701	-0.000877057	-0.00381995	-0.00203875	0.0017023	-0.00725532	0.00467266	0.00468092	0.00350044	0.00470447	0.003248	0.00333569	0.00298273	0.00297402	0.00528155	0.00433349	0.00300465
1.432	0.00155622	0.00285324	-0.00188287	-0.00488406	-0.000392971	-0.0017736	-0.000823251	-0.00376638	-0.00173777	0.00195997	-0.0069366	0.00503176	0.00461326	0.0034644	0.00475088	0.00335092	0.00326528	0.00302741	0.00309221	0.00526966	0.00450491	0.00278189
1.433	0.00151807	0.00276897	-0.00163828	-0.00525743	-0.000366119	-0.00223928	-0.00084701	-0.0036575	-0.00149188	0.00226569	-0.00651527	0.00538865	0.00454239	0.00344579	0.00477604	0.00346133	0.00318575	0.00307421	0.00322938	0.00528362	0.00465486	0.00253968
1.434	0.00147657	0.00268831	-0.00144172	-0.00551061	-0.000302876	-0.00254147	-0.000944968	-0.00350965	-0.00130485	0.00261898	-0.0060075	0.00571256	0.00446341	0.00344014	0.00478095	0.00357758	0.00310719	0.00311911	0.00337907	0.00532407	0.0047769	0.00229369
1.435	0.00142986	0.00262386	-0.00130232	-0.00563514	-0.000197661	-0.00266777	-0.00110801	-0.00334012	-0.00117586	0.00301463	-0.00543091	0.00597611	0.00436918	0.00344155	0.00476527	0.00369724	0.00304349	0.0031578	0.00353066	0.00538889	0.00486503	0.00206641
1.436	0.00137783	0.0025875	-0.00122446	-0.0056295	-4.62758e-05	-0.00261652	-0.00132137	-0.00316603	-0.00109942	0.0034432	-0.00480286	0.00615747	0.00425273	0.00344655	0.00472775	0.00381765	0.00301242	0.00318746	0.00367177	0.00547353	0.00491418	0.00188829
1.437	0.00132264	0.00258693	-0.00120959	-0.00549601	0.000150147	-0.00239579	-0.00156666	-0.00300246	-0.00106581	0.00389125	-0.00414088	0.00624206	0.0041101	0.00345639	0.00466546	0.00393619	0.0030338	0.0032074	0.0037902	0.00557051	0.00492086	0.00179236
1.438	0.00126249	0.00262668	-0.00125431	-0.00525018	0.00038626	-0.00202813	-0.00182388	-0.00286541	-0.00106448	0.00433679	-0.00346511	0.00622255	0.00394226	0.00347864	0.0045803	0.00405097	0.00312382	0.00322082	0.00387622	0.0056723	0.00488487	0.00180101
1.439	0.00120259	0.00270974	-0.00135297	-0.00490834	0.000658949	-0.00154105	-0.00206874	-0.00276274	-0.00108065	0.00475903	-0.00278771	0.00609962	0.00375484	0.00352212	0.00447545	0.00416105	0.00328924	0.00323201	0.00392448	0.00577062	0.00480763	0.0019122
1.44	0.00114746	0.00283449	-0.00149534	-0.00449311	0.00096032	-0.000969532	-0.00227846	-0.00270003	-0.00109993	0.00513508	-0.00212192	0.00588111	0.00355837	0.00359666	0.00435672	0.00426504	0.00352468	0.00324649	0.00393345	0.00585628	0.00469283	0.00209931
1.441	0.00110229	0.00299581	-0.00166838	-0.0040305	0.0012804	-0.000352364	-0.00243254	-0.00267858	-0.00110851	0.00544252	-0.00147879	0.00558122	0.00336693	0.00370719	0.00423282	0.00436105	0.00381336	0.00326862	0.00390585	0.0059203	0.00454587	0.00232682
1.442	0.00107244	0.00318544	-0.00185709	-0.00354824	0.00160778	0.000270744	-0.00251451	-0.00269545	-0.0010942	0.00566114	-0.000867124	0.00521916	0.00319612	0.0038505	0.00411453	0.00444615	0.00413134	0.00330008	0.00384824	0.00595449	0.00437319	0.002563
1.443	0.0010629	0.00339269	-0.00204544	-0.003074	0.00193039	0.000862136	-0.00251345	-0.00274368	-0.0010475	0.00577473	-0.000293453	0.0048175	0.00306063	0.00401499	0.00401327	0.00451625	0.00445237	0.00333943	0.00377008	0.00595228	0.00418155	0.00278436
1.444	0.00107774	0.00360532	-0.00221747	-0.0026336	0.00223624	0.00138898	-0.00242515	-0.00281284	-0.00096233	0.00577258	0.000237782	0.00440033	0.00297183	0.0041833	0.00393928	0.00456624	0.0047516	0.00338283	0.0036826	0.00590937	0.00397742	0.00297574
1.445	0.00111967	0.00381054	-0.00235831	-0.00224943	0.00251427	0.00182563	-0.00225271	-0.00288971	-0.000836503	0.00565064	0.000724015	0.00399123	0.0029362	0.00433641	0.0038998	0.00459062	0.00500797	0.00342592	0.00359728	0.00582455	0.00376658	0.0031295
1.446	0.00119057	0.00399712	-0.00245443	-0.00193945	0.00275563	0.00215604	-0.00200592	-0.00295891	-0.000671	0.00541251	0.00116408	0.00361088	0.00295465	0.00445758	0.0038977	0.00458435	0.00520591	0.00346574	0.00352416	0.00570027	0.00355389	0.00324475
1.447	0.00128952	0.00415373	-0.00249613	-0.00171395	0.00295232	0.00237345	-0.00170268	-0.0030033	-0.000471394	0.00506953	0.00155889	0.00327571	0.00302498	0.00453458	0.00393136	0.00454333	0.00533579	0.00350229	0.00347072	0.00554216	0.00334381	0.00332619
1.448	0.00141116	0.00427118	-0.00247829	-0.00157925	0.00309696	0.00248006	-0.0013664	-0.00300866	-0.000247801	0.00463758	0.0019089	0.00299569	0.00314199	0.00456296	0.00399578	0.00446592	0.00539392	0.00353987	0.00344066	0.00535937	0.00314085	0.00338353
1.449	0.00155107	0.00434452	-0.00239873	-0.00153498	0.00318827	0.00248914	-0.00102392	-0.00295964	-1.18553e-05	0.00413985	0.00221685	0.00277379	0.00329723	0.00454415	0.00408393	0.00435293	0.0053829	0.0035851	0.00343497	0.00516476	0.00295033	0.00342978
1.45	0.00170315	0.0043727	-0.00225939	-0.00157399	0.00322777	0.00242226	-0.000704303	-0.00284181	0.000223027	0.00360469	0.00248525	0.00260591	0.00348026	0.00448567	0.0041871	0.00420804	0.00531103	0.00364567	0.00345213	0.00497173	0.00277828	0.0034778
1.451	0.00185927	0.00435844	-0.00206655	-0.0016842	0.00321881	0.0023068	-0.000436501	-0.00264347	0.000442584	0.0030623	0.002716	0.00248257	0.00367863	0.0043995	0.00429615	0.00403789	0.00519108	0.00372778	0.00348962	0.00479245	0.00263109	0.00353767
1.452	0.00201044	0.00430822	-0.0018302	-0.00184952	0.00316673	0.00217383	-0.000246889	-0.00235573	0.000633254	0.00254306	0.00291077	0.00239157	0.00387826	0.00429894	0.00440218	0.00385154	0.00503885	0.00383348	0.00354564	0.00463582	0.00251458	0.00361441
1.453	0.0021474	0.00423185	-0.00156341	-0.00205127	0.00307832	0.00205536	-0.000157031	-0.00197299	0.000783401	0.00207507	0.00307083	0.00232056	0.00406463	0.00419531	0.004497	0.00365983	0.0048714	0.00395941	0.00362031	0.00450564	0.0024326	0.00370694
1.454	0.00226124	0.00414168	-0.00128143	-0.00226973	0.00296108	0.00198144	-0.000181742	-0.00149317	0.000884406	0.0016821	0.00319698	0.0022587	0.0042245	0.00409502	0.00457358	0.00347436	0.00470519	0.0040973	0.00371609	0.00439998	0.00238572	0.0038089
1.455	0.00234398	0.00405165	-0.00100062	-0.00248568	0.00282256	0.00197761	-0.000327642	-0.000917812	0.000931523	0.0013816	0.00328947	0.00219766	0.00434794	0.00399798	0.00462662	0.00330627	0.00455426	0.00423585	0.00383732	0.00431204	0.00237088	0.00391075
1.456	0.00238908	0.00397724	-0.000736697	-0.00268205	0.00266995	0.00206275	-0.000591706	-0.000251501	0.000925287	0.00118372	0.00334822	0.00213226	0.00442988	0.00389835	0.00465312	0.00316493	0.00442872	0.00436312	0.00398887	0.00423235	0.00238219	0.00400246
1.457	0.00239209	0.0039314	-0.000504918	-0.0028445	0.00250899	0.00224697	-0.000962918	0.000497124	0.000869377	0.00108976	0.00337258	0.0020611	0.00447229	0.00378617	0.00465288	0.0030566	0.00433381	0.00446906	0.00417451	0.0041509	0.00241335	0.00407571
1.458	0.00235072	0.00392549	-0.00031816	-0.00296277	0.00234292	0.00253046	-0.00142179	0.00131596	0.000771288	0.00109222	0.00336147	0.00198749	0.00448447	0.00365084	0.00462831	0.00298366	0.0042696	0.00454697	0.00439474	0.00405926	0.00245902	0.00412562
1.459	0.00226465	0.00396834	-0.000187647	-0.0030323	0.00217328	0.00290575	-0.00193946	0.002191	0.000643476	0.00117366	0.00331134	0.00192074	0.00448217	0.00348576	0.00458622	0.00294443	0.00423233	0.00459463	0.00464643	0.00395296	0.00251886	0.00415071
1.46	0.00213822	0.00406423	-0.000117913	-0.00305157	0.00200315	0.00335563	-0.00248374	0.00310622	0.000502853	0.00131352	0.00322072	0.00187532	0.0044852	0.00328857	0.00453647	0.00293427	0.00421468	0.00461332	0.00492328	0.0038316	0.00259516	0.00415322
1.461	0.00197686	0.00421342	-0.000109619	-0.00302432	0.00183251	0.00385545	-0.00301914	0.00404422	0.000366827	0.00148504	0.00308652	0.00186851	0.00451354	0.00306312	0.00448974	0.00294619	0.00420706	0.00460803	0.00521534	0.00369778	0.00269238	0.00413857
1.462	0.00178817	0.00441143	-0.000158686	-0.00295824	0.00166028	0.00437522	-0.00351003	0.00498678	0.000253257	0.00165887	0.00290556	0.00191541	0.00458218	0.00281925	0.00445655	0.00297204	0.00419867	0.00458599	0.00551091	0.00355662	0.00281576	0.00411429
1.463	0.00158157	0.00464916	-0.000256526	-0.002864	0.00148473	0.00488206	-0.00392333	0.00591556	0.000179065	0.0018056	0.00267487	0.00202277	0.00469666	0.00257173	0.00444536	0.00300345	0.0041785	0.00455518	0.00579801	0.00341473	0.00296914	0.00408886
1.464	0.00136785	0.00491329	-0.000390602	-0.00275424	0.00130395	0.00534292	-0.00423118	0.0068127	0.000158891	0.0018983	0.00239206	0.00218603	0.00485164	0.0023381	0.00446105	0.00303234	0.00413644	0.00452288	0.00606562	0.00327929	0.00315329	0.00407075
1.465	0.00115862	0.00518705	-0.000545287	-0.00264233	0.00111633	0.00572729	-0.00441315	0.00766143	0.000203907	0.00191492	0.00205583	0.00239172	0.00503285	0.00213549	0.00450426	0.00305129	0.00406433	0.00449451	0.00630475	0.00315732	0.0033651	0.00406761
1.466	0.000966002	0.00545218	-0.000702987	-0.00254167	0.00092078	0.00601006	-0.00445734	0.00844708	0.00032162	0.00184062	0.0016671	0.0026226	0.00522089	0.00197658	0.00457188	0.00305387	0.00395712	0.00447282	0.00650893	0.00305551	0.00359785	0.00408603
1.467	0.000801175	0.00568781	-0.000845426	-0.00246339	0.000717529	0.00617262	-0.00436283	0.00915653	0.000513429	0.00166831	0.00122773	0.00286188	0.0053974	0.00186616	0.00465808	0.00303502	0.00381366	0.00445828	0.00667453	0.00297972	0.00384253	0.00413098
1.468	0.000672424	0.00587426	-0.000953684	-0.0024175	0.000508447	0.00620459	-0.00414032	0.0097785	0.000774801	0.00139916	0.000741592	0.00309563	0.00554789	0.00180027	0.00475496	0.0029913	0.00363726	0.00444844	0.00679973	0.00293451	0.00408857	0.00420628
1.469	0.000591226	0.00599431	-0.00101394	-0.00240844	0.000294045	0.00610695	-0.00380571	0.010307	0.00109524	0.00104314	0.000215849	0.00331358	0.00566219	0.00177026	0.00485504	0.00292088	0.00343641	0.00444051	0.00688531	0.00292257	0.0043268	0.00431339
1.47	0.000565067	0.00603007	-0.00101317	-0.00243753	7.97585e-05	0.00588708	-0.00338753	0.0107368	0.00146342	0.000621872	-0.000339956	0.00350964	0.00573655	0.00176762	0.00495375	0.0028266	0.00322503	0.00443066	0.00693449	0.00294396	0.00454721	0.00445083
1.471	0.000598286	0.00596956	-0.000942483	-0.00250251	-0.000129123	0.00556236	-0.00291934	0.0110661	0.00186304	0.000162478	-0.000913462	0.00368111	0.00577209	0.00178788	0.00504607	0.00271406	0.00301995	0.0044141	0.00695093	0.00299462	0.00474163	0.00461476
1.472	0.000692382	0.00580596	-0.000797711	-0.0025975	-0.000326753	0.00515751	-0.00243816	0.0112962	0.00227516	-0.000303133	-0.00148975	0.00382823	0.00577338	0.00183122	0.00512738	0.0025926	0.00283861	0.00438571	0.00693867	0.00306679	0.00490358	0.00479851
1.473	0.000845826	0.00553796	-0.000579719	-0.00271347	-0.00050696	0.00470246	-0.00198171	0.0114315	0.00267978	-0.000740564	-0.00205177	0.00395341	0.00574653	0.00189986	0.00519325	0.00247541	0.00269514	0.00434045	0.00690172	0.00315023	0.00502822	0.00499292
1.474	0.00105406	0.00516994	-0.000294372	-0.00283891	-0.000663681	0.00422991	-0.00158554	0.0114782	0.00305713	-0.00111567	-0.00258091	0.00406038	0.00569726	0.0019942	0.00523914	0.00237864	0.0025963	0.00427383	0.00684405	0.00323412	0.00511234	0.0051871
1.475	0.00130963	0.00471178	4.78616e-05	-0.00296072	-0.000791367	0.00377272	-0.00128022	0.0114449	0.003389	-0.00139736	-0.00305778	0.0041533	0.0056294	0.00211015	0.00526045	0.00231899	0.00253925	0.00418268	0.00676967	0.00330919	0.00515421	0.00536954
1.476	0.0016027	0.00417869	0.000432702	-0.00306572	-0.000885223	0.00336163	-0.0010888	0.0113421	0.00366016	-0.0015595	-0.00346223	0.00423592	0.00554397	0.00223874	0.00525312	0.00230973	0.00251337	0.00406603	0.00668293	0.0033696	0.00515338	0.00552961
1.477	0.00192088	0.0035895	0.000842886	-0.00314004	-0.00094189	0.00302237	-0.00102547	0.0111801	0.00385863	-0.0015847	-0.00377648	0.00431103	0.00543973	0.00236803	0.00521366	0.00235636	0.00250478	0.00392618	0.00658841	0.00341374	0.00511087	0.00565777
1.478	0.00224934	0.00296623	0.00126074	-0.00317196	-0.000958988	0.0027741	-0.00109499	0.0109688	0.00397646	-0.00146625	-0.00398522	0.00437955	0.00531382	0.00248567	0.00513957	0.00245449	0.00250161	0.00376908	0.00649031	0.00344483	0.00502891	0.00574719
1.479	0.00257282	0.00233411	0.00166785	-0.00315157	-0.000936685	0.00262924	-0.00129137	0.0107183	0.00400939	-0.00120799	-0.00407573	0.00444046	0.00516252	0.00258098	0.00503049	0.00259109	0.0024977	0.00360522	0.00639229	0.00347006	0.0049111	0.00579378
1.48	0.00287807	0.00171563	0.002044	-0.00306758	-0.000875679	0.00259115	-0.00159801	0.0104392	0.00395961	-0.000820242	-0.00403814	0.0044924	0.00498313	0.00264667	0.0048898	0.0027505	0.00249416	0.00344984	0.00629838	0.00349795	0.00476273	0.00579525
1.481	0.00315053	0.00113115	0.00237372	-0.00291333	-0.000775868	0.00265357	-0.00199134	0.0101386	0.00383389	-0.000324067	-0.00386747	0.00453217	0.00477474	0.00268023	0.00472291	0.00291774	0.00249692	0.0033194	0.00621013	0.00353604	0.00459059	0.00575244
1.482	0.00337662	0.000600014	0.00264518	-0.00268515	-0.000638851	0.00280376	-0.00244148	0.00982275	0.00364197	0.000250306	-0.00356388	0.00455518	0.004538	0.00268368	0.00453709	0.00307972	0.00251365	0.00322904	0.006126	0.00358824	0.0044031	0.00566795
1.483	0.00354453	0.000137844	0.00285091	-0.00238227	-0.000466595	0.00302278	-0.00291514	0.00949575	0.00339623	0.000866429	-0.0031327	0.00455622	0.00427545	0.00266331	0.00434109	0.00322697	0.00254983	0.00318829	0.00604157	0.00365284	0.00421023	0.00554539
1.484	0.00364487	-0.000244274	0.00298826	-0.00200669	-0.000261167	0.00328728	-0.0033785	0.00915967	0.00311064	0.00148417	-0.00258435	0.00453015	0.00399133	0.00262876	0.00414435	0.00335389	0.00260562	0.00319801	0.00595001	0.00372251	0.00402313	0.0053887
1.485	0.00367114	-0.000540313	0.00305942	-0.00156304	-2.45095e-05	0.00357157	-0.00380004	0.00881465	0.00279964	0.00206254	-0.00193397	0.00447269	0.00369145	0.0025918	0.0039562	0.00345845	0.00267499	0.00325015	0.00584333	0.0037861	0.00385345	0.0052016
1.486	0.00362085	-0.000749496	0.00307098	-0.00105882	0.000241793	0.00385032	-0.00415328	0.00845999	0.00247738	0.00256295	-0.00120039	0.00438104	0.00338323	0.00256464	0.00378522	0.00354162	0.00274779	0.00333083	0.00571393	0.00383159	0.00371195	0.0049873
1.487	0.00349368	-0.000875928	0.00303353	-0.000502954	0.000536264	0.00409953	-0.00441883	0.00809281	0.00215622	0.00295086	-0.000406315	0.0042551	0.00307602	0.0025581	0.00363848	0.00360645	0.0028121	0.0034248	0.00555599	0.0038488	0.00360724	0.00474865
1.488	0.00329249	-0.000928126	0.00296047	9.40978e-05	0.000857686	0.0042989	-0.00458596	0.00770943	0.00184635	0.00319858	0.00042344	0.00409788	0.00278184	0.00257989	0.00352144	0.00365715	0.00285796	0.00351933	0.00536671	0.003832	0.00354403	0.00448849
1.489	0.00302179	-0.000917922	0.00286925	0.000715695	0.00120511	0.00443373	-0.00465521	0.0073059	0.00155481	0.00328352	0.00126088	0.00391472	0.0025151	0.00263269	0.00343666	0.00369752	0.00288004	0.0036064	0.00514591	0.00378134	0.00352133	0.0042098
1.49	0.00269371	-0.000857997	0.00277167	0.0013532	0.00157571	0.00449831	-0.00463406	0.00688074	0.00128586	0.00319917	0.00208361	0.00371612	0.00229515	0.00271621	0.00338712	0.00373105	0.0028782	0.00368282	0.00489885	0.00370424	0.0035338	0.00391651
1.491	0.00231832	-0.000766235	0.00268283	0.00199289	0.00196866	0.00448829	-0.00453785	0.00643309	0.00104359	0.0029491	0.00286831	0.00351581	0.00214056	0.00282827	0.00337334	0.00375984	0.00285732	0.00374853	0.00463355	0.00361331	0.00357242	0.00361575
1.492	0.00190803	-0.000658496	0.00261477	0.0026204	0.00238163	0.00440838	-0.00438926	0.00596466	0.000828654	0.00254478	0.00359389	0.00332864	0.00206356	0.00296406	0.00339273	0.00378369	0.00282601	0.00380559	0.00435923	0.00352559	0.00362599	0.00331528
1.493	0.0014757	-0.000549338	0.0025763	0.0032212	0.00281122	0.00426898	-0.00421529	0.00547978	0.000640164	0.0020063	0.00424276	0.00316918	0.0020632	0.00311801	0.00344002	0.00380081	0.00279393	0.00385597	0.00408489	0.00345927	0.00368334	0.00302454
1.494	0.00103378	-0.000450913	0.00257227	0.00378096	0.00325271	0.00408489	-0.00404467	0.00498571	0.000476281	0.0013607	0.00480148	0.00304889	0.00212387	0.00328436	0.00350735	0.00380852	0.00276861	0.00390009	0.00381742	0.00342982	0.00373482	0.00275436
1.495	0.000593535	-0.000372085	0.00260323	0.0042859	0.00369989	0.00387379	-0.00390508	0.00449252	0.000334886	0.000639726	0.00526126	0.0029734	0.00222151	0.0034572	0.00358509	0.00380414	0.00275285	0.00393626	0.00356021	0.00344639	0.00377313	0.00251655
1.496	0.000164511	-0.000317712	0.00266587	0.0047228	0.00414519	0.00365506	-0.00382046	0.00401335	0.000213958	-0.00012231	0.00561804	0.00294109	0.00233248	0.00363034	0.0036629	0.00378582	0.00274374	0.00396128	0.0033131	0.00351013	0.0037936	0.00232302
1.497	-0.000246397	-0.000288531	0.00275224	0.00508055	0.00457936	0.00344635	-0.00380853	0.00356293	0.000112455	-0.000891739	0.00587243	0.00294412	0.00243926	0.00379717	0.00373087	0.00375325	0.00273326	0.00397192	0.00307328	0.00361558	0.00379433	0.00218454
1.498	-0.000635284	-0.000281383	0.00285065	0.00535044	0.00499204	0.00326266	-0.00387916	0.00315695	3.05792e-05	-0.00163777	0.00602959	0.00297129	0.00253256	0.00395058	0.00378074	0.00370776	0.00271131	0.00396682	0.00283801	0.00375379	0.00377581	0.00210878
1.499	-0.00100072	-0.000289933	0.00294823	0.00552465	0.00537188	0.00311447	-0.00403367	0.00281085	-2.9761e-05	-0.00233484	0.00609595	0.00301117	0.00261091	0.00408242	0.00380576	0.00365212	0.00266935	0.00394838	0.00260813	0.00391558	0.00373988	0.00209806
1.5	-0.00134472	-0.000302852	0.00302934	0.00560071	0.00570765	0.00300915	-0.00426438	0.00254023	-6.75735e-05	-0.00296444	0.00608266	0.00305461	0.00267982	0.00418391	0.00380325	0.00359073	0.00260199	0.00392334	0.00239277	0.00409449	0.00368946	0.00214959
1.501	-0.00167202	-0.000308501	0.00307836	0.00557995	0.00598894	0.00294946	-0.00455347	0.00235893	-7.99115e-05	-0.00351323	0.00600695	0.00309576	0.00274834	0.00424822	0.00377393	0.00352822	0.00250862	0.00390248	0.00221263	0.00428514	0.00362843	0.00225548
1.502	-0.0019888	-0.000294634	0.00308129	0.0054662	0.00620665	0.00293174	-0.00487547	0.00227736	-6.31348e-05	-0.00397671	0.00588533	0.00313158	0.00282562	0.00426868	0.00372043	0.00346878	0.00239556	0.00389943	0.00209851	0.00448312	0.00356025	0.00240394
1.503	-0.00230239	-0.000248692	0.00302624	0.00526715	0.00635341	0.00294744	-0.00519936	0.00230192	-1.44794e-05	-0.00435885	0.00573362	0.00316064	0.00291761	0.00423958	0.00364735	0.00341626	0.00227545	0.00392722	0.00208268	0.00468392	0.0034876	0.00258183
1.504	-0.00262043	-0.000159449	0.00290446	0.0049942	0.00642427	0.00298407	-0.00549096	0.0024341	6.78147e-05	-0.00467071	0.00556692	0.00318185	0.0030244	0.0041575	0.00356044	0.00337408	0.00216598	0.00399449	0.00218157	0.00488164	0.00341232	0.00277601
1.505	-0.00295002	-1.80493e-05	0.00271102	0.00466209	0.00641709	0.00302659	-0.00571573	0.00266995	0.000183939	-0.00492916	0.00539873	0.00319333	0.00313994	0.00402242	0.00346569	0.00334561	0.00208739	0.00410261	0.00238404	0.0050686	0.00333562	0.00297418
1.506	-0.00329658	0.000181212	0.00244546	0.00428807	0.00633273	0.00305903	-0.00584159	0.00300005	0.000332105	-0.00515477	0.00524003	0.00319208	0.00325388	0.00383898	0.00336847	0.00333454	0.00205834	0.00424501	0.00265817	0.00523587	0.0032585	0.0031656
1.507	-0.00366377	0.000440228	0.00211102	0.00389157	0.00617525	0.00306576	-0.00584185	0.00340916	0.000508283	-0.0053703	0.00509922	0.00317408	0.00335463	0.00361788	0.00327291	0.0033451	0.00209104	0.00440918	0.00296668	0.00537452	0.0031826	0.00334149
1.508	-0.00405275	0.000756597	0.00171442	0.00349332	0.00595153	0.00303329	-0.00569763	0.00387677	0.000706015	-0.00559864	0.00498198	0.00313507	0.00343243	0.00337732	0.00318164	0.00338177	0.00218852	0.00458001	0.00327677	0.00547712	0.00311071	0.00349538
1.509	-0.00446108	0.00112355	0.00126567	0.00311364	0.00567065	0.00295152	-0.00539951	0.00437836	0.000916965	-0.00586029	0.00489001	0.0030716	0.00348154	0.00314425	0.00309564	0.00344825	0.00234591	0.00474288	0.00356308	0.00553896	0.00304675	0.00362368
1.51	-0.0048829	0.00153061	0.000776846	0.00277164	0.00534344	0.0028144	-0.00494927	0.00488651	0.0011314	-0.00617236	0.00481981	0.00298213	0.00350123	0.00295322	0.00301451	0.00354588	0.00255418	0.004886	0.00380753	0.00555913	0.00299485	0.00372587
1.511	-0.00531196	0.00196591	0.000261982	0.00248414	0.00498405	0.00262341	-0.0043578	0.00537298	0.00133584	-0.006548	0.00476976	0.00286835	0.00349805	0.00284254	0.00293714	0.00367359	0.00280339	0.00500097	0.00399874	0.00554122	0.00295988	0.00380357
1.512	-0.00573591	0.00241192	-0.000264989	0.00226399	0.00460529	0.00238382	-0.0036455	0.00580949	0.00151948	-0.00699026	0.00473562	0.00273306	0.00348293	0.00284138	0.0028623	0.00382655	0.00308445	0.005084	0.00413087	0.00549183	0.00294613	0.00386073
1.513	-0.00614142	0.00285082	-0.000790924	0.00211896	0.00422065	0.00210556	-0.00284133	0.00617013	0.00167097	-0.00749728	0.00470981	0.00258281	0.00346906	0.00295513	0.00278841	0.00399641	0.00338736	0.00513423	0.00420273	0.00541959	0.00295493	0.00390215
1.514	-0.00651387	0.00326447	-0.00130431	0.00205149	0.00384297	0.00180258	-0.00198031	0.00643301	0.00178025	-0.00806051	0.00468353	0.00242673	0.00346921	0.00316303	0.0027142	0.00417254	0.00370066	0.0051528	0.00421696	0.00533343	0.00298455	0.00393283
1.515	-0.00683837	0.00363558	-0.00179592	0.00205837	0.00348392	0.00149175	-0.00110097	0.00658171	0.00183932	-0.00866534	0.00464739	0.00227607	0.00349261	0.00342891	0.00263907	0.00434349	0.00401093	0.00514161	0.00417913	0.00524063	0.00303041	0.00395723
1.516	-0.00710072	0.00394912	-0.0022589	0.00213075	0.00315375	0.00119136	-0.000242347	0.00660668	0.00184292	-0.00929176	0.00459196	0.00214344	0.00354257	0.00371482	0.00256375	0.00449843	0.00430315	0.00510223	0.00409684	0.00514533	0.00308596	0.00397897
1.517	-0.00728854	0.00419275	-0.00268945	0.00225482	0.00286063	0.000919594	0.00055847	0.00650587	0.00178872	-0.00991651	0.00450883	0.00204172	0.00361651	0.00398889	0.00249077	0.00462861	0.00456161	0.00503551	0.00397889	0.005048	0.00314424	0.0040006
1.518	-0.00739235	0.00435769	-0.00308672	0.00241288	0.00261043	0.000693058	0.00126906	0.00628497	0.00167739	-0.0105146	0.00439104	0.00198237	0.00370772	0.00422775	0.00242499	0.00472826	0.00477122	0.0049416	0.00383458	0.00494623	0.00319907	0.00402405
1.519	-0.00740618	0.00443959	-0.00345185	0.00258432	0.00240726	0.000525205	0.00186418	0.00595744	0.00151262	-0.0110603	0.00423333	0.001973	0.00380786	0.00441605	0.00237379	0.00479492	0.00491887	0.00482029	0.00367322	0.00483654	0.00324572	0.00405127
1.52	-0.00732617	0.0044394	-0.00378778	0.00274831	0.00225276	0.000424822	0.00232665	0.0055421	0.00130232	-0.0115278	0.00403085	0.00201478	0.00390979	0.00454586	0.00234635	0.00482947	0.00499472	0.00467239	0.0035031	0.00471708	0.0032801	0.00408454
1.521	-0.00715779	0.00436144	-0.00409735	0.00288197	0.00214917	0.000394974	0.00265001	0.00506657	0.00105305	-0.0118998	0.00378237	0.00210328	0.00400775	0.00461485	0.00235201	0.00483621	0.00499311	0.00449986	0.00333273	0.0045887	0.00330088	0.00412603
1.522	-0.00690712	0.00421415	-0.00438484	0.0029653	0.0020955	0.000435267	0.00283653	0.00456134	0.000773444	-0.0121566	0.00349161	0.00222672	0.00410083	0.00462433	0.0023985	0.00482274	0.00491373	0.00430623	0.00316971	0.00445915	0.00330912	0.00417808
1.523	-0.00658501	0.00400942	-0.00465326	0.00298103	0.00209037	0.000538312	0.00289799	0.00405872	0.00047257	-0.0122851	0.00316347	0.00237	0.00418925	0.00457939	0.00248882	0.00479813	0.00476104	0.0040977	0.0030197	0.0043409	0.00330571	0.0042418
1.524	-0.00620593	0.00376164	-0.0049042	0.00291621	0.00213204	0.000691287	0.00285402	0.00359093	0.000158772	-0.0122779	0.00280485	0.00251659	0.0042735	0.00448753	0.0026209	0.00477201	0.00454453	0.00388276	0.00288608	0.00424985	0.00329151	0.00431647
1.525	-0.00578691	0.00348671	-0.00513745	0.00276319	0.00221855	0.000877001	0.00273018	0.00318778	-0.000161121	-0.0121334	0.00242438	0.00265019	0.00435301	0.00435783	0.00278885	0.00475339	0.00427835	0.00367155	0.0027694	0.00420163	0.00326724	0.00439916
1.526	-0.00534617	0.00320118	-0.00535063	0.00252054	0.00234809	0.00107467	0.00255583	0.00287486	-0.000482024	-0.0118549	0.00203175	0.002756	0.00442502	0.00420054	0.00298539	0.0047494	0.00398098	0.00347489	0.00266724	0.0042065	0.00323381	0.00448485
1.527	-0.00490245	0.0029206	-0.00553961	0.00219271	0.00251883	0.00126258	0.00236111	0.00267096	-0.000801587	-0.0114507	0.00163727	0.00282208	0.00448492	0.0040271	0.0032039	0.00476443	0.00367394	0.00330369	0.00257456	0.00426531	0.0031929	0.00456704
1.528	-0.00447385	0.00265853	-0.00569885	0.00178973	0.00272883	0.00141974	0.00217439	0.00258696	-0.00112042	-0.0109339	0.00125117	0.00284049	0.00452693	0.00385038	0.00343977	0.00479963	0.00338058	0.00316796	0.00248496	0.00436843	0.00314782	0.00463886
1.529	-0.00407623	0.00242625	-0.00582163	0.00132693	0.0029762	0.00152655	0.00202046	0.0026255	-0.0014411	-0.0103203	0.000882589	0.00280836	0.00454517	0.0036849	0.00369078	0.00485301	0.00312496	0.00307583	0.00239252	0.00449814	0.00310414	0.00469421
1.53	-0.00372182	0.00223209	-0.00590073	0.000824557	0.00325882	0.00156689	0.00191786	0.00278019	-0.0017672	-0.00962778	0.000538762	0.00272889	0.00453521	0.00354655	0.00395616	0.00491985	0.00292883	0.00303314	0.00229365	0.00463384	0.00306932	0.00472877
1.531	-0.00342047	0.00207992	-0.00592901	0.000304778	0.00357423	0.00152897	0.00187803	0.00303599	-0.00210424	-0.00887679	0.000224541	0.0026128	0.00449495	0.00345095	0.00423573	0.00499364	0.00280761	0.00304264	0.00218905	0.00475684	0.00305207	0.00474046
1.532	-0.00317812	0.00196976	-0.00590156	-0.000211061	0.00391927	0.00140764	0.00190539	0.00337094	-0.00245932	-0.0080875	-5.66026e-05	0.00247803	0.00442642	0.00341067	0.00452848	0.00506668	0.00276686	0.00310273	0.00208558	0.00485302	0.00306192	0.00472906
1.533	-0.00299397	0.00189943	-0.00581558	-0.000700367	0.00428975	0.00120412	0.00199566	0.00375732	-0.0028369	-0.00727664	-0.000304288	0.00234844	0.00433539	0.00343158	0.00482999	0.00513059	0.00280104	0.00320806	0.0019968	0.00491598	0.00310474	0.00469607
1.534	-0.00286433	0.00186238	-0.00567023	-0.00114324	0.00468065	0.000925718	0.00213726	0.00416345	-0.00324012	-0.00646117	-0.000520143	0.00225173	0.00422939	0.00351052	0.00513287	0.00517702	0.0028962	0.00334954	0.00194232	0.00494765	0.00318064	0.00464395
1.535	-0.00278174	0.00184938	-0.00546754	-0.0015234	0.005086	0.000585623	0.00231229	0.0045562	-0.0036697	-0.00565613	-0.000708136	0.00221215	0.00411693	0.00363563	0.00542662	0.00519812	0.00303529	0.00351492	0.00194349	0.00495782	0.00328358	0.00457521
1.536	-0.00273545	0.00184962	-0.00521194	-0.00182907	0.00549881	0.000201687	0.0024981	0.00490349	-0.00412322	-0.00487397	-0.00087433	0.00224146	0.00400554	0.00378913	0.00569847	0.00518712	0.00320248	0.00369003	0.00201564	0.00496228	0.00340283	0.00449177
1.537	-0.0027129	0.0018511	-0.00491081	-0.00205396	0.00591156	-0.000204101	0.00266942	0.00517629	-0.00459504	-0.00412522	-0.00102628	0.00233426	0.00390037	0.00395168	0.00593462	0.00513875	0.00338464	0.00386033	0.0021611	0.00497972	0.00352548	0.00439467
1.538	-0.00270097	0.00184152	-0.00457456	-0.00219792	0.0063167	-0.000607081	0.00280052	0.00535117	-0.00507661	-0.00341863	-0.00117249	0.00247196	0.00380312	0.00410606	0.00612158	0.00504982	0.00357153	0.00401247	0.00236853	0.00502757	0.00363937	0.00428432
1.539	-0.00268629	0.00180994	-0.00421471	-0.00226601	0.00670654	-0.000982574	0.00286721	0.00541216	-0.00555647	-0.00276039	-0.00132187	0.00263154	0.00371182	0.00423894	0.00624777	0.00491989	0.00375564	0.00413576	0.00261844	0.00511757	0.00373576	0.00416127
1.54	-0.00265668	0.00174731	-0.00384343	-0.00226817	0.00707383	-0.0013072	0.00284887	0.00535169	-0.00602095	-0.00215475	-0.00148299	0.00279308	0.00362216	0.0043421	0.00630448	0.00475183	0.00393129	0.00422331	0.00288969	0.00525276	0.00381078	0.00402714
1.541	-0.00260175	0.00164764	-0.00347059	-0.0022158	0.00741242	-0.00156141	0.0027289	0.00517059	-0.00645412	-0.00160467	-0.00166395	0.00294286	0.0035293	0.00441297	0.00628606	0.00455265	0.00409414	0.00427204	0.003163	0.00542649	0.00386505	0.00388548
1.542	-0.00251427	0.00150507	-0.00310875	-0.00212854	0.00771707	-0.00172815	0.00250057	0.00487865	-0.00684422	-0.0011139	-0.00187026	0.00307387	0.00342963	0.00445392	0.00619315	0.00433239	0.00424044	0.00428453	0.00342283	0.00562625	0.00390564	0.00374268
1.543	-0.00239033	0.00132151	-0.00276601	-0.00202332	0.00798373	-0.00179769	0.00216118	0.00449409	-0.00717456	-0.000678798	-0.00210609	0.00318465	0.00332407	0.00447073	0.00602833	0.00410548	0.00436694	0.0042677	0.00365828	0.00583495	0.00394453	0.00360714
1.544	-0.00222971	0.00109999	-0.00244763	-0.00191686	0.00821008	-0.00176559	0.00171652	0.00404103	-0.00743213	-0.000297687	-0.00237253	0.00327658	0.00321703	0.00447184	0.00579821	0.00388938	0.00447079	0.00423139	0.00386208	0.00603531	0.00399421	0.00348891
1.545	-0.00203561	0.000846391	-0.00215541	-0.00182376	0.0083953	-0.00163388	0.00117932	0.0035478	-0.00760646	3.22039e-05	-0.00266802	0.00335179	0.00311712	0.00446626	0.00551241	0.00370302	0.00454931	0.0041868	0.00403107	0.00621226	0.00406581	0.00339763
1.546	-0.00181379	0.000569156	-0.00188707	-0.00175518	0.00853953	-0.00141149	0.000568479	0.00304472	-0.00769032	0.000315033	-0.0029886	0.00341133	0.00303587	0.00446156	0.00518283	0.00356398	0.00460034	0.00414443	0.00416605	0.00635426	0.00416638	0.00334022
1.547	-0.0015728	0.000278078	-0.0016371	-0.00171779	0.00864431	-0.00111252	-9.24382e-05	0.00256111	-0.00768003	0.000555686	-0.00332807	0.00345453	0.0029859	0.00446262	0.00482288	0.00348416	0.00462176	0.00411202	0.00427177	0.00645369	0.00429718	0.00331902
1.548	-0.0013237	-1.67455e-05	-0.00139818	-0.00171353	0.00871262	-0.000754665	-0.000776998	0.00212301	-0.00757578	0.000759411	-0.0036783	0.0034791	0.0029781	0.00447121	0.00444672	0.003466	0.00461149	0.00409339	0.00435647	0.00650654	0.00445392	0.00333115
1.549	-0.00107762	-0.000305139	-0.00116058	-0.00173915	0.0087473	-0.000359709	-0.00145731	0.00175141	-0.00738127	0.000932729	-0.00403003	0.0034818	0.00301858	0.00448554	0.00406894	0.00350186	0.00456894	0.00408834	0.00443088	0.00651175	0.0046284	0.00336954
1.55	-0.000845438	-0.000578059	-0.000913726	-0.00178645	0.00875115	4.88449e-05	-0.00210601	0.00146027	-0.00710321	0.00108285	-0.00437352	0.00346011	0.0031072	0.00450144	0.0037044	0.00357581	0.00449506	0.00409394	0.00450685	0.00647047	0.00481077	0.00342507
1.551	-0.000636271	-0.000829107	-0.000645971	-0.00184239	0.0087268	0.000446172	-0.00269815	0.00125481	-0.00674999	0.00121707	-0.00469989	0.00341316	0.00323818	0.00451381	0.00336821	0.0036675	0.00439259	0.00410564	0.00459512	0.00638515	0.00499142	0.00348865
1.552	-0.000458402	-0.00105401	-0.000349503	-0.00189145	0.00867592	0.000812324	-0.00321209	0.00113181	-0.0063342	0.00134194	-0.00500004	0.00334358	0.00340183	0.00451817	0.0030758	0.00375608	0.0042664	0.0041209	0.0047035	0.00625971	0.00516228	0.00355326
1.553	-0.000317328	-0.00125033	-1.95476e-05	-0.00191609	0.00859903	0.00112842	-0.00363149	0.00108074	-0.00586633	0.00146644	-0.00526552	0.00325806	0.00358582	0.00451062	0.00284166	0.00382404	0.00412362	0.00413922	0.004836	0.00609931	0.00531827	0.00361492
1.554	-0.000215613	-0.00141925	0.000346252	-0.0018977	0.00849551	0.00137899	-0.00394599	0.00108361	-0.00535543	0.00159849	-0.00549013	0.0031656	0.00377751	0.00448927	0.00267817	0.0038574	0.00397286	0.00416152	0.00499092	0.00590985	0.00545592	0.00367176
1.555	-0.00015331	-0.00156538	0.000745839	-0.00181843	0.00836373	0.00155449	-0.00415117	0.00111684	-0.00481003	0.00174416	-0.00566942	0.0030761	0.00396504	0.00445437	0.00259244	0.00384601	0.00382334	0.00418976	0.00516129	0.00569825	0.00557255	0.00372338
1.556	-0.000127707	-0.00169577	0.00117285	-0.00166268	0.00820114	0.00165073	-0.00424847	0.00115361	-0.00423672	0.00190849	-0.00580095	0.00299846	0.00413741	0.00440796	0.00258327	0.00378408	0.0036837	0.00422515	0.00533652	0.00547255	0.00566551	0.00377003
1.557	-0.000133931	-0.00181959	0.00161672	-0.00141834	0.00800511	0.00166955	-0.00424515	0.0011661	-0.00363981	0.00209444	-0.0058837	0.00293851	0.00428494	0.00435364	0.002641	0.00367003	0.00356041	0.00426672	0.00550461	0.00524151	0.00573178	0.0038119
1.558	-0.000165896	-0.00194751	0.00206264	-0.00107816	0.00777383	0.0016188	-0.00415393	0.00112795	-0.00302163	0.00230189	-0.00591735	0.0028978	0.0043996	0.00429646	0.00275052	0.00350657	0.00345659	0.00431052	0.00565426	0.00501385	0.00576796	0.00384868
1.559	-0.000216383	-0.00209012	0.0024931	-0.000640205	0.00750597	0.00151053	-0.00399096	0.00101707	-0.00238278	0.00252919	-0.00590284	0.00287423	0.00447513	0.00424257	0.00289591	0.00330145	0.00337184	0.00434953	0.00577643	0.00479694	0.0057702	0.00388008
1.56	-0.000277987	-0.00225723	0.00288898	-0.000108207	0.00720161	0.0013603	-0.00377492	0.000817606	-0.00172272	0.00277253	-0.00584156	0.00286379	0.00450761	0.00419899	0.0030639	0.00306797	0.00330257	0.00437493	0.00586565	0.00459536	0.00573507	0.00390629
1.561	-0.000343711	-0.00245732	0.00323136	0.000508625	0.00686287	0.00118553	-0.00352582	0.000521388	-0.00104078	0.00302611	-0.0057349	0.00286274	0.00449592	0.00417304	0.00324506	0.00282558	0.00324342	0.00437757	0.00592046	0.00440951	0.00566043	0.00392854
1.562	-0.000406929	-0.00269674	0.00350296	0.00119606	0.00649418	0.00100437	-0.00326358	0.000128594	-0.000337203	0.0032824	-0.0055839	0.00286873	0.00444222	0.0041714	0.00343311	0.00260003	0.00318876	0.00434971	0.00594307	0.00423501	0.00554614	0.00394944
1.563	-0.000463067	-0.00297469	0.00368573	0.00193533	0.00610115	0.000837401	-0.0030047	-0.000350311	0.000387257	0.00353305	-0.00538944	0.00288321	0.00435203	0.00419897	0.00362571	0.00242155	0.00313485	0.00428842	0.00593993	0.00406405	0.00539538	0.00397195
1.564	-0.000510756	-0.00329071	0.00377031	0.00270497	0.00569358	0.000697817	-0.00276527	-0.000896754	0.00112966	0.00377011	-0.00515136	0.00290951	0.00423277	0.00425723	0.00382287	0.0023194	0.00308161	0.00419336	0.00592053	0.0038867	0.00521442	0.00399908
1.565	-0.000549891	-0.00363977	0.003751	0.00348221	0.00528244	0.000597032	-0.00255684	-0.00148499	0.00188429	0.00398549	-0.00486955	0.00295054	0.00409447	0.00434274	0.00402341	0.00230982	0.00303164	0.00406925	0.00589519	0.00369271	0.00501243	0.00403264
1.566	-0.000582028	-0.00401303	0.00362794	0.00424479	0.00488022	0.000541505	-0.00238606	-0.00208359	0.00264254	0.00417276	-0.00454394	0.00300711	0.00394803	0.00444709	0.00422507	0.00238775	0.00299038	0.00392487	0.00587401	0.0034743	0.00480078	0.00407209
1.567	-0.000610007	-0.00439903	0.00340727	0.0049717	0.00450024	0.000532573	-0.00225513	-0.00265802	0.00339311	0.00432729	-0.00417476	0.00307672	0.00380405	0.00455784	0.00442381	0.00252914	0.00296512	0.00377248	0.00586567	0.0032282	0.00459222	0.00411391
1.568	-0.000637723	-0.00478477	0.00310078	0.00564341	0.00415587	0.000566695	-0.00216283	-0.00317417	0.00412238	0.00444579	-0.00376325	0.00315367	0.00367157	0.00466023	0.0046134	0.00270249	0.00296339	0.0036267	0.00587668	0.00295742	0.00439997	0.00415208
1.569	-0.000669069	-0.00515533	0.0027251	0.00624497	0.00385955	0.000634548	-0.00210259	-0.00359991	0.00481505	0.00452851	-0.00331222	0.00323055	0.00355642	0.00473942	0.00478677	0.00287927	0.00299157	0.00350158	0.00591057	0.0026729	0.00423582	0.00417923
1.57	-0.000707354	-0.00549563	0.00230051	0.00676607	0.00362192	0.000722146	-0.00206395	-0.00390798	0.00545524	0.00457877	-0.00282644	0.00330035	0.00346103	0.00478265	0.00493666	0.00303875	0.00305349	0.0034085	0.00596805	0.00239503	0.00410907	0.00418816
1.571	-0.000754672	-0.00579146	0.00184947	0.0072015	0.00345105	0.000811862	-0.00203333	-0.00407814	0.00602758	0.00460286	-0.00231298	0.00335833	0.00338483	0.00478111	0.00505648	0.00316892	0.00314973	0.00335392	0.0060473	0.00215467	0.00402565	0.0041734
1.572	-0.000811576	-0.00603194	0.00139592	0.00755047	0.00335222	0.000881293	-0.00199591	-0.00410191	0.00651817	0.00460977	-0.00178216	0.00340257	0.00332545	0.0047312	0.00514089	0.00326558	0.00327686	0.0033371	0.00614262	0.00199076	0.00398756	0.00413219
1.573	-0.000875074	-0.00620532	0.000959697	0.00781928	0.00332478	0.00091252	-0.00193359	-0.00397346	0.00691635	0.00460973	-0.00124436	0.00343531	0.00327993	0.00463602	0.00518589	0.00333093	0.00343031	0.00335373	0.00624949	0.00193871	0.00399252	0.0040651
1.574	-0.000942411	-0.00630613	0.000560174	0.00801667	0.00336697	0.00088609	-0.00183026	-0.00369968	0.00721554	0.00461581	-0.000713684	0.00346273	0.00324592	0.00450507	0.00519149	0.00337224	0.00360384	0.00339462	0.00636195	0.0020088	0.00403592	0.00397618
1.575	-0.00100846	-0.00633347	0.000212123	0.00815525	0.00347272	0.000784698	-0.00167052	-0.00329709	0.00741364	0.0046408	-0.000205239	0.00349151	0.00322234	0.00435374	0.00515873	0.00339889	0.0037896	0.00344891	0.00647179	0.00217868	0.00411021	0.00387189
1.576	-0.00106661	-0.00629054	-7.50216e-05	0.00825071	0.00363258	0.00059497	-0.00144063	-0.00279008	0.00751328	0.00469702	0.000265553	0.00352693	0.00320919	0.00420153	0.0050903	0.00342035	0.00397905	0.0035059	0.00656979	0.0024081	0.00420517	0.0037597
1.577	-0.00110957	-0.0061849	-0.000297839	0.00831964	0.00383446	0.000308956	-0.00113011	-0.00220863	0.00752214	0.00479489	0.00068419	0.00357121	0.00320712	0.00406878	0.00499008	0.00344401	0.00416339	0.0035564	0.00664643	0.00265742	0.00430904	0.00364634
1.578	-0.00113011	-0.00602818	-0.000459292	0.00837639	0.00406403	-7.45295e-05	-0.000734013	-0.00158611	0.0074525	0.00494053	0.00103843	0.00362266	0.00321667	0.00397209	0.0048623	0.00347372	0.00433389	0.00359375	0.00669276	0.00289555	0.00441026	0.00353647
1.579	-0.001122	-0.0058342	-0.000567737	0.00843485	0.00430633	-0.000550248	-0.0002512	-0.000957274	0.00731966	0.00513704	0.00131895	0.0036764	0.00323761	0.0039199	0.00471227	0.00350946	0.00448232	0.00361355	0.00670156	0.00310038	0.00449735	0.00343241
1.58	-0.00108079	-0.00561828	-0.000636348	0.00850606	0.00454659	-0.00110608	0.000314502	-0.000355321	0.00714102	0.00538309	0.00152076	0.00372613	0.00326881	0.00390991	0.0045459	0.00354809	0.00460142	0.00361416	0.00666834	0.00325678	0.00456047	0.00333458
1.581	-0.0010045	-0.00539616	-0.000681885	0.00859734	0.00477123	-0.00172343	0.00095433	0.000190425	0.00693474	0.0056727	0.00164412	0.00376624	0.00330837	0.00393018	0.00436986	0.00358498	0.00468529	0.00359682	0.00659205	0.003355	0.00459258	0.00324292
1.582	-0.000895078	-0.00518253	-0.000722311	0.00871157	0.00496881	-0.00237936	0.00165417	0.000654646	0.00671769	0.00599522	0.00169448	0.00379335	0.00335388	0.00396324	0.00419159	0.0036153	0.0047293	0.00356543	0.00647462	0.00338932	0.00459028	0.00315878
1.583	-0.000757574	-0.00498848	-0.000776325	0.00884774	0.00512966	-0.00304686	0.00239622	0.00102147	0.00650458	0.00633453	0.00168562	0.00380748	0.0034027	0.00399147	0.00401932	0.00363508	0.00473101	0.00352681	0.00632195	0.00335814	0.00455388	0.00308608
1.584	-0.000598258	-0.00482371	-0.000862953	0.00900001	0.00524754	-0.00369261	0.00316114	0.00128666	0.00630779	0.00667161	0.00163694	0.00381242	0.00345248	0.00400215	0.00386208	0.00364342	0.00469159	0.00349041	0.00614495	0.00326508	0.004488	0.00303164
1.585	-0.000426598	-0.00469601	-0.000996858	0.0091572	0.00532145	-0.00428371	0.00392627	0.00144948	0.00613508	0.00698733	0.00156813	0.00381319	0.00350099	0.00398911	0.00372808	0.00364198	0.00461351	0.00346565	0.00595501	0.00311747	0.00440098	0.00300335
1.586	-0.000254454	-0.00460839	-0.00118883	0.00930609	0.00535311	-0.00478931	0.00466893	0.00151737	0.0059889	0.00726061	0.00150532	0.00381392	0.00354591	0.00395379	0.00362332	0.0036325	0.0045011	0.00346057	0.00576312	0.0029275	0.00430238	0.00300787
1.587	-9.47177e-05	-0.00456001	-0.00144431	0.00943131	0.00534731	-0.00518174	0.00536708	0.00150417	0.00586688	0.0074709	0.00147661	0.00381591	0.00358465	0.00390438	0.0035505	0.00361665	0.00436001	0.00347983	0.00557826	0.00271272	0.00420179	0.00304736
[truncated: 108 more rows]

## Sheet: Fig 4
fig 4c											fig 4d						fig 4e
[truncated: 83 more rows]

## Sheet: Fig 5
Fig 5b						Fig 5d half width					Fig. 5c	LY							Fig. 5e
[truncated: 70 more rows]

## Sheet: Fig 6
control	LY
-20	-30
-20	-30
-20	-30
-25	-30
-20	-35
-10	-30
-20	-30
-20	-20
-20	-30
-20	-30

## Sheet: Fig 7
Vm fast event amplitude CDF									Vm fast event frequency
[truncated: 2,921 more rows]

[truncated: 1 more sheets: Fig 8]
